# Supplementary material
Source: publisher figshare collection journal article supplement (https://acs.figshare.com/ndownloader/files/4917004)
Supplement: Supplementary file 1 [file 4917004]

 
data_schindler14016 
  
_audit_creation_method            'SHELXL-2014/7' 
_shelx_SHELXL_version_number      '2014/7' 
_chemical_name_systematic         ? 
_chemical_name_common             '[Cu4OCl6(THF)(urea)3]*3THF*1urea' 
_chemical_melting_point           ? 
_chemical_formula_moiety          ? 
_chemical_formula_sum 
 'C20 H48 Cl6 Cu4 N8 O9' 
_chemical_formula_weight          1011.52 
  
loop_ 
 _atom_type_symbol 
 _atom_type_description 
 _atom_type_scat_dispersion_real 
 _atom_type_scat_dispersion_imag 
 _atom_type_scat_source 
 'C'  'C'   0.0033   0.0016 
 'International Tables Vol C Tables 4.2.6.8 and 6.1.1.4' 
 'H'  'H'   0.0000   0.0000 
 'International Tables Vol C Tables 4.2.6.8 and 6.1.1.4' 
 'N'  'N'   0.0061   0.0033 
 'International Tables Vol C Tables 4.2.6.8 and 6.1.1.4' 
 'O'  'O'   0.0106   0.0060 
 'International Tables Vol C Tables 4.2.6.8 and 6.1.1.4' 
 'Cl'  'Cl'   0.1484   0.1585 
 'International Tables Vol C Tables 4.2.6.8 and 6.1.1.4' 
 'Cu'  'Cu'   0.3201   1.2651 
 'International Tables Vol C Tables 4.2.6.8 and 6.1.1.4' 
  
_space_group_crystal_system       triclinic 
_space_group_IT_number            2 
_space_group_name_H-M_alt         'P -1' 
_space_group_name_Hall            '-P 1' 
  
_shelx_space_group_comment 
; 
The symmetry employed for this shelxl refinement is uniquely defined 
by the following loop, which should always be used as a source of 
symmetry information in preference to the above space-group names. 
They are only intended as comments. 
; 
  
loop_ 
 _space_group_symop_operation_xyz 
 'x, y, z' 
 '-x, -y, -z' 
  
_cell_length_a                    9.924(2) 
_cell_length_b                    13.194(3) 
_cell_length_c                    15.652(3) 
_cell_angle_alpha                 84.35(3) 
_cell_angle_beta                  74.98(3) 
_cell_angle_gamma                 74.68(3) 
_cell_volume                      1908.1(8) 
_cell_formula_units_Z             2 
_cell_measurement_temperature     150(2) 
_cell_measurement_reflns_used     1074 
_cell_measurement_theta_min       1.00 
_cell_measurement_theta_max       24.12 
  
_exptl_crystal_description        block 
_exptl_crystal_colour             yellow-green 
_exptl_crystal_density_meas       ? 
_exptl_crystal_density_method     ? 
_exptl_crystal_density_diffrn     1.761 
_exptl_crystal_F_000              1028 
_exptl_transmission_factor_min    ? 
_exptl_transmission_factor_max    ? 
_exptl_crystal_size_max           0.300 
_exptl_crystal_size_mid           0.175 
_exptl_crystal_size_min           0.050 
_exptl_absorpt_coefficient_mu     2.673 
_shelx_estimated_absorpt_T_min    0.501 
_shelx_estimated_absorpt_T_max    0.878 
_exptl_absorpt_correction_type    Empirical 
_exptl_absorpt_correction_T_min   0.5246 
_exptl_absorpt_correction_T_max   0.7456 
_exptl_absorpt_process_details 
  
; 
 Platon MULABS semi-empirical method using multiple scanned reflections 
  
; 
  
_exptl_absorpt_special_details    ? 
_diffrn_ambient_temperature       150(2) 
_diffrn_radiation_wavelength      0.71073 
_diffrn_radiation_type            MoK\a 
_diffrn_source                    'Bruker Nonius FR591 rotating anode' 
_diffrn_measurement_device_type   'Bruker Nonius KappaCCD' 
_diffrn_measurement_method        'omega and phi scans' 
_diffrn_detector_area_resol_mean  ? 
_diffrn_reflns_number             43156 
_diffrn_reflns_av_unetI/netI      0.0663 
_diffrn_reflns_av_R_equivalents   0.1176 
_diffrn_reflns_limit_h_min        -11 
_diffrn_reflns_limit_h_max        11 
_diffrn_reflns_limit_k_min        -15 
_diffrn_reflns_limit_k_max        15 
_diffrn_reflns_limit_l_min        -18 
_diffrn_reflns_limit_l_max        18 
_diffrn_reflns_theta_min          2.373 
_diffrn_reflns_theta_max          25.026 
_diffrn_reflns_theta_full         25.026 
_diffrn_measured_fraction_theta_max   0.999 
_diffrn_measured_fraction_theta_full  0.999 
_diffrn_reflns_Laue_measured_fraction_max    0.999 
_diffrn_reflns_Laue_measured_fraction_full   0.999 
_diffrn_reflns_point_group_measured_fraction_max   0.999 
_diffrn_reflns_point_group_measured_fraction_full  0.999 
_reflns_number_total              6726 
_reflns_number_gt                 4938 
_reflns_threshold_expression      'I > 2\s(I)' 
_reflns_Friedel_coverage          0.000 
_reflns_Friedel_fraction_max      . 
_reflns_Friedel_fraction_full     . 
  
_reflns_special_details 
; 
 Reflections were merged by SHELXL according to the crystal 
 class for the calculation of statistics and refinement. 
  
 _reflns_Friedel_fraction is defined as the number of unique 
 Friedel pairs measured divided by the number that would be 
 possible theoretically, ignoring centric projections and 
 systematic absences. 
; 
  
_computing_data_collection        'Bruker XSCANS' 
_computing_cell_refinement        'Bruker XSCANS' 
_computing_data_reduction         'Bruker SHELXTL' 
_computing_structure_solution     'Bruker SHELXTL' 
_computing_structure_refinement 'SHELXL-2014/7 (Sheldrick, 2014)' 
_computing_molecular_graphics     'Bruker SHELXTL' 
_computing_publication_material   'Bruker SHELXTL' 
_refine_special_details           ? 
_refine_ls_structure_factor_coef  Fsqd 
_refine_ls_matrix_type            full 
_refine_ls_weighting_scheme       calc 
_refine_ls_weighting_details 
'w=1/[\s^2^(Fo^2^)+(0.0363P)^2^] where P=(Fo^2^+2Fc^2^)/3' 
_atom_sites_solution_primary      ? 
_atom_sites_solution_secondary    ? 
_atom_sites_solution_hydrogens    geom 
_refine_ls_hydrogen_treatment     constr 
_refine_ls_extinction_method      none 
_refine_ls_extinction_coef        . 
_refine_ls_number_reflns          6726 
_refine_ls_number_parameters      424 
_refine_ls_number_restraints      0 
_refine_ls_R_factor_all           0.0564 
_refine_ls_R_factor_gt            0.0332 
_refine_ls_wR_factor_ref          0.0796 
_refine_ls_wR_factor_gt           0.0734 
_refine_ls_goodness_of_fit_ref    0.964 
_refine_ls_restrained_S_all       0.964 
_refine_ls_shift/su_max           0.001 
_refine_ls_shift/su_mean          0.000 
  
loop_ 
 _atom_site_label 
 _atom_site_type_symbol 
 _atom_site_fract_x 
 _atom_site_fract_y 
 _atom_site_fract_z 
 _atom_site_U_iso_or_equiv 
 _atom_site_adp_type 
 _atom_site_occupancy 
 _atom_site_site_symmetry_order 
 _atom_site_calc_flag 
 _atom_site_refinement_flags_posn 
 _atom_site_refinement_flags_adp 
 _atom_site_refinement_flags_occupancy 
 _atom_site_disorder_assembly 
 _atom_site_disorder_group 
Cu1 Cu 0.10397(4) 0.89839(3) 0.24982(3) 0.02314(12) Uani 1 1 d . . . . . 
C1 C 0.0690(4) 1.0866(3) 0.3369(2) 0.0252(8) Uani 1 1 d . . . . . 
O1 O 0.0683(2) 0.77642(18) 0.21409(14) 0.0202(5) Uani 1 1 d . . . . . 
Cu2 Cu 0.24085(4) 0.69281(3) 0.14691(3) 0.02274(12) Uani 1 1 d . . . . . 
O2 O 0.1555(2) 1.01316(19) 0.28790(16) 0.0272(6) Uani 1 1 d . . . . . 
C3 C -0.1623(4) 0.6457(3) 0.4913(2) 0.0248(8) Uani 1 1 d . . . . . 
N2 N -0.0661(3) 1.1228(3) 0.3335(2) 0.0376(9) Uani 1 1 d . . . . . 
H2C H -0.1001 1.0964 0.2966 0.045 Uiso 1 1 calc R U . . . 
H2D H -0.1227 1.1736 0.3683 0.045 Uiso 1 1 calc R U . . . 
Cu3 Cu -0.06751(4) 0.81636(4) 0.14400(3) 0.02475(12) Uani 1 1 d . . . . . 
N6 N -0.2695(3) 0.7309(2) 0.4923(2) 0.0314(8) Uani 1 1 d . . . . . 
H6C H -0.2754 0.7690 0.4434 0.038 Uiso 1 1 calc R U . . . 
H6D H -0.3348 0.7493 0.5419 0.038 Uiso 1 1 calc R U . . . 
C2 C 0.5271(4) 0.5668(3) 0.1097(2) 0.0283(9) Uani 1 1 d . . . . . 
Cu4 Cu -0.00494(4) 0.69935(3) 0.31743(3) 0.02368(12) Uani 1 1 d . . . . . 
C8 C 0.4979(4) 0.9940(3) 0.3687(3) 0.0314(9) Uani 1 1 d . . . . . 
O3 O 0.4164(2) 0.60544(19) 0.08109(16) 0.0262(6) Uani 1 1 d . . . . . 
N7 N -0.1592(3) 0.5896(3) 0.5656(2) 0.0375(8) Uani 1 1 d . . . . . 
H7C H -0.0904 0.5319 0.5666 0.045 Uiso 1 1 calc R U . . . 
H7D H -0.2260 0.6099 0.6142 0.045 Uiso 1 1 calc R U . . . 
Cl5 Cl -0.22047(9) 0.73429(8) 0.26262(6) 0.0294(2) Uani 1 1 d . . . . . 
C4 C -0.2806(5) 0.7862(4) 0.0578(3) 0.0468(12) Uani 1 1 d . . . . . 
H4A H -0.3604 0.7774 0.1088 0.056 Uiso 1 1 calc R U . . . 
H4B H -0.2114 0.7170 0.0447 0.056 Uiso 1 1 calc R U . . . 
O6 O 0.3889(3) 1.0361(2) 0.42473(17) 0.0375(7) Uani 1 1 d . . . . . 
N5 N 0.5506(3) 0.6033(3) 0.1796(2) 0.0333(8) Uani 1 1 d . . . . . 
H5C H 0.4871 0.6569 0.2079 0.040 Uiso 1 1 calc R U . . . 
H5D H 0.6296 0.5738 0.1974 0.040 Uiso 1 1 calc R U . . . 
Cl1 Cl 0.33732(9) 0.84055(7) 0.15898(6) 0.0332(2) Uani 1 1 d . . . . . 
C5 C -0.3375(5) 0.8324(4) -0.0225(3) 0.0569(14) Uani 1 1 d . . . . . 
H5A H -0.3450 0.7767 -0.0578 0.068 Uiso 1 1 calc R U . . . 
H5B H -0.4327 0.8828 -0.0052 0.068 Uiso 1 1 calc R U . . . 
O5 O -0.2122(3) 0.8597(2) 0.07575(17) 0.0353(7) Uani 1 1 d . . . . . 
N4 N 0.6258(3) 0.4846(3) 0.0710(2) 0.0428(9) Uani 1 1 d . . . . . 
H4C H 0.6138 0.4572 0.0253 0.051 Uiso 1 1 calc R U . . . 
H4D H 0.7033 0.4575 0.0910 0.051 Uiso 1 1 calc R U . . . 
Cl2 Cl 0.11337(9) 0.71938(8) 0.03102(6) 0.0330(2) Uani 1 1 d . . . . . 
C6 C -0.2241(6) 0.8866(4) -0.0723(3) 0.0654(15) Uani 1 1 d . . . . . 
H6A H -0.1395 0.8358 -0.1064 0.079 Uiso 1 1 calc R U . . . 
H6B H -0.2623 0.9420 -0.1134 0.079 Uiso 1 1 calc R U . . . 
O8 O -0.4104(3) 0.7098(2) 0.68761(18) 0.0422(7) Uani 1 1 d . . . . . 
N8 N 0.4887(3) 0.9712(3) 0.2887(2) 0.0394(9) Uani 1 1 d . . . . . 
H8C H 0.4044 0.9863 0.2756 0.047 Uiso 1 1 calc R U . . . 
H8D H 0.5670 0.9413 0.2495 0.047 Uiso 1 1 calc R U . . . 
Cl3 Cl -0.08939(9) 0.99239(7) 0.17558(6) 0.0312(2) Uani 1 1 d . . . . . 
C7 C -0.1855(5) 0.9325(4) -0.0029(3) 0.0516(12) Uani 1 1 d . . . . . 
H7A H -0.2467 1.0045 0.0098 0.062 Uiso 1 1 calc R U . . . 
H7B H -0.0832 0.9352 -0.0206 0.062 Uiso 1 1 calc R U . . . 
O7 O -0.2443(3) 1.2697(2) 0.46295(17) 0.0418(7) Uani 1 1 d . . . . . 
N9 N 0.6286(3) 0.9713(3) 0.3847(2) 0.0396(9) Uani 1 1 d . . . . . 
H9C H 0.6386 0.9862 0.4360 0.048 Uiso 1 1 calc R U . . . 
H9D H 0.7048 0.9414 0.3441 0.048 Uiso 1 1 calc R U . . . 
Cl4 Cl -0.00878(10) 0.84822(8) 0.39416(6) 0.0305(2) Uani 1 1 d . . . . . 
N3 N 0.1181(3) 1.1297(3) 0.3908(2) 0.0336(8) Uani 1 1 d . . . . . 
H3A H 0.2091 1.1078 0.3927 0.040 Uiso 1 1 calc R U . . . 
H3B H 0.0600 1.1805 0.4250 0.040 Uiso 1 1 calc R U . . . 
O9 O -0.1756(3) 0.4711(2) 0.18552(18) 0.0404(7) Uani 1 1 d . . . . . 
C16 C -0.5417(4) 0.6801(4) 0.7035(3) 0.0513(13) Uani 1 1 d . . . . . 
H16A H -0.5314 0.6072 0.7283 0.062 Uiso 1 1 calc R U . . . 
H16B H -0.5740 0.6847 0.6481 0.062 Uiso 1 1 calc R U . . . 
Cl6 Cl 0.20552(10) 0.56646(8) 0.26345(6) 0.0385(3) Uani 1 1 d . . . . . 
O4 O -0.0657(2) 0.61569(19) 0.42181(15) 0.0283(6) Uani 1 1 d . . . . . 
C14 C -0.5556(4) 0.7785(4) 0.8235(3) 0.0489(12) Uani 1 1 d . . . . . 
H14A H -0.5701 0.7394 0.8811 0.059 Uiso 1 1 calc R U . . . 
H14B H -0.5806 0.8547 0.8344 0.059 Uiso 1 1 calc R U . . . 
C13 C -0.4029(4) 0.7427(4) 0.7702(3) 0.0451(11) Uani 1 1 d . . . . . 
H13A H -0.3545 0.8011 0.7605 0.054 Uiso 1 1 calc R U . . . 
H13B H -0.3481 0.6837 0.8014 0.054 Uiso 1 1 calc R U . . . 
C9 C -0.2685(5) 1.3693(3) 0.4993(3) 0.0415(11) Uani 1 1 d . . . . . 
H9A H -0.2771 1.4260 0.4532 0.050 Uiso 1 1 calc R U . . . 
H9B H -0.1882 1.3713 0.5252 0.050 Uiso 1 1 calc R U . . . 
C10 C -0.4075(5) 1.3824(4) 0.5700(3) 0.0512(12) Uani 1 1 d . . . . . 
H10A H -0.4123 1.4306 0.6160 0.061 Uiso 1 1 calc R U . . . 
H10B H -0.4924 1.4086 0.5447 0.061 Uiso 1 1 calc R U . . . 
C11 C -0.3960(5) 1.2717(4) 0.6060(3) 0.0503(12) Uani 1 1 d . . . . . 
H11A H -0.4924 1.2600 0.6346 0.060 Uiso 1 1 calc R U . . . 
H11B H -0.3361 1.2550 0.6496 0.060 Uiso 1 1 calc R U . . . 
C12 C -0.3259(5) 1.2067(3) 0.5255(3) 0.0461(12) Uani 1 1 d . . . . . 
H12A H -0.2615 1.1398 0.5405 0.055 Uiso 1 1 calc R U . . . 
H12B H -0.3995 1.1903 0.5006 0.055 Uiso 1 1 calc R U . . . 
C20 C -0.0531(5) 0.4971(4) 0.1268(3) 0.0487(12) Uani 1 1 d . . . . . 
H20A H -0.0390 0.5630 0.1443 0.058 Uiso 1 1 calc R U . . . 
H20B H -0.0652 0.5068 0.0655 0.058 Uiso 1 1 calc R U . . . 
C19 C 0.0703(5) 0.4091(4) 0.1329(3) 0.0581(14) Uani 1 1 d . . . . . 
H19A H 0.1585 0.4340 0.1260 0.070 Uiso 1 1 calc R U . . . 
H19B H 0.0881 0.3572 0.0872 0.070 Uiso 1 1 calc R U . . . 
C18 C 0.0254(5) 0.3625(4) 0.2247(3) 0.0628(15) Uani 1 1 d . . . . . 
H18A H 0.0297 0.2870 0.2222 0.075 Uiso 1 1 calc R U . . . 
H18B H 0.0886 0.3700 0.2621 0.075 Uiso 1 1 calc R U . . . 
C17 C -0.1253(5) 0.4236(4) 0.2603(3) 0.0480(12) Uani 1 1 d . . . . . 
H17A H -0.1854 0.3766 0.2932 0.058 Uiso 1 1 calc R U . . . 
H17B H -0.1278 0.4777 0.3006 0.058 Uiso 1 1 calc R U . . . 
C15 C -0.6445(4) 0.7553(4) 0.7677(3) 0.0588(14) Uani 1 1 d . . . . . 
H15A H -0.7219 0.7239 0.8040 0.071 Uiso 1 1 calc R U . . . 
H15B H -0.6885 0.8200 0.7371 0.071 Uiso 1 1 calc R U . . . 
  
loop_ 
 _atom_site_aniso_label 
 _atom_site_aniso_U_11 
 _atom_site_aniso_U_22 
 _atom_site_aniso_U_33 
 _atom_site_aniso_U_23 
 _atom_site_aniso_U_13 
 _atom_site_aniso_U_12 
Cu1 0.0215(2) 0.0229(2) 0.0227(2) -0.00405(19) -0.00248(17) -0.00327(18) 
C1 0.0267(18) 0.024(2) 0.0222(19) 0.0003(16) -0.0016(15) -0.0060(16) 
O1 0.0200(11) 0.0223(13) 0.0161(12) 0.0002(10) -0.0048(9) -0.0015(10) 
Cu2 0.0199(2) 0.0233(3) 0.0206(2) -0.00347(19) -0.00172(17) -0.00009(18) 
O2 0.0233(12) 0.0262(15) 0.0299(14) -0.0079(12) -0.0034(11) -0.0032(11) 
C3 0.0256(18) 0.024(2) 0.023(2) -0.0030(17) -0.0040(15) -0.0055(16) 
N2 0.0284(17) 0.036(2) 0.047(2) -0.0187(17) -0.0102(15) 0.0004(15) 
Cu3 0.0216(2) 0.0289(3) 0.0220(2) -0.0004(2) -0.00673(17) -0.00207(19) 
N6 0.0284(16) 0.0327(19) 0.0230(17) 0.0051(15) 0.0018(13) -0.0007(15) 
C2 0.0257(19) 0.030(2) 0.025(2) -0.0046(17) -0.0017(16) -0.0027(17) 
Cu4 0.0235(2) 0.0241(3) 0.0192(2) 0.00158(19) -0.00191(17) -0.00276(18) 
C8 0.033(2) 0.026(2) 0.033(2) -0.0018(18) -0.0079(18) -0.0038(17) 
O3 0.0212(12) 0.0295(15) 0.0241(13) -0.0063(11) -0.0055(10) 0.0022(11) 
N7 0.0395(18) 0.037(2) 0.0204(17) 0.0057(15) 0.0046(14) 0.0034(15) 
Cl5 0.0230(4) 0.0392(6) 0.0260(5) 0.0019(4) -0.0047(4) -0.0100(4) 
C4 0.047(2) 0.056(3) 0.041(3) 0.011(2) -0.016(2) -0.020(2) 
O6 0.0292(14) 0.0497(19) 0.0306(15) -0.0065(14) -0.0100(12) -0.0001(13) 
N5 0.0231(15) 0.039(2) 0.0348(19) -0.0149(16) -0.0099(14) 0.0058(14) 
Cl1 0.0224(4) 0.0315(5) 0.0415(6) -0.0124(5) 0.0039(4) -0.0072(4) 
C5 0.054(3) 0.081(4) 0.046(3) 0.012(3) -0.027(2) -0.026(3) 
O5 0.0323(14) 0.0428(18) 0.0340(15) 0.0032(13) -0.0157(12) -0.0089(13) 
N4 0.0319(17) 0.047(2) 0.045(2) -0.0212(19) -0.0185(16) 0.0138(16) 
Cl2 0.0279(4) 0.0435(6) 0.0228(5) -0.0089(4) -0.0064(4) 0.0021(4) 
C6 0.100(4) 0.054(3) 0.047(3) 0.007(3) -0.024(3) -0.024(3) 
O8 0.0312(14) 0.0528(19) 0.0388(17) -0.0062(15) 0.0008(12) -0.0115(14) 
N8 0.0377(18) 0.046(2) 0.034(2) -0.0096(17) -0.0151(15) -0.0017(16) 
Cl3 0.0341(5) 0.0239(5) 0.0338(5) -0.0016(4) -0.0134(4) 0.0011(4) 
C7 0.079(3) 0.043(3) 0.046(3) 0.018(2) -0.041(3) -0.018(3) 
O7 0.0528(17) 0.0360(17) 0.0309(16) -0.0075(13) 0.0020(13) -0.0110(14) 
N9 0.0298(17) 0.050(2) 0.037(2) -0.0116(17) -0.0105(15) -0.0010(16) 
Cl4 0.0369(5) 0.0341(5) 0.0196(5) -0.0039(4) -0.0016(4) -0.0117(4) 
N3 0.0304(16) 0.039(2) 0.0292(18) -0.0155(16) -0.0075(14) 0.0014(15) 
O9 0.0318(14) 0.0509(19) 0.0372(16) 0.0004(14) -0.0133(12) -0.0040(13) 
C16 0.041(2) 0.068(3) 0.048(3) -0.002(3) -0.011(2) -0.019(2) 
Cl6 0.0345(5) 0.0291(5) 0.0338(5) 0.0094(4) 0.0052(4) 0.0059(4) 
O4 0.0299(13) 0.0257(14) 0.0216(13) 0.0017(11) -0.0004(11) -0.0005(11) 
C14 0.043(2) 0.058(3) 0.043(3) -0.012(2) -0.001(2) -0.012(2) 
C13 0.037(2) 0.057(3) 0.044(3) -0.009(2) -0.014(2) -0.008(2) 
C9 0.057(3) 0.030(2) 0.033(2) -0.0055(19) -0.001(2) -0.010(2) 
C10 0.054(3) 0.044(3) 0.044(3) -0.011(2) -0.008(2) 0.007(2) 
C11 0.038(2) 0.062(3) 0.042(3) 0.001(2) 0.002(2) -0.010(2) 
C12 0.047(2) 0.037(3) 0.054(3) 0.004(2) -0.008(2) -0.016(2) 
C20 0.047(2) 0.053(3) 0.037(3) 0.006(2) -0.009(2) -0.002(2) 
C19 0.043(3) 0.056(3) 0.066(3) 0.003(3) -0.007(2) -0.005(2) 
C18 0.045(3) 0.069(4) 0.073(4) 0.030(3) -0.027(3) -0.011(3) 
C17 0.054(3) 0.056(3) 0.040(3) 0.011(2) -0.015(2) -0.024(2) 
C15 0.028(2) 0.068(4) 0.076(4) -0.023(3) -0.007(2) -0.004(2) 
  
_geom_special_details 
; 
 All esds (except the esd in the dihedral angle between two l.s. planes) 
 are estimated using the full covariance matrix.  The cell esds are taken 
 into account individually in the estimation of esds in distances, angles 
 and torsion angles; correlations between esds in cell parameters are only 
 used when they are defined by crystal symmetry.  An approximate (isotropic) 
 treatment of cell esds is used for estimating esds involving l.s. planes. 
; 
  
loop_ 
 _geom_bond_atom_site_label_1 
 _geom_bond_atom_site_label_2 
 _geom_bond_distance 
 _geom_bond_site_symmetry_2 
 _geom_bond_publ_flag 
Cu1 O1 1.900(2) . ? 
Cu1 O2 1.912(2) . ? 
Cu1 Cl1 2.3538(12) . ? 
Cu1 Cl4 2.3622(12) . ? 
Cu1 Cl3 2.4871(13) . ? 
C1 O2 1.277(4) . ? 
C1 N2 1.312(5) . ? 
C1 N3 1.314(5) . ? 
O1 Cu2 1.885(2) . ? 
O1 Cu3 1.891(2) . ? 
O1 Cu4 1.907(2) . ? 
Cu2 O3 1.915(2) . ? 
Cu2 Cl6 2.3681(13) . ? 
Cu2 Cl2 2.4175(12) . ? 
Cu2 Cl1 2.4297(11) . ? 
C3 O4 1.266(4) . ? 
C3 N7 1.319(5) . ? 
C3 N6 1.327(5) . ? 
Cu3 O5 1.942(3) . ? 
Cu3 Cl2 2.3607(14) . ? 
Cu3 Cl3 2.3642(11) . ? 
Cu3 Cl5 2.4364(12) . ? 
C2 O3 1.257(4) . ? 
C2 N4 1.328(5) . ? 
C2 N5 1.334(5) . ? 
Cu4 O4 1.933(2) . ? 
Cu4 Cl6 2.3649(14) . ? 
Cu4 Cl4 2.3880(12) . ? 
Cu4 Cl5 2.4240(12) . ? 
C8 O6 1.239(4) . ? 
C8 N9 1.335(5) . ? 
C8 N8 1.347(5) . ? 
C4 O5 1.407(5) . ? 
C4 C5 1.518(6) . ? 
C5 C6 1.499(6) . ? 
O5 C7 1.497(5) . ? 
C6 C7 1.470(6) . ? 
O8 C16 1.413(4) . ? 
O8 C13 1.429(5) . ? 
O7 C9 1.421(4) . ? 
O7 C12 1.446(4) . ? 
O9 C17 1.416(5) . ? 
O9 C20 1.421(5) . ? 
C16 C15 1.471(6) . ? 
C14 C15 1.494(6) . ? 
C14 C13 1.503(5) . ? 
C9 C10 1.509(5) . ? 
C10 C11 1.499(6) . ? 
C11 C12 1.500(6) . ? 
C20 C19 1.464(6) . ? 
C19 C18 1.510(7) . ? 
C18 C17 1.488(6) . ? 
  
loop_ 
 _geom_angle_atom_site_label_1 
 _geom_angle_atom_site_label_2 
 _geom_angle_atom_site_label_3 
 _geom_angle 
 _geom_angle_site_symmetry_1 
 _geom_angle_site_symmetry_3 
 _geom_angle_publ_flag 
O1 Cu1 O2 174.84(11) . . ? 
O1 Cu1 Cl1 85.48(7) . . ? 
O2 Cu1 Cl1 91.05(7) . . ? 
O1 Cu1 Cl4 85.29(7) . . ? 
O2 Cu1 Cl4 94.33(8) . . ? 
Cl1 Cu1 Cl4 132.92(5) . . ? 
O1 Cu1 Cl3 83.51(8) . . ? 
O2 Cu1 Cl3 101.49(9) . . ? 
Cl1 Cu1 Cl3 117.12(4) . . ? 
Cl4 Cu1 Cl3 107.48(4) . . ? 
O2 C1 N2 122.4(3) . . ? 
O2 C1 N3 118.8(3) . . ? 
N2 C1 N3 118.7(3) . . ? 
Cu2 O1 Cu3 108.99(11) . . ? 
Cu2 O1 Cu1 109.71(10) . . ? 
Cu3 O1 Cu1 109.64(12) . . ? 
Cu2 O1 Cu4 109.95(12) . . ? 
Cu3 O1 Cu4 110.03(10) . . ? 
Cu1 O1 Cu4 108.51(11) . . ? 
O1 Cu2 O3 178.58(11) . . ? 
O1 Cu2 Cl6 84.19(8) . . ? 
O3 Cu2 Cl6 94.42(9) . . ? 
O1 Cu2 Cl2 84.73(8) . . ? 
O3 Cu2 Cl2 96.25(8) . . ? 
Cl6 Cu2 Cl2 121.57(4) . . ? 
O1 Cu2 Cl1 83.66(7) . . ? 
O3 Cu2 Cl1 96.87(8) . . ? 
Cl6 Cu2 Cl1 122.47(5) . . ? 
Cl2 Cu2 Cl1 112.91(5) . . ? 
C1 O2 Cu1 125.4(2) . . ? 
O4 C3 N7 119.4(3) . . ? 
O4 C3 N6 122.6(3) . . ? 
N7 C3 N6 118.0(3) . . ? 
O1 Cu3 O5 177.92(10) . . ? 
O1 Cu3 Cl2 86.22(7) . . ? 
O5 Cu3 Cl2 95.86(8) . . ? 
O1 Cu3 Cl3 87.19(8) . . ? 
O5 Cu3 Cl3 91.77(9) . . ? 
Cl2 Cu3 Cl3 124.96(4) . . ? 
O1 Cu3 Cl5 85.13(7) . . ? 
O5 Cu3 Cl5 93.56(8) . . ? 
Cl2 Cu3 Cl5 122.72(4) . . ? 
Cl3 Cu3 Cl5 111.00(4) . . ? 
O3 C2 N4 120.0(4) . . ? 
O3 C2 N5 123.0(3) . . ? 
N4 C2 N5 117.0(4) . . ? 
O1 Cu4 O4 176.04(10) . . ? 
O1 Cu4 Cl6 83.81(8) . . ? 
O4 Cu4 Cl6 92.60(8) . . ? 
O1 Cu4 Cl4 84.41(7) . . ? 
O4 Cu4 Cl4 96.26(8) . . ? 
Cl6 Cu4 Cl4 123.89(4) . . ? 
O1 Cu4 Cl5 85.14(8) . . ? 
O4 Cu4 Cl5 98.28(8) . . ? 
Cl6 Cu4 Cl5 123.84(4) . . ? 
Cl4 Cu4 Cl5 109.44(5) . . ? 
O6 C8 N9 121.3(4) . . ? 
O6 C8 N8 120.9(4) . . ? 
N9 C8 N8 117.7(3) . . ? 
C2 O3 Cu2 125.0(2) . . ? 
Cu4 Cl5 Cu3 79.60(4) . . ? 
O5 C4 C5 104.8(4) . . ? 
Cu1 Cl1 Cu2 80.60(4) . . ? 
C6 C5 C4 101.8(4) . . ? 
C4 O5 C7 109.9(3) . . ? 
C4 O5 Cu3 120.0(3) . . ? 
C7 O5 Cu3 118.2(2) . . ? 
Cu3 Cl2 Cu2 80.06(4) . . ? 
C7 C6 C5 104.2(4) . . ? 
C16 O8 C13 106.5(3) . . ? 
Cu3 Cl3 Cu1 79.33(4) . . ? 
C6 C7 O5 104.0(3) . . ? 
C9 O7 C12 109.0(3) . . ? 
Cu1 Cl4 Cu4 81.13(4) . . ? 
C17 O9 C20 104.2(3) . . ? 
O8 C16 C15 104.9(4) . . ? 
Cu4 Cl6 Cu2 81.99(5) . . ? 
C3 O4 Cu4 127.9(2) . . ? 
C15 C14 C13 104.5(3) . . ? 
O8 C13 C14 106.5(3) . . ? 
O7 C9 C10 105.7(3) . . ? 
C11 C10 C9 101.0(3) . . ? 
C10 C11 C12 103.5(4) . . ? 
O7 C12 C11 105.8(3) . . ? 
O9 C20 C19 106.4(4) . . ? 
C20 C19 C18 103.6(4) . . ? 
C17 C18 C19 104.9(4) . . ? 
O9 C17 C18 105.7(4) . . ? 
C16 C15 C14 104.4(4) . . ? 
  
_refine_diff_density_max    0.890 
_refine_diff_density_min   -0.528 
_refine_diff_density_rms    0.095 
  
_shelx_res_file 
; 
  
    schindler14016.res created by SHELXL-2014/7 
  
  
TITL schindler14016 in P-1 
CELL 0.71073   9.9240  13.1940  15.6520  84.352  74.979  74.683 
ZERR   2.00   0.0020   0.0026   0.0031   0.030   0.030   0.030 
LATT  1 
SFAC C H N O CL CU 
UNIT 40 96 16 18 12 8 
  
OMIT   0   0   1 
OMIT 0   1   0 
OMIT 1   0   1 
REM little crystal sprouts 
OMIT 0 1 1 
OMIT 0 -1 1 
OMIT 1 0 0 
  
LIST 4 ! automatically inserted. Change 6 to 4 for CHECKCIF!! 
SHEL 99999 0.84 
L.S. 4 
BOND 
FMAP 2 
PLAN 5 
ACTA 
SIZE 0.3x0.175x0.05 
TEMP -123.15 
  
WGHT    0.036300 
FVAR       0.38491 
MOLE   1 
CU1   6    0.103972    0.898386    0.249825    11.00000    0.02153    0.02292 = 
         0.02271   -0.00405   -0.00248   -0.00327 
C1    1    0.069011    1.086637    0.336884    11.00000    0.02673    0.02372 = 
         0.02220    0.00034   -0.00157   -0.00599 
O1    4    0.068297    0.776419    0.214092    11.00000    0.01996    0.02229 = 
         0.01612    0.00024   -0.00479   -0.00153 
CU2   6    0.240854    0.692814    0.146914    11.00000    0.01995    0.02328 = 
         0.02064   -0.00347   -0.00172   -0.00009 
O2    4    0.155537    1.013163    0.287902    11.00000    0.02334    0.02622 = 
         0.02992   -0.00794   -0.00336   -0.00319 
C3    1   -0.162303    0.645673    0.491284    11.00000    0.02559    0.02441 = 
         0.02340   -0.00296   -0.00402   -0.00550 
N2    3   -0.066109    1.122839    0.333548    11.00000    0.02844    0.03646 = 
         0.04727   -0.01868   -0.01016    0.00035 
AFIX  93 
H2C   2   -0.100107    1.096374    0.296552    11.00000   -1.20000 
H2D   2   -0.122723    1.173580    0.368307    11.00000   -1.20000 
AFIX   0 
CU3   6   -0.067514    0.816364    0.143997    11.00000    0.02158    0.02894 = 
         0.02201   -0.00036   -0.00673   -0.00207 
N6    3   -0.269548    0.730924    0.492309    11.00000    0.02840    0.03273 = 
         0.02300    0.00512    0.00181   -0.00071 
AFIX  93 
H6C   2   -0.275429    0.769044    0.443394    11.00000   -1.20000 
H6D   2   -0.334798    0.749346    0.541904    11.00000   -1.20000 
AFIX   0 
C2    1    0.527062    0.566773    0.109739    11.00000    0.02574    0.03011 = 
         0.02480   -0.00461   -0.00165   -0.00273 
CU4   6   -0.004940    0.699354    0.317430    11.00000    0.02352    0.02409 = 
         0.01922    0.00158   -0.00191   -0.00276 
C8    1    0.497944    0.993986    0.368653    11.00000    0.03312    0.02609 = 
         0.03309   -0.00180   -0.00794   -0.00379 
O3    4    0.416446    0.605439    0.081095    11.00000    0.02118    0.02951 = 
         0.02414   -0.00634   -0.00553    0.00217 
N7    3   -0.159233    0.589622    0.565617    11.00000    0.03954    0.03690 = 
         0.02039    0.00573    0.00461    0.00339 
AFIX  93 
H7C   2   -0.090431    0.531935    0.566621    11.00000   -1.20000 
H7D   2   -0.225985    0.609902    0.614223    11.00000   -1.20000 
AFIX   0 
CL5   5   -0.220474    0.734290    0.262622    11.00000    0.02303    0.03917 = 
         0.02598    0.00190   -0.00467   -0.00998 
C4    1   -0.280626    0.786226    0.057794    11.00000    0.04743    0.05610 = 
         0.04099    0.01117   -0.01600   -0.01955 
AFIX  23 
H4A   2   -0.360434    0.777419    0.108764    11.00000   -1.20000 
H4B   2   -0.211370    0.717030    0.044731    11.00000   -1.20000 
AFIX   0 
O6    4    0.388888    1.036086    0.424727    11.00000    0.02924    0.04970 = 
         0.03058   -0.00652   -0.01004   -0.00013 
N5    3    0.550573    0.603314    0.179635    11.00000    0.02308    0.03879 = 
         0.03479   -0.01495   -0.00991    0.00576 
AFIX  93 
H5C   2    0.487090    0.656887    0.207932    11.00000   -1.20000 
H5D   2    0.629568    0.573849    0.197450    11.00000   -1.20000 
AFIX   0 
CL1   5    0.337324    0.840546    0.158976    11.00000    0.02238    0.03150 = 
         0.04154   -0.01243    0.00392   -0.00717 
C5    1   -0.337489    0.832377   -0.022538    11.00000    0.05433    0.08069 = 
         0.04644    0.01215   -0.02707   -0.02591 
AFIX  23 
H5A   2   -0.345039    0.776682   -0.057776    11.00000   -1.20000 
H5B   2   -0.432725    0.882822   -0.005219    11.00000   -1.20000 
AFIX   0 
O5    4   -0.212199    0.859708    0.075752    11.00000    0.03234    0.04285 = 
         0.03402    0.00321   -0.01569   -0.00891 
N4    3    0.625831    0.484559    0.070990    11.00000    0.03186    0.04720 = 
         0.04498   -0.02124   -0.01849    0.01378 
AFIX  93 
H4C   2    0.613822    0.457176    0.025282    11.00000   -1.20000 
H4D   2    0.703265    0.457483    0.091031    11.00000   -1.20000 
AFIX   0 
CL2   5    0.113370    0.719383    0.031018    11.00000    0.02794    0.04353 = 
         0.02280   -0.00891   -0.00639    0.00215 
C6    1   -0.224080    0.886582   -0.072262    11.00000    0.10007    0.05365 = 
         0.04717    0.00684   -0.02406   -0.02398 
AFIX  23 
H6A   2   -0.139509    0.835803   -0.106432    11.00000   -1.20000 
H6B   2   -0.262331    0.941963   -0.113397    11.00000   -1.20000 
AFIX   0 
O8    4   -0.410373    0.709751    0.687605    11.00000    0.03124    0.05282 = 
         0.03876   -0.00624    0.00080   -0.01145 
N8    3    0.488683    0.971241    0.288672    11.00000    0.03773    0.04645 = 
         0.03416   -0.00958   -0.01510   -0.00166 
AFIX  93 
H8C   2    0.404351    0.986277    0.275623    11.00000   -1.20000 
H8D   2    0.566963    0.941344    0.249461    11.00000   -1.20000 
AFIX   0 
CL3   5   -0.089392    0.992388    0.175584    11.00000    0.03407    0.02391 = 
         0.03377   -0.00164   -0.01342    0.00107 
C7    1   -0.185504    0.932531   -0.002897    11.00000    0.07931    0.04260 = 
         0.04553    0.01819   -0.04107   -0.01831 
AFIX  23 
H7A   2   -0.246671    1.004515    0.009817    11.00000   -1.20000 
H7B   2   -0.083178    0.935165   -0.020599    11.00000   -1.20000 
AFIX   0 
O7    4   -0.244322    1.269729    0.462955    11.00000    0.05284    0.03600 = 
         0.03095   -0.00746    0.00204   -0.01105 
N9    3    0.628613    0.971270    0.384715    11.00000    0.02983    0.05017 = 
         0.03714   -0.01162   -0.01050   -0.00103 
AFIX  93 
H9C   2    0.638567    0.986201    0.435961    11.00000   -1.20000 
H9D   2    0.704763    0.941370    0.344052    11.00000   -1.20000 
AFIX   0 
CL4   5   -0.008777    0.848223    0.394155    11.00000    0.03695    0.03415 = 
         0.01959   -0.00391   -0.00156   -0.01165 
N3    3    0.118113    1.129721    0.390797    11.00000    0.03037    0.03861 = 
         0.02922   -0.01552   -0.00755    0.00139 
AFIX  93 
H3A   2    0.209131    1.107836    0.392672    11.00000   -1.20000 
H3B   2    0.059979    1.180459    0.425030    11.00000   -1.20000 
AFIX   0 
O9    4   -0.175561    0.471110    0.185518    11.00000    0.03178    0.05093 = 
         0.03715    0.00039   -0.01334   -0.00397 
C16   1   -0.541746    0.680076    0.703510    11.00000    0.04106    0.06774 = 
         0.04799   -0.00224   -0.01052   -0.01867 
AFIX  23 
H16A  2   -0.531357    0.607220    0.728292    11.00000   -1.20000 
H16B  2   -0.573968    0.684749    0.648132    11.00000   -1.20000 
AFIX   0 
CL6   5    0.205517    0.566461    0.263446    11.00000    0.03451    0.02909 = 
         0.03375    0.00945    0.00522    0.00590 
O4    4   -0.065688    0.615694    0.421806    11.00000    0.02989    0.02572 = 
         0.02162    0.00173   -0.00041   -0.00049 
C14   1   -0.555599    0.778508    0.823516    11.00000    0.04292    0.05779 = 
         0.04266   -0.01173   -0.00107   -0.01218 
AFIX  23 
H14A  2   -0.570105    0.739355    0.881091    11.00000   -1.20000 
H14B  2   -0.580639    0.854650    0.834432    11.00000   -1.20000 
AFIX   0 
C13   1   -0.402893    0.742730    0.770168    11.00000    0.03682    0.05670 = 
         0.04376   -0.00911   -0.01388   -0.00840 
AFIX  23 
H13A  2   -0.354537    0.801066    0.760462    11.00000   -1.20000 
H13B  2   -0.348120    0.683700    0.801397    11.00000   -1.20000 
AFIX   0 
C9    1   -0.268484    1.369334    0.499331    11.00000    0.05655    0.02966 = 
         0.03308   -0.00548   -0.00081   -0.00997 
AFIX  23 
H9A   2   -0.277105    1.425986    0.453165    11.00000   -1.20000 
H9B   2   -0.188188    1.371310    0.525210    11.00000   -1.20000 
AFIX   0 
C10   1   -0.407467    1.382445    0.570044    11.00000    0.05393    0.04431 = 
         0.04422   -0.01062   -0.00818    0.00672 
AFIX  23 
H10A  2   -0.412299    1.430627    0.616010    11.00000   -1.20000 
H10B  2   -0.492386    1.408556    0.544652    11.00000   -1.20000 
AFIX   0 
C11   1   -0.396045    1.271711    0.606026    11.00000    0.03819    0.06238 = 
         0.04210    0.00081    0.00158   -0.01038 
AFIX  23 
H11A  2   -0.492384    1.260044    0.634556    11.00000   -1.20000 
H11B  2   -0.336051    1.255048    0.649613    11.00000   -1.20000 
AFIX   0 
C12   1   -0.325892    1.206670    0.525518    11.00000    0.04688    0.03734 = 
         0.05359    0.00410   -0.00817   -0.01553 
AFIX  23 
H12A  2   -0.261511    1.139841    0.540510    11.00000   -1.20000 
H12B  2   -0.399509    1.190323    0.500588    11.00000   -1.20000 
AFIX   0 
C20   1   -0.053070    0.497102    0.126827    11.00000    0.04728    0.05323 = 
         0.03688    0.00611   -0.00869   -0.00172 
AFIX  23 
H20A  2   -0.039032    0.562968    0.144313    11.00000   -1.20000 
H20B  2   -0.065240    0.506796    0.065500    11.00000   -1.20000 
AFIX   0 
C19   1    0.070315    0.409138    0.132924    11.00000    0.04279    0.05629 = 
         0.06647    0.00295   -0.00741   -0.00488 
AFIX  23 
H19A  2    0.158451    0.434010    0.126026    11.00000   -1.20000 
H19B  2    0.088099    0.357154    0.087237    11.00000   -1.20000 
AFIX   0 
C18   1    0.025372    0.362476    0.224721    11.00000    0.04454    0.06913 = 
         0.07345    0.02970   -0.02665   -0.01150 
AFIX  23 
H18A  2    0.029671    0.286973    0.222214    11.00000   -1.20000 
H18B  2    0.088599    0.369993    0.262086    11.00000   -1.20000 
AFIX   0 
C17   1   -0.125269    0.423574    0.260271    11.00000    0.05407    0.05566 = 
         0.03969    0.01143   -0.01521   -0.02399 
AFIX  23 
H17A  2   -0.185449    0.376564    0.293184    11.00000   -1.20000 
H17B  2   -0.127821    0.477723    0.300584    11.00000   -1.20000 
AFIX   0 
C15   1   -0.644485    0.755262    0.767654    11.00000    0.02849    0.06809 = 
         0.07610   -0.02252   -0.00716   -0.00352 
AFIX  23 
H15A  2   -0.721861    0.723897    0.804043    11.00000   -1.20000 
H15B  2   -0.688528    0.820013    0.737110    11.00000   -1.20000 
AFIX   0 
HKLF 4 
  
REM  schindler14016 in P-1 
REM R1 =  0.0332 for    4938 Fo > 4sig(Fo)  and  0.0564 for all    6726 data 
REM    424 parameters refined using      0 restraints 
  
END 
  
WGHT      0.0363      0.0000 
  
REM Highest difference peak  0.890,  deepest hole -0.528,  1-sigma level  0.095 
Q1    1  -0.3682  0.9261 -0.0045  11.00000  0.05    0.89 
Q2    1  -0.2483  0.8837  0.0194  11.00000  0.05    0.60 
Q3    1  -0.5848  0.7549  0.6984  11.00000  0.05    0.42 
Q4    1  -0.4117  0.9812 -0.0432  11.00000  0.05    0.41 
Q5    1  -0.0822  0.3623  0.2158  11.00000  0.05    0.35 
; 
_shelx_res_checksum   37741 
  
_shelx_hkl_file 
; 
  -1   0   0 1389.24  109.62 
   1   0   0 1588.08  112.10 
  -2   0   0  519.05   37.38 
  -2   0   0  545.60   35.61 
  -2   0   0  496.72   24.93 
   2   0   0  500.99   34.70 
   2   0   0  492.53   34.61 
   2   0   0  533.18   25.59 
   2   0   0  543.56   35.36 
  -2   0   0  584.01   63.81 
   2   0   0  534.38   59.52 
  -3   0   0   47.65    8.81 
  -3   0   0   32.58    6.87 
  -3   0   0   35.29    2.37 
   3   0   0   56.29    6.33 
   3   0   0   46.03    8.98 
   3   0   0   42.21    7.01 
   3   0   0   43.13    2.50 
  -3   0   0   29.05   19.70 
   3   0   0   14.14   22.19 
  -4   0   0    0.55    8.92 
  -4   0   0   10.81    9.81 
  -4   0   0    1.71    1.50 
   4   0   0  -13.61    8.74 
   4   0   0   -7.38    8.63 
   4   0   0    6.38    1.72 
   4   0   0   -6.11    6.03 
  -4   0   0   51.31   36.88 
   4   0   0   18.31   26.77 
  -5   0   0   35.89    2.41 
  -5   0   0   47.19   12.01 
  -5   0   0   37.43   12.29 
   5   0   0   34.08    2.53 
   5   0   0   42.00    8.34 
   5   0   0   30.56   10.19 
  -5   0   0    5.86   43.62 
   5   0   0  -17.72   33.90 
  -6   0   0  746.52   67.43 
  -6   0   0  767.89   34.62 
  -6   0   0  738.79   65.63 
   6   0   0  687.54   58.18 
   6   0   0  773.34   40.56 
   6   0   0  760.46   54.55 
   6   0   0  751.44   57.01 
  -6   0   0  410.30   81.52 
   6   0   0  546.98   75.47 
  -7   0   0  504.67  307.02 
  -7   0   0  460.03   49.28 
  -7   0   0  398.86   20.01 
   7   0   0  454.67   36.86 
   7   0   0  406.20   37.60 
   7   0   0  456.11   34.59 
   7   0   0  401.12   21.60 
  -7   0   0  209.47   72.34 
   7   0   0  342.53   66.96 
  -8   0   0  130.79   21.94 
  -8   0   0  161.50    7.93 
  -8   0   0  118.88   21.10 
   8   0   0  109.38   18.71 
   8   0   0  157.25    9.24 
   8   0   0  160.42   16.56 
   8   0   0  165.27   19.55 
  -8   0   0  168.26   71.34 
   8   0   0  235.88   70.25 
  -9   0   0  376.85   42.68 
  -9   0   0  422.85   28.21 
  -9   0   0  369.17   19.52 
  -9   0   0  375.98   44.18 
   9   0   0  383.11   31.31 
   9   0   0  378.65   40.11 
   9   0   0  365.91   25.02 
   9   0   0  392.60   40.05 
  -9   0   0  352.12   99.42 
   9   0   0  333.65   85.27 
 -10   0   0   51.57   16.01 
 -10   0   0   54.01   23.55 
 -10   0   0   70.92    6.33 
  10   0   0   55.20    5.45 
  10   0   0   33.04   17.86 
  10   0   0   73.89   18.41 
  10   0   0   61.47   17.52 
 -10   0   0  -80.19   90.63 
  10   0   0   38.48   76.77 
 -11   0   0   23.37    5.43 
  11   0   0   13.34   18.44 
  11   0   0   17.09   18.93 
  11   0   0   -0.11    4.91 
 -12   0   0  102.99   18.28 
  12   0   0  100.35   21.35 
  12   0   0  136.95   24.44 
  11  -1   0    5.29   14.25 
  11  -1   0   16.78    3.74 
  11  -1   0   24.52   20.50 
 -11   1   0   29.44    5.71 
  10  -1   0    4.65    3.72 
  10  -1   0   18.16   18.41 
  10  -1   0   -0.61   15.89 
  10  -1   0   -1.39   17.51 
 -10   1   0   15.75   25.80 
 -10   1   0   -2.57   21.73 
  10  -1   0    5.31   94.44 
 -10   1   0  -23.56   85.82 
   9  -1   0   17.93   16.04 
   9  -1   0   20.79    3.71 
   9  -1   0    8.03   13.69 
   9  -1   0   -4.37   14.57 
  -9   1   0   23.05   21.27 
  -9   1   0   19.96   19.69 
   9  -1   0   -8.79   79.55 
  -9   1   0   -3.55   89.28 
   8  -1   0  259.01   25.79 
   8  -1   0  243.17   26.26 
   8  -1   0  241.66   15.65 
   8  -1   0  281.54   23.38 
  -8   1   0  218.19   27.32 
  -8   1   0  247.84   29.16 
   8  -1   0  291.55   81.42 
  -8   1   0  158.93   80.93 
   7  -1   0   84.94   12.58 
   7  -1   0   48.95   11.89 
   7  -1   0   57.08    4.31 
   7  -1   0   67.30   15.53 
  -7   1   0   64.73   18.32 
  -7   1   0   58.57   13.93 
   7  -1   0   72.96   60.07 
  -7   1   0  -38.75   44.80 
   6  -1   0  179.40   18.51 
   6  -1   0  150.91    9.46 
   6  -1   0  164.65   17.35 
   6  -1   0  145.64   14.83 
  -6   1   0  136.75   21.02 
  -6   1   0  168.18    7.73 
  -6   1   0  119.13   19.83 
   6  -1   0  214.59   55.03 
  -6   1   0   65.47   57.76 
   5  -1   0  474.68   35.60 
   5  -1   0  464.61   34.30 
   5  -1   0  479.16   24.27 
   5  -1   0  493.07   32.90 
  -5   1   0  481.25   22.66 
  -5   1   0  460.13   45.48 
  -5   1   0  483.83   35.49 
   5  -1   0  424.48   71.33 
  -5   1   0  533.57   79.60 
   4  -1   0  516.57   23.81 
   4  -1   0  520.51   34.86 
   4  -1   0  423.83   36.55 
   4  -1   0  524.34   34.51 
  -4   1   0  472.64   23.88 
  -4   1   0  439.66   40.38 
  -4   1   0  490.48   33.57 
   4  -1   0  433.06   59.94 
  -4   1   0  468.34   70.39 
   3  -1   0  296.62   21.28 
   3  -1   0  286.06   15.72 
   3  -1   0  325.20   23.40 
  -3   1   0  277.07   23.14 
  -3   1   0  325.72   23.09 
  -3   1   0  291.70   14.57 
   3  -1   0  178.44   43.49 
  -3   1   0  306.80   42.02 
   2  -1   0  993.28   72.40 
   2  -1   0 1037.51   64.10 
   2  -1   0 1025.57   51.15 
  -2   1   0  997.88   75.21 
  -2   1   0  995.92   51.21 
  -2   1   0 1020.40   79.40 
   2  -1   0 1147.98  124.99 
  -2   1   0 1095.91  127.44 
   1  -1   0   -0.35    3.39 
   1  -1   0   -1.62    4.84 
  -1   1   0    1.96    3.11 
  -1   1   0    7.58    5.31 
   1  -1   0   16.31   11.65 
  -1   1   0   18.36   15.38 
   0   1   0    7.44    2.12 
   0  -1   0  -12.89    6.60 
   0   1   0    8.26    5.77 
   0   1   0   -7.59    6.79 
   1   1   0  264.13   19.22 
  -1  -1   0 1029.31  106.51 
  -2  -1   0   35.08   16.44 
  -2  -1   0    8.74    3.97 
   2   1   0    1.08    2.47 
   2   1   0    7.22    4.01 
   2   1   0    3.74    1.17 
  -2  -1   0   -5.22   11.81 
   2   1   0   20.00   10.20 
  -3  -1   0    3.62    6.02 
  -3  -1   0    6.68    1.47 
  -3  -1   0   10.18    6.31 
   3   1   0    4.93    1.54 
   3   1   0    8.00    3.73 
   3   1   0   22.22    5.93 
  -3  -1   0    3.24   17.24 
   3   1   0   27.28   17.01 
  -4  -1   0 1104.24   70.50 
  -4  -1   0 1124.88   71.36 
  -4  -1   0 1114.00   52.00 
   4   1   0 1147.14   54.69 
   4   1   0  999.75   70.36 
   4   1   0 1113.68   71.60 
   4   1   0 1069.60   74.34 
  -4  -1   0 1086.77  119.84 
   4   1   0 1107.43  117.57 
  -5  -1   0 2135.68  159.65 
  -5  -1   0 2239.56  102.95 
  -5  -1   0 2168.91  169.48 
   5   1   0 2090.99  147.84 
   5   1   0 2411.86  166.46 
   5   1   0 2218.27  168.55 
   5   1   0 2239.13  106.30 
  -5  -1   0 2153.81  282.39 
   5   1   0 2190.82  229.96 
  -6  -1   0  615.46   54.85 
  -6  -1   0  650.53   45.54 
  -6  -1   0  673.50   31.04 
   6   1   0  645.16   43.99 
   6   1   0  708.73   48.91 
   6   1   0  753.43   44.13 
   6   1   0  689.22   34.96 
  -6  -1   0  598.36   95.33 
   6   1   0  722.53   85.83 
  -7  -1   0 1105.12   51.72 
  -7  -1   0 1120.76  109.47 
  -7  -1   0 1085.19   61.54 
  -7  -1   0 1106.56   96.18 
   7   1   0 1176.08   84.79 
   7   1   0 1227.87   81.05 
   7   1   0 1166.27   66.44 
   7   1   0 1064.74   90.39 
  -7  -1   0  928.08  137.33 
   7   1   0 1132.91  126.66 
  -8  -1   0  177.75    9.91 
  -8  -1   0  239.19   13.10 
  -8  -1   0  180.28   22.81 
  -8  -1   0  244.91   21.81 
   8   1   0  169.94   19.72 
   8   1   0  227.36   19.36 
   8   1   0  213.35   21.13 
   8   1   0  237.08   15.78 
  -8  -1   0  167.34   54.90 
   8   1   0  202.52   58.80 
  -9  -1   0   97.42   19.19 
  -9  -1   0   63.27   53.28 
  -9  -1   0   75.63    6.07 
  -9  -1   0   71.19    5.10 
   9   1   0   28.94   14.57 
   9   1   0  102.61   16.77 
   9   1   0   40.75   13.96 
   9   1   0   66.43    4.88 
  -9  -1   0  -12.81   65.81 
   9   1   0   35.67   56.77 
 -10  -1   0  208.87   12.08 
 -10  -1   0  107.35   24.40 
 -10  -1   0  162.91   13.98 
 -10  -1   0  174.82   26.35 
  10   1   0  180.60   25.89 
  10   1   0  204.51   23.62 
  10   1   0  184.47   14.61 
  10   1   0  200.91   22.54 
 -10  -1   0  131.67   65.85 
  10   1   0   99.32   65.55 
 -11  -1   0    0.50    4.87 
 -11  -1   0   -9.34   23.62 
  11   1   0    9.54   10.81 
  11   1   0   -2.48   14.98 
  11   1   0  -15.91   17.68 
 -12  -1   0   63.65    7.64 
  12   1   0   68.86   19.86 
  12   1   0   47.71   23.59 
  11  -2   0    5.59   23.08 
  11  -2   0   -9.10   20.04 
  10  -2   0  -14.27   11.05 
  10  -2   0   12.43   21.00 
  10  -2   0   10.87    3.74 
 -10   2   0   34.63   17.58 
  10  -2   0   61.89   74.26 
   9  -2   0  137.11   11.60 
   9  -2   0  167.03   20.61 
   9  -2   0  169.94   22.10 
   9  -2   0  146.08   24.28 
  -9   2   0  198.29   39.45 
  -9   2   0  178.75   24.39 
   9  -2   0   50.91   90.45 
  -9   2   0  230.34   91.02 
   8  -2   0   29.43   17.23 
   8  -2   0   45.32   13.58 
   8  -2   0   18.74    3.24 
   8  -2   0   34.26    9.85 
  -8   2   0    9.77   15.11 
  -8   2   0    7.67   19.36 
   8  -2   0   38.36   55.68 
  -8   2   0   26.36   81.82 
   7  -2   0  109.37   20.98 
   7  -2   0  144.75   15.61 
   7  -2   0  152.66   21.10 
   7  -2   0  134.42    7.06 
  -7   2   0  102.87   22.73 
  -7   2   0  134.98   22.77 
   7  -2   0  164.52   69.19 
  -7   2   0  115.14   75.18 
   6  -2   0  791.32   50.14 
   6  -2   0  727.64   48.84 
   6  -2   0  737.61   53.47 
   6  -2   0  699.40   34.03 
  -6   2   0  667.86   50.39 
  -6   2   0  725.70   51.52 
   6  -2   0  790.75  107.29 
  -6   2   0  852.58  109.79 
   5  -2   0   22.38   13.22 
   5  -2   0   27.65    2.39 
   5  -2   0   32.62   10.74 
   5  -2   0   26.23    8.43 
  -5   2   0   23.31   11.01 
  -5   2   0   62.26   16.18 
   5  -2   0   13.66   32.98 
  -5   2   0   16.80   52.10 
   4  -2   0 2467.07  192.04 
   4  -2   0 2713.01  162.44 
   4  -2   0 2756.07  124.99 
  -4   2   0 2456.90  169.51 
  -4   2   0 2874.86  189.35 
   4  -2   0 2553.99  267.53 
  -4   2   0 2530.10  268.52 
   3  -2   0 3858.92  200.06 
   3  -2   0 3782.47  237.35 
   3  -2   0 4032.84  268.26 
  -3   2   0 4002.10  268.20 
  -3   2   0 3887.31  258.96 
   3  -2   0 4016.91  429.59 
  -3   2   0 4304.66  438.91 
   2  -2   0   84.96   12.47 
   2  -2   0   82.33   12.40 
   2  -2   0   82.20    4.31 
  -2   2   0   82.24   12.65 
  -2   2   0   82.83   11.44 
   2  -2   0   32.08   35.71 
  -2   2   0  135.13   35.11 
   1  -2   0  221.95   15.35 
   1  -2   0  200.19   15.03 
  -1   2   0  191.73   15.61 
  -1   2   0  179.32   15.37 
   1  -2   0  170.26   29.03 
  -1   2   0  223.19   30.29 
   0  -2   0 2274.38  130.19 
   0  -2   0 2356.49  168.17 
   0  -2   0 2290.84  161.40 
   0   2   0 2328.39  143.35 
   0   2   0 1978.59  177.29 
   0   2   0 2270.71  153.00 
   0  -2   0 2456.17  256.61 
   0   2   0 2188.69  248.82 
   0   2   0 2522.09  276.98 
  -1  -2   0 1933.54  123.91 
  -1  -2   0 1969.93  158.82 
  -1  -2   0 1986.75  108.40 
   1   2   0 1857.43  125.36 
   1   2   0 1956.26  141.76 
  -1  -2   0 1902.90  203.77 
   1   2   0 2122.25  211.05 
  -2  -2   0  152.39   10.86 
  -2  -2   0  166.68    7.75 
  -2  -2   0  161.42   13.62 
  -2  -2   0  165.00    8.74 
  -2  -2   0  159.56   13.77 
   2   2   0  153.52   12.37 
   2   2   0  163.94    9.55 
   2   2   0  168.01   11.09 
   2   2   0  147.55    7.73 
   2   2   0  158.74   13.45 
  -2  -2   0  178.95   24.44 
  -3  -2   0  254.20   14.44 
  -3  -2   0  240.18   16.71 
  -3  -2   0  273.56   19.52 
  -3  -2   0  293.55   21.07 
  -3  -2   0  264.18   13.16 
   3   2   0  253.09   13.39 
   3   2   0  254.35   17.56 
   3   2   0  285.51   20.85 
   3   2   0  277.23   19.25 
  -3  -2   0  311.14   42.44 
  -4  -2   0  312.48   27.00 
  -4  -2   0  363.76   26.40 
  -4  -2   0  316.45   22.37 
  -4  -2   0  364.73   18.01 
   4   2   0  379.46   30.43 
   4   2   0  387.57   19.20 
   4   2   0  369.22   25.69 
   4   2   0  335.37   23.83 
  -4  -2   0  261.51   44.20 
   4   2   0  387.13   42.16 
  -5  -2   0 1143.83   78.35 
  -5  -2   0 1175.65   78.43 
  -5  -2   0 1081.93   76.76 
  -5  -2   0 1176.85   54.69 
   5   2   0 1707.89 1046.28 
   5   2   0 1246.37   64.20 
   5   2   0 1203.46   80.94 
   5   2   0 1210.63   79.34 
  -5  -2   0 1229.42  131.28 
   5   2   0 1159.36  126.59 
  -6  -2   0   39.90   10.77 
  -6  -2   0   47.51    3.91 
  -6  -2   0   46.96    4.07 
  -6  -2   0   46.94   11.39 
   6   2   0   71.65   11.64 
   6   2   0   50.41    3.52 
   6   2   0   53.72   10.20 
   6   2   0   57.50   11.07 
  -6  -2   0   -1.96   38.80 
   6   2   0   13.30   28.11 
  -7  -2   0    5.39   10.95 
  -7  -2   0    7.88    2.69 
  -7  -2   0    5.64    3.03 
  -7  -2   0   -4.92   10.72 
   7   2   0   17.19   10.66 
   7   2   0    3.95    2.21 
   7   2   0   13.48    7.53 
   7   2   0    5.22    9.64 
  -7  -2   0  -16.78   50.74 
   7   2   0   13.53   33.56 
  -8  -2   0  208.52   10.42 
  -8  -2   0  160.22   18.75 
  -8  -2   0  196.37   14.94 
  -8  -2   0  171.45   21.04 
   8   2   0  193.31   19.63 
   8   2   0  224.83   20.24 
   8   2   0  209.21   12.21 
   8   2   0  200.36   18.26 
  -8  -2   0   33.71   64.29 
   8   2   0  196.05   47.36 
  -9  -2   0  201.66   23.35 
  -9  -2   0  178.14   29.86 
  -9  -2   0  240.72   11.42 
  -9  -2   0  243.41   16.91 
   9   2   0  210.75   13.80 
   9   2   0  250.14   23.92 
   9   2   0  215.61   24.12 
   9   2   0  240.31   21.54 
  -9  -2   0  144.60   71.05 
   9   2   0  198.13   56.76 
 -10  -2   0   49.90   23.24 
 -10  -2   0   40.18    5.28 
 -10  -2   0   37.23    3.71 
 -10  -2   0   69.98   18.09 
  10   2   0   46.89   16.62 
  10   2   0   43.89   15.66 
  10   2   0   36.36   13.60 
  10   2   0   32.34    4.08 
 -10  -2   0  -25.40   59.64 
  10   2   0   19.06   48.96 
 -11  -2   0   48.29   24.78 
 -11  -2   0   46.01    4.35 
 -11  -2   0   53.86    6.26 
  11   2   0   41.21   14.78 
  11   2   0   35.47   19.23 
 -12  -2   0    4.37    5.59 
 -12  -2   0   -2.85    3.61 
  12   2   0   23.44   22.54 
  12   2   0    6.04   15.08 
  11  -3   0   28.07   20.01 
  11  -3   0   43.54   16.80 
 -11   3   0   45.79    9.11 
  10  -3   0    4.21   16.10 
  10  -3   0    3.96   16.92 
  10  -3   0   -0.74    3.51 
  10  -3   0   50.45   91.91 
   9  -3   0  256.47   32.46 
   9  -3   0  316.29   24.42 
   9  -3   0  231.25   30.58 
   9  -3   0  237.12   20.35 
  -9   3   0  229.31   33.40 
  -9   3   0  222.23   39.77 
   9  -3   0  186.73  108.16 
  -9   3   0   46.74  126.62 
   8  -3   0  618.64   60.43 
   8  -3   0  669.67   51.86 
   8  -3   0  652.12   50.47 
   8  -3   0  652.11   37.62 
  -8   3   0  646.58   56.57 
  -8   3   0  598.12   53.09 
   8  -3   0  347.53  107.54 
  -8   3   0  664.06  133.52 
   7  -3   0  375.97   17.89 
   7  -3   0  361.34   26.45 
   7  -3   0  378.86   31.84 
   7  -3   0  333.40   34.35 
  -7   3   0  370.61   48.31 
  -7   3   0  400.16   52.43 
   7  -3   0  396.65   98.74 
  -7   3   0  185.30   71.45 
   6  -3   0   32.79   18.17 
   6  -3   0   57.87    3.60 
   6  -3   0   54.19   17.58 
   6  -3   0   58.62   10.93 
  -6   3   0   26.19   19.07 
  -6   3   0   86.73   20.33 
   6  -3   0    7.01   64.35 
  -6   3   0  109.61   73.38 
   5  -3   0  286.61   14.48 
   5  -3   0  288.55   24.81 
   5  -3   0  271.14   27.12 
  -5   3   0  263.16   25.14 
  -5   3   0  275.75   28.22 
   5  -3   0  263.01   73.62 
  -5   3   0  227.76   55.97 
   4  -3   0  520.52   24.79 
   4  -3   0  537.87   42.84 
   4  -3   0  562.51   39.17 
  -4   3   0  453.49   40.20 
  -4   3   0  535.46   44.67 
   4  -3   0  525.25   87.12 
  -4   3   0  504.88   82.31 
   3  -3   0  233.22   12.60 
   3  -3   0  250.98   22.81 
   3  -3   0  247.13   20.64 
  -3   3   0  236.55   21.09 
   3  -3   0  179.32   57.70 
  -3   3   0  210.78   43.19 
   2  -3   0   11.09   14.32 
   2  -3   0   31.73   11.81 
  -2   3   0   -2.13   12.02 
  -2   3   0   30.23   10.98 
   2  -3   0   56.64   41.56 
  -2   3   0    9.99   36.90 
   1  -3   0  363.26   25.46 
   1  -3   0  417.49   26.40 
  -1   3   0  356.88   28.06 
  -1   3   0  344.37   25.19 
  -1   3   0  335.14   20.67 
   1  -3   0  282.16   44.53 
  -1   3   0  366.28   45.83 
   0  -3   0  257.70   18.60 
   0  -3   0  277.06   26.98 
   0  -3   0  285.25   20.84 
   0   3   0  287.50   21.20 
   0   3   0  268.01   14.69 
   0   3   0  260.59   20.73 
   0  -3   0  286.07   38.23 
   0   3   0  201.28   36.72 
   0   3   0  243.43   33.58 
  -1  -3   0  279.01   19.97 
  -1  -3   0  294.46   21.18 
   1   3   0  284.86   20.28 
   1   3   0  276.88   22.09 
  -1  -3   0  223.89   34.08 
   1   3   0  247.54   33.18 
  -2  -3   0    4.33    1.65 
  -2  -3   0    2.84    4.77 
  -2  -3   0    0.66    3.31 
  -2  -3   0    0.49    5.12 
   2   3   0    3.47    1.63 
   2   3   0    0.69    4.53 
   2   3   0   -3.56    6.66 
  -2  -3   0    3.97   11.70 
   2   3   0  -21.57   11.81 
  -3  -3   0  565.98   33.79 
  -3  -3   0  570.29   39.33 
  -3  -3   0  589.19   38.83 
  -3  -3   0  643.62   29.72 
  -3  -3   0  606.09   40.44 
   3   3   0  587.86   43.32 
   3   3   0  623.45   29.36 
   3   3   0  591.47   42.20 
   3   3   0  607.78   40.24 
   3   3   0  583.75   36.85 
  -3  -3   0  678.34   75.85 
  -3  -3   0  763.63   78.47 
  -4  -3   0  578.64   28.45 
  -4  -3   0  554.32   41.11 
  -4  -3   0  614.12   48.57 
  -4  -3   0  619.24   38.56 
  -4  -3   0  587.73   33.86 
   4   3   0  609.07   57.23 
   4   3   0  624.78   42.75 
   4   3   0  590.15   28.20 
   4   3   0  584.84   39.07 
  -4  -3   0  583.50   72.03 
  -5  -3   0  338.81   23.96 
  -5  -3   0  345.98   26.47 
  -5  -3   0  336.24   18.12 
  -5  -3   0  321.04   17.96 
   5   3   0  388.79   30.44 
   5   3   0  369.84   25.66 
   5   3   0  357.99   17.03 
   5   3   0 1648.64 1379.39 
  -5  -3   0  448.47   59.21 
  -6  -3   0   20.22    2.45 
  -6  -3   0   29.63    9.60 
  -6  -3   0    9.67    9.62 
  -6  -3   0   29.82    3.28 
   6   3   0   29.01    2.78 
   6   3   0   34.31    9.49 
   6   3   0   20.84    9.04 
   6   3   0   21.42    6.95 
  -6  -3   0   18.57   36.98 
  -7  -3   0  165.52    8.36 
  -7  -3   0  135.70   17.70 
  -7  -3   0  176.86   17.51 
  -7  -3   0  140.23    9.33 
   7   3   0  157.29   16.52 
   7   3   0  157.64    9.37 
   7   3   0  195.00   15.44 
   7   3   0  177.88   16.85 
  -7  -3   0  170.94   53.24 
   7   3   0  172.01   35.18 
  -8  -3   0  558.09   42.30 
  -8  -3   0  576.35   52.90 
  -8  -3   0  527.91   34.38 
  -8  -3   0  507.12   23.77 
   8   3   0  526.99   37.33 
   8   3   0  509.37   28.92 
   8   3   0  523.18   37.51 
   8   3   0  478.69   46.83 
  -8  -3   0  550.16   93.22 
   8   3   0  574.61   71.44 
  -9  -3   0   58.55   15.34 
  -9  -3   0   54.14    4.88 
  -9  -3   0   41.57   15.16 
  -9  -3   0   54.73    5.45 
   9   3   0   75.88   14.48 
   9   3   0   57.98    5.62 
   9   3   0   64.72   12.15 
   9   3   0   57.91   12.05 
  -9  -3   0   93.27   67.79 
 -10  -3   0   45.99   19.72 
 -10  -3   0   35.07   16.26 
 -10  -3   0   65.34    6.33 
 -10  -3   0   73.33    4.99 
  10   3   0   81.77   14.29 
  10   3   0   68.07   15.14 
  10   3   0   59.72    5.65 
  10   3   0   71.36   15.28 
 -10  -3   0   24.80   72.53 
 -11  -3   0   55.28    6.41 
 -11  -3   0   28.44   16.37 
 -11  -3   0   54.10    4.71 
  11   3   0   26.39   18.37 
  11   3   0   74.47   14.81 
 -12  -3   0   51.05    6.81 
 -12  -3   0   42.76    4.86 
  12   3   0   44.07   22.72 
  12   3   0   52.79   15.59 
  11  -4   0    8.44   21.87 
 -11   4   0    3.23    7.75 
  10  -4   0    9.15   12.59 
  10  -4   0  -13.07   25.78 
 -10   4   0   20.68    7.23 
   9  -4   0   69.00   27.13 
   9  -4   0   93.22   18.33 
   9  -4   0   53.52   19.70 
   9  -4   0   65.63    6.32 
  -9   4   0   68.41   21.68 
   9  -4   0   65.13  121.56 
  -9   4   0  -30.55   83.52 
   8  -4   0  248.56   21.89 
   8  -4   0  249.22   29.48 
   8  -4   0  250.83   14.29 
   8  -4   0  249.28   28.83 
  -8   4   0  313.33   31.34 
  -8   4   0  220.47   30.98 
   8  -4   0  185.39   87.72 
  -8   4   0  371.91   99.40 
   7  -4   0  147.55   21.55 
   7  -4   0  119.50   16.37 
   7  -4   0  140.03   26.71 
   7  -4   0  157.15    8.58 
  -7   4   0  126.57   27.86 
  -7   4   0  177.89   23.56 
   7  -4   0  254.08   98.37 
  -7   4   0   95.71   73.06 
   6  -4   0   89.34    5.59 
   6  -4   0  129.29   19.19 
   6  -4   0  107.87   11.58 
   6  -4   0  108.05   18.47 
  -6   4   0  105.73   19.87 
  -6   4   0  136.29   20.17 
   6  -4   0   37.24   79.66 
  -6   4   0  118.00   63.57 
   5  -4   0  275.19   13.43 
   5  -4   0  288.73   26.34 
   5  -4   0  246.64   25.72 
  -5   4   0  301.08   27.27 
  -5   4   0  255.29   26.69 
   5  -4   0  349.27   71.60 
  -5   4   0  189.19   63.61 
   4  -4   0  142.29    7.09 
   4  -4   0  127.15   17.38 
   4  -4   0  150.15   18.30 
  -4   4   0  132.85   18.32 
  -4   4   0  181.96   19.41 
   4  -4   0  124.10   52.83 
  -4   4   0   61.42   44.79 
   3  -4   0   54.36   12.70 
   3  -4   0   58.07   16.74 
  -3   4   0   69.03   12.24 
  -3   4   0   43.73   16.18 
   3  -4   0   30.35   40.06 
  -3   4   0   34.78   49.12 
   2  -4   0 1882.65  139.92 
   2  -4   0 1940.00  137.16 
  -2   4   0 1782.44  135.51 
  -2   4   0 1832.30   95.64 
  -2   4   0 1635.86  148.54 
   2  -4   0 1624.44  181.50 
  -2   4   0 1579.91  189.80 
   1  -4   0  556.68   42.31 
   1  -4   0  538.83   39.05 
  -1   4   0  540.74   39.29 
  -1   4   0  600.61   43.08 
  -1   4   0  523.74   29.00 
   1  -4   0  462.95   69.31 
  -1   4   0  523.60   65.28 
   0  -4   0   54.64    9.42 
   0  -4   0   50.62    3.18 
   0  -4   0   48.34   13.31 
   0   4   0   54.98   12.46 
   0   4   0   52.12    3.21 
   0   4   0   74.76   10.66 
   0  -4   0   12.37   21.93 
   0   4   0   27.53   30.24 
  -1  -4   0  473.46   32.68 
  -1  -4   0  506.25   32.68 
   1   4   0  464.62   34.89 
   1   4   0  436.59   33.47 
  -1  -4   0  473.66   55.29 
  -1  -4   0  423.90   65.97 
   1   4   0  440.95   53.50 
  -2  -4   0  376.77   18.39 
  -2  -4   0  322.49   24.19 
  -2  -4   0  352.90   27.16 
   2   4   0  296.85   32.99 
   2   4   0  358.41   26.82 
  -2  -4   0  354.10   46.36 
   2   4   0  338.75   44.02 
  -3  -4   0   41.64    3.21 
  -3  -4   0   35.59    8.72 
  -3  -4   0   50.36   10.57 
  -3  -4   0   38.86    4.64 
   3   4   0   51.62    3.54 
   3   4   0   46.69    9.54 
   3   4   0   41.87    9.24 
  -3  -4   0   62.47   24.45 
  -4  -4   0  769.11   36.97 
  -4  -4   0  828.33   51.09 
  -4  -4   0  726.81   51.64 
  -4  -4   0  829.69   61.63 
   4   4   0  808.10   55.31 
   4   4   0  713.60   52.48 
   4   4   0  826.16   38.28 
   4   4   0  827.06   52.76 
   4   4   0  798.91   51.47 
  -4  -4   0  819.02   93.43 
  -4  -4   0  890.73  102.20 
  -5  -4   0 1488.45   96.14 
  -5  -4   0 1613.97   72.22 
  -5  -4   0 1574.84   92.43 
  -5  -4   0 1555.15   79.86 
  -5  -4   0 1630.96  100.61 
   5   4   0 1528.71   70.87 
   5   4   0 1490.93  113.37 
   5   4   0 1497.72  100.25 
   5   4   0 3321.80 1078.82 
  -5  -4   0 1477.86  158.13 
  -5  -4   0 1431.17  154.14 
  -6  -4   0  169.12    9.61 
  -6  -4   0  190.94   16.30 
  -6  -4   0  167.81   15.87 
  -6  -4   0  181.64    8.70 
   6   4   0  221.97   17.52 
   6   4   0  157.54   16.01 
   6   4   0  184.36    9.74 
   6   4   0  158.27   14.47 
  -6  -4   0  213.21   38.40 
  -6  -4   0  206.27   52.38 
  -7  -4   0  414.30   48.79 
  -7  -4   0  429.31   45.21 
  -7  -4   0  458.84   24.49 
  -7  -4   0  445.04   22.25 
   7   4   0  528.80   35.68 
   7   4   0  409.71   38.74 
   7   4   0  485.52   38.15 
   7   4   0  460.02   23.20 
  -7  -4   0  367.90   63.29 
  -8  -4   0    7.25    3.37 
  -8  -4   0   34.33   11.61 
  -8  -4   0   10.01    2.62 
  -8  -4   0    0.27   10.87 
   8   4   0    8.73   12.24 
   8   4   0   12.60   11.10 
   8   4   0   15.18  119.05 
   8   4   0    8.84    3.71 
  -8  -4   0  -56.36   62.37 
  -9  -4   0   -8.29   11.84 
  -9  -4   0    1.25    3.69 
  -9  -4   0    3.72    3.62 
  -9  -4   0   20.92   15.52 
   9   4   0   -4.04    9.27 
   9   4   0   21.87   12.40 
   9   4   0    6.54    3.02 
   9   4   0    9.24    9.54 
  -9  -4   0  -37.23   74.31 
 -10  -4   0   14.96    4.45 
 -10  -4   0   16.93   13.57 
 -10  -4   0   13.35    4.15 
 -10  -4   0   31.91   13.97 
  10   4   0   11.18    9.62 
  10   4   0   27.56   13.49 
  10   4   0   11.60    4.86 
  10   4   0   16.52   15.41 
 -10  -4   0   65.96   61.70 
 -11  -4   0   54.71    5.77 
 -11  -4   0   63.22    6.48 
 -11  -4   0   25.55   17.28 
  11   4   0   65.17   12.42 
  11   4   0   76.37   16.26 
 -11  -4   0    3.01   38.33 
 -12  -4   0   33.50    4.58 
 -12  -4   0   27.23    6.10 
  12   4   0   32.49   15.87 
  12   4   0   31.79   12.23 
  10  -5   0   14.58   31.33 
  10  -5   0   24.83   14.04 
 -10   5   0   19.08    9.99 
   9  -5   0  223.51   24.79 
   9  -5   0  324.23   29.23 
   9  -5   0  281.28   41.26 
   9  -5   0  327.47   45.64 
  -9   5   0  298.26   21.09 
  -9   5   0  305.30   42.74 
   9  -5   0  233.32  138.78 
  -9   5   0    9.06  115.08 
   8  -5   0  889.66   63.43 
   8  -5   0  863.68   87.05 
   8  -5   0  967.49   85.93 
   8  -5   0  887.70   63.95 
  -8   5   0  918.85   90.11 
  -8   5   0  937.68   74.83 
   8  -5   0  982.30  169.84 
  -8   5   0  748.75  168.37 
   7  -5   0  331.50   28.55 
   7  -5   0  304.68   16.93 
   7  -5   0  263.41   32.39 
   7  -5   0  333.79   36.79 
  -7   5   0  281.27   33.53 
  -7   5   0  252.53   43.27 
  -7   5   0  308.51   20.34 
   7  -5   0  342.83   96.45 
  -7   5   0  397.54  132.69 
   6  -5   0   -3.86    9.42 
   6  -5   0   -5.12   13.35 
   6  -5   0   43.47   21.55 
   6  -5   0    1.59    1.95 
  -6   5   0   -6.66   21.40 
  -6   5   0  -28.17   14.25 
   6  -5   0   69.61   93.35 
  -6   5   0   92.78   68.57 
   5  -5   0  241.24   12.04 
   5  -5   0  244.91   46.60 
   5  -5   0  235.31   29.25 
  -5   5   0  256.59   31.07 
  -5   5   0  275.84   27.88 
   5  -5   0  313.19   76.17 
  -5   5   0  179.16   88.14 
   4  -5   0  389.71   32.73 
   4  -5   0  410.19   20.39 
   4  -5   0  378.84   35.17 
  -4   5   0  392.78   33.44 
  -4   5   0  412.15   36.61 
  -4   5   0  385.53   20.65 
   4  -5   0  308.31   74.38 
  -4   5   0  413.59   86.14 
   3  -5   0  122.72   17.96 
   3  -5   0  152.82   19.27 
  -3   5   0  175.78   19.09 
  -3   5   0  153.06    9.39 
  -3   5   0  145.95   17.40 
   3  -5   0  130.69   55.73 
  -3   5   0  195.79   52.80 
   2  -5   0  115.08   20.14 
   2  -5   0  114.28   15.71 
  -2   5   0  156.57   16.10 
  -2   5   0  107.41   19.35 
  -2   5   0  122.76    7.30 
   2  -5   0  156.09   46.15 
  -2   5   0  187.47   58.37 
   1  -5   0  553.74   43.99 
   1  -5   0  536.49   38.86 
  -1   5   0  564.91   39.73 
  -1   5   0  540.87   41.06 
  -1   5   0  503.98   27.85 
   1  -5   0  549.35   76.67 
  -1   5   0  415.39   68.20 
  -1   5   0  547.11   67.93 
   0  -5   0  149.57   15.58 
   0  -5   0  146.56    8.78 
   0  -5   0  143.14   16.44 
   0   5   0  188.20   52.07 
   0   5   0  156.83    8.14 
   0   5   0  141.54   15.41 
   0  -5   0  137.81   35.53 
   0   5   0  139.94   34.55 
  -1  -5   0  730.84   48.65 
  -1  -5   0  850.49   75.73 
  -1  -5   0  778.31   43.36 
   1   5   0  748.39   58.03 
   1   5   0  765.20   58.69 
  -1  -5   0  712.16   85.05 
  -1  -5   0  718.19  105.06 
   1   5   0  733.10   86.92 
  -2  -5   0 2200.41  141.97 
  -2  -5   0 2289.91  109.03 
  -2  -5   0 2231.29  172.73 
   2   5   0 2159.03  138.58 
   2   5   0 2349.64  153.37 
  -2  -5   0 1983.44  214.28 
   2   5   0 2193.08  226.68 
  -3  -5   0  148.75   14.59 
  -3  -5   0  116.62   10.10 
  -3  -5   0  128.43    7.02 
  -3  -5   0  129.11   13.67 
   3   5   0  117.61    7.77 
   3   5   0  130.65   14.70 
   3   5   0  134.41   13.05 
  -3  -5   0   84.99   30.60 
   3   5   0  135.68   27.24 
  -4  -5   0  328.75   15.80 
  -4  -5   0  323.05   22.30 
  -4  -5   0  324.96   23.97 
  -4  -5   0  342.08   26.53 
   4   5   0  331.89   20.40 
   4   5   0  302.20   25.54 
   4   5   0  332.83   24.43 
  -4  -5   0  369.98   51.77 
  -5  -5   0  226.05   19.19 
  -5  -5   0  186.82   17.00 
  -5  -5   0  177.64   13.77 
  -5  -5   0  195.45    9.37 
   5   5   0  233.57   18.20 
   5   5   0  173.76   17.03 
   5   5   0  198.62   11.94 
   5   5   0  176.94   15.42 
   5   5   0  194.70    9.43 
  -5  -5   0  154.73   36.64 
  -5  -5   0  137.07   34.86 
  -6  -5   0   96.21   12.25 
  -6  -5   0   84.51    5.58 
  -6  -5   0   83.50   13.02 
   6   5   0   95.98   12.14 
   6   5   0   88.27    5.80 
   6   5   0   93.73   12.73 
   6   5   0  111.53   13.38 
  -6  -5   0   60.78   39.85 
  -6  -5   0  115.83   33.61 
  -7  -5   0   73.81   13.71 
  -7  -5   0   75.97    4.96 
  -7  -5   0   66.79   11.75 
  -7  -5   0   82.95    5.77 
   7   5   0   72.93   12.06 
   7   5   0   75.79   13.69 
   7   5   0   99.09   13.26 
   7   5   0   79.70    5.73 
  -7  -5   0  113.62   37.65 
  -7  -5   0  127.00   45.96 
  -8  -5   0  914.99   64.61 
  -8  -5   0  907.19   76.02 
  -8  -5   0  852.70   50.05 
  -8  -5   0  881.32   42.45 
   8   5   0  903.30   53.67 
   8   5   0  935.64   62.83 
   8   5   0  963.37   60.96 
   8   5   0  954.34   84.19 
  -8  -5   0  812.67   97.08 
  -8  -5   0  777.09  125.11 
  -9  -5   0  737.37   58.09 
  -9  -5   0  683.12   97.49 
  -9  -5   0  855.44   49.38 
  -9  -5   0  776.97   40.95 
   9   5   0  745.56   47.57 
   9   5   0  743.31   86.66 
   9   5   0  833.22   66.72 
   9   5   0  868.12   56.09 
  -9  -5   0  690.22   96.62 
  -9  -5   0  553.21  118.18 
 -10  -5   0  168.31    9.63 
 -10  -5   0  181.70   86.33 
 -10  -5   0  152.91   20.38 
 -10  -5   0  105.60   23.73 
  10   5   0  135.34   15.15 
  10   5   0  151.42   21.50 
 -10  -5   0   76.64   57.31 
 -10  -5   0  171.55   64.06 
 -11  -5   0    1.16   15.13 
 -11  -5   0    1.32    3.43 
 -11  -5   0    1.39    8.51 
  11   5   0   12.25   17.93 
  11   5   0   -5.47    8.53 
 -11  -5   0   31.39   46.36 
 -12  -5   0    3.19    5.33 
  12   5   0    7.37   11.39 
  12   5   0   -9.72   19.83 
  10  -6   0  125.77   25.23 
  10  -6   0  105.67   29.12 
 -10   6   0  126.89   13.41 
   9  -6   0   15.51   12.79 
   9  -6   0    4.30   29.87 
  -9   6   0   38.41   33.98 
  -9   6   0   15.61    6.65 
  -9   6   0   50.86  129.67 
   8  -6   0   73.99    5.48 
   8  -6   0   93.30   29.65 
   8  -6   0   84.40   17.18 
   8  -6   0   97.80   30.93 
  -8   6   0   86.48    9.56 
  -8   6   0   22.13   30.66 
   8  -6   0  454.52  148.60 
  -8   6   0  142.52  121.13 
   7  -6   0  183.33   32.71 
   7  -6   0  233.97   20.05 
   7  -6   0  229.42   15.37 
   7  -6   0  227.32   28.86 
  -7   6   0  217.89   30.22 
  -7   6   0  229.18   32.92 
  -7   6   0  229.85   16.80 
   7  -6   0  573.41  135.27 
  -7   6   0  113.92   88.02 
   6  -6   0  127.08   26.95 
   6  -6   0  101.90    7.51 
   6  -6   0  133.65   41.75 
   6  -6   0  132.78   26.84 
  -6   6   0  115.71   28.27 
  -6   6   0  109.27    8.80 
  -6   6   0   94.40   27.10 
   6  -6   0   89.96  110.66 
  -6   6   0   28.94  103.71 
   5  -6   0   23.30    3.31 
   5  -6   0   26.70   15.51 
   5  -6   0   12.49   14.66 
  -5   6   0   23.60    5.05 
  -5   6   0    5.02   14.47 
  -5   6   0   41.58   16.42 
   5  -6   0   12.52   65.89 
  -5   6   0   21.49   60.92 
   4  -6   0  510.57   23.16 
   4  -6   0  467.21   43.25 
   4  -6   0  482.52   39.38 
  -4   6   0  439.76   41.30 
  -4   6   0  516.02   28.63 
   4  -6   0  429.70  105.39 
  -4   6   0  480.80  100.75 
   3  -6   0 1229.15   79.43 
   3  -6   0 1300.84   84.76 
  -3   6   0 1247.98   62.97 
  -3   6   0 1184.49   78.29 
  -3   6   0 1215.58   85.38 
   3  -6   0 1483.67  163.09 
  -3   6   0 1162.13  154.61 
   2  -6   0 1627.34  108.50 
   2  -6   0 1687.75  107.24 
  -2   6   0 1770.19  102.12 
  -2   6   0 1597.94  108.35 
  -2   6   0 1619.43   84.26 
   2  -6   0 1874.53  202.40 
  -2   6   0 1746.49  200.76 
   1  -6   0 1701.06  103.75 
   1  -6   0 1841.64  183.34 
  -1   6   0 1660.44   84.49 
  -1   6   0 1665.03  119.37 
  -1   6   0 1660.68  104.88 
   1  -6   0 1647.03  170.94 
  -1   6   0 1178.31  184.28 
  -1   6   0 1939.80  183.47 
   0  -6   0   71.93    4.41 
   0  -6   0   69.52   12.88 
   0  -6   0   77.96   23.41 
   0   6   0   64.78   12.15 
   0   6   0   75.69    4.84 
   0   6   0   71.52   13.84 
   0  -6   0   68.06   35.48 
   0   6   0    7.99   30.55 
  -1  -6   0  479.16   38.03 
  -1  -6   0  522.34   45.14 
  -1  -6   0  465.05   26.54 
   1   6   0  540.05   39.02 
   1   6   0  462.60   51.27 
  -1  -6   0  470.60   68.89 
  -1  -6   0  506.17   78.12 
   1   6   0  369.07   63.66 
  -2  -6   0  159.69   15.98 
  -2  -6   0  153.41    9.13 
  -2  -6   0  131.21   19.32 
   2   6   0  154.26   17.77 
   2   6   0  155.93   15.55 
  -2  -6   0  216.28   51.63 
  -2  -6   0  127.57   36.49 
   2   6   0  156.72   42.23 
  -3  -6   0  224.07   19.75 
  -3  -6   0  240.05   12.55 
  -3  -6   0  271.15   17.89 
  -3  -6   0  270.24   23.45 
   3   6   0  215.40   19.33 
   3   6   0  217.79   20.96 
  -3  -6   0  206.55   40.40 
   3   6   0  255.45   46.93 
  -4  -6   0   22.22   10.59 
  -4  -6   0   -4.69    4.56 
  -4  -6   0    0.53    2.61 
  -4  -6   0   -5.83   12.38 
   4   6   0   13.81   10.72 
   4   6   0    1.75   10.43 
   4   6   0    4.99    2.86 
  -4  -6   0   34.81   32.06 
   4   6   0    3.91   21.83 
  -5  -6   0    3.88    4.88 
  -5  -6   0  -13.69   10.67 
  -5  -6   0    1.39    1.99 
  -5  -6   0    6.04   10.21 
   5   6   0    1.62   10.04 
   5   6   0   -5.23    2.68 
   5   6   0   14.06   10.15 
  -5  -6   0   -3.98   31.29 
  -6  -6   0  272.40   22.49 
  -6  -6   0  288.53   13.54 
  -6  -6   0  309.01   23.93 
  -6  -6   0  240.45   19.13 
   6   6   0  277.13   22.66 
   6   6   0  282.53   22.86 
   6   6   0  298.92   18.16 
  -6  -6   0  286.93   52.94 
  -6  -6   0  278.14   49.52 
  -7  -6   0  131.83   17.08 
  -7  -6   0  121.93   14.24 
  -7  -6   0  168.35    8.29 
   7   6   0  150.91   16.45 
   7   6   0  122.18   15.62 
   7   6   0  157.56   15.87 
  -7  -6   0  110.54   39.88 
  -7  -6   0   82.62   48.17 
  -8  -6   0  148.38    8.47 
  -8  -6   0   98.84   15.55 
  -8  -6   0  126.36   16.48 
   8   6   0  137.53   17.55 
   8   6   0  144.23   17.70 
   8   6   0  149.49   16.92 
  -8  -6   0   36.26   38.33 
  -8  -6   0  205.69   56.06 
  -9  -6   0   54.84   22.61 
  -9  -6   0    8.15    4.37 
  -9  -6   0   13.15   12.29 
   9   6   0   27.06   11.33 
   9   6   0   11.28   12.44 
   9   6   0   28.77   14.10 
  -9  -6   0    1.43   46.98 
  -9  -6   0   53.08   68.89 
 -10  -6   0   -2.56   15.64 
 -10  -6   0    9.20    4.41 
 -10  -6   0   -1.65   10.55 
  10   6   0    7.65   15.43 
  10   6   0   -1.48   11.28 
  10   6   0  -13.09    9.85 
 -10  -6   0   44.28   41.21 
 -10  -6   0  -84.51   72.09 
 -11  -6   0   46.70    5.85 
  11   6   0   32.49   18.56 
  11   6   0   34.79   10.90 
 -11  -6   0   -1.55   39.38 
 -12  -6   0  129.88   10.19 
  12   6   0  102.87   19.53 
   9  -7   0   74.51   27.53 
   9  -7   0   57.80   15.67 
  -9   7   0   42.90   27.67 
  -9   7   0   43.11   10.34 
   8  -7   0  150.64   31.66 
   8  -7   0  258.96   34.26 
   8  -7   0  190.75   25.09 
  -8   7   0  247.43   63.95 
  -8   7   0  217.18   34.17 
   8  -7   0  -13.31  110.16 
  -8   7   0   78.87   94.40 
   7  -7   0  -31.51   25.60 
   7  -7   0   19.59    2.39 
   7  -7   0   54.15   21.38 
   7  -7   0   30.02   10.01 
  -7   7   0  -17.95   29.36 
  -7   7   0   24.34    6.95 
   7  -7   0   53.26  131.00 
  -7   7   0    3.48   82.53 
  -7   7   0  -23.43   57.26 
   6  -7   0    2.91    7.40 
   6  -7   0   -0.30    1.83 
   6  -7   0    5.46   17.72 
   6  -7   0   14.62   17.58 
  -6   7   0   -2.51   18.42 
  -6   7   0   25.99   19.79 
  -6   7   0   -2.81    5.41 
   6  -7   0   50.62   87.52 
  -6   7   0   96.74   82.20 
   5  -7   0  143.50   27.08 
   5  -7   0  132.03    6.48 
   5  -7   0   54.95   25.80 
  -5   7   0  137.55   28.24 
  -5   7   0  104.54   27.25 
  -5   7   0  121.43    9.09 
   5  -7   0  279.72  114.56 
  -5   7   0   18.18   98.22 
   4  -7   0 1268.37   66.70 
   4  -7   0 1283.77   91.64 
   4  -7   0 1409.22   88.69 
  -4   7   0 1382.11   90.37 
  -4   7   0 1359.31   69.89 
   4  -7   0  918.01  189.91 
  -4   7   0 1122.87  166.43 
   3  -7   0 1610.66  116.96 
   3  -7   0 1630.85  101.36 
  -3   7   0 1519.13  101.90 
  -3   7   0 1606.23  109.19 
  -3   7   0 1570.29   84.96 
   3  -7   0 1684.73  197.14 
  -3   7   0 1415.12  179.83 
   2  -7   0  140.58   21.11 
   2  -7   0  161.06   19.65 
  -2   7   0  129.85   25.81 
  -2   7   0  135.37    8.45 
  -2   7   0  131.97   18.03 
   2  -7   0   23.99   50.65 
  -2   7   0   83.63   21.85 
  -2   7   0  153.26   52.86 
   1  -7   0   97.77   17.57 
   1  -7   0   81.46   18.92 
  -1   7   0   74.46   17.58 
  -1   7   0   83.97   16.16 
   1  -7   0   92.60   66.36 
  -1   7   0  196.77   52.40 
   0  -7   0 2673.42  181.18 
   0  -7   0 2635.33  184.21 
   0  -7   0 2736.30  154.95 
   0   7   0 2789.36  140.89 
   0   7   0 2661.78  203.75 
   0   7   0 2844.63  181.64 
   0  -7   0 2891.05  296.77 
   0   7   0 2666.01  293.88 
  -1  -7   0  350.94   17.70 
  -1  -7   0  322.69   27.33 
  -1  -7   0  317.42   29.08 
   1   7   0  386.55   28.75 
   1   7   0  351.87   27.55 
  -1  -7   0  336.15   55.15 
   1   7   0  226.33   48.72 
  -2  -7   0  403.10   50.17 
  -2  -7   0  411.04   18.84 
  -2  -7   0  410.32   21.16 
  -2  -7   0  413.47   30.00 
   2   7   0  331.05   29.11 
   2   7   0  348.18   29.00 
  -2  -7   0  494.16   65.61 
  -2  -7   0  308.66   85.15 
   2   7   0  395.46   60.34 
  -3  -7   0 2224.78  171.30 
  -3  -7   0 2332.68  147.82 
  -3  -7   0 2263.22  106.38 
  -3  -7   0 2114.21  143.75 
   3   7   0 2403.41  168.14 
   3   7   0 2374.35  154.23 
  -3  -7   0 2550.62  265.09 
  -3  -7   0 2112.72  305.17 
   3   7   0 2600.29  263.02 
  -4  -7   0   16.87    3.38 
  -4  -7   0   32.50    5.84 
  -4  -7   0   37.02   10.02 
  -4  -7   0   15.64   13.90 
   4   7   0   27.83   12.78 
   4   7   0   21.92   12.08 
   4   7   0   46.27    6.04 
  -4  -7   0  -16.71   28.09 
   4   7   0  -27.32   37.28 
  -5  -7   0  554.42   35.86 
  -5  -7   0  424.52   36.21 
  -5  -7   0  453.98   22.39 
  -5  -7   0  460.18   30.60 
   5   7   0  462.94   30.43 
   5   7   0  415.33   33.32 
   5   7   0  445.86   45.43 
  -5  -7   0  438.97   70.41 
  -6  -7   0  152.39    8.01 
  -6  -7   0  136.88   11.66 
  -6  -7   0  147.88   17.28 
  -6  -7   0  144.27   19.37 
   6   7   0  113.36   17.44 
   6   7   0  138.35    8.98 
   6   7   0  142.43   17.45 
  -6  -7   0  137.33   42.25 
  -6  -7   0  148.15   42.96 
  -7  -7   0   84.51   12.25 
  -7  -7   0   94.71    6.27 
  -7  -7   0  101.04   15.70 
   7   7   0   63.92   13.90 
   7   7   0   97.04    7.80 
   7   7   0  101.44   12.36 
  -7  -7   0   48.75   38.34 
  -7  -7   0   78.24   46.93 
  -8  -7   0  285.32   17.17 
  -8  -7   0  251.23   25.75 
  -8  -7   0  275.38   23.95 
   8   7   0  277.46   23.46 
   8   7   0  254.21   22.84 
  -8  -7   0  183.23   52.81 
  -8  -7   0  153.73   60.95 
  -9  -7   0 1000.16   52.21 
  -9  -7   0  800.22   65.63 
  -9  -7   0  741.90   93.74 
   9   7   0  915.93  108.88 
   9   7   0  820.29   84.54 
  -9  -7   0  749.17   85.44 
  -9  -7   0  384.53  106.13 
 -10  -7   0  255.19   14.74 
 -10  -7   0  196.24   29.58 
  10   7   0  180.77   20.99 
  10   7   0  247.97   27.79 
 -10  -7   0  198.78   56.43 
 -11  -7   0   26.68    5.46 
  11   7   0    8.72    9.14 
  11   7   0   32.79   13.56 
 -11  -7   0   51.98   47.72 
 -12  -7   0   -7.99    5.43 
  12   7   0   -3.68   13.80 
   9  -8   0   12.36   13.94 
   9  -8   0   20.06   24.99 
  -9   8   0   27.46   10.45 
   8  -8   0   12.73   15.89 
   8  -8   0  -29.78   34.01 
   8  -8   0  -17.11   23.01 
  -8   8   0   12.52   24.14 
  -8   8   0    4.28    5.85 
   8  -8   0  -51.76  167.61 
   7  -8   0  -15.86   30.89 
   7  -8   0    3.74    9.52 
   7  -8   0    1.38   20.25 
   7  -8   0   -0.03    2.22 
  -7   8   0  -29.61   29.80 
  -7   8   0   -7.29    4.88 
   7  -8   0  -47.91   98.57 
  -7   8   0  134.04  133.88 
  -7   8   0    5.15   52.82 
   6  -8   0   -4.50   19.30 
   6  -8   0    1.40    1.56 
   6  -8   0   -7.46   19.60 
   6  -8   0    2.76   10.93 
  -6   8   0   -8.61    5.85 
  -6   8   0   -8.82   18.57 
   6  -8   0  -25.45  100.44 
  -6   8   0    0.00   64.67 
  -6   8   0   34.07   85.14 
   5  -8   0   30.98   25.08 
   5  -8   0   74.60   22.36 
   5  -8   0   46.34    3.25 
  -5   8   0   32.18    4.98 
  -5   8   0   21.72   26.27 
  -5   8   0   69.21   22.07 
   5  -8   0  -55.26  113.92 
  -5   8   0  -26.53   77.10 
  -5   8   0   40.92   46.34 
   4  -8   0  304.88   32.98 
   4  -8   0  364.55   35.83 
  -4   8   0  327.58   33.98 
  -4   8   0  327.81   21.17 
   4  -8   0  283.73   92.19 
  -4   8   0  184.51   79.85 
  -4   8   0  192.70   35.74 
   3  -8   0   19.49   21.85 
   3  -8   0   54.97   24.45 
  -3   8   0   54.45   22.80 
  -3   8   0   76.05   20.49 
  -3   8   0   74.43    7.44 
   3  -8   0  158.72   99.01 
  -3   8   0   70.82   84.69 
   2  -8   0  236.25   31.24 
   2  -8   0  190.55   24.69 
  -2   8   0  236.65   12.18 
  -2   8   0  252.51   31.45 
  -2   8   0  236.10   24.49 
   2  -8   0  206.97   89.74 
  -2   8   0  196.65   82.86 
   1  -8   0  -11.42   12.10 
   1  -8   0   -6.60   14.34 
  -1   8   0   -3.59   10.52 
  -1   8   0    6.20   13.71 
  -1   8   0    5.97    3.19 
   1  -8   0   13.03   50.90 
  -1   8   0   55.71   48.98 
   0  -8   0   42.52   18.09 
   0  -8   0   19.23   20.68 
   0   8   0   54.10   14.98 
   0   8   0   25.36   16.02 
   0  -8   0  182.32   67.78 
   0   8   0  -51.23   54.73 
  -1  -8   0  367.82   31.28 
  -1  -8   0  333.43   22.45 
  -1  -8   0  316.67   28.22 
   1   8   0  314.23   28.55 
   1   8   0  329.03   27.81 
  -1  -8   0  288.89   65.59 
   1   8   0  469.69   74.42 
  -2  -8   0  250.33   14.62 
  -2  -8   0  230.28   12.19 
  -2  -8   0  234.71   24.79 
  -2  -8   0  254.50   30.31 
   2   8   0  264.19   26.06 
   2   8   0  258.11   25.00 
  -2  -8   0  316.26   70.08 
  -2  -8   0  219.88   70.46 
   2   8   0  260.59   63.00 
  -3  -8   0 1008.37   70.57 
  -3  -8   0 1120.09   52.83 
  -3  -8   0 1118.45   73.79 
   3   8   0 1032.44  112.44 
   3   8   0 1077.96   69.57 
  -3  -8   0  935.20  159.85 
  -3  -8   0 1167.18  132.40 
   3   8   0 1015.23  127.33 
  -4  -8   0  684.84   34.15 
  -4  -8   0  758.63   48.06 
  -4  -8   0  654.66   56.37 
  -4  -8   0  715.81   49.80 
   4   8   0  673.88   50.40 
   4   8   0  607.23   49.36 
   4   8   0  742.41   45.25 
  -4  -8   0  518.56   88.85 
  -4  -8   0  699.56  117.38 
   4   8   0  695.24   91.42 
  -5  -8   0  362.60   32.39 
  -5  -8   0  322.03   27.58 
  -5  -8   0  355.49   35.64 
  -5  -8   0  355.98   16.66 
   5   8   0  373.48   19.43 
   5   8   0  331.63   29.82 
   5   8   0  330.56   28.21 
  -5  -8   0  400.83  104.27 
  -5  -8   0  274.92   63.74 
  -6  -8   0   49.72    7.65 
  -6  -8   0   53.66   14.84 
  -6  -8   0   64.63    5.23 
  -6  -8   0   68.15   13.64 
   6   8   0   61.63   14.93 
   6   8   0   62.13    5.09 
   6   8   0   76.05   14.24 
  -6  -8   0   19.50   44.99 
  -7  -8   0   12.97    6.43 
  -7  -8   0   21.57   12.88 
  -7  -8   0   13.68    3.01 
  -7  -8   0   18.14   13.70 
   7   8   0   22.40   11.66 
   7   8   0    5.02    3.75 
   7   8   0   18.32   13.13 
  -7  -8   0   -5.40   41.01 
  -7  -8   0   28.16   47.79 
  -8  -8   0    9.62   12.65 
  -8  -8   0    6.57    2.91 
  -8  -8   0   -3.11   13.07 
   8   8   0   12.28   11.27 
   8   8   0   -1.25   12.19 
  -8  -8   0   13.86   55.93 
  -8  -8   0   -1.36   43.05 
  -9  -8   0    5.17   15.01 
  -9  -8   0    3.67   12.29 
  -9  -8   0   -0.03    4.47 
   9   8   0    9.61   11.15 
   9   8   0   -3.93   14.53 
  -9  -8   0   -4.18   44.09 
  -9  -8   0    7.70   72.13 
 -10  -8   0   59.58   14.25 
 -10  -8   0   52.15    6.16 
  10   8   0   72.17   15.63 
 -10  -8   0    8.71   45.98 
 -11  -8   0   26.12    5.69 
  11   8   0   19.19    9.71 
 -12  -8   0   40.86    6.90 
   8  -9   0   57.43   14.37 
   8  -9   0   16.93   35.32 
  -8   9   0   33.01   43.33 
  -8   9   0   42.54    9.51 
   8  -9   0  -34.79  132.21 
   7  -9   0  192.98   43.92 
   7  -9   0  279.48   24.53 
   7  -9   0  281.39   38.68 
  -7   9   0  285.39   21.17 
  -7   9   0  337.07   40.95 
   7  -9   0  169.03  129.77 
   6  -9   0   24.21    2.26 
   6  -9   0   32.15   13.25 
   6  -9   0   23.59   31.06 
   6  -9   0  -21.84   30.97 
  -6   9   0   32.43    5.36 
  -6   9   0   19.58   31.04 
   6  -9   0  238.10  165.09 
  -6   9   0   37.49  126.28 
   5  -9   0   49.03   23.57 
   5  -9   0  118.83   30.55 
   5  -9   0   74.75    6.16 
  -5   9   0  122.27   31.70 
  -5   9   0   84.04    6.94 
   5  -9   0  -84.37  141.37 
  -5   9   0    8.24   76.64 
   4  -9   0  251.84   38.03 
   4  -9   0  237.98   31.17 
  -4   9   0  356.11   48.21 
  -4   9   0  277.62   16.36 
   4  -9   0  175.77   94.31 
  -4   9   0  201.97  117.79 
   3  -9   0  965.86   73.65 
   3  -9   0 1062.81   73.95 
  -3   9   0 1101.68   72.58 
  -3   9   0 1076.75   73.51 
  -3   9   0  978.21   56.36 
   3  -9   0 1028.15  151.15 
  -3   9   0  949.04  145.05 
   2  -9   0   15.58   24.02 
   2  -9   0   -0.43   19.93 
  -2   9   0   20.88   18.26 
  -2   9   0   -2.80   23.12 
  -2   9   0   23.61    3.80 
   2  -9   0   83.81   97.48 
  -2   9   0   84.15   87.06 
   1  -9   0  407.53   36.90 
   1  -9   0  396.85   38.75 
  -1   9   0  407.87   21.04 
  -1   9   0  364.34   35.13 
  -1   9   0  353.15   39.12 
   1  -9   0  194.28   94.79 
  -1   9   0  477.74   81.09 
   0  -9   0   38.36   23.56 
   0  -9   0  102.99   17.61 
   0   9   0   60.43   15.09 
   0   9   0   47.27   21.20 
   0  -9   0   26.57   78.33 
   0   9   0  131.32   69.00 
  -1  -9   0  202.78   22.11 
  -1  -9   0  163.24   11.15 
  -1  -9   0  183.94   23.76 
   1   9   0  167.41   21.75 
   1   9   0  156.19   19.57 
  -1  -9   0  286.32   65.50 
   1   9   0  172.87   54.98 
  -2  -9   0  115.52   17.67 
  -2  -9   0  114.42   24.43 
  -2  -9   0  126.51    7.45 
  -2  -9   0  111.46    7.66 
   2   9   0  109.93   16.91 
   2   9   0  127.80   21.66 
  -2  -9   0   59.13   48.54 
   2   9   0  115.44   60.75 
  -3  -9   0   48.25   13.24 
  -3  -9   0   26.63    2.12 
  -3  -9   0   17.23   14.25 
  -3  -9   0   28.71    3.65 
   3   9   0   16.16   12.29 
   3   9   0   31.48   11.90 
  -3  -9   0   15.78  100.17 
  -3  -9   0   59.41   46.32 
   3   9   0  149.46   58.86 
  -4  -9   0   16.70    6.97 
  -4  -9   0   11.96   15.23 
  -4  -9   0   22.64   18.05 
  -4  -9   0   34.14    3.50 
   4   9   0   62.99   16.00 
   4   9   0   33.59    3.72 
   4   9   0   32.49   15.51 
  -4  -9   0   76.08   78.72 
  -4  -9   0  -31.20   59.12 
   4   9   0   81.66   57.24 
  -5  -9   0  273.72   21.29 
  -5  -9   0  339.19   17.22 
  -5  -9   0  359.32   28.19 
  -5  -9   0  336.73   32.06 
   5   9   0  290.14   28.46 
   5   9   0  344.03   33.16 
   5   9   0  347.53   19.13 
  -5  -9   0  264.08   69.32 
  -5  -9   0  244.68  137.26 
   5   9   0  241.75   64.64 
  -6  -9   0   13.23    3.89 
  -6  -9   0   15.51   16.52 
  -6  -9   0    5.36    5.56 
  -6  -9   0   14.24   14.15 
   6   9   0    8.28    3.98 
   6   9   0    0.44   12.34 
   6   9   0   14.37   10.92 
  -6  -9   0 -168.12  146.31 
  -6  -9   0   10.32   56.69 
  -7  -9   0  193.37   22.81 
  -7  -9   0  189.85   30.94 
  -7  -9   0  216.12   13.13 
  -7  -9   0  211.20   18.21 
   7   9   0  215.71   23.14 
   7   9   0  223.72   15.05 
   7   9   0  209.24   26.89 
  -7  -9   0  250.01   59.21 
  -7  -9   0   12.60  120.22 
  -7  -9   0   85.91   60.63 
  -8  -9   0   55.82    4.81 
  -8  -9   0   60.54   13.73 
  -8  -9   0   53.85   12.19 
   8   9   0   55.56    6.20 
   8   9   0   55.65   14.06 
   8   9   0   62.45   16.00 
  -8  -9   0   21.34   58.13 
  -8  -9   0   22.37   54.78 
  -8  -9   0  -38.63  134.27 
  -9  -9   0   12.63   13.03 
  -9  -9   0   28.02    4.06 
  -9  -9   0    0.50   13.68 
   9   9   0   21.45   13.63 
   9   9   0   18.42   11.86 
  -9  -9   0   59.65   56.37 
  -9  -9   0   78.85   70.17 
 -10  -9   0   32.93    4.62 
 -10  -9   0   30.06   13.05 
  10   9   0   45.73   15.47 
 -11  -9   0   -0.83    5.40 
  11   9   0    4.48   13.04 
   7 -10   0  -15.35   24.40 
   7 -10   0   29.22   16.39 
  -7  10   0   -5.12    7.53 
  -7  10   0   19.86   27.83 
   7 -10   0  193.27  201.06 
   6 -10   0  577.76   66.01 
   6 -10   0  528.68   74.55 
   6 -10   0  650.31   43.19 
  -6  10   0  648.27   46.06 
  -6  10   0  619.07   64.06 
   6 -10   0  455.17  182.39 
   5 -10   0  738.95   80.65 
   5 -10   0  460.03   63.18 
   5 -10   0  652.03   56.09 
  -5  10   0  650.37   79.84 
  -5  10   0  658.07   42.63 
   5 -10   0  152.75  160.42 
  -5  10   0  215.98  139.66 
   4 -10   0   14.46   29.07 
   4 -10   0   68.51   30.39 
  -4  10   0   22.25   28.88 
  -4  10   0    9.33    5.10 
   4 -10   0   37.43  146.00 
  -4  10   0   51.84  114.62 
   3 -10   0   -8.58   17.36 
   3 -10   0   43.25   21.70 
  -3  10   0   -0.71   18.58 
  -3  10   0    5.93    4.18 
  -3  10   0    3.90   15.44 
   3 -10   0  -92.07  127.16 
  -3  10   0   48.39   76.67 
   2 -10   0  -24.56   15.45 
   2 -10   0    8.61   19.23 
  -2  10   0   -3.98   17.20 
  -2  10   0   23.65   14.79 
   2 -10   0  130.74   80.31 
  -2  10   0  -40.54   67.22 
   1 -10   0  287.74   32.70 
   1 -10   0  342.11   35.21 
  -1  10   0  334.24   33.46 
  -1  10   0  318.63   23.13 
  -1  10   0  308.45   30.06 
   1 -10   0  379.15   89.62 
  -1  10   0  361.42   83.16 
   0 -10   0 1036.02   76.69 
   0 -10   0 1037.42   72.86 
   0  10   0 1008.26   69.96 
   0  10   0 1091.89   73.87 
   0 -10   0 1195.55  152.60 
   0  10   0 1048.48  153.52 
  -1 -10   0  901.52   92.03 
  -1 -10   0  980.97   74.52 
  -1 -10   0  898.12   53.76 
  -1 -10   0  883.44   45.99 
   1  10   0  840.02   63.49 
   1  10   0  818.12   63.08 
  -1 -10   0  914.96  118.37 
   1  10   0  649.91  118.91 
  -2 -10   0  770.20   56.01 
  -2 -10   0  708.12   45.84 
  -2 -10   0  807.40   56.33 
  -2 -10   0  697.00   34.88 
   2  10   0  632.76   67.45 
   2  10   0  718.53   52.08 
  -2 -10   0  731.47  119.13 
   2  10   0  639.26   97.45 
  -3 -10   0    4.33   17.24 
  -3 -10   0  -12.23   14.64 
  -3 -10   0    3.76    2.30 
  -3 -10   0    0.26    1.94 
   3  10   0    1.05   16.40 
   3  10   0    2.01   14.35 
  -3 -10   0   67.81   73.59 
  -3 -10   0  109.07  118.95 
   3  10   0  -45.63   44.87 
  -4 -10   0   22.48   15.07 
  -4 -10   0   16.00    7.14 
  -4 -10   0   14.48   12.55 
  -4 -10   0   16.49    2.91 
   4  10   0   -1.47   10.63 
   4  10   0   -2.36   11.37 
  -4 -10   0   42.60   48.10 
  -4 -10   0  109.91   89.57 
   4  10   0  -10.19   43.48 
  -5 -10   0   49.15    4.23 
  -5 -10   0   46.88    7.30 
  -5 -10   0   52.01   14.41 
  -5 -10   0   44.79   15.35 
   5  10   0   31.25   12.14 
   5  10   0   78.28   15.00 
   5  10   0   55.07    5.56 
  -5 -10   0  -31.23  100.40 
  -5 -10   0   45.93   70.38 
   5  10   0   75.55   62.96 
  -6 -10   0   67.69    5.14 
  -6 -10   0   44.73   17.85 
  -6 -10   0  114.00   23.31 
  -6 -10   0   56.03    7.99 
   6  10   0   72.18   19.51 
   6  10   0   78.03    6.57 
   6  10   0   72.80   18.60 
  -6 -10   0  242.04  124.49 
  -6 -10   0   89.91   71.19 
  -7 -10   0   19.32    6.72 
  -7 -10   0   11.84   11.22 
  -7 -10   0   12.60   17.36 
  -7 -10   0    7.45    3.20 
   7  10   0   19.03   11.32 
   7  10   0   13.02    4.86 
   7  10   0   53.36   17.13 
  -7 -10   0    7.88   53.76 
  -7 -10   0    4.35  180.30 
  -7 -10   0  -16.88   43.07 
  -8 -10   0    0.91   14.46 
  -8 -10   0    4.24    4.37 
  -8 -10   0  -10.25   16.43 
   8  10   0    3.92   15.14 
   8  10   0   -2.48    4.75 
   8  10   0   11.55   13.89 
  -8 -10   0    6.20   65.31 
  -8 -10   0 -244.69  204.17 
  -8 -10   0  -47.07   63.24 
  -9 -10   0   -3.91   14.37 
  -9 -10   0    6.29    4.98 
   9  10   0   -2.51   13.84 
   9  10   0    2.22   13.55 
  -9 -10   0   15.93   58.32 
 -10 -10   0   15.79   14.36 
 -10 -10   0   11.08    5.57 
  10  10   0    3.51   12.62 
 -11 -10   0   -5.99    4.17 
  11  10   0   11.34   13.75 
   7 -11   0   22.35   31.73 
   7 -11   0   -8.73   11.51 
  -7  11   0   -0.26   29.34 
  -7  11   0    0.39    8.18 
   6 -11   0   30.64   14.99 
   6 -11   0   16.20   25.71 
  -6  11   0   12.99    5.50 
  -6  11   0  -20.43   25.78 
   5 -11   0  395.38   51.43 
  -5  11   0  387.49   26.95 
  -5  11   0  404.34   46.40 
   5 -11   0    1.85  110.44 
   4 -11   0  177.78   31.22 
   4 -11   0  221.88   41.39 
  -4  11   0   88.93   27.40 
  -4  11   0  122.07    9.33 
   4 -11   0  112.51  164.88 
  -4  11   0   72.82   92.60 
   3 -11   0   14.49   28.51 
   3 -11   0   32.55   23.28 
  -3  11   0   21.72   21.18 
  -3  11   0   23.36    3.74 
   3 -11   0 -252.62  142.55 
  -3  11   0  -15.54   81.77 
   2 -11   0   27.99   18.69 
   2 -11   0   26.30   22.86 
  -2  11   0   11.37    2.70 
  -2  11   0   -8.01   18.39 
  -2  11   0   17.89   15.30 
   2 -11   0   67.16   95.83 
  -2  11   0   38.08   73.38 
   1 -11   0   61.45   23.20 
   1 -11   0   94.83   21.65 
  -1  11   0   53.45   17.42 
  -1  11   0   86.85   21.44 
   1 -11   0  -35.05   71.52 
  -1  11   0  161.55   72.94 
   0 -11   0  110.98   25.69 
   0 -11   0  124.35   22.63 
   0  11   0  139.58   23.79 
   0  11   0  130.39   21.18 
   0 -11   0  161.96   78.54 
   0  11   0  141.42   71.42 
  -1 -11   0  325.58   35.21 
  -1 -11   0  345.43   33.18 
  -1 -11   0  331.23   20.88 
   1  11   0  291.91   30.83 
   1  11   0  320.36   32.81 
  -1 -11   0  120.93   75.08 
   1  11   0  186.80   65.74 
  -2 -11   0   74.22    7.85 
  -2 -11   0   96.35    7.21 
  -2 -11   0  118.68   25.60 
  -2 -11   0  117.97   31.11 
   2  11   0  127.28   22.93 
   2  11   0  103.29   24.48 
  -2 -11   0  138.39   93.49 
   2  11   0  136.64   81.78 
  -3 -11   0   82.74    5.77 
  -3 -11   0   80.71    5.78 
  -3 -11   0   71.11   18.30 
  -3 -11   0   82.68   21.70 
   3  11   0   85.85   18.57 
   3  11   0   58.12   16.27 
  -3 -11   0  129.60   70.08 
   3  11   0   15.53   54.80 
  -4 -11   0  353.31   31.27 
  -4 -11   0  373.77   21.98 
  -4 -11   0  307.86   41.48 
  -4 -11   0  372.22   19.78 
  -4 -11   0  356.28   32.44 
   4  11   0  340.05   34.18 
   4  11   0  336.38   33.54 
  -4 -11   0  460.66  127.88 
  -4 -11   0  313.10  100.79 
   4  11   0  339.32   91.76 
  -5 -11   0  119.73   22.60 
  -5 -11   0   94.74   11.30 
  -5 -11   0  117.91    7.06 
  -5 -11   0   93.85   25.73 
   5  11   0  109.60    8.50 
   5  11   0  151.77   23.34 
   5  11   0   84.61   20.16 
  -5 -11   0  -84.16  103.40 
  -5 -11   0  121.33   82.58 
   5  11   0  216.46   81.51 
  -6 -11   0  266.53   31.60 
  -6 -11   0  265.53   15.52 
  -6 -11   0  253.46   31.46 
  -6 -11   0  221.03   17.05 
   6  11   0  222.06   25.98 
   6  11   0  245.22   21.34 
   6  11   0  259.94   29.07 
  -6 -11   0  247.16   86.19 
  -6 -11   0  142.70  180.14 
  -7 -11   0  402.18   30.45 
  -7 -11   0  442.41   40.50 
  -7 -11   0  457.76   25.71 
  -7 -11   0  338.94   35.18 
   7  11   0  427.80   37.87 
   7  11   0  400.34   43.18 
   7  11   0  462.57   46.43 
  -7 -11   0   98.30  142.04 
  -7 -11   0  198.09   77.54 
  -8 -11   0   37.88   19.00 
  -8 -11   0   82.35    6.83 
  -8 -11   0   66.72   24.73 
   8  11   0   71.96   17.25 
   8  11   0   50.81   18.74 
  -8 -11   0   27.56   72.57 
  -8 -11   0   36.29   71.43 
  -9 -11   0  -17.66   17.20 
  -9 -11   0    2.79    3.60 
   9  11   0   16.81   33.23 
 -10 -11   0   37.49    5.30 
  10  11   0   29.90   15.25 
 -11 -11   0   -3.74    6.24 
  11  11   0    1.00   11.71 
   6 -12   0   21.97   33.17 
   6 -12   0   51.89   12.95 
  -6  12   0   53.46   31.92 
  -6  12   0   46.88    8.21 
   5 -12   0   17.54   27.40 
   5 -12   0   23.85   13.36 
  -5  12   0   18.81   26.85 
  -5  12   0    0.56    5.92 
   4 -12   0   53.31   27.55 
  -4  12   0    9.90   23.61 
  -4  12   0   28.05    5.90 
   4 -12   0    0.00  120.22 
  -4  12   0  -81.76   92.38 
   3 -12   0   22.74   35.25 
  -3  12   0   53.73    5.55 
  -3  12   0   34.64   32.04 
   3 -12   0  -23.59  111.37 
  -3  12   0  -12.17   88.07 
   2 -12   0   98.21   28.25 
  -2  12   0   66.75    7.84 
  -2  12   0   70.67   24.02 
   2 -12   0 -104.12  138.94 
  -2  12   0  120.74   84.15 
   1 -12   0   24.17   28.04 
   1 -12   0   32.21   24.10 
  -1  12   0   48.17   21.49 
  -1  12   0   -5.91   21.57 
   1 -12   0   31.85  120.86 
  -1  12   0  108.35   80.46 
   0 -12   0   -3.39   17.63 
   0 -12   0    6.59    2.15 
   0 -12   0    4.35   21.14 
   0  12   0    4.39   13.81 
   0  12   0    0.00   17.97 
   0 -12   0  -68.72   79.88 
   0  12   0 -102.65   69.73 
  -1 -12   0   93.56   32.20 
  -1 -12   0   64.75   20.79 
  -1 -12   0   81.01    5.48 
   1  12   0   60.66   18.28 
   1  12   0   78.38   21.79 
  -1 -12   0   57.04  108.47 
   1  12   0  103.42   70.43 
  -2 -12   0   28.52    2.74 
  -2 -12   0   24.42   21.01 
  -2 -12   0   30.96    4.06 
  -2 -12   0   13.30   16.62 
   2  12   0   28.58   16.26 
   2  12   0   56.40   18.50 
  -2 -12   0   55.60   78.14 
   2  12   0   39.00   62.23 
  -3 -12   0  -11.04   21.86 
  -3 -12   0   14.77   26.39 
   3  12   0   12.11   15.72 
   3  12   0   25.39   19.82 
  -3 -12   0    1.58  101.98 
   3  12   0   21.69   82.52 
  -4 -12   0  121.33    7.75 
  -4 -12   0  128.63    7.79 
  -4 -12   0  123.17   32.49 
  -4 -12   0  101.24   21.19 
  -4 -12   0  101.16   13.24 
   4  12   0   88.98   24.79 
   4  12   0  111.77   19.97 
  -4 -12   0  265.46   86.48 
  -4 -12   0   83.11  154.28 
   4  12   0  177.49   95.55 
  -5 -12   0  317.70   32.61 
  -5 -12   0  373.45   44.15 
  -5 -12   0  344.53   38.15 
  -5 -12   0  353.47   20.54 
   5  12   0  425.79   37.99 
   5  12   0  323.00   27.64 
   5  12   0  312.81   31.16 
  -5 -12   0   86.85  127.02 
  -5 -12   0  422.80   88.36 
   5  12   0  220.88   74.15 
  -6 -12   0   82.92    6.04 
  -6 -12   0   74.78    8.96 
  -6 -12   0   70.18   22.02 
  -6 -12   0   59.93   22.11 
   6  12   0   93.45    9.05 
   6  12   0   69.23   20.46 
   6  12   0  122.55   24.62 
  -6 -12   0  -64.74  193.91 
  -6 -12   0   32.31   92.26 
  -7 -12   0  133.62   28.46 
  -7 -12   0  134.23   20.32 
  -7 -12   0  113.81   11.08 
  -7 -12   0  112.27    8.35 
   7  12   0  139.49   19.23 
   7  12   0   91.11   24.76 
  -7 -12   0  194.01   74.07 
  -7 -12   0  -87.97  225.98 
  -8 -12   0   37.76    6.32 
  -8 -12   0   24.20   21.20 
   8  12   0   41.03   20.03 
  -8 -12   0   11.54   85.94 
  -9 -12   0   -1.98    3.79 
   9  12   0    3.93   18.37 
 -10 -12   0    2.47    6.19 
  10  12   0   12.69   16.90 
   5 -13   0  107.08   39.48 
   5 -13   0  115.55   16.80 
  -5  13   0  112.75   35.19 
  -5  13   0   88.57   10.94 
   4 -13   0  133.93   35.22 
  -4  13   0  108.21   10.34 
  -4  13   0  118.21   31.83 
   3 -13   0  122.07   42.78 
  -3  13   0  185.43   43.78 
  -3  13   0   93.83    9.60 
   2 -13   0   49.31   28.24 
   2 -13   0   66.34    5.15 
  -2  13   0   51.46   24.69 
  -2  13   0  119.45  101.52 
   1 -13   0   18.51    3.26 
   1 -13   0    9.44   24.04 
  -1  13   0   15.84   21.37 
   1 -13   0  161.59  147.27 
  -1  13   0   54.28   88.97 
   0 -13   0   47.46    4.35 
   0 -13   0   34.28   25.28 
   0  13   0   55.74   22.51 
   0  13   0   16.65   17.34 
   0 -13   0   10.05   89.70 
   0  13   0   75.25   79.07 
  -1 -13   0    9.78    3.42 
  -1 -13   0   21.11   32.10 
   1  13   0  -26.72   26.32 
   1  13   0   -9.64   15.93 
  -1 -13   0   58.71   87.25 
   1  13   0  -61.12  110.12 
  -2 -13   0   18.44   31.48 
  -2 -13   0    5.84    2.75 
   2  13   0  -22.76   24.76 
   2  13   0    1.77   15.59 
  -2 -13   0   -9.77   81.39 
   2  13   0 -157.68  111.70 
  -3 -13   0  166.14   11.37 
  -3 -13   0  173.39   18.00 
  -3 -13   0  134.44   36.82 
   3  13   0  172.04   44.14 
   3  13   0  169.94   28.87 
  -3 -13   0  224.45  123.36 
   3  13   0  106.80  106.93 
  -4 -13   0   97.57    6.28 
  -4 -13   0   79.08   12.96 
  -4 -13   0  149.04   35.85 
  -4 -13   0   94.64    7.01 
   4  13   0   91.28   23.76 
   4  13   0   94.08   26.48 
  -4 -13   0  126.18  114.92 
   4  13   0  100.15  106.68 
  -5 -13   0    3.24    2.17 
  -5 -13   0    3.55    6.81 
  -5 -13   0   11.98   31.05 
  -5 -13   0    8.32    4.54 
   5  13   0   36.64   23.87 
   5  13   0    4.99   19.78 
  -5 -13   0 -163.39  108.46 
  -5 -13   0   23.88  214.54 
   5  13   0  124.31  100.23 
  -6 -13   0    4.31    3.54 
  -6 -13   0   -2.16    7.06 
  -6 -13   0   21.27   21.81 
   6  13   0   26.64   16.58 
   6  13   0    3.50   14.17 
  -6 -13   0   50.93  166.75 
  -6 -13   0    4.97   76.94 
   6  13   0  -24.59   63.34 
  -7 -13   0   29.07    5.85 
  -7 -13   0   27.62   28.22 
   7  13   0   51.17   20.95 
   7  13   0   31.38   23.98 
  -7 -13   0  -33.78  102.74 
  -8 -13   0   51.05    6.70 
   8  13   0   44.99   17.36 
  -8 -13   0  131.09  100.32 
  -9 -13   0   72.66    6.67 
   9  13   0   78.13   24.38 
 -10 -13   0   -5.16    6.73 
  10  13   0   15.30   22.22 
   4 -14   0   27.85   35.16 
   4 -14   0   20.13   13.07 
  -4  14   0   31.52   32.67 
  -4  14   0   22.99    5.80 
   3 -14   0   76.09   44.67 
  -3  14   0   42.50    5.62 
  -3  14   0   20.42   37.67 
   2 -14   0    5.01    2.70 
   2 -14   0   27.84   28.18 
  -2  14   0  -15.32   24.52 
   1 -14   0  104.98   32.17 
   1 -14   0   73.18    9.41 
  -1  14   0   68.42   26.36 
  -1  14   0   78.89   97.98 
   0 -14   0   -6.88   25.50 
   0 -14   0    5.51    3.39 
   0  14   0   -4.28   22.52 
   0  14   0   70.42   90.93 
  -1 -14   0  146.44   14.65 
  -1 -14   0  185.35   35.03 
   1  14   0  156.95   26.06 
   1  14   0  190.87   30.26 
  -1 -14   0  -57.79   85.03 
   1  14   0  138.90   89.75 
  -2 -14   0   -3.55   25.07 
  -2 -14   0    4.17    2.82 
   2  14   0    0.77   17.06 
   2  14   0  -13.30   20.18 
  -2 -14   0  -63.43   80.51 
   2  14   0  -22.92   88.45 
  -3 -14   0   48.32    5.94 
  -3 -14   0  116.40   30.67 
   3  14   0   68.12   21.03 
   3  14   0   69.26   22.71 
  -3 -14   0  146.92   90.29 
   3  14   0  122.01   86.62 
  -4 -14   0   12.70    3.71 
  -4 -14   0    9.15    4.60 
  -4 -14   0    4.17   14.32 
  -4 -14   0   -8.01   33.45 
   4  14   0   37.58   26.09 
   4  14   0   21.65   17.57 
  -4 -14   0  -28.43   93.86 
   4  14   0   26.93  115.13 
  -5 -14   0  101.78    8.77 
  -5 -14   0   30.09   34.83 
   5  14   0  101.61   25.60 
   5  14   0  144.35   31.38 
  -5 -14   0   46.38   84.37 
  -6 -14   0  137.13   43.57 
  -6 -14   0  164.80   11.58 
   6  14   0  102.20   27.26 
   6  14   0  144.95   30.43 
  -6 -14   0  234.16  124.57 
  -7 -14   0    2.77    3.90 
   7  14   0  -21.27   24.09 
  -8 -14   0   37.11    6.72 
   8  14   0   43.21   25.19 
  -9 -14   0   10.39    4.87 
   9  14   0  -16.22   23.71 
   3 -15   0   57.31   52.72 
   3 -15   0   56.66   14.06 
   2 -15   0    2.80   31.83 
  -2  15   0    8.32   26.01 
   1 -15   0   71.81   34.91 
   1 -15   0   16.38    3.59 
  -1  15   0   24.40   27.24 
   0 -15   0  164.64   39.32 
   0 -15   0  136.61   13.35 
   0  15   0  177.44   33.06 
  -1 -15   0   65.96    7.68 
  -1 -15   0  105.71   34.63 
   1  15   0   87.61   27.47 
  -2 -15   0   22.70   40.44 
  -2 -15   0    6.58    3.14 
   2  15   0   38.83   21.21 
   2  15   0    5.98   31.35 
  -3 -15   0    1.71    4.63 
  -3 -15   0   23.57   40.61 
   3  15   0   17.36   18.60 
   3  15   0   -4.19   29.20 
  -4 -15   0  -11.26   27.84 
  -4 -15   0  -11.82    4.76 
   4  15   0   28.71   21.29 
   4  15   0   -8.82   18.68 
  -5 -15   0   27.99   40.18 
  -5 -15   0   11.44    5.39 
   5  15   0    3.89   29.21 
  -6 -15   0  -39.64   36.17 
  -6 -15   0    3.27    3.98 
   6  15   0   20.07   28.68 
  -7 -15   0    2.28    4.21 
   7  15   0    4.01   20.55 
  -8 -15   0  109.51    9.33 
   8  15   0   78.34   23.50 
   1 -16   0  124.50   41.38 
  -1  16   0   72.24   32.88 
   0 -16   0    0.54   47.30 
   0 -16   0   14.53    4.98 
   0  16   0   17.64   36.70 
  -1 -16   0   21.04    4.79 
  -1 -16   0   41.05   34.89 
   1  16   0   11.09   26.01 
  -2 -16   0   40.54   47.38 
   2  16   0   19.18   24.93 
  -3 -16   0   -0.88    3.40 
  -3 -16   0    4.40   33.30 
   3  16   0   17.04   22.61 
  -4 -16   0   57.83    5.61 
  -4 -16   0   66.79   34.16 
   4  16   0   64.57   25.01 
  -5 -16   0   18.32    5.91 
  -5 -16   0  -25.58   43.49 
   5  16   0   35.15   34.01 
  -6 -16   0   51.52    8.84 
   6  16   0   45.93   32.94 
  -7 -16   0   17.34    6.74 
   7  16   0  -19.95   32.98 
  -2 -17   0   13.52    5.23 
   2  17   0  -14.39   26.34 
  -3 -17   0  105.59   11.16 
  -3 -17   0  186.51   56.82 
   3  17   0  168.01   42.75 
  -4 -17   0   56.51   49.09 
  -4 -17   0   48.82    5.39 
   4  17   0   45.80   36.17 
   3  17  -1   50.63   29.84 
   6  16  -1   27.20   22.95 
  -6 -16   1    5.51    4.70 
   5  16  -1    8.54   22.52 
  -5 -16   1    2.77    6.13 
   4  16  -1   27.77   31.29 
  -4 -16   1    6.70    5.89 
  -4 -16   1    1.50   54.74 
   3  16  -1  100.21   27.78 
  -3 -16   1   50.09    7.01 
  -3 -16   1   97.67   37.17 
   2  16  -1  -11.99   35.00 
  -2 -16   1  -10.68   45.17 
  -2 -16   1   -1.90    4.76 
   1  16  -1   33.67   26.27 
  -1 -16   1   15.03   33.94 
  -1 -16   1   38.32    5.52 
   0  16  -1   78.23   30.80 
   0 -16   1   71.39    9.06 
   0 -16   1  108.44   52.94 
  -1  16  -1  124.09   36.11 
   1 -16   1  152.53   43.69 
   8  15  -1   48.06   20.88 
  -8 -15   1   83.68    8.98 
   7  15  -1   88.03   31.30 
  -7 -15   1   84.20    7.82 
   6  15  -1   28.86   20.68 
  -6 -15   1    6.60    5.95 
   5  15  -1    8.45   28.59 
  -5 -15   1   73.63   41.19 
  -5 -15   1   -1.26    3.88 
   4  15  -1   15.57   18.31 
   4  15  -1   17.44   20.02 
  -4 -15   1    5.95    5.47 
  -4 -15   1  -22.96   27.39 
   3  15  -1   48.02   30.90 
   3  15  -1   10.15   25.22 
  -3 -15   1   21.39   40.86 
  -3 -15   1   20.05    5.18 
   2  15  -1  -50.48   27.28 
   2  15  -1  -38.33   30.20 
  -2 -15   1   22.22   42.27 
  -2 -15   1    3.03    4.45 
   1  15  -1   26.75   23.67 
  -1 -15   1   57.76   32.36 
  -1 -15   1   11.30    4.46 
   0  15  -1    5.68   24.50 
   0 -15   1   12.09    4.08 
   0 -15   1  -46.05   41.35 
  -1  15  -1  264.39   39.10 
   1 -15   1  243.42   21.88 
   1 -15   1  237.06   52.34 
  -2  15  -1   76.03   30.81 
   2 -15   1   76.82   36.12 
   3 -15   1    3.56   48.49 
   9  14  -1   28.79   23.47 
  -9 -14   1   30.22    5.62 
   8  14  -1   50.73   24.04 
  -8 -14   1   54.21    7.70 
   7  14  -1   11.56   23.60 
  -7 -14   1   29.69    6.47 
   6  14  -1   67.56   20.42 
  -6 -14   1   49.32    5.51 
  -6 -14   1   12.95   22.95 
   5  14  -1   -2.94   23.89 
   5  14  -1    0.79   15.59 
  -5 -14   1    0.71    5.18 
  -5 -14   1   -1.15   32.03 
  -5 -14   1   66.50   81.01 
   4  14  -1   38.68   26.16 
   4  14  -1   36.31   17.85 
  -4 -14   1   30.71   35.37 
  -4 -14   1   59.35    5.72 
  -4 -14   1   46.62   10.75 
   4  14  -1   44.49  111.45 
  -4 -14   1  231.87   91.86 
   3  14  -1  158.00   29.17 
   3  14  -1  200.76   29.96 
  -3 -14   1  174.93   12.12 
  -3 -14   1  203.02   35.25 
   3  14  -1  112.61   86.58 
  -3 -14   1  252.83  133.47 
   2  14  -1   70.09   22.46 
   2  14  -1   47.15   25.00 
  -2 -14   1   50.47    5.53 
  -2 -14   1   51.92   27.71 
   2  14  -1   35.46   85.17 
  -2 -14   1  -51.78  119.87 
   1  14  -1   16.04   21.36 
   1  14  -1   34.27   19.28 
  -1 -14   1   43.32    5.57 
  -1 -14   1   74.59   29.88 
   1  14  -1  163.61   87.88 
  -1 -14   1   10.74   94.64 
   0  14  -1  401.18   41.99 
   0 -14   1  326.14   27.09 
   0 -14   1  354.28   71.08 
   0  14  -1  317.20  108.48 
  -1  14  -1  226.21   42.71 
   1 -14   1  143.85   43.72 
   1 -14   1  126.88   11.24 
  -1  14  -1   48.97  140.59 
  -2  14  -1   29.99   25.29 
   2 -14   1  -32.44   28.07 
  -3  14  -1    5.46   36.77 
  -3  14  -1    8.82    3.09 
   3 -14   1   -8.37   43.65 
  -4  14  -1   95.13   33.50 
   4 -14   1   47.61   38.77 
   9  13  -1   17.47   19.66 
  -9 -13   1    7.46    4.51 
   8  13  -1   -5.97   13.71 
  -8 -13   1   -4.64    3.91 
   7  13  -1   12.14   15.82 
  -7 -13   1   14.33   18.76 
  -7 -13   1   10.69    5.59 
  -7 -13   1 -103.81   93.93 
   6  13  -1   75.44   25.29 
   6  13  -1  133.85   26.72 
  -6 -13   1  106.32   31.55 
  -6 -13   1  133.76   14.51 
  -6 -13   1  154.63   11.53 
   6  13  -1  202.61   97.32 
  -6 -13   1 -208.32  177.96 
  -6 -13   1  151.14  107.86 
   5  13  -1  272.26   33.26 
   5  13  -1  208.92   25.70 
  -5 -13   1  212.12   23.87 
  -5 -13   1  243.75   17.07 
  -5 -13   1  238.26   20.09 
  -5 -13   1  245.97   38.94 
   5  13  -1  175.43  106.04 
  -5 -13   1  217.35   91.60 
   4  13  -1   42.96   23.70 
   4  13  -1   16.47   21.19 
  -4 -13   1   35.42   31.42 
  -4 -13   1   38.29   11.20 
  -4 -13   1   28.87    5.22 
  -4 -13   1   34.90    2.97 
   4  13  -1   95.64  101.87 
  -4 -13   1   61.28  114.28 
   3  13  -1  253.49   31.98 
   3  13  -1  163.76   32.66 
  -3 -13   1  246.24   18.01 
  -3 -13   1  202.96   39.34 
   3  13  -1  216.29  116.67 
  -3 -13   1  113.47  117.48 
   2  13  -1  771.17   57.16 
   2  13  -1  609.23   60.53 
  -2 -13   1  745.01   61.54 
  -2 -13   1  728.65   58.76 
   2  13  -1  682.58  120.57 
  -2 -13   1  513.16  145.49 
   1  13  -1    5.09   15.38 
   1  13  -1   23.94   19.19 
  -1 -13   1   14.44   23.34 
  -1 -13   1    9.96    3.80 
   1  13  -1  169.97  112.69 
  -1 -13   1  -45.60   87.45 
   0  13  -1    5.47   19.63 
   0  13  -1   -6.15   15.85 
   0 -13   1  -15.73   23.17 
   0 -13   1   11.96    3.69 
   0  13  -1  -50.21   80.29 
   0 -13   1  138.87  145.02 
  -1  13  -1  281.77   41.42 
   1 -13   1  213.62   44.97 
  -1  13  -1  267.35  129.06 
   1 -13   1  171.93  115.06 
  -2  13  -1   38.33   23.67 
   2 -13   1   57.12   28.97 
  -2  13  -1   48.03   89.51 
   2 -13   1 -244.37  160.78 
  -3  13  -1   75.72    8.38 
  -3  13  -1   67.96   27.67 
   3 -13   1  118.66   32.85 
  -3  13  -1 -134.31   94.77 
  -4  13  -1   96.57   30.49 
  -4  13  -1   79.73    7.25 
   4 -13   1   90.10   33.01 
  -5  13  -1   67.19   34.21 
  -5  13  -1   62.73    6.35 
   5 -13   1   30.49   33.50 
  10  12  -1   17.67   13.87 
 -10 -12   1   35.16    7.16 
   9  12  -1   17.04   16.48 
  -9 -12   1    4.77    4.13 
   8  12  -1   66.90   20.01 
  -8 -12   1   39.83   21.84 
  -8 -12   1   34.17    9.78 
  -8 -12   1   55.52    5.55 
  -8 -12   1  -54.50   53.77 
   7  12  -1  289.90   27.62 
   7  12  -1  282.65   27.97 
  -7 -12   1  243.19   19.52 
  -7 -12   1  248.87   39.58 
  -7 -12   1  235.07   26.87 
  -7 -12   1  265.35   16.79 
  -7 -12   1 -347.18  271.13 
  -7 -12   1  142.10   69.70 
   6  12  -1   52.67   13.83 
   6  12  -1   37.12   15.19 
  -6 -12   1   13.09   14.34 
  -6 -12   1   31.87    9.96 
  -6 -12   1   32.99    5.53 
  -6 -12   1   49.55   19.59 
   6  12  -1   40.92   57.32 
  -6 -12   1   86.07  234.90 
  -6 -12   1   42.70   66.39 
   5  12  -1   11.22   14.43 
   5  12  -1    6.67    3.74 
   5  12  -1   14.60   16.98 
  -5 -12   1    9.10    1.52 
  -5 -12   1   -7.57   17.05 
  -5 -12   1  -11.50   19.82 
  -5 -12   1    5.68    9.32 
   5  12  -1  -38.39   59.25 
  -5 -12   1  -62.65  187.66 
  -5 -12   1   98.62   93.28 
   4  12  -1   73.24   17.44 
   4  12  -1   37.91    5.64 
   4  12  -1    7.74   18.82 
  -4 -12   1   62.82   22.06 
  -4 -12   1   36.16    2.90 
  -4 -12   1   43.60   10.71 
  -4 -12   1   34.34   22.22 
  -4 -12   1   32.17    4.06 
   4  12  -1  -21.04   86.78 
  -4 -12   1   98.22   97.90 
   3  12  -1  292.45   46.55 
   3  12  -1  320.81   33.12 
  -3 -12   1  313.64   25.12 
  -3 -12   1  302.22   38.32 
  -3 -12   1  335.70   36.82 
  -3 -12   1  362.15   20.64 
   3  12  -1  409.95   92.60 
  -3 -12   1  550.54  128.13 
   2  12  -1   -5.89   22.13 
   2  12  -1    7.38   19.38 
  -2 -12   1   -4.09   27.01 
  -2 -12   1   -9.39   22.49 
  -2 -12   1   -4.23    3.60 
   2  12  -1  -68.04   87.10 
  -2 -12   1  177.37  111.03 
   1  12  -1  136.10   20.90 
   1  12  -1  169.22   30.36 
  -1 -12   1  162.69   34.56 
  -1 -12   1  139.82   24.62 
  -1 -12   1  134.42    9.12 
   1  12  -1  158.33   98.99 
  -1 -12   1  269.02   92.95 
   0  12  -1   31.40   19.18 
   0  12  -1   11.94   20.48 
   0 -12   1  -15.48   21.99 
   0 -12   1  -11.63   25.79 
   0  12  -1   43.41   76.85 
   0 -12   1  273.28  126.24 
  -1  12  -1   15.28   26.81 
  -1  12  -1   -2.24   14.60 
   1 -12   1   11.22   31.90 
   1 -12   1   39.63   21.60 
  -1  12  -1   31.77  106.60 
   1 -12   1   29.30   90.75 
  -2  12  -1   49.38   29.91 
  -2  12  -1   39.57    4.66 
   2 -12   1    7.93   32.69 
  -2  12  -1  270.32  124.00 
   2 -12   1  169.49  153.32 
  -3  12  -1  418.24   30.44 
  -3  12  -1  446.78   46.45 
   3 -12   1  471.16   52.95 
  -3  12  -1  241.91   89.97 
   3 -12   1  272.44  168.67 
  -4  12  -1  169.07   12.99 
  -4  12  -1   65.74   37.74 
   4 -12   1  156.43   41.42 
   4 -12   1  -80.85  119.24 
  -5  12  -1  442.22   37.72 
  -5  12  -1  479.83   82.84 
   5 -12   1  398.88   58.45 
  -6  12  -1   79.48   34.38 
  -6  12  -1   91.73   11.79 
   6 -12   1  153.78   19.28 
   6 -12   1   30.21   44.30 
  10  11  -1    7.39   13.86 
 -10 -11   1    6.52    4.35 
   9  11  -1   -4.89   13.88 
  -9 -11   1   -0.43    3.69 
  -9 -11   1   20.86   17.33 
   8  11  -1   59.88   16.07 
   8  11  -1   72.01   17.78 
  -8 -11   1   60.94   20.80 
  -8 -11   1   60.00   18.50 
  -8 -11   1   60.05    5.59 
  -8 -11   1   59.78   10.50 
  -8 -11   1  107.24   73.94 
  -8 -11   1  -52.77   65.47 
   7  11  -1   62.24   16.88 
   7  11  -1   45.09   18.17 
   7  11  -1   60.01    6.21 
  -7 -11   1   46.99    6.14 
  -7 -11   1   59.82   18.45 
  -7 -11   1   44.49    9.35 
  -7 -11   1   82.34   22.25 
  -7 -11   1 -272.78  218.33 
  -7 -11   1   60.19   76.76 
   6  11  -1   21.73   13.14 
   6  11  -1   13.11    4.97 
   6  11  -1    6.51   15.41 
  -6 -11   1    4.81    4.45 
  -6 -11   1   -2.57   15.07 
  -6 -11   1    3.72    7.12 
  -6 -11   1    2.77   17.22 
  -6 -11   1   14.39  192.33 
  -6 -11   1  -63.77   77.09 
   5  11  -1   24.64    5.17 
   5  11  -1   14.84   18.17 
   5  11  -1   20.49   16.74 
  -5 -11   1   40.21    5.14 
  -5 -11   1   32.72    8.22 
  -5 -11   1   42.13   19.53 
  -5 -11   1   16.50   21.66 
   5  11  -1    6.02   71.92 
  -5 -11   1  -36.96  115.59 
  -5 -11   1   35.20   83.55 
   4  11  -1  340.94   30.59 
   4  11  -1  399.96   28.21 
   4  11  -1  430.02   33.52 
  -4 -11   1  325.91   35.32 
  -4 -11   1  441.06   42.84 
  -4 -11   1  384.28   24.53 
  -4 -11   1  373.01   19.82 
  -4 -11   1  290.90   30.35 
   4  11  -1  435.51   97.37 
  -4 -11   1  364.92   84.09 
  -4 -11   1  528.26  140.07 
   3  11  -1   58.29   18.92 
   3  11  -1   38.88   15.74 
  -3 -11   1   41.51    3.36 
  -3 -11   1   45.83    4.83 
  -3 -11   1   24.06   20.78 
  -3 -11   1   63.24   19.78 
   3  11  -1   85.78   59.42 
  -3 -11   1   59.36   86.55 
   2  11  -1   20.42   15.80 
   2  11  -1   24.55   18.65 
  -2 -11   1    0.68    3.64 
  -2 -11   1   10.48   17.58 
  -2 -11   1    6.05   14.67 
   2  11  -1    0.00   50.00 
  -2 -11   1   -6.25   63.03 
   1  11  -1    2.25   22.13 
   1  11  -1   -7.74   13.33 
  -1 -11   1   25.43   25.97 
  -1 -11   1   20.18   15.88 
   1  11  -1   93.61   81.98 
  -1 -11   1  -24.90   65.53 
   0  11  -1   72.37   17.40 
   0  11  -1   83.51   20.16 
   0 -11   1   45.17   18.60 
   0 -11   1   57.52   22.51 
   0  11  -1   88.38   64.30 
   0 -11   1  -17.56   70.09 
  -1  11  -1    9.42   19.43 
  -1  11  -1   -2.96   24.43 
   1 -11   1    7.96   28.26 
   1 -11   1   10.44   23.13 
  -1  11  -1  -32.22   89.95 
   1 -11   1   66.89  116.15 
  -2  11  -1    5.30    3.01 
  -2  11  -1   -5.52   14.64 
  -2  11  -1   19.16   28.26 
   2 -11   1   31.91   29.63 
   2 -11   1    1.60   18.05 
  -2  11  -1   38.48  101.20 
   2 -11   1  -17.23   86.12 
  -3  11  -1   42.77   22.36 
  -3  11  -1   42.48    5.09 
   3 -11   1    9.53   21.72 
   3 -11   1   47.09   23.61 
  -3  11  -1    3.19   86.69 
   3 -11   1   16.10  103.54 
  -4  11  -1    5.07    4.76 
  -4  11  -1   21.61   31.83 
   4 -11   1   -9.80   31.23 
  -4  11  -1  -11.55  114.74 
   4 -11   1  -12.58  110.32 
  -5  11  -1   45.87    7.00 
  -5  11  -1   39.75   36.14 
   5 -11   1   30.80   26.16 
   5 -11   1  -93.35  118.78 
  -6  11  -1  126.25   43.65 
  -6  11  -1  156.81   13.01 
   6 -11   1  205.30   44.03 
  -7  11  -1    9.69    7.91 
  -7  11  -1   27.23   31.85 
   7 -11   1    5.42   30.86 
   7 -11   1   24.88   12.45 
 -11 -10   1    0.68    4.24 
  10  10  -1    3.69   11.93 
 -10 -10   1    4.19    5.79 
   9  10  -1    7.75   12.58 
  -9 -10   1    2.65    4.90 
  -9 -10   1    9.50   13.04 
  -9 -10   1  -35.31   49.01 
   8  10  -1   21.88   11.89 
   8  10  -1   20.51    4.60 
   8  10  -1    9.09   13.99 
  -8 -10   1    4.28   15.24 
  -8 -10   1   18.87   13.32 
  -8 -10   1   12.11    4.89 
  -8 -10   1   11.25    8.34 
  -8 -10   1  -52.21   57.68 
  -8 -10   1   36.98   53.85 
  -8 -10   1  261.35  191.01 
   7  10  -1  256.10   37.51 
   7  10  -1  362.85   29.13 
   7  10  -1  318.39   23.37 
  -7 -10   1  313.89   33.18 
  -7 -10   1  324.96   18.16 
  -7 -10   1  264.88   26.75 
  -7 -10   1  304.85   28.08 
  -7 -10   1  -23.23  202.60 
  -7 -10   1  325.57   66.61 
  -7 -10   1  433.16   82.59 
   6  10  -1  159.02   13.10 
   6  10  -1  164.12   22.50 
   6  10  -1  137.99   17.47 
  -6 -10   1  125.61   24.59 
  -6 -10   1  185.01   19.27 
  -6 -10   1  143.28   14.36 
  -6 -10   1  186.63    9.65 
  -6 -10   1   18.56  168.83 
  -6 -10   1  128.68   50.91 
   5  10  -1  196.95  143.02 
   5  10  -1   12.28   14.10 
   5  10  -1    3.86    3.09 
  -5 -10   1   16.58   18.84 
  -5 -10   1   -1.15    3.94 
  -5 -10   1   10.04   11.27 
  -5 -10   1    6.53    7.21 
   5  10  -1  141.40   64.38 
  -5 -10   1   63.03  142.26 
  -5 -10   1   41.29   47.95 
   4  10  -1  138.35   21.35 
   4  10  -1  110.94   16.56 
   4  10  -1  118.25    7.32 
  -4 -10   1  120.02   17.96 
  -4 -10   1   99.81   11.51 
  -4 -10   1   97.59    6.52 
  -4 -10   1  107.30   24.04 
   4  10  -1   39.13   64.99 
  -4 -10   1   71.75   53.58 
  -4 -10   1  -29.02  143.85 
   3  10  -1   48.88   12.75 
   3  10  -1   23.53   17.99 
  -3 -10   1   30.10    2.49 
  -3 -10   1   42.05   22.25 
  -3 -10   1   32.74    3.51 
  -3 -10   1   46.89   19.16 
   3  10  -1   30.77   64.39 
  -3 -10   1   61.11   53.81 
   2  10  -1   95.93   22.17 
   2  10  -1   29.87   17.95 
  -2 -10   1   68.65   24.13 
  -2 -10   1   68.52    5.29 
  -2 -10   1   76.70   16.83 
  -2 -10   1   69.61    5.15 
   2  10  -1  -24.01   64.58 
  -2 -10   1   65.58   57.57 
   1  10  -1  345.38   33.05 
   1  10  -1  304.97   31.17 
  -1 -10   1  362.89   34.72 
  -1 -10   1  324.84   34.87 
   1  10  -1  330.99   72.12 
  -1 -10   1  314.09   97.03 
   0  10  -1  140.88   19.82 
   0  10  -1  137.90   22.67 
   0 -10   1  175.27   26.23 
   0 -10   1  144.93   22.29 
   0  10  -1   86.78   57.65 
   0 -10   1  122.64   70.62 
  -1  10  -1    6.87   14.01 
  -1  10  -1  -25.38   15.89 
   1 -10   1   -4.61   17.00 
   1 -10   1   -7.20   14.79 
  -1  10  -1   -1.48   61.02 
   1 -10   1   -8.11   66.87 
  -2  10  -1    8.05    3.24 
  -2  10  -1   18.13   14.69 
  -2  10  -1   23.52   18.09 
   2 -10   1   32.78   18.69 
   2 -10   1   20.66   18.98 
  -2  10  -1   12.39   70.75 
   2 -10   1   87.04   83.78 
  -3  10  -1   78.94   28.96 
  -3  10  -1   95.42    7.59 
   3 -10   1   81.16   28.67 
   3 -10   1  127.34   32.91 
  -3  10  -1  304.18  117.33 
   3 -10   1  -62.97   89.24 
  -4  10  -1   -1.63    4.62 
  -4  10  -1   -3.20   19.14 
   4 -10   1   -4.90   21.66 
   4 -10   1   -8.85   27.43 
  -4  10  -1   33.99   85.23 
   4 -10   1   30.10  142.91 
  -5  10  -1  137.14   28.15 
  -5  10  -1   85.07    7.37 
   5 -10   1  130.39   29.59 
   5 -10   1   76.99    6.17 
   5 -10   1   64.59   34.04 
  -5  10  -1   66.56   93.59 
   5 -10   1   43.37  159.37 
  -6  10  -1  120.07   30.12 
  -6  10  -1  104.76    9.41 
   6 -10   1  131.57   31.16 
   6 -10   1  325.99  181.25 
  -7  10  -1   73.01   40.11 
  -7  10  -1   93.01    9.96 
   7 -10   1   95.41   41.26 
   7 -10   1  110.62   18.83 
   7 -10   1    1.85  193.29 
  -8  10  -1   22.08   33.79 
  -8  10  -1   -7.56    8.42 
   8 -10   1    9.50   17.85 
   8 -10   1    7.70   26.25 
 -11  -9   1   83.20    7.64 
  10   9  -1   -5.72   11.30 
 -10  -9   1    1.26    3.89 
   9   9  -1   -6.46    8.21 
   9   9  -1    3.03    9.84 
  -9  -9   1    3.54   11.09 
  -9  -9   1    2.04    3.25 
  -9  -9   1   13.14   10.28 
  -9  -9   1  -27.86   69.64 
  -9  -9   1  -13.25   54.55 
   8   9  -1   47.63   13.47 
   8   9  -1   56.08   13.49 
  -8  -9   1   35.89   13.44 
  -8  -9   1   47.80    4.69 
  -8  -9   1   39.13    7.55 
  -8  -9   1   50.19   13.01 
  -8  -9   1   31.77  146.56 
  -8  -9   1   89.51   53.92 
  -8  -9   1   42.60   53.37 
   7   9  -1   93.07   16.52 
   7   9  -1  118.83    8.81 
   7   9  -1  142.19   17.74 
  -7  -9   1  116.46   18.69 
  -7  -9   1  112.57   10.89 
  -7  -9   1  118.03   17.31 
  -7  -9   1  116.92    7.77 
  -7  -9   1   78.37   55.60 
  -7  -9   1   55.79  190.09 
  -7  -9   1  136.16   50.44 
   6   9  -1    8.12    4.02 
   6   9  -1   -9.82   13.56 
   6   9  -1    4.22    7.76 
  -6  -9   1   -6.20   15.10 
  -6  -9   1    8.15    3.96 
  -6  -9   1    6.47    6.94 
  -6  -9   1    9.91   13.42 
  -6  -9   1  -24.89   39.57 
  -6  -9   1   95.77  119.73 
   5   9  -1  197.50   12.72 
   5   9  -1  209.54   23.61 
   5   9  -1  211.96   19.58 
  -5  -9   1  193.18   21.96 
  -5  -9   1  190.20   24.05 
  -5  -9   1  209.31   11.28 
  -5  -9   1  176.60   18.82 
   5   9  -1  194.12   56.85 
  -5  -9   1  134.39   46.93 
  -5  -9   1  173.24  152.24 
   4   9  -1  878.33   59.68 
   4   9  -1  953.63   51.96 
   4   9  -1  796.76   84.76 
  -4  -9   1  902.77   47.53 
  -4  -9   1  955.40   64.92 
  -4  -9   1  914.62   73.20 
  -4  -9   1  960.54   67.69 
   4   9  -1  922.67  125.35 
  -4  -9   1 1009.61  123.37 
  -4  -9   1  563.46  172.38 
   3   9  -1  538.07   44.62 
   3   9  -1  463.13   36.04 
  -3  -9   1  491.51   22.97 
  -3  -9   1  507.22   45.71 
  -3  -9   1  504.76   37.54 
  -3  -9   1  472.98   27.34 
   3   9  -1  504.88   84.87 
  -3  -9   1  431.19   78.44 
  -3  -9   1  540.29  116.09 
   2   9  -1  546.16   42.88 
   2   9  -1  590.02   45.22 
  -2  -9   1  537.37   30.70 
  -2  -9   1  538.48   27.28 
  -2  -9   1  596.34   43.94 
  -2  -9   1  623.17   44.44 
   2   9  -1  592.76   89.79 
  -2  -9   1  728.26  106.37 
   1   9  -1  910.50   64.24 
   1   9  -1  868.82   97.84 
  -1  -9   1  903.25   63.12 
  -1  -9   1  903.62   69.41 
   1   9  -1  967.07  111.04 
  -1  -9   1  635.40  121.42 
   0   9  -1  631.59   47.81 
   0   9  -1  570.20   58.32 
   0  -9   1  644.33   51.15 
   0  -9   1  685.02   57.62 
   0   9  -1  704.72  104.56 
   0  -9   1  428.77  105.06 
  -1   9  -1  143.93   21.19 
  -1   9  -1  101.43    6.54 
  -1   9  -1   93.84   20.62 
   1  -9   1   77.10   22.94 
   1  -9   1  139.97   22.47 
  -1   9  -1  119.24   62.57 
   1  -9   1  120.38   89.02 
  -2   9  -1  313.94   18.66 
  -2   9  -1  342.50   31.78 
  -2   9  -1  261.86   31.56 
   2  -9   1  294.50   32.93 
   2  -9   1  267.46   33.96 
  -2   9  -1  315.10   80.12 
   2  -9   1  268.24  111.62 
  -3   9  -1   41.07   18.64 
  -3   9  -1   50.74    5.19 
   3  -9   1   54.17   20.54 
   3  -9   1   19.43   23.17 
  -3   9  -1   82.39   73.73 
  -3   9  -1   25.33   32.95 
   3  -9   1   92.81  110.92 
  -4   9  -1  119.01    7.89 
  -4   9  -1  111.81   25.01 
  -4   9  -1  159.97   31.24 
   4  -9   1  106.59   34.98 
   4  -9   1  103.06   25.34 
  -4   9  -1   37.63   80.48 
   4  -9   1   73.50  125.13 
  -5   9  -1   65.06    7.06 
  -5   9  -1   78.73   31.56 
   5  -9   1   80.35   34.27 
   5  -9   1   75.74    5.38 
   5  -9   1   46.40   30.64 
  -5   9  -1  163.39  127.82 
   5  -9   1   19.67  144.80 
  -6   9  -1  177.57   31.61 
  -6   9  -1  115.01    8.85 
   6  -9   1  108.24   28.49 
   6  -9   1   94.68   34.31 
   6  -9   1  115.42   10.06 
  -6   9  -1  145.97   94.48 
  -6   9  -1  -40.58   37.98 
   6  -9   1   70.40  104.47 
  -7   9  -1   -1.40    6.89 
  -7   9  -1   12.09   24.63 
   7  -9   1  -19.36   23.88 
   7  -9   1    3.80   14.06 
   7  -9   1    8.48   25.51 
   7  -9   1   12.88  117.79 
  -8   9  -1  135.59   34.08 
  -8   9  -1   92.08   11.10 
   8  -9   1  108.66   16.96 
   8  -9   1   78.86   30.70 
   8  -9   1  202.19  143.59 
 -11  -8   1   52.84    6.65 
  10   8  -1   62.75   18.53 
  10   8  -1   75.67   12.98 
 -10  -8   1   89.81    7.40 
 -10  -8   1   24.70   34.30 
   9   8  -1   10.85    9.62 
   9   8  -1   -2.03    7.71 
  -9  -8   1    5.68   10.32 
  -9  -8   1   -1.21    4.39 
  -9  -8   1   -4.13    8.19 
  -9  -8   1  -17.58   53.45 
  -9  -8   1   15.72   46.98 
   8   8  -1   72.82   11.88 
   8   8  -1  119.46   15.85 
  -8  -8   1  107.07    7.09 
  -8  -8   1   78.67   13.06 
  -8  -8   1   93.87   16.24 
  -8  -8   1  105.97   59.80 
  -8  -8   1   65.93   42.53 
  -8  -8   1   52.41  139.00 
   7   8  -1  153.61   19.14 
   7   8  -1  175.60   13.81 
   7   8  -1  169.35   17.99 
  -7  -8   1  165.57   14.57 
  -7  -8   1  198.09   11.46 
  -7  -8   1  161.53   17.51 
  -7  -8   1  169.23   19.32 
  -7  -8   1  164.34   40.80 
  -7  -8   1  344.25  137.29 
  -7  -8   1  180.66   49.69 
   6   8  -1  291.71   23.99 
   6   8  -1  271.24   21.81 
   6   8  -1  253.48   17.97 
  -6  -8   1  272.36   25.12 
  -6  -8   1  256.59   13.58 
  -6  -8   1  248.60   19.01 
  -6  -8   1  278.09   22.18 
  -6  -8   1  379.94  165.13 
  -6  -8   1  211.32   56.61 
   5   8  -1  437.39   27.97 
   5   8  -1  408.95   31.23 
   5   8  -1  423.49   33.81 
  -5  -8   1  441.58   38.45 
  -5  -8   1  428.10   33.93 
  -5  -8   1  387.71   30.75 
  -5  -8   1  459.74   21.36 
  -5  -8   1  527.14  155.77 
  -5  -8   1  426.08   72.45 
   4   8  -1  174.21   17.84 
   4   8  -1  170.97   10.73 
   4   8  -1  148.08   16.59 
  -4  -8   1  187.92   19.58 
  -4  -8   1  188.77    9.45 
  -4  -8   1  199.57   19.87 
  -4  -8   1  163.51   14.10 
   4   8  -1  121.42   39.34 
  -4  -8   1  203.80   56.85 
  -4  -8   1  219.29  119.56 
   3   8  -1  330.82   27.71 
   3   8  -1  305.41   27.02 
  -3  -8   1  320.87   28.13 
  -3  -8   1  286.75   27.24 
  -3  -8   1  340.61   15.72 
   3   8  -1  305.11   55.68 
  -3  -8   1  382.03  120.41 
  -3  -8   1  304.40   68.23 
   2   8  -1   17.51   15.65 
   2   8  -1   16.48   13.58 
  -2  -8   1   42.54   15.67 
  -2  -8   1   20.09   17.32 
   2   8  -1   32.18   48.07 
  -2  -8   1   46.81   57.45 
   1   8  -1   22.44   12.97 
   1   8  -1   28.48   14.72 
  -1  -8   1   39.71   14.61 
  -1  -8   1   40.91    2.67 
  -1  -8   1   44.22   12.83 
   1   8  -1    5.11   34.72 
  -1  -8   1  -23.28   42.11 
   0   8  -1 1227.17   97.34 
   0   8  -1 1199.37   98.06 
   0  -8   1 1309.35   93.25 
   0  -8   1 1240.49   84.35 
   0   8  -1 1052.37  143.36 
   0  -8   1 1197.38  140.08 
  -1   8  -1   33.09   12.62 
  -1   8  -1    0.87   12.81 
  -1   8  -1   30.97    2.99 
   1  -8   1   46.08   16.67 
   1  -8   1   29.07   13.96 
  -1   8  -1  -12.27   33.92 
  -1   8  -1  -21.89   46.06 
   1  -8   1   71.27   54.52 
  -2   8  -1   15.52    3.31 
  -2   8  -1    2.70   11.55 
  -2   8  -1  -20.34   24.38 
   2  -8   1    8.39   22.00 
   2  -8   1    6.26   13.88 
  -2   8  -1  -11.64   35.48 
  -2   8  -1   -1.53   77.05 
   2  -8   1 -107.77   60.65 
  -3   8  -1  991.56   55.84 
  -3   8  -1  823.45   63.92 
   3  -8   1  989.16   83.93 
   3  -8   1  883.95   64.50 
  -3   8  -1  915.92  133.10 
  -4   8  -1 1275.49   85.00 
  -4   8  -1 1258.46  100.01 
  -4   8  -1 1304.72  112.63 
   4  -8   1 1405.37  122.76 
   4  -8   1 1415.94   90.18 
  -4   8  -1 1049.67  224.83 
   4  -8   1  937.72  168.53 
  -5   8  -1   -8.27   18.43 
  -5   8  -1    3.42   17.97 
  -5   8  -1    4.07    4.78 
   5  -8   1   -0.65    1.64 
   5  -8   1   -6.04   17.07 
   5  -8   1   13.09   18.51 
  -5   8  -1  -47.33   78.57 
   5  -8   1   72.78   88.73 
  -6   8  -1   28.30   29.18 
  -6   8  -1   78.26    7.09 
   6  -8   1  129.31   25.52 
   6  -8   1   84.89    6.79 
  -6   8  -1  123.37  125.15 
   6  -8   1   19.72   99.21 
  -7   8  -1   28.97    7.42 
  -7   8  -1   11.65   22.47 
   7  -8   1   33.46   23.01 
   7  -8   1   40.60   10.90 
   7  -8   1   34.05    3.43 
   7  -8   1   39.67   23.65 
  -7   8  -1   28.53   90.71 
   7  -8   1    9.15   97.96 
  -8   8  -1   16.56   36.87 
  -8   8  -1   86.33    8.53 
   8  -8   1   66.80   14.33 
   8  -8   1  101.08   38.49 
   8  -8   1   94.60   38.04 
   8  -8   1  134.44  181.32 
  -9   8  -1   17.75   41.58 
  -9   8  -1    1.40    9.23 
   9  -8   1   14.27   18.31 
   9  -8   1    4.88   37.47 
   9  -8   1  -54.43  227.27 
 -12  -7   1   63.86    7.45 
 -11  -7   1   42.32    5.94 
  10   7  -1   54.15   11.59 
  10   7  -1   52.62    9.61 
 -10  -7   1   47.55   11.12 
 -10  -7   1   64.46    6.22 
 -10  -7   1  -15.86   29.73 
   9   7  -1  253.64   31.87 
   9   7  -1  290.18   37.25 
  -9  -7   1  279.29   26.50 
  -9  -7   1  253.05   23.65 
  -9  -7   1  319.08   18.46 
  -9  -7   1  318.03  259.92 
  -9  -7   1  203.67   58.58 
  -9  -7   1  121.40   36.24 
   8   7  -1  -19.54    6.85 
   8   7  -1    2.43    8.86 
  -8  -7   1   13.42    9.11 
  -8  -7   1   -6.38    9.21 
  -8  -7   1    1.12    2.72 
  -8  -7   1  -66.16  133.50 
  -8  -7   1   -3.82   40.31 
  -8  -7   1   11.37   30.86 
   7   7  -1   44.97    9.79 
   7   7  -1   45.04   10.96 
  -7  -7   1   42.55    3.94 
  -7  -7   1   42.52    8.58 
  -7  -7   1   46.34   11.38 
  -7  -7   1   42.48   12.84 
  -7  -7   1   53.32   40.53 
  -7  -7   1    5.73   33.01 
  -7  -7   1  148.12  118.31 
   6   7  -1   67.11   10.81 
   6   7  -1   50.01   11.73 
   6   7  -1   53.47    4.92 
  -6  -7   1   52.72    8.57 
  -6  -7   1   49.88    4.79 
  -6  -7   1   68.65   13.37 
  -6  -7   1   63.76   11.94 
  -6  -7   1   23.98   33.15 
  -6  -7   1  -98.48  134.73 
  -6  -7   1   27.42   35.91 
   5   7  -1  717.77   49.37 
   5   7  -1  819.88   62.82 
   5   7  -1  734.32   56.04 
  -5  -7   1  718.31   50.88 
  -5  -7   1  791.34   37.60 
  -5  -7   1  865.24   67.20 
  -5  -7   1  835.74   54.54 
  -5  -7   1  691.84  133.38 
  -5  -7   1  689.94   87.22 
   4   7  -1 2992.70  153.63 
   4   7  -1 2980.07  192.93 
   4   7  -1 2933.45  183.81 
  -4  -7   1 3092.10  190.84 
  -4  -7   1 2781.81  237.06 
  -4  -7   1 3012.36  137.03 
  -4  -7   1 2928.90  186.99 
   4   7  -1 3188.01  324.07 
  -4  -7   1 2914.38  389.99 
  -4  -7   1 3106.84  328.68 
   3   7  -1 3383.33  216.49 
   3   7  -1 3505.29  283.10 
   3   7  -1 3498.60  214.16 
  -3  -7   1 3570.18  168.27 
  -3  -7   1 3723.34  311.39 
  -3  -7   1 3478.64  215.48 
   3   7  -1 3312.57  386.49 
  -3  -7   1 3454.11  365.09 
  -3  -7   1 4022.50  469.13 
   2   7  -1 2059.27  124.50 
   2   7  -1 1970.84  228.82 
  -2  -7   1 2040.00  105.50 
  -2  -7   1 1978.05  136.37 
  -2  -7   1 2136.20  125.04 
   2   7  -1 1914.91  214.15 
  -2  -7   1 1918.95  248.18 
  -2  -7   1 2169.72  221.45 
   1   7  -1   19.42   15.33 
   1   7  -1   -2.32    8.72 
  -1  -7   1    5.82   16.57 
  -1  -7   1    8.84   10.26 
   1   7  -1  -15.70   42.82 
  -1  -7   1  104.57   38.81 
   0   7  -1  215.48   26.55 
   0   7  -1  292.00   28.37 
   0  -7   1  291.89   33.13 
   0  -7   1  298.86   29.91 
   0   7  -1  375.33   70.18 
   0  -7   1  257.79   72.30 
  -1   7  -1  912.01   47.75 
  -1   7  -1  975.62   66.10 
  -1   7  -1  923.90   60.48 
   1  -7   1  903.42   64.01 
   1  -7   1  935.06   73.25 
  -1   7  -1  875.25  110.82 
  -1   7  -1  711.13  115.53 
   1  -7   1  860.41  110.99 
  -2   7  -1   15.88    3.06 
  -2   7  -1   23.72   14.06 
  -2   7  -1   15.96   11.46 
   2  -7   1   31.70   14.14 
   2  -7   1    6.29   13.21 
  -2   7  -1   29.39   48.99 
   2  -7   1   51.01   56.05 
  -3   7  -1   26.23   14.86 
  -3   7  -1   38.28    8.38 
   3  -7   1   15.89   15.09 
   3  -7   1    0.00   18.20 
  -3   7  -1   39.73   51.63 
   3  -7   1   -5.08   79.86 
  -4   7  -1   56.33   17.56 
  -4   7  -1   57.91   17.73 
  -4   7  -1   92.07   10.72 
   4  -7   1   85.57   19.47 
   4  -7   1   66.96   18.08 
  -4   7  -1   92.88   66.77 
   4  -7   1  152.23   76.75 
  -5   7  -1  109.99    8.47 
  -5   7  -1   97.92   27.75 
  -5   7  -1  149.10   24.32 
   5  -7   1  106.20   22.32 
   5  -7   1  135.91   23.46 
   5  -7   1  142.53    7.02 
  -5   7  -1  -87.11   98.74 
   5  -7   1   33.56   77.45 
  -6   7  -1  282.79   39.12 
  -6   7  -1  310.14   18.77 
  -6   7  -1  307.98   34.24 
   6  -7   1  218.02   35.68 
   6  -7   1  277.47   17.63 
   6  -7   1  250.11   31.59 
  -6   7  -1   36.27   77.49 
   6  -7   1  561.38  134.79 
  -7   7  -1   11.09    4.68 
  -7   7  -1   62.45   30.55 
   7  -7   1   54.25   28.70 
   7  -7   1   22.49    9.29 
   7  -7   1   -1.86   26.30 
   7  -7   1 -109.52  129.12 
  -8   7  -1   11.11   22.55 
  -8   7  -1    2.41    5.11 
   8  -7   1    7.66    2.63 
   8  -7   1   33.83   21.69 
   8  -7   1   11.20   22.43 
   8  -7   1   -4.93   14.16 
  -8   7  -1  -25.83   92.27 
   8  -7   1   97.82  115.50 
  -9   7  -1    2.80    8.38 
  -9   7  -1   11.29   27.12 
   9  -7   1  -22.16   22.46 
   9  -7   1    5.94   17.03 
  12   6  -1   14.81   15.15 
 -12  -6   1   -2.28    5.31 
  11   6  -1   17.92    6.31 
  11   6  -1    9.51   13.44 
 -11  -6   1   30.54    5.42 
  10   6  -1   42.33    8.18 
  10   6  -1   25.02    7.05 
  10   6  -1   13.35   16.44 
 -10  -6   1   31.40    4.99 
 -10  -6   1   30.76    9.16 
 -10  -6   1  -13.53   37.21 
 -10  -6   1   -6.02   28.96 
   9   6  -1  952.02  103.84 
   9   6  -1  844.91   58.16 
   9   6  -1 1012.39   67.40 
  -9  -6   1  831.83   77.47 
  -9  -6   1  810.87   85.16 
  -9  -6   1  982.32   50.51 
  -9  -6   1  761.64   98.22 
  -9  -6   1  733.79  108.99 
  -9  -6   1  540.27  190.33 
   8   6  -1  303.06   29.71 
   8   6  -1  296.56   22.90 
  -8  -6   1  261.97   21.84 
  -8  -6   1  278.64   15.01 
  -8  -6   1  239.44   24.71 
  -8  -6   1  113.93  134.21 
  -8  -6   1  243.97   40.44 
  -8  -6   1  194.41   52.20 
   7   6  -1   12.67    7.93 
   7   6  -1   -5.64    6.23 
  -7  -6   1    7.33    7.90 
  -7  -6   1    5.91    2.55 
  -7  -6   1   11.02    7.39 
  -7  -6   1    8.33    8.37 
  -7  -6   1    0.00   26.63 
  -7  -6   1   59.44   39.28 
   6   6  -1    3.40    7.18 
   6   6  -1   -8.44    8.23 
  -6  -6   1   -7.36    7.47 
  -6  -6   1   13.07    6.82 
  -6  -6   1    2.27    3.16 
  -6  -6   1   -0.53    8.78 
  -6  -6   1   18.36   31.33 
  -6  -6   1    1.32   25.39 
   5   6  -1    4.99    8.17 
   5   6  -1   12.05    2.42 
   5   6  -1   16.61    9.37 
  -5  -6   1    8.96    9.75 
  -5  -6   1   26.26    9.21 
  -5  -6   1   17.50    3.28 
  -5  -6   1   15.94    6.49 
  -5  -6   1   -9.96   74.00 
  -5  -6   1   15.03   27.99 
   4   6  -1   83.49   12.32 
   4   6  -1  118.23   13.55 
   4   6  -1   95.67    6.06 
  -4  -6   1  115.60   14.38 
  -4  -6   1   95.33    5.45 
  -4  -6   1   85.73   12.41 
  -4  -6   1   97.28    9.92 
   4   6  -1   58.72   30.61 
  -4  -6   1   69.07   87.60 
  -4  -6   1   29.49   31.84 
   3   6  -1  657.04   43.02 
   3   6  -1  637.99   43.13 
   3   6  -1  696.56   38.11 
  -3  -6   1  670.99   46.49 
  -3  -6   1  618.14   45.35 
  -3  -6   1  663.12   31.73 
  -3  -6   1  691.44   43.92 
   3   6  -1  616.26   69.53 
  -3  -6   1  409.75  109.31 
  -3  -6   1  567.30   74.22 
   2   6  -1 4204.31  268.95 
   2   6  -1 4492.02  302.97 
  -2  -6   1 4530.36  347.74 
  -2  -6   1 4293.56  270.30 
   2   6  -1 4367.92  462.41 
  -2  -6   1 4128.27  562.43 
  -2  -6   1 4142.43  440.17 
   1   6  -1   26.77   13.90 
   1   6  -1   18.95    8.52 
  -1  -6   1   19.77    9.12 
  -1  -6   1   12.14    1.46 
  -1  -6   1   29.90   15.20 
   1   6  -1   19.83   36.46 
  -1  -6   1   -3.86   27.04 
   0   6  -1 1113.91   74.24 
   0   6  -1 1156.24   62.92 
   0   6  -1 1154.80   79.01 
   0  -6   1 1152.12   75.07 
   0  -6   1 1320.71   79.03 
   0   6  -1 1281.45  136.80 
   0   6  -1 1136.79  149.52 
   0  -6   1 1188.74  136.61 
  -1   6  -1 1657.91   87.09 
  -1   6  -1 1620.84  122.54 
  -1   6  -1 1659.21  116.62 
   1  -6   1 1768.47  111.37 
   1  -6   1 1752.86  122.08 
  -1   6  -1 1400.61  176.71 
   1  -6   1 1856.57  185.20 
  -2   6  -1  123.77   16.31 
  -2   6  -1  109.02   21.20 
  -2   6  -1  134.37   11.79 
   2  -6   1  142.52   23.01 
   2  -6   1  148.76   18.68 
  -2   6  -1  102.63   63.24 
   2  -6   1  161.14   75.46 
  -3   6  -1 1620.19   81.79 
  -3   6  -1 1407.20  118.08 
   3  -6   1 1610.90  120.22 
   3  -6   1 1664.73  100.14 
  -3   6  -1 1535.43  188.62 
   3  -6   1 1427.31  176.25 
  -4   6  -1 1702.18   93.82 
  -4   6  -1 1774.35  107.26 
  -4   6  -1 1659.63  130.68 
   4  -6   1 1725.43  111.27 
   4  -6   1 1574.95  106.74 
  -4   6  -1 1319.73  175.60 
  -5   6  -1  433.48   24.15 
  -5   6  -1  430.25   38.15 
  -5   6  -1  482.31   42.64 
   5  -6   1  388.26   40.60 
   5  -6   1  432.28   20.07 
   5  -6   1  474.41   38.80 
  -5   6  -1  406.48   93.20 
   5  -6   1  478.17  117.17 
  -6   6  -1   49.29   24.44 
  -6   6  -1   22.78   17.96 
  -6   6  -1   34.76    5.95 
   6  -6   1   29.24   23.49 
   6  -6   1   39.55    2.90 
   6  -6   1   59.62   18.69 
  -6   6  -1  122.35  111.69 
   6  -6   1 -118.66   69.89 
  -7   6  -1  264.38   17.99 
  -7   6  -1  284.42   32.85 
  -7   6  -1  219.29   38.72 
   7  -6   1  260.47   31.60 
   7  -6   1  278.67   22.36 
   7  -6   1  243.67   16.87 
   7  -6   1  242.02   36.04 
  -7   6  -1  233.30  101.00 
   7  -6   1  134.69  117.84 
  -8   6  -1   31.94   29.84 
  -8   6  -1   44.76    8.04 
   8  -6   1   44.86   15.00 
   8  -6   1   32.81    3.73 
   8  -6   1   26.67   27.61 
   8  -6   1   37.91   27.36 
   8  -6   1  -29.82  128.54 
  -9   6  -1   17.20    6.21 
  -9   6  -1   28.38   24.15 
   9  -6   1   23.40   29.08 
   9  -6   1    8.48   23.65 
   9  -6   1    9.36   16.30 
 -10   6  -1    4.95    9.71 
  10  -6   1   24.22   23.48 
  10  -6   1   -6.72   13.49 
  12   5  -1   50.15   22.89 
 -12  -5   1   40.01    5.76 
 -12  -5   1   55.16    6.42 
  11   5  -1   79.19   21.38 
  11   5  -1   68.53   12.71 
 -11  -5   1  105.75    8.82 
 -11  -5   1   94.82    7.42 
  10   5  -1   11.72    7.10 
  10   5  -1   23.83   12.30 
  10   5  -1   24.41    9.30 
 -10  -5   1    8.65    4.22 
 -10  -5   1    1.41    7.09 
 -10  -5   1    5.06    4.58 
 -10  -5   1   25.60   36.70 
 -10  -5   1   15.67   38.04 
   9   5  -1    3.54   14.45 
   9   5  -1   -1.51    4.91 
   9   5  -1   16.29    8.11 
  -9  -5   1    3.34   10.53 
  -9  -5   1    2.78    7.33 
  -9  -5   1   -1.18    3.86 
  -9  -5   1    5.28    4.14 
  -9  -5   1   70.23  141.45 
  -9  -5   1  -40.62   27.90 
  -9  -5   1   16.89   48.17 
   8   5  -1   15.39    7.28 
   8   5  -1   11.71    9.27 
   8   5  -1   15.27    9.27 
  -8  -5   1   20.48    9.13 
  -8  -5   1   14.93    9.37 
  -8  -5   1   16.71    4.03 
  -8  -5   1   -4.22   49.10 
  -8  -5   1  -18.35   26.32 
   7   5  -1  851.27   64.27 
   7   5  -1  825.95   56.47 
  -7  -5   1  823.70   63.09 
  -7  -5   1  877.99   45.62 
  -7  -5   1  863.17   40.06 
  -7  -5   1  815.73   56.42 
  -7  -5   1  930.58  107.12 
  -7  -5   1  868.70  107.99 
   6   5  -1  218.44   27.71 
   6   5  -1  263.27   22.57 
  -6  -5   1  246.08   13.23 
  -6  -5   1  258.30   21.67 
  -6  -5   1  262.06   18.34 
  -6  -5   1  232.80   11.91 
  -6  -5   1  227.42   16.94 
  -6  -5   1  244.50   41.26 
  -6  -5   1  136.35   36.19 
   5   5  -1  297.95   22.03 
   5   5  -1  294.45   25.28 
   5   5  -1  291.22   17.75 
  -5  -5   1  318.10   23.93 
  -5  -5   1  298.88   20.25 
  -5  -5   1  313.29   23.84 
  -5  -5   1  283.33   14.22 
  -5  -5   1  225.20   36.82 
  -5  -5   1  231.65   37.97 
   4   5  -1  584.31   40.97 
   4   5  -1 1329.79  928.74 
   4   5  -1  597.68   41.90 
  -4  -5   1  664.64   47.01 
  -4  -5   1  644.77   44.40 
  -4  -5   1  655.67   40.92 
  -4  -5   1  688.37   30.24 
   3   5  -1  323.53   23.72 
   3   5  -1  295.94   16.17 
   3   5  -1  274.48   20.44 
  -3  -5   1  286.99   21.06 
  -3  -5   1  262.35   20.24 
  -3  -5   1  320.04   22.97 
  -3  -5   1  261.45   14.23 
   3   5  -1  311.30   43.79 
  -3  -5   1  264.66   68.48 
  -3  -5   1  285.00   39.92 
   2   5  -1  104.04   13.49 
   2   5  -1  121.44   12.56 
  -2  -5   1  144.34   13.67 
  -2  -5   1  116.42   12.30 
   2   5  -1  131.68   26.34 
  -2  -5   1  106.93   33.94 
  -2  -5   1   80.21   46.03 
   1   5  -1   -0.95    7.95 
   1   5  -1   -0.28   10.01 
  -1  -5   1    9.29    1.05 
  -1  -5   1    8.73   10.62 
  -1  -5   1   27.10    9.77 
   1   5  -1   -9.29   21.66 
  -1  -5   1   -2.98   33.67 
   0   5  -1   19.58    9.81 
   0   5  -1   18.33    8.54 
   0   5  -1   18.04    1.60 
   0  -5   1   37.76   11.11 
   0  -5   1   24.25    9.38 
   0   5  -1    7.96   27.11 
   0   5  -1   37.57   36.55 
   0  -5   1  -15.96   27.19 
  -1   5  -1  567.97   37.84 
  -1   5  -1  529.65   28.11 
  -1   5  -1  540.89   39.51 
   1  -5   1  490.12   37.40 
   1  -5   1  524.61   37.17 
  -1   5  -1  485.15   66.47 
   1  -5   1  388.71   64.63 
  -2   5  -1 2339.78  154.77 
  -2   5  -1 2229.55  114.10 
  -2   5  -1 2289.10  146.56 
   2  -5   1 2188.28  138.03 
   2  -5   1 2202.71  142.59 
  -2   5  -1 2229.26  282.77 
   2  -5   1 2603.70  264.77 
  -3   5  -1 2068.49  170.92 
   3  -5   1 1856.50  136.42 
   3  -5   1 2006.78  178.69 
  -3   5  -1 1834.02  243.53 
   3  -5   1 1750.63  215.19 
  -4   5  -1  100.96   17.58 
  -4   5  -1   96.08   17.55 
   4  -5   1  110.27   17.32 
   4  -5   1   82.11   16.72 
  -4   5  -1  145.13   56.36 
   4  -5   1  157.22   60.73 
  -5   5  -1   68.07   22.46 
  -5   5  -1   76.87   17.85 
   5  -5   1   74.87   16.75 
   5  -5   1   76.40    4.24 
   5  -5   1   97.40   22.66 
  -5   5  -1  164.17   68.24 
   5  -5   1  181.54   89.08 
  -6   5  -1   61.64   24.32 
   6  -5   1   53.24   17.88 
   6  -5   1   80.74   23.49 
   6  -5   1   65.59    4.48 
  -6   5  -1  -72.57   95.39 
   6  -5   1   76.25   70.02 
  -7   5  -1   58.37   27.06 
  -7   5  -1   73.09   27.11 
   7  -5   1   81.72   26.65 
   7  -5   1  118.98   26.83 
   7  -5   1  126.00   13.20 
   7  -5   1  102.22   31.98 
  -7   5  -1  161.34  122.47 
   7  -5   1  314.67  120.17 
  -8   5  -1  499.62   45.16 
   8  -5   1  507.04   43.36 
   8  -5   1  468.08   34.18 
   8  -5   1  485.45   30.93 
   8  -5   1  404.06   65.08 
  -8   5  -1  623.42  135.53 
   8  -5   1  410.55  140.05 
  -9   5  -1  -13.31   27.95 
   9  -5   1   32.65   27.27 
   9  -5   1   19.60   21.67 
   9  -5   1   -3.99   14.92 
   9  -5   1   10.48    3.24 
   9  -5   1   12.41   80.89 
 -10   5  -1   -3.96    6.54 
  10  -5   1   45.03   30.46 
  10  -5   1   -2.73   12.90 
  12   4  -1  142.51   29.99 
 -12  -4   1  202.73   13.94 
 -12  -4   1  192.05   12.26 
  11   4  -1   32.81   20.34 
  11   4  -1   20.59    9.68 
 -11  -4   1   34.56    5.98 
 -11  -4   1   23.64    3.76 
 -11  -4   1  -20.32   45.96 
  10   4  -1  135.55   16.75 
  10   4  -1  132.73   16.49 
  10   4  -1  165.71   19.26 
 -10  -4   1  153.14   10.76 
 -10  -4   1  140.54    8.95 
 -10  -4   1  113.98   18.78 
 -10  -4   1  115.39   47.04 
 -10  -4   1   20.37   41.63 
   9   4  -1   92.83   17.55 
   9   4  -1   99.11   12.25 
  -9  -4   1   71.69   12.03 
  -9  -4   1   88.88    6.27 
  -9  -4   1   91.93    6.48 
  -9  -4   1   66.85   12.53 
  -9  -4   1    0.00   39.52 
  -9  -4   1   64.26   32.38 
   8   4  -1  217.85   21.25 
   8   4  -1  190.69   20.29 
  -8  -4   1  177.84   21.37 
  -8  -4   1  152.50   25.18 
  -8  -4   1  233.69   14.46 
  -8  -4   1  216.46   10.53 
  -8  -4   1  179.65   35.95 
  -8  -4   1  148.12   48.92 
   7   4  -1   87.81   10.98 
   7   4  -1  112.81   12.76 
  -7  -4   1  103.23    6.74 
  -7  -4   1  101.00    6.08 
  -7  -4   1   82.33   11.40 
  -7  -4   1   84.96   13.48 
  -7  -4   1   34.74   34.74 
  -7  -4   1   71.33   24.77 
   6   4  -1    4.10    7.68 
   6   4  -1   -4.78    9.77 
  -6  -4   1   -5.09    6.52 
  -6  -4   1   -5.62    7.15 
  -6  -4   1   -0.26    1.94 
  -6  -4   1    0.39    6.37 
  -6  -4   1    0.43    1.98 
  -6  -4   1    8.90   32.51 
  -6  -4   1   -9.70   20.63 
   5   4  -1   28.90    7.08 
   5   4  -1   32.10    7.17 
  -5  -4   1   36.97    2.88 
  -5  -4   1   19.45    6.52 
  -5  -4   1   33.00    3.02 
  -5  -4   1   39.20    7.52 
  -5  -4   1   23.38    6.43 
  -5  -4   1   16.50   18.86 
  -5  -4   1    1.66   23.77 
   4   4  -1  488.54   25.96 
   4   4  -1  431.35   29.48 
   4   4  -1  404.56   33.11 
  -4  -4   1  424.92   22.46 
  -4  -4   1  449.09   34.86 
  -4  -4   1  466.42   34.69 
  -4  -4   1  422.01   28.48 
  -4  -4   1  441.43   21.41 
  -4  -4   1  475.66   61.63 
  -4  -4   1  490.89   57.52 
   3   4  -1    1.48    6.05 
   3   4  -1   -4.27    4.59 
   3   4  -1    0.78    1.56 
  -3  -4   1   -4.39    6.11 
  -3  -4   1    1.18    3.71 
  -3  -4   1    1.48    7.06 
  -3  -4   1    7.94    1.74 
   3   4  -1    3.80   17.22 
  -3  -4   1   30.81   18.50 
  -3  -4   1   41.58   44.53 
   2   4  -1  122.64    7.57 
   2   4  -1  106.75   10.45 
   2   4  -1  101.68   11.79 
  -2  -4   1  124.77   13.11 
  -2  -4   1  111.03   10.61 
   2   4  -1   96.51   25.22 
  -2  -4   1  110.55   26.81 
  -2  -4   1  138.30   56.97 
   1   4  -1  154.95   15.81 
   1   4  -1  161.01   15.54 
  -1  -4   1  157.78   15.58 
  -1  -4   1  206.02   17.08 
   1   4  -1  173.07   33.34 
  -1  -4   1  110.33   32.34 
  -1  -4   1  163.15   43.64 
   0   4  -1    2.82    7.79 
   0   4  -1   -6.22    6.64 
   0   4  -1    2.84    0.87 
   0  -4   1    5.94    7.35 
   0  -4   1    2.08    8.06 
   0   4  -1   34.00   22.39 
   0   4  -1  -20.18   35.66 
   0  -4   1   -1.42   22.26 
  -1   4  -1  479.04   24.91 
  -1   4  -1  477.63   34.61 
  -1   4  -1  489.86   44.71 
   1  -4   1  462.46   39.47 
   1  -4   1  487.65   34.34 
  -1   4  -1  440.69   62.78 
   1  -4   1  474.33   69.79 
  -2   4  -1  627.85   42.43 
  -2   4  -1  607.94   43.24 
   2  -4   1  525.20   43.33 
   2  -4   1  620.23   42.88 
  -2   4  -1  620.17   85.55 
   2  -4   1  742.28   96.35 
  -3   4  -1    0.24   14.14 
  -3   4  -1   26.22   11.47 
   3  -4   1    1.52   10.18 
   3  -4   1    1.16   14.31 
  -3   4  -1   19.03   39.34 
   3  -4   1  -24.54   57.15 
  -4   4  -1  475.40   34.73 
  -4   4  -1  467.39   34.31 
   4  -4   1  378.01   32.87 
   4  -4   1  415.24   20.91 
   4  -4   1  406.28   32.92 
  -4   4  -1  535.43   78.50 
   4  -4   1  393.92   78.22 
  -5   4  -1  868.45   60.92 
  -5   4  -1  916.57   61.59 
   5  -4   1  842.90   61.44 
   5  -4   1  919.32   60.05 
   5  -4   1  883.43   47.13 
  -5   4  -1  970.76  118.69 
   5  -4   1  706.69  113.27 
  -6   4  -1   50.78   17.53 
  -6   4  -1   39.01   21.57 
   6  -4   1   64.21    4.46 
   6  -4   1   91.85   17.72 
   6  -4   1   84.29   25.64 
  -6   4  -1   10.30   82.03 
   6  -4   1  -10.60   82.23 
  -7   4  -1  170.80   29.61 
  -7   4  -1  147.37   28.01 
   7  -4   1  124.79   24.79 
   7  -4   1  130.51   15.89 
   7  -4   1  146.55   10.24 
   7  -4   1  149.58   26.57 
  -7   4  -1  116.30   98.81 
   7  -4   1   73.15   95.70 
  -8   4  -1  907.96   93.65 
  -8   4  -1  931.59   79.17 
   8  -4   1 1189.09   66.49 
   8  -4   1 1048.90   64.23 
   8  -4   1 1033.69  107.03 
   8  -4   1 1082.87   75.93 
  -8   4  -1  734.63  169.35 
   8  -4   1  765.83  132.75 
  -9   4  -1  269.65   34.47 
   9  -4   1  330.07   27.19 
   9  -4   1  275.28   19.69 
   9  -4   1  276.63   32.75 
   9  -4   1  331.61   40.86 
  -9   4  -1  172.96   94.94 
   9  -4   1  177.81  123.51 
 -10   4  -1    0.51   19.75 
  10  -4   1    9.97   17.32 
  10  -4   1    6.59   19.45 
  11  -4   1   40.10   29.74 
  11  -4   1   22.96   15.77 
  12   3  -1   90.18   19.70 
 -12  -3   1   72.00    6.04 
 -12  -3   1   52.31    8.13 
  11   3  -1  232.01   31.39 
  11   3  -1  188.86   32.20 
 -11  -3   1  248.61   16.81 
 -11  -3   1  231.28   14.92 
  10   3  -1  156.19   22.39 
  10   3  -1  172.91   18.24 
 -10  -3   1  180.11   11.48 
 -10  -3   1  112.61   18.81 
 -10  -3   1  160.97    8.84 
 -10  -3   1  105.88   19.19 
 -10  -3   1  151.30   56.68 
   9   3  -1   11.07   10.38 
   9   3  -1   32.06    4.66 
   9   3  -1   45.10    9.29 
  -9  -3   1   31.94    5.03 
  -9  -3   1   23.80    3.96 
  -9  -3   1   17.30   10.49 
  -9  -3   1   21.78   11.27 
  -9  -3   1   46.96   43.45 
   8   3  -1  764.96   72.10 
   8   3  -1  850.04   43.16 
   8   3  -1  895.30   78.93 
  -8  -3   1  878.62   60.73 
  -8  -3   1  821.75   75.91 
  -8  -3   1  880.30   43.37 
  -8  -3   1  850.90   79.93 
  -8  -3   1  730.37  104.46 
   7   3  -1   94.34   14.05 
   7   3  -1   66.89   10.32 
   7   3  -1   84.72    5.16 
  -7  -3   1   85.23    5.32 
  -7  -3   1   96.52   12.03 
  -7  -3   1   79.72    6.46 
  -7  -3   1   64.79   12.23 
  -7  -3   1   -8.32   37.43 
   6   3  -1  185.13    9.05 
   6   3  -1  195.79   16.91 
   6   3  -1  160.45   15.09 
  -6  -3   1  164.58   11.71 
  -6  -3   1  176.56    8.77 
  -6  -3   1  167.60   17.39 
  -6  -3   1  192.07   16.08 
  -6  -3   1  138.36   40.75 
   5   3  -1  296.62   15.22 
   5   3  -1  289.08   22.19 
   5   3  -1  322.90   22.53 
  -5  -3   1  296.28   21.25 
  -5  -3   1  295.43   14.79 
  -5  -3   1  297.69   26.52 
  -5  -3   1  316.94   24.02 
  -5  -3   1  316.25   20.61 
  -5  -3   1  300.26   45.94 
   4   3  -1  712.00   35.15 
   4   3  -1  703.95   50.96 
   4   3  -1  776.28   49.10 
  -4  -3   1  779.99   40.70 
  -4  -3   1  715.35   52.40 
  -4  -3   1  752.00   55.12 
  -4  -3   1  737.68   46.36 
  -4  -3   1  727.59   34.61 
  -4  -3   1  695.91   81.49 
  -4  -3   1  695.72   74.36 
   3   3  -1   71.94    7.73 
   3   3  -1   65.53    4.94 
   3   3  -1   68.53    7.49 
  -3  -3   1   86.05    7.92 
  -3  -3   1   84.63    8.34 
  -3  -3   1   65.09    7.15 
  -3  -3   1   67.47    4.48 
  -3  -3   1   80.52    9.01 
  -3  -3   1   79.02   16.51 
   2   3  -1  309.99   21.79 
   2   3  -1  307.18   18.23 
   2   3  -1  290.18   23.50 
  -2  -3   1  313.47   21.06 
  -2  -3   1  302.95   21.87 
  -2  -3   1  295.53   21.62 
  -2  -3   1  295.29   15.46 
   2   3  -1  304.42   36.29 
  -2  -3   1  359.23   64.98 
  -2  -3   1  282.69   36.71 
   1   3  -1 2997.27  197.33 
   1   3  -1 3014.82  195.56 
  -1  -3   1 3160.69  210.68 
  -1  -3   1 3067.07  202.49 
   1   3  -1 3420.06  375.39 
   1   3  -1 3066.43  343.66 
  -1  -3   1 3388.92  378.27 
  -1  -3   1 2912.40  318.88 
   0   3  -1  894.56   68.55 
   0   3  -1  855.77   60.24 
   0   3  -1  837.65   48.91 
   0  -3   1  874.05   54.74 
   0  -3   1  860.74   57.73 
   0   3  -1  723.73   88.99 
   0  -3   1  947.06   92.62 
  -1   3  -1 1962.37  134.32 
  -1   3  -1 2026.27  135.11 
   1  -3   1 1990.95  124.53 
   1  -3   1 2049.45  131.43 
  -1   3  -1 2191.76  237.34 
   1  -3   1 1918.93  216.77 
  -2   3  -1   68.84   11.62 
   2  -3   1   57.37   10.64 
   2  -3   1   62.68   11.04 
  -2   3  -1   58.20   30.81 
   2  -3   1   41.82   32.55 
  -3   3  -1    8.81   13.38 
  -3   3  -1   19.62   14.54 
   3  -3   1    3.88   13.20 
   3  -3   1   24.99   13.54 
  -3   3  -1  -17.88   44.25 
   3  -3   1   14.14   50.56 
  -4   3  -1  981.49   71.24 
  -4   3  -1  928.00   63.80 
   4  -3   1  845.67   45.49 
   4  -3   1  941.22   66.49 
   4  -3   1  852.63   58.60 
  -4   3  -1 1015.69  131.70 
   4  -3   1 1056.24  127.23 
  -5   3  -1   23.48   17.22 
  -5   3  -1   14.14   12.34 
   5  -3   1   11.90   15.97 
   5  -3   1   14.93   10.86 
  -5   3  -1    5.08   44.55 
   5  -3   1    1.73   60.17 
  -6   3  -1  376.28   34.75 
  -6   3  -1  360.31   32.28 
   6  -3   1  368.75   31.19 
   6  -3   1  362.80   32.81 
   6  -3   1  339.89   20.92 
  -6   3  -1  353.97   92.22 
   6  -3   1  479.46   83.08 
  -7   3  -1   -2.72   20.56 
  -7   3  -1  -40.80   19.32 
   7  -3   1   27.28   18.74 
   7  -3   1   10.25   18.80 
   7  -3   1   33.58   10.69 
  -7   3  -1  -71.40   84.28 
   7  -3   1  121.48   82.83 
  -8   3  -1   13.43   16.34 
  -8   3  -1   26.00   23.88 
   8  -3   1   60.98   21.85 
   8  -3   1   17.50    3.08 
   8  -3   1   15.65   12.27 
   8  -3   1    2.43   13.72 
  -8   3  -1   25.33   73.07 
   8  -3   1   46.67   91.01 
  -9   3  -1   42.27   23.00 
  -9   3  -1   18.06   18.33 
   9  -3   1    3.99   14.82 
   9  -3   1   34.51   11.02 
   9  -3   1   23.02   14.89 
   9  -3   1   19.81    3.63 
  -9   3  -1   78.00   94.47 
   9  -3   1  -28.10   73.94 
 -10   3  -1   21.12   28.71 
  10  -3   1    5.32    3.87 
  10  -3   1   -5.66   23.38 
  10  -3   1   -5.18   15.95 
  10  -3   1   69.00  115.85 
  11  -3   1   24.24   19.80 
  11  -3   1   85.35   29.89 
  12   2  -1   28.45   17.18 
  12   2  -1    8.84   13.78 
 -12  -2   1    6.88    4.51 
 -12  -2   1    5.32    4.99 
  11   2  -1  114.73   17.41 
  11   2  -1   96.94   18.53 
 -11  -2   1  130.83    9.61 
 -11  -2   1  107.27    7.68 
  10   2  -1   11.19   16.39 
  10   2  -1   31.47   12.00 
  10   2  -1   26.62   12.04 
 -10  -2   1   30.60    3.47 
 -10  -2   1   31.37   16.00 
 -10  -2   1   30.52   16.42 
 -10  -2   1   28.92    5.53 
  10   2  -1   47.19   40.09 
 -10  -2   1  -90.51   60.30 
 -10  -2   1  180.10  173.97 
   9   2  -1    1.37    3.65 
   9   2  -1  -10.88   13.60 
   9   2  -1    3.53    9.85 
   9   2  -1    3.81   10.71 
  -9  -2   1    7.21   13.22 
  -9  -2   1    3.75    4.15 
  -9  -2   1   14.11   12.29 
  -9  -2   1    1.19    3.13 
   9   2  -1  -21.13   36.86 
  -9  -2   1  -25.62   51.02 
   8   2  -1   14.67    8.81 
   8   2  -1   51.10   10.84 
   8   2  -1   22.02    3.78 
   8   2  -1   35.93   10.60 
  -8  -2   1   37.05   12.14 
  -8  -2   1   14.01    3.34 
  -8  -2   1   14.72   11.82 
  -8  -2   1   25.35    4.34 
   8   2  -1    5.36   34.99 
  -8  -2   1   40.61   42.76 
   7   2  -1 1126.97   81.30 
   7   2  -1  999.92   66.06 
   7   2  -1  971.56   51.04 
   7   2  -1  981.89   92.53 
  -7  -2   1 1041.37  105.40 
  -7  -2   1 1077.85   55.60 
  -7  -2   1  992.49   47.39 
  -7  -2   1  985.22   71.29 
   7   2  -1  797.50   91.36 
  -7  -2   1  703.09  112.63 
   6   2  -1  144.22   12.48 
   6   2  -1  129.01    7.21 
   6   2  -1  111.23   11.24 
   6   2  -1  134.85   14.37 
  -6  -2   1  115.86    6.28 
  -6  -2   1  122.76   13.30 
  -6  -2   1  124.82    7.23 
  -6  -2   1  121.81   13.36 
   6   2  -1   76.77   27.15 
  -6  -2   1  172.85   41.72 
   5   2  -1 1509.40   95.66 
   5   2  -1 1350.85   69.84 
   5   2  -1 1390.13   94.47 
  -5  -2   1 1426.59   66.67 
  -5  -2   1 1486.30  111.31 
  -5  -2   1 1348.26   95.03 
  -5  -2   1 1393.21   77.71 
   5   2  -1  738.84   79.83 
   4   2  -1 1094.03   53.62 
   4   2  -1 1113.01   74.84 
   4   2  -1 1179.92   79.62 
  -4  -2   1 1165.07   81.75 
  -4  -2   1 1222.10   63.06 
  -4  -2   1 1180.21   79.11 
  -4  -2   1 1114.21   54.28 
  -4  -2   1 1178.35   75.58 
   3   2  -1    7.03    1.83 
   3   2  -1   12.93    6.31 
   3   2  -1    8.35    4.57 
  -3  -2   1   -0.19    4.07 
  -3  -2   1    8.90    4.44 
  -3  -2   1    2.30    1.21 
  -3  -2   1   -1.20    4.44 
  -3  -2   1    1.25    1.31 
  -3  -2   1  -31.43   14.26 
   2   2  -1  459.28   29.80 
   2   2  -1  471.00   29.43 
   2   2  -1  435.16   31.64 
  -2  -2   1  424.01   25.25 
  -2  -2   1  449.50   31.88 
  -2  -2   1  440.99   37.84 
  -2  -2   1  462.23   35.38 
  -2  -2   1  462.75   23.00 
  -2  -2   1  453.29   47.93 
   1   2  -1 1731.10  107.66 
   1   2  -1 1691.28  102.70 
   1   2  -1 1655.75  114.79 
  -1  -2   1 1629.14  108.42 
  -1  -2   1 1713.96  112.64 
   1   2  -1 1757.49  181.21 
   1   2  -1 1875.56  207.62 
  -1  -2   1 1687.76  185.05 
  -1  -2   1 1729.94  208.19 
   0   2  -1  332.35   21.44 
   0   2  -1  297.71   21.85 
   0  -2   1  304.49   19.68 
   0  -2   1  269.95   20.88 
   0   2  -1  276.38   34.26 
   0  -2   1  271.82   34.62 
  -1   2  -1   45.94    7.97 
   1  -2   1   46.15    9.74 
   1  -2   1   45.23    7.57 
  -1   2  -1   38.36   20.29 
   1  -2   1   23.83   28.49 
  -2   2  -1   -1.22    7.59 
  -2   2  -1    6.37    7.37 
   2  -2   1   15.52    7.39 
   2  -2   1    8.35    7.17 
  -2   2  -1   29.20   27.18 
   2  -2   1  -10.75   23.46 
  -3   2  -1   57.20   11.59 
  -3   2  -1   79.78   12.28 
   3  -2   1   84.62   11.95 
   3  -2   1   76.40   11.18 
   3  -2   1   87.38    4.20 
  -3   2  -1   52.77   34.02 
   3  -2   1  169.01   37.75 
  -4   2  -1 2258.50  144.53 
  -4   2  -1 1899.49  158.37 
   4  -2   1 2149.14  101.12 
   4  -2   1 2131.58  140.21 
   4  -2   1 2231.67  144.29 
  -4   2  -1 2502.35  269.20 
   4  -2   1 2474.44  269.38 
  -5   2  -1 2051.42  138.78 
  -5   2  -1 2227.03  130.03 
   5  -2   1 2015.93   95.31 
   5  -2   1 1952.83  130.62 
   5  -2   1 1964.10  128.07 
  -5   2  -1 1749.18  219.64 
   5  -2   1 2188.72  217.60 
  -6   2  -1  202.58   23.68 
  -6   2  -1  169.72   23.78 
   6  -2   1  115.98   21.66 
   6  -2   1  162.35    9.94 
   6  -2   1  210.84   19.86 
  -6   2  -1  216.42   60.72 
   6  -2   1  207.33   71.73 
  -7   2  -1  -10.18   17.81 
  -7   2  -1   -7.16   18.78 
   7  -2   1    7.67   15.23 
   7  -2   1   -2.40    9.48 
   7  -2   1   -8.48   16.25 
   7  -2   1    8.49    1.93 
  -7   2  -1   52.28   73.83 
   7  -2   1   -6.36   65.15 
  -8   2  -1   30.52   21.96 
  -8   2  -1   34.41   15.96 
   8  -2   1   43.45   17.49 
   8  -2   1   30.98    9.32 
   8  -2   1   43.56   14.43 
   8  -2   1   28.50    3.55 
  -8   2  -1  -43.97   59.44 
   8  -2   1   59.95   83.65 
  -9   2  -1    8.97   17.59 
  -9   2  -1   34.84   23.64 
   9  -2   1  -16.87   18.20 
   9  -2   1    0.45   12.85 
   9  -2   1   -6.91   12.98 
   9  -2   1    4.13    3.30 
  -9   2  -1   -5.58  115.45 
   9  -2   1  -70.23   64.67 
 -10   2  -1   -0.53   26.06 
  10  -2   1  -18.30   15.22 
  10  -2   1    6.00   20.74 
  10  -2   1   -1.67    2.60 
 -10   2  -1  -58.38   85.88 
  10  -2   1   94.06  105.25 
 -11   2  -1   48.96    6.16 
  11  -2   1   37.72   18.33 
  11  -2   1   52.44   20.00 
  12   1  -1    8.15   20.33 
  12   1  -1  -11.87   16.57 
 -12  -1   1    3.44    6.17 
  11   1  -1   29.34   14.74 
  11   1  -1   17.73   13.94 
 -11  -1   1  -17.21   25.24 
 -11  -1   1   21.77    5.97 
 -11  -1   1   17.14    3.32 
  10   1  -1   41.54   13.52 
  10   1  -1   25.04   14.21 
  10   1  -1   20.48   14.97 
  10   1  -1   21.76    4.55 
 -10  -1   1   24.22    3.20 
 -10  -1   1   39.33   18.39 
 -10  -1   1   22.44    5.20 
  10   1  -1  -38.36   53.32 
 -10  -1   1 -208.01  155.59 
 -10  -1   1   22.10   52.17 
   9   1  -1   19.75   10.70 
   9   1  -1   14.48   33.76 
   9   1  -1   15.87   12.51 
   9   1  -1   19.86    3.87 
  -9  -1   1   31.31   15.10 
  -9  -1   1   11.56    4.32 
  -9  -1   1   19.34   14.43 
  -9  -1   1   11.48    2.44 
   9   1  -1   55.68   48.95 
  -9  -1   1  -41.96   59.42 
   8   1  -1  350.63   29.03 
   8   1  -1  436.83   29.71 
   8   1  -1  353.02   28.37 
   8   1  -1  362.30   18.64 
  -8  -1   1  339.40   16.94 
  -8  -1   1  336.06   32.37 
  -8  -1   1  350.92   19.42 
  -8  -1   1  324.11   35.48 
   8   1  -1  423.35   61.90 
  -8  -1   1  119.63   59.10 
   7   1  -1    9.42    2.99 
   7   1  -1   25.81   12.96 
   7   1  -1    0.21    8.72 
   7   1  -1   19.31    9.90 
  -7  -1   1   -1.34   11.30 
  -7  -1   1   -3.47   10.85 
  -7  -1   1    8.38    1.94 
   7   1  -1  -77.48   36.75 
  -7  -1   1  -13.91   42.06 
   6   1  -1  285.57   21.18 
   6   1  -1  296.90   21.88 
   6   1  -1  305.07   21.65 
   6   1  -1  282.95   14.24 
  -6  -1   1  312.68   22.95 
  -6  -1   1  272.54   22.75 
  -6  -1   1  269.12   13.52 
   6   1  -1  295.25   49.48 
  -6  -1   1  277.26   54.69 
   5   1  -1 1090.13   51.01 
   5   1  -1 1053.58   74.14 
   5   1  -1  963.86   73.77 
   5   1  -1 1058.42   72.26 
  -5  -1   1 1073.02   48.89 
  -5  -1   1 1121.09   82.38 
  -5  -1   1  984.14   89.44 
   5   1  -1 1077.59  121.66 
  -5  -1   1  921.88  133.31 
   4   1  -1 1051.45   80.79 
   4   1  -1 1082.60   53.73 
   4   1  -1  978.00   65.62 
   4   1  -1  982.63   66.61 
  -4  -1   1 1076.98   71.08 
  -4  -1   1  977.51   65.08 
  -4  -1   1 1003.05   48.42 
  -4  -1   1 1016.15   68.54 
   4   1  -1 1055.33  109.37 
  -4  -1   1  973.74  120.66 
   3   1  -1   11.10    1.78 
   3   1  -1   19.42    5.38 
   3   1  -1   16.28    4.71 
  -3  -1   1   14.78    5.68 
  -3  -1   1   10.22    3.25 
  -3  -1   1    6.61    1.53 
  -3  -1   1   13.90    5.26 
   3   1  -1   -5.84   11.65 
  -3  -1   1   29.81   18.97 
   2   1  -1   16.75    5.62 
   2   1  -1   16.57    1.61 
   2   1  -1   22.29    3.25 
  -2  -1   1   14.60    3.23 
  -2  -1   1   16.75    2.93 
  -2  -1   1   17.88    3.20 
  -2  -1   1   15.83    1.59 
   2   1  -1  -15.62    6.15 
  -2  -1   1    2.62    7.71 
  -1  -1   1  674.69   39.04 
  -1  -1   1  678.31   45.33 
  -1  -1   1  651.95   48.69 
  -1  -1   1  660.81   45.99 
   1   1  -1  423.00   48.51 
   1   1  -1  455.79   56.56 
   0   1  -1 1701.66  120.88 
   0   1  -1 1556.93  166.57 
  -1   1  -1 1922.08  126.41 
  -1   1  -1 1571.92  116.91 
   1  -1   1 1922.24  128.21 
   1  -1   1 1608.03  115.33 
  -1   1  -1 1948.47  210.55 
   1  -1   1 1988.29  206.87 
  -2   1  -1 1066.46   83.56 
  -2   1  -1 1017.85   66.63 
   2  -1   1 1014.92   68.15 
   2  -1   1  908.00   52.05 
   2  -1   1 1048.34   70.70 
  -2   1  -1 1009.59  119.12 
   2  -1   1 1155.89  118.87 
  -3   1  -1 1176.61   84.73 
  -3   1  -1 1177.59   95.15 
   3  -1   1 1136.25   99.23 
   3  -1   1 1255.19   78.39 
   3  -1   1 1212.17   60.14 
  -3   1  -1 1354.40  145.11 
   3  -1   1 1007.97  144.71 
  -4   1  -1  451.00   36.31 
  -4   1  -1  442.45   39.55 
   4  -1   1  441.39   32.08 
   4  -1   1  469.42   21.89 
   4  -1   1  423.50   45.91 
  -4   1  -1  521.23   73.32 
   4  -1   1  341.03   63.43 
  -5   1  -1  130.21   18.86 
  -5   1  -1  144.12   19.76 
   5  -1   1  133.38    7.01 
   5  -1   1  155.54   20.46 
  -5   1  -1  171.55   63.46 
   5  -1   1  178.38   51.39 
  -6   1  -1  892.86   63.38 
  -6   1  -1  919.82   93.53 
   6  -1   1  923.39   44.81 
   6  -1   1 1101.32   72.98 
   6  -1   1  927.95   81.98 
   6  -1   1  991.24   64.96 
  -6   1  -1  787.49  119.86 
   6  -1   1  855.47  117.15 
  -7   1  -1  328.12   27.67 
  -7   1  -1  288.07   33.53 
   7  -1   1  277.95   22.02 
   7  -1   1  325.30   30.99 
   7  -1   1  263.13   13.84 
   7  -1   1  258.15   27.90 
  -7   1  -1  369.33   75.23 
   7  -1   1  267.03   77.98 
  -8   1  -1  236.27   30.20 
  -8   1  -1  248.82   36.07 
   8  -1   1  309.18   22.26 
   8  -1   1  291.88   15.81 
   8  -1   1  294.55   27.98 
   8  -1   1  207.93   29.72 
  -8   1  -1  109.06   83.01 
   8  -1   1  158.45   78.78 
  -9   1  -1  841.99   94.25 
  -9   1  -1  813.98   91.24 
   9  -1   1  889.79   55.01 
   9  -1   1  993.18   94.79 
   9  -1   1  803.22   84.13 
   9  -1   1 1004.87   65.82 
  -9   1  -1  502.34  118.68 
   9  -1   1  572.30  121.42 
 -10   1  -1  170.78   35.72 
 -10   1  -1  262.39   16.12 
 -10   1  -1  232.08   41.39 
  10  -1   1  225.53   24.06 
  10  -1   1  202.45   15.05 
  10  -1   1  321.13   35.40 
  10  -1   1  218.60   29.18 
 -10   1  -1  184.53  123.26 
  10  -1   1  232.02  108.23 
 -11   1  -1   26.66    5.03 
  11  -1   1   21.70   18.57 
  11  -1   1   16.71    5.12 
  11  -1   1   36.68   28.88 
  12  -1   1   93.50   25.11 
  11   0  -1   31.56   16.90 
  11   0  -1   15.87   14.23 
 -11   0   1   18.15    5.70 
  10   0  -1    9.02   15.40 
  10   0  -1    7.27    3.95 
  10   0  -1   -6.80   11.57 
 -10   0   1    5.30    2.62 
 -10   0   1    4.53   19.03 
 -10   0   1    3.13    3.38 
  10   0  -1  -68.94   70.93 
 -10   0   1   79.23  150.69 
   9   0  -1   32.03   14.30 
   9   0  -1   21.99    3.88 
   9   0  -1   54.72   15.15 
   9   0  -1   27.66   16.89 
  -9   0   1    4.99   17.59 
  -9   0   1   20.97   16.25 
  -9   0   1   24.96    3.39 
   9   0  -1   13.39   61.32 
  -9   0   1  -37.43   74.92 
   8   0  -1  207.18   18.59 
   8   0  -1  218.90   21.28 
   8   0  -1  192.75   10.25 
   8   0  -1  194.51   19.94 
  -8   0   1  180.32    9.13 
  -8   0   1  159.15   22.02 
  -8   0   1  168.31   22.44 
   8   0  -1  182.82   63.49 
  -8   0   1   82.05   61.64 
   7   0  -1 1461.59  100.93 
   7   0  -1 1629.00   76.61 
   7   0  -1 1691.88  125.56 
   7   0  -1 1534.60  114.29 
  -7   0   1 1438.59  115.61 
  -7   0   1 1514.65   73.34 
  -7   0   1 1495.69  117.65 
   7   0  -1 1510.67  162.54 
  -7   0   1 1037.84  156.21 
   6   0  -1  930.55   59.62 
   6   0  -1  838.55   68.05 
   6   0  -1  937.64   68.57 
   6   0  -1  935.41   45.75 
  -6   0   1  988.82   81.80 
  -6   0   1  892.33   61.09 
  -6   0   1  907.48   40.42 
   6   0  -1  822.54  102.29 
  -6   0   1  802.00  101.66 
   5   0  -1 1197.56   70.37 
   5   0  -1 1101.43   82.99 
   5   0  -1 1126.41   56.65 
   5   0  -1 1049.83   76.82 
  -5   0   1 1091.65   80.09 
  -5   0   1 1057.19   51.01 
  -5   0   1 1066.89   68.67 
   5   0  -1 1033.32  120.03 
  -5   0   1 1036.08  118.43 
   4   0  -1  429.42   23.51 
   4   0  -1  462.69   29.90 
   4   0  -1  486.83   31.62 
   4   0  -1  458.98   32.94 
  -4   0   1  477.31   32.48 
  -4   0   1  417.89   21.68 
  -4   0   1  460.34   30.36 
   4   0  -1  429.95   56.59 
  -4   0   1  462.53   59.24 
   3   0  -1  454.04   23.79 
   3   0  -1  503.70   37.70 
   3   0  -1  440.06   32.22 
   3   0  -1  535.28   33.79 
  -3   0   1  441.50   25.22 
  -3   0   1  457.42   32.51 
  -3   0   1  447.97   32.57 
   3   0  -1  456.81   56.34 
  -3   0   1  438.71   53.65 
   2   0  -1  296.89   15.09 
   2   0  -1  278.17   19.00 
   2   0  -1  272.53   20.83 
   2   0  -1  303.90   19.58 
  -2   0   1  283.84   20.32 
  -2   0   1  315.61   18.47 
  -2   0   1  283.56   19.37 
  -2   0   1  282.62   14.56 
   2   0  -1  242.29   31.40 
  -2   0   1  264.46   31.98 
   1   0  -1  646.67   51.17 
  -1   0   1  758.57   54.17 
  -1   0   1  772.39   51.55 
  -1   0   1  845.14   51.65 
  -1   0   1  809.72   45.06 
  -1   0   1  819.58   97.34 
  -1   0   1  961.57  107.94 
   0   0  -1   -3.64    0.17 
   0   0   1   -5.37    1.53 
   0   0  -1   -3.21    3.60 
   0   0   1  -11.24    4.98 
  -1   0  -1  163.62   11.16 
  -2   0  -1  161.60   13.46 
  -2   0  -1  166.64   12.59 
  -2   0  -1  161.10    7.99 
   2   0   1  157.88    7.88 
   2   0   1  153.10   13.59 
   2   0   1  166.03   13.12 
  -2   0  -1  158.63   24.41 
   2   0   1  140.31   26.29 
  -3   0  -1   34.95   10.11 
  -3   0  -1   57.02   10.30 
  -3   0  -1   45.56    2.60 
   3   0   1   39.66    9.44 
   3   0   1   42.66    2.41 
   3   0   1   35.29    9.94 
  -3   0  -1   25.03   27.26 
   3   0   1   60.40   27.16 
  -4   0  -1   18.24    2.24 
  -4   0  -1    0.24    6.85 
  -4   0  -1    7.97    7.72 
   4   0   1   11.95    7.72 
   4   0   1   12.46    1.93 
   4   0   1    9.52    6.85 
  -4   0  -1   40.83   28.08 
   4   0   1   -8.79   21.71 
  -5   0  -1    7.05    2.15 
  -5   0  -1   -5.97   12.64 
  -5   0  -1   22.39   12.31 
   5   0   1    0.75    7.12 
   5   0   1    5.50    1.60 
   5   0   1   11.53   11.71 
   5   0   1   -0.64    4.72 
  -5   0  -1  -23.76   48.75 
   5   0   1   26.10   38.91 
  -6   0  -1  127.26   16.66 
  -6   0  -1  130.98    7.37 
  -6   0  -1  139.71   18.96 
   6   0   1  129.03    6.72 
   6   0   1  147.46   18.45 
   6   0   1  142.69   17.46 
   6   0   1  146.54   12.25 
  -6   0  -1   52.12   63.72 
   6   0   1   71.00   49.31 
  -7   0  -1    1.61    2.18 
  -7   0  -1   -3.47   14.54 
  -7   0  -1   -2.44   11.22 
   7   0   1    3.24    9.07 
   7   0   1    4.44    2.60 
   7   0   1   -7.10    8.94 
   7   0   1   -5.80    8.14 
  -7   0  -1  -32.84   48.60 
   7   0   1   -9.64   39.45 
  -8   0  -1   42.80   14.35 
  -8   0  -1   15.27    2.51 
  -8   0  -1   20.70   17.08 
   8   0   1   13.88   14.03 
   8   0   1   28.78    3.47 
   8   0   1   20.01    8.37 
   8   0   1   18.22   10.65 
  -8   0  -1   78.73   78.98 
   8   0   1    3.20   42.14 
  -9   0  -1   11.98    3.74 
  -9   0  -1    5.43   18.54 
  -9   0  -1   17.19   20.72 
   9   0   1   18.12    3.90 
   9   0   1   33.08   16.90 
   9   0   1   15.21   13.05 
   9   0   1    0.00   14.41 
  -9   0  -1 -135.60   82.90 
   9   0   1   55.90   72.40 
 -10   0  -1  236.47   33.51 
 -10   0  -1  280.90   33.24 
 -10   0  -1  293.63   19.62 
  10   0   1  257.65   31.67 
  10   0   1  252.75   22.96 
  10   0   1  280.61   27.55 
  10   0   1  267.56   29.09 
 -10   0  -1  153.77  102.45 
  10   0   1  132.92   87.70 
 -11   0  -1   26.34    5.17 
  11   0   1   27.10   13.56 
  11   0   1   21.77    4.06 
  11   0   1   39.90   14.74 
 -12   0  -1   11.17    5.42 
  12   0   1   11.48   21.75 
  12   0   1   27.08   22.93 
  11  -1  -1   37.17   20.74 
  11  -1  -1   -4.01   19.79 
 -11   1   1    7.46    4.30 
  10  -1  -1    7.67   17.23 
  10  -1  -1    5.67    3.82 
  10  -1  -1   15.02   17.45 
 -10   1   1   15.68   22.96 
  10  -1  -1  -14.30   88.69 
   9  -1  -1  176.76   19.35 
   9  -1  -1  171.97   12.21 
   9  -1  -1  234.50   26.34 
   9  -1  -1  162.74   19.19 
  -9   1   1  214.40   25.67 
  -9   1   1  145.08   22.09 
   9  -1  -1  196.22   63.17 
  -9   1   1  257.76   90.71 
   8  -1  -1    1.15    2.72 
   8  -1  -1   18.34   13.30 
   8  -1  -1   -7.19    8.43 
   8  -1  -1    2.27   13.45 
  -8   1   1   20.56   16.27 
  -8   1   1   -0.28   17.01 
  -8   1   1    1.55    1.79 
   8  -1  -1   40.02   61.03 
  -8   1   1   -1.69   46.05 
   7  -1  -1   34.17   13.89 
   7  -1  -1   29.49    3.23 
   7  -1  -1   51.81   13.98 
   7  -1  -1   15.16    8.51 
  -7   1   1   10.99   14.98 
  -7   1   1   36.86    3.02 
  -7   1   1   10.13   15.68 
   7  -1  -1   83.76   56.98 
  -7   1   1  -61.44   55.65 
   6  -1  -1  327.75   27.55 
   6  -1  -1  319.76   26.87 
   6  -1  -1  328.26   19.22 
   6  -1  -1  381.91   26.24 
  -6   1   1  348.73   30.64 
  -6   1   1  334.47   28.84 
  -6   1   1  321.43   16.14 
   6  -1  -1  413.60   67.34 
  -6   1   1  299.37   66.46 
   5  -1  -1   81.73   14.09 
   5  -1  -1  107.44   10.43 
   5  -1  -1  101.90    5.56 
   5  -1  -1   73.28   11.50 
  -5   1   1   96.07   12.54 
  -5   1   1  106.57    5.23 
  -5   1   1   82.80   14.84 
   5  -1  -1  127.67   44.87 
  -5   1   1  114.45   46.25 
   4  -1  -1 1146.52   79.59 
   4  -1  -1 1176.53   58.64 
   4  -1  -1 1205.43   75.33 
   4  -1  -1 1212.97   77.11 
  -4   1   1 1092.43   58.42 
  -4   1   1 1173.71   86.48 
  -4   1   1 1177.09   76.46 
   4  -1  -1 1154.82  128.05 
  -4   1   1 1044.52  132.09 
   3  -1  -1  576.69   40.27 
   3  -1  -1  567.40   28.54 
   3  -1  -1  611.51   43.80 
   3  -1  -1  583.92   39.14 
  -3   1   1  591.23   31.50 
  -3   1   1  584.83   42.60 
  -3   1   1  521.70   39.82 
   3  -1  -1  546.12   70.83 
  -3   1   1  605.57   75.49 
   2  -1  -1  525.93   40.36 
   2  -1  -1  511.33   26.92 
   2  -1  -1  509.68   37.11 
   2  -1  -1  517.95   34.84 
  -2   1   1  517.58   25.70 
  -2   1   1  572.61   37.58 
  -2   1   1  494.39   37.06 
   2  -1  -1  426.97   56.46 
  -2   1   1  498.22   58.30 
   1  -1  -1 3718.91  234.41 
   1  -1  -1 3827.37  295.10 
   1  -1  -1 3740.44  260.21 
   1  -1  -1 3050.00  182.61 
  -1   1   1 4149.38  252.88 
  -1   1   1 3737.25  260.79 
  -1   1   1 4110.03  228.06 
  -1   1   1 3533.65  177.64 
  -1   1   1 4025.53  257.04 
   1  -1  -1 3879.81  404.92 
  -1   1   1 3737.08  406.23 
  -1   1   1 4381.95  461.64 
   0  -1  -1 1619.01  141.87 
   0  -1  -1 1936.16  128.38 
   0   1   1 1540.38  120.49 
  -1  -1  -1 2712.83  192.97 
   1   1   1 2889.41  185.64 
  -1  -1  -1 5879.88  604.83 
  -2  -1  -1  169.03    8.40 
  -2  -1  -1  168.07   14.33 
  -2  -1  -1  158.36   16.27 
  -2  -1  -1  170.56   10.57 
   2   1   1  171.67   10.07 
   2   1   1  178.76    8.88 
   2   1   1  165.78   14.03 
   2   1   1  192.99   14.79 
  -2  -1  -1  224.53   31.22 
   2   1   1  187.87   28.32 
  -3  -1  -1   16.28    1.67 
  -3  -1  -1   18.37    7.88 
  -3  -1  -1   21.65    6.21 
  -3  -1  -1   19.97    1.53 
   3   1   1    6.98    8.10 
   3   1   1   21.05    1.87 
   3   1   1   24.08    6.22 
  -3  -1  -1    1.42   22.73 
   3   1   1   -0.10   14.86 
  -4  -1  -1  738.37   54.74 
  -4  -1  -1  821.83   38.77 
  -4  -1  -1  816.93   73.21 
  -4  -1  -1  767.44   48.44 
   4   1   1  923.40   53.28 
   4   1   1  765.05   40.02 
   4   1   1  778.99   59.68 
   4   1   1  755.55   63.00 
  -4  -1  -1  821.47  105.19 
   4   1   1  816.11   95.68 
  -5  -1  -1  163.71    8.06 
  -5  -1  -1  143.40   16.98 
  -5  -1  -1  146.99   17.58 
  -5  -1  -1  162.26    9.08 
   5   1   1  134.10   16.64 
   5   1   1  174.14   13.22 
   5   1   1  130.22   15.94 
   5   1   1  166.40    8.32 
  -5  -1  -1  145.27   45.37 
   5   1   1  118.42   39.60 
  -6  -1  -1   20.10    2.64 
  -6  -1  -1   11.69   12.73 
  -6  -1  -1   12.44   12.81 
  -6  -1  -1   19.09    2.60 
   6   1   1   14.48    8.15 
   6   1   1   15.43    2.17 
   6   1   1   38.13   12.70 
   6   1   1   10.06   11.20 
  -6  -1  -1   42.57   54.10 
   6   1   1   25.14   41.39 
  -7  -1  -1  641.91   31.88 
  -7  -1  -1  604.23   58.42 
  -7  -1  -1  590.52   49.47 
  -7  -1  -1  646.06   34.74 
   7   1   1  679.60   47.05 
   7   1   1  697.49   59.19 
   7   1   1  632.29   31.62 
   7   1   1  637.35   46.20 
  -7  -1  -1  665.29  100.33 
   7   1   1  442.10   98.02 
  -8  -1  -1   17.89    3.13 
  -8  -1  -1    5.22   15.28 
  -8  -1  -1   22.34   16.61 
  -8  -1  -1   12.35    3.18 
   8   1   1    2.71    9.09 
   8   1   1   11.30    2.56 
   8   1   1   22.20    8.34 
  -8  -1  -1  -53.51   74.34 
   8   1   1   48.41   56.30 
  -9  -1  -1  497.87   38.86 
  -9  -1  -1  504.82   24.18 
  -9  -1  -1  480.73   27.54 
  -9  -1  -1  432.42   49.29 
   9   1   1  440.74   38.82 
   9   1   1  533.49   37.34 
   9   1   1  505.55   49.72 
   9   1   1  481.47   35.95 
  -9  -1  -1  454.11   89.94 
   9   1   1  442.22   87.75 
 -10  -1  -1  117.29   25.10 
 -10  -1  -1  128.82   24.71 
 -10  -1  -1  115.11    9.97 
  10   1   1  123.35   19.63 
  10   1   1  133.00   10.18 
  10   1   1  146.16   19.66 
  10   1   1  136.38   19.75 
 -10  -1  -1  -38.94   82.36 
  10   1   1  113.71   56.38 
 -11  -1  -1   25.33   19.81 
  11   1   1   13.16   13.15 
  11   1   1   -3.33   16.42 
 -12  -1  -1   68.03    6.61 
  12   1   1   85.13   18.24 
  12   1   1   78.43   22.00 
  11  -2  -1   38.38   17.10 
  11  -2  -1   51.96   24.99 
 -11   2   1   50.83    9.21 
  10  -2  -1   20.58    4.02 
  10  -2  -1   28.68   20.88 
  10  -2  -1   41.20   18.88 
   9  -2  -1   28.18    3.78 
   9  -2  -1   25.69   13.21 
   9  -2  -1   53.52   16.45 
   9  -2  -1   44.48   14.45 
  -9   2   1   21.96   17.11 
  -9   2   1   -3.36   20.63 
   9  -2  -1   17.59   57.07 
  -9   2   1  -49.02   63.75 
   8  -2  -1   48.07    4.28 
   8  -2  -1   47.89   17.63 
   8  -2  -1   29.28   17.62 
   8  -2  -1   39.60   10.88 
  -8   2   1   74.81   19.74 
  -8   2   1   53.66   22.45 
   8  -2  -1   -8.28   71.95 
  -8   2   1   18.52   79.38 
   7  -2  -1   52.21    4.51 
   7  -2  -1  125.33   35.93 
   7  -2  -1   64.02   10.51 
   7  -2  -1   40.30   16.60 
  -7   2   1   63.13   18.18 
  -7   2   1   73.75   19.83 
   7  -2  -1  -48.99   62.90 
  -7   2   1   77.62   69.10 
   6  -2  -1  281.43   27.12 
   6  -2  -1  343.15   27.65 
   6  -2  -1  304.13   14.40 
   6  -2  -1  304.50   25.83 
  -6   2   1  248.40   28.85 
  -6   2   1  216.46   27.24 
   6  -2  -1  210.36   68.63 
  -6   2   1  331.64   72.68 
   5  -2  -1   16.71    1.98 
   5  -2  -1   48.55   12.02 
   5  -2  -1   18.65    9.01 
   5  -2  -1   15.22    9.46 
  -5   2   1   15.33   10.23 
  -5   2   1    4.52   12.88 
   5  -2  -1   51.71   50.35 
  -5   2   1   24.06   32.51 
   4  -2  -1  561.53   38.55 
   4  -2  -1  635.83   38.33 
   4  -2  -1  569.31   46.01 
   4  -2  -1  587.70   29.33 
  -4   2   1  590.94   40.27 
  -4   2   1  506.65   43.48 
   4  -2  -1  633.68   88.57 
  -4   2   1  627.38   79.66 
   3  -2  -1   84.42    4.84 
   3  -2  -1   71.32   11.20 
   3  -2  -1   93.99   11.76 
   3  -2  -1  117.72    9.42 
  -3   2   1   90.53   10.82 
  -3   2   1   93.97   11.49 
   3  -2  -1   48.97   27.68 
  -3   2   1   53.87   25.92 
   2  -2  -1 3143.51  222.34 
   2  -2  -1 3361.79  221.06 
   2  -2  -1 3195.86  171.36 
   2  -2  -1 3554.66  243.27 
  -2   2   1 3415.63  217.24 
  -2   2   1 3389.05  223.90 
   2  -2  -1 3170.56  337.01 
  -2   2   1 3331.86  350.87 
   1  -2  -1 1783.24  123.98 
   1  -2  -1 1967.00  127.70 
  -1   2   1 1840.92  103.45 
  -1   2   1 1888.62  147.54 
  -1   2   1 1866.11  123.32 
   1  -2  -1 1767.68  207.51 
  -1   2   1 1835.61  210.68 
  -1   2   1 1748.64  192.53 
   0  -2  -1   93.92    5.84 
   0  -2  -1  106.16    9.67 
   0  -2  -1  109.77    5.21 
   0  -2  -1   82.95   20.66 
   0   2   1  105.38    6.68 
   0   2   1   95.75   21.29 
   0   2   1  110.30    9.45 
   0  -2  -1  114.55   20.39 
   0   2   1  111.72   18.76 
  -1  -2  -1   25.13    5.71 
  -1  -2  -1   17.89    1.53 
  -1  -2  -1   18.16    1.23 
  -1  -2  -1   22.68    4.70 
   1   2   1   23.90    5.26 
   1   2   1   23.11    5.20 
   1   2   1   21.54    1.24 
  -1  -2  -1    7.36   11.02 
   1   2   1   20.90   12.06 
  -2  -2  -1  291.06   21.07 
  -2  -2  -1  310.50   14.66 
  -2  -2  -1  301.68   21.15 
   2   2   1  306.20   19.48 
   2   2   1  324.49   21.07 
   2   2   1  314.83   14.51 
   2   2   1  281.13   22.93 
   2   2   1  295.98   18.59 
  -2  -2  -1  325.14   37.65 
  -3  -2  -1  885.66   49.41 
  -3  -2  -1  876.73   40.49 
  -3  -2  -1  836.54   59.10 
  -3  -2  -1  878.42   74.93 
   3   2   1  823.33   39.12 
   3   2   1  829.37   55.04 
   3   2   1  853.65   61.96 
   3   2   1  820.44   48.12 
   3   2   1  893.40   57.94 
  -3  -2  -1  866.55   98.80 
   3   2   1  961.69  100.20 
  -4  -2  -1  107.89   13.38 
  -4  -2  -1  112.00    7.00 
  -4  -2  -1  100.65   12.66 
  -4  -2  -1  139.10    6.39 
   4   2   1  122.69   13.36 
   4   2   1  116.74    9.38 
   4   2   1  129.34    6.40 
   4   2   1  133.28   14.18 
  -4  -2  -1  128.64   35.35 
   4   2   1  160.60   30.70 
  -5  -2  -1  886.49   74.12 
  -5  -2  -1  961.52   60.78 
  -5  -2  -1  971.51   47.19 
  -5  -2  -1  977.11   76.68 
   5   2   1  978.24   67.24 
   5   2   1  952.94   91.02 
   5   2   1  906.98   44.44 
   5   2   1  904.95   65.53 
  -5  -2  -1  937.38  113.61 
   5   2   1  903.58  107.08 
  -6  -2  -1   18.99    2.15 
  -6  -2  -1   18.43   11.98 
  -6  -2  -1    9.06   11.08 
  -6  -2  -1   10.38    2.57 
   6   2   1   15.06    2.19 
   6   2   1   35.05   11.65 
   6   2   1   20.54    8.13 
   6   2   1   21.09   11.23 
  -6  -2  -1  -46.16   42.38 
   6   2   1  -16.12   32.50 
  -7  -2  -1   -6.16    8.55 
  -7  -2  -1    7.42    2.77 
  -7  -2  -1   10.02    2.69 
  -7  -2  -1    4.86   13.16 
   7   2   1   17.15   12.55 
   7   2   1    4.25    2.14 
   7   2   1    9.53    8.76 
   7   2   1   -0.19    8.86 
  -7  -2  -1  -43.76   54.34 
   7   2   1   43.71   39.84 
  -8  -2  -1   12.29   14.86 
  -8  -2  -1   15.81   15.31 
  -8  -2  -1   17.67    5.97 
  -8  -2  -1    5.56    2.21 
   8   2   1   10.05    3.45 
   8   2   1    6.70   14.01 
   8   2   1   -0.24   12.20 
   8   2   1   -3.58   10.38 
  -8  -2  -1  -54.04   75.06 
   8   2   1   20.78   46.42 
  -9  -2  -1   38.66    4.52 
  -9  -2  -1   42.91    4.22 
  -9  -2  -1   10.30   16.41 
  -9  -2  -1   31.01   17.80 
   9   2   1   36.20   14.95 
   9   2   1   49.24   13.83 
   9   2   1   37.97    4.66 
  -9  -2  -1   15.40   86.20 
   9   2   1   80.17   53.62 
 -10  -2  -1   41.86   18.99 
 -10  -2  -1   63.14   17.59 
 -10  -2  -1   70.07    5.49 
 -10  -2  -1   65.68    5.94 
  10   2   1   61.43   13.55 
  10   2   1   80.15   16.15 
  10   2   1   63.27   15.10 
  10   2   1   61.19    6.37 
 -10  -2  -1   75.38   86.05 
  10   2   1   73.61   62.76 
 -11  -2  -1   68.63    5.02 
 -11  -2  -1   44.27   24.86 
 -11  -2  -1   49.65    5.98 
  11   2   1   64.16   14.53 
  11   2   1   53.34   16.62 
  12   2   1   53.36   16.84 
  12   2   1   49.21   18.94 
  11  -3  -1    7.50   24.95 
  11  -3  -1   -2.85   22.50 
 -11   3   1   -9.95    7.57 
  10  -3  -1   47.82   15.00 
  10  -3  -1   69.04   26.17 
 -10   3   1   52.82   10.90 
   9  -3  -1  439.20   43.22 
   9  -3  -1  379.42   23.17 
   9  -3  -1  400.79   34.26 
   9  -3  -1  451.89   39.79 
  -9   3   1  400.93   53.41 
  -9   3   1  326.44   43.40 
   9  -3  -1  248.74  111.96 
  -9   3   1   99.60  128.24 
  -9   3   1   39.25   86.45 
   8  -3  -1   88.02    5.33 
   8  -3  -1   71.16   17.89 
   8  -3  -1   66.56   15.76 
   8  -3  -1   79.39   17.11 
  -8   3   1   53.51   18.46 
  -8   3   1   89.39   19.09 
   8  -3  -1   70.08   60.16 
  -8   3   1   32.01   71.11 
   7  -3  -1   -1.21   11.34 
   7  -3  -1   -5.12    2.08 
   7  -3  -1   19.21   12.49 
   7  -3  -1   -5.74    7.80 
  -7   3   1   13.12   13.74 
  -7   3   1   -0.74   12.12 
   7  -3  -1  -26.77   54.77 
  -7   3   1    0.00   55.01 
   6  -3  -1   48.57    3.23 
   6  -3  -1   70.00   17.74 
   6  -3  -1   47.69    8.90 
   6  -3  -1   65.01   14.48 
  -6   3   1   45.50   15.31 
  -6   3   1   24.75   16.43 
   6  -3  -1   49.52   46.71 
  -6   3   1   26.41   67.81 
   5  -3  -1   82.38   13.97 
   5  -3  -1   87.08    5.20 
   5  -3  -1   50.09   10.55 
   5  -3  -1   94.47   14.70 
  -5   3   1   93.73   14.85 
  -5   3   1   76.23   14.64 
   5  -3  -1  156.61   52.28 
  -5   3   1   47.30   42.44 
   4  -3  -1  650.00   34.19 
   4  -3  -1  734.78   43.76 
   4  -3  -1  657.33   45.97 
   4  -3  -1  620.83   44.23 
  -4   3   1  624.86   50.53 
  -4   3   1  665.26   45.46 
   4  -3  -1  509.31   95.27 
  -4   3   1  805.31   93.45 
   3  -3  -1 1225.05   81.33 
   3  -3  -1 1242.38   58.68 
   3  -3  -1 1203.37   84.72 
  -3   3   1 1239.39   80.73 
  -3   3   1 1150.54   95.95 
   3  -3  -1 1306.87  149.07 
  -3   3   1 1232.69  152.80 
   2  -3  -1  225.56   20.88 
   2  -3  -1  242.30   20.50 
   2  -3  -1  215.30   11.32 
  -2   3   1  269.97   20.47 
  -2   3   1  222.64   19.05 
  -2   3   1  231.79   12.58 
   2  -3  -1  182.12   45.78 
  -2   3   1  288.48   41.67 
   1  -3  -1   35.68    7.82 
   1  -3  -1   23.81    8.70 
   1  -3  -1   31.84    2.31 
  -1   3   1   28.55    8.34 
  -1   3   1   26.59    2.40 
  -1   3   1   19.90    7.59 
   1  -3  -1   -0.10   18.07 
  -1   3   1   14.33   18.42 
   0  -3  -1 1217.25   75.43 
   0  -3  -1 1179.15   65.12 
   0  -3  -1 1086.26   74.74 
   0   3   1 1144.77   77.15 
   0   3   1 1185.13   65.15 
   0   3   1 1145.81   75.09 
   0  -3  -1 1095.15  120.78 
   0   3   1 1079.41  116.35 
  -1  -3  -1 1413.20   75.74 
  -1  -3  -1 1483.33  106.19 
  -1  -3  -1 1457.45   95.24 
   1   3   1 1509.37   75.80 
   1   3   1 1512.68   99.02 
   1   3   1 1468.53   97.66 
  -1  -3  -1 1597.53  163.07 
   1   3   1 1549.55  165.29 
  -2  -3  -1  158.14    7.48 
  -2  -3  -1  166.99   13.50 
  -2  -3  -1  153.64   10.50 
  -2  -3  -1  134.28   13.49 
   2   3   1  116.06   13.59 
   2   3   1  164.58    7.86 
   2   3   1  178.06   14.75 
   2   3   1  150.24   10.10 
  -2  -3  -1  163.31   28.02 
   2   3   1   88.17   20.60 
  -3  -3  -1  139.06   12.62 
  -3  -3  -1  127.58    6.49 
  -3  -3  -1  162.56   13.74 
   3   3   1  118.06    7.23 
   3   3   1  127.04   10.76 
   3   3   1  155.67   12.56 
   3   3   1  130.61    7.58 
   3   3   1  142.96   14.26 
  -3  -3  -1  125.90   26.93 
  -3  -3  -1  102.31   20.16 
  -4  -3  -1   20.59    2.55 
  -4  -3  -1    1.81    6.35 
  -4  -3  -1   17.08    1.85 
  -4  -3  -1   14.33    8.88 
   4   3   1   14.46    2.46 
   4   3   1   23.67    7.01 
   4   3   1   -2.81    9.04 
   4   3   1   20.83    5.68 
   4   3   1   13.00    2.06 
  -4  -3  -1    1.47   18.44 
  -5  -3  -1 1983.14   89.61 
  -5  -3  -1 1992.13  129.64 
  -5  -3  -1 1909.62  122.34 
  -5  -3  -1 1964.63  104.00 
   5   3   1 1969.40   95.62 
   5   3   1 1815.22  123.41 
   5   3   1 1916.69  127.39 
   5   3   1 2030.54  136.15 
  -5  -3  -1 2029.43  235.19 
  -6  -3  -1  274.24   14.50 
  -6  -3  -1  282.45   24.92 
  -6  -3  -1  281.54   12.77 
  -6  -3  -1  222.24   22.05 
   6   3   1  271.96   22.39 
   6   3   1  261.77   19.67 
   6   3   1  260.10   14.99 
   6   3   1  261.71   26.37 
  -6  -3  -1  323.56   54.47 
   6   3   1  219.99   39.75 
  -7  -3  -1  241.22   24.00 
  -7  -3  -1  263.63   13.86 
  -7  -3  -1  264.53   14.61 
  -7  -3  -1  284.02   24.46 
   7   3   1  312.15   24.19 
   7   3   1  285.60   21.45 
   7   3   1  267.50   14.81 
   7   3   1  278.62   27.62 
  -7  -3  -1  293.30   64.96 
   7   3   1  270.56   47.40 
  -8  -3  -1    2.38    2.86 
  -8  -3  -1    0.78    2.14 
  -8  -3  -1   21.95   14.04 
  -8  -3  -1   -0.54   13.93 
   8   3   1   13.37   12.48 
   8   3   1    1.70    3.40 
   8   3   1   16.96   12.59 
   8   3   1   -5.85   10.42 
  -8  -3  -1  -22.71   64.07 
   8   3   1  -92.36   35.20 
  -9  -3  -1   44.30    4.55 
  -9  -3  -1   63.07   17.36 
  -9  -3  -1   49.42    4.28 
  -9  -3  -1   44.54   16.67 
   9   3   1   72.79   15.88 
   9   3   1   69.48   15.24 
   9   3   1   49.63    5.09 
   9   3   1   33.10   13.99 
  -9  -3  -1  -66.75   77.47 
   9   3   1   25.84   39.72 
 -10  -3  -1  115.11    7.15 
 -10  -3  -1   97.26    8.32 
 -10  -3  -1   89.84   21.53 
 -10  -3  -1  101.65   21.46 
  10   3   1  116.28   15.61 
  10   3   1  132.91   16.81 
  10   3   1   96.71    8.63 
  10   3   1  110.01   18.71 
 -10  -3  -1   77.51   89.46 
  10   3   1   34.69   46.30 
 -11  -3  -1   67.12    6.28 
 -11  -3  -1   59.26   21.23 
 -11  -3  -1   56.01    4.90 
  11   3   1   50.33   14.16 
  11   3   1   78.47   37.09 
 -12  -3  -1    5.47    3.68 
 -12  -3  -1   14.43    5.14 
  12   3   1  -12.32   15.18 
  12   3   1    4.04   19.48 
  10  -4  -1   26.17   19.14 
  10  -4  -1    4.15   19.37 
 -10   4   1   18.68   10.01 
   9  -4  -1  187.01   12.69 
   9  -4  -1  215.33   27.06 
   9  -4  -1  204.61   28.47 
   9  -4  -1  182.41   32.14 
  -9   4   1  177.16   17.52 
  -9   4   1  204.20   35.02 
   9  -4  -1  278.34   93.29 
  -9   4   1   52.96   97.90 
   8  -4  -1 1895.73  123.50 
   8  -4  -1 1823.66  122.99 
   8  -4  -1 2025.98  151.67 
   8  -4  -1 2035.94  175.18 
  -8   4   1 1603.20  194.76 
  -8   4   1 1875.18  130.72 
  -8   4   1 1659.53  132.63 
  -8   4   1  456.68  221.71 
   7  -4  -1  911.83   56.17 
   7  -4  -1  888.48   76.17 
   7  -4  -1 1033.76   87.40 
   7  -4  -1  954.28   82.16 
  -7   4   1  955.66   56.56 
  -7   4   1  789.41   73.81 
  -7   4   1  825.71   87.00 
   7  -4  -1  741.40  128.69 
  -7   4   1  613.37  124.33 
   6  -4  -1    7.79    2.12 
   6  -4  -1   31.63   18.54 
   6  -4  -1   -0.61    9.75 
   6  -4  -1   -2.76   11.36 
  -6   4   1   14.04   13.01 
  -6   4   1   -3.83   19.08 
   6  -4  -1   98.67   81.39 
  -6   4   1   17.95   53.10 
   5  -4  -1  124.01   21.11 
   5  -4  -1  171.66   14.44 
   5  -4  -1  159.66   18.96 
   5  -4  -1  136.79    7.91 
  -5   4   1  120.80   21.33 
  -5   4   1  128.24   22.66 
  -5   4   1  115.98    8.42 
   5  -4  -1  140.55   76.52 
  -5   4   1  157.46   71.59 
   4  -4  -1  194.65   13.58 
   4  -4  -1  153.11   18.76 
   4  -4  -1  154.92   18.59 
   4  -4  -1  158.34    8.12 
  -4   4   1  165.97    9.94 
  -4   4   1  157.82   18.74 
   4  -4  -1  195.21   55.72 
  -4   4   1  131.38   44.81 
   3  -4  -1  240.14   12.39 
   3  -4  -1  264.67   25.08 
   3  -4  -1  257.52   25.03 
  -3   4   1  263.53   13.91 
  -3   4   1  266.52   26.87 
  -3   4   1  223.95   22.26 
   3  -4  -1   71.31   58.99 
  -3   4   1  372.42   62.18 
   2  -4  -1  329.65   29.80 
   2  -4  -1  367.55   26.82 
  -2   4   1  268.38   27.65 
  -2   4   1  354.44   26.64 
  -2   4   1  350.12   19.13 
   2  -4  -1  250.06   57.75 
  -2   4   1  322.24   49.37 
   1  -4  -1  -12.07    9.06 
   1  -4  -1  -17.86    7.84 
   1  -4  -1    0.79    1.44 
  -1   4   1   -3.04    2.24 
  -1   4   1    2.47    8.17 
  -1   4   1    5.83    8.56 
   1  -4  -1  -12.11   25.19 
  -1   4   1   12.22   23.49 
   0  -4  -1  306.61   24.71 
   0  -4  -1  243.85   20.46 
   0  -4  -1  280.44   15.07 
   0   4   1  279.80   15.90 
   0   4   1  256.55   20.89 
   0   4   1  253.89   21.42 
   0  -4  -1  274.97   39.69 
   0  -4  -1  333.51   43.59 
   0   4   1  282.82   40.99 
  -1  -4  -1 8800.57  429.73 
  -1  -4  -1 8523.16  554.43 
  -1  -4  -1 9057.82  568.71 
   1   4   1 9016.67  593.10 
   1   4   1 8932.47  593.38 
  -1  -4  -1 8986.33  920.63 
   1   4   1 9070.44  924.15 
  -2  -4  -1  869.44   41.19 
  -2  -4  -1  789.57   54.51 
  -2  -4  -1  857.81   74.26 
  -2  -4  -1  794.65   53.98 
   2   4   1  946.49   58.67 
   2   4   1  822.18   40.32 
   2   4   1  821.07   77.75 
  -2  -4  -1  924.54  101.83 
   2   4   1  911.42  102.92 
  -3  -4  -1   -4.99    7.55 
  -3  -4  -1    6.20    6.17 
  -3  -4  -1   -3.03    2.57 
  -3  -4  -1    3.86    1.99 
   3   4   1   11.94    7.42 
   3   4   1   15.78    7.54 
   3   4   1   -0.86    3.90 
   3   4   1    2.74    1.43 
   3   4   1    2.67    1.97 
  -3  -4  -1   -4.61   18.36 
  -4  -4  -1  791.88   52.41 
  -4  -4  -1  777.40   36.13 
  -4  -4  -1  758.96   66.63 
   4   4   1  729.93   50.27 
   4   4   1  819.23   36.68 
   4   4   1  777.10   54.19 
   4   4   1  750.87   55.33 
   4   4   1  789.58   44.20 
  -4  -4  -1  813.39   90.15 
  -4  -4  -1  779.42   91.44 
   5   4   1 1409.76  580.70 
  -5  -4  -1   19.14   20.48 
  -5  -4  -1  -21.42   33.12 
  -6  -4  -1   -0.99    2.59 
  -6  -4  -1   21.24   10.68 
  -6  -4  -1    4.30    1.80 
  -6  -4  -1    4.28   10.19 
   6   4   1   14.15   11.61 
   6   4   1   -2.56    1.99 
   6   4   1   -8.54    7.52 
   6   4   1   -1.34    9.91 
  -6  -4  -1  -27.55   42.71 
  -7  -4  -1   -2.72    7.94 
  -7  -4  -1    0.29    1.85 
  -7  -4  -1   -4.08    2.82 
  -7  -4  -1   -2.86   11.39 
   7   4   1    2.39    6.40 
   7   4   1    2.88   10.71 
   7   4   1    1.92    3.22 
   7   4   1   -3.54    7.83 
  -7  -4  -1  -58.57   43.81 
  -8  -4  -1   62.79    4.75 
  -8  -4  -1   49.21   15.55 
  -8  -4  -1   92.93    5.72 
  -8  -4  -1   87.66   15.67 
   8   4   1   83.94    5.25 
   8   4   1   85.53   15.02 
   8   4   1   58.76   13.07 
   8   4   1   52.17   14.42 
  -8  -4  -1   30.01   59.67 
  -9  -4  -1  191.81   11.46 
  -9  -4  -1  155.98    8.67 
  -9  -4  -1  171.38   23.84 
  -9  -4  -1  127.04   18.19 
   9   4   1  158.02   10.64 
   9   4   1  172.97   17.16 
   9   4   1  169.51   21.31 
   9   4   1  173.51   21.43 
  -9  -4  -1  183.09   79.75 
 -10  -4  -1  111.47   20.98 
 -10  -4  -1  127.38    9.83 
 -10  -4  -1  140.03    8.13 
 -10  -4  -1  143.25   21.91 
  10   4   1  129.33   17.69 
  10   4   1  123.16   19.02 
  10   4   1  152.66   18.78 
  10   4   1  103.78    8.23 
 -10  -4  -1  112.72   84.81 
 -11  -4  -1   36.75   18.55 
 -11  -4  -1   66.17    5.91 
 -11  -4  -1   51.89    6.00 
  11   4   1   87.54   15.76 
  11   4   1   55.18   18.25 
 -12  -4  -1   21.70    4.16 
 -12  -4  -1   15.69    4.11 
  12   4   1   46.08   20.88 
  12   4   1   21.32   13.37 
  10  -5  -1  167.60   33.37 
  10  -5  -1  128.12   25.19 
 -10   5   1  174.28   17.82 
   9  -5  -1   21.97   27.82 
   9  -5  -1   27.21   13.06 
  -9   5   1   44.05   30.38 
  -9   5   1   43.89    7.68 
   9  -5  -1   37.73  138.22 
  -9   5   1 -138.53  106.06 
   8  -5  -1   30.88   18.42 
   8  -5  -1    4.10    2.83 
   8  -5  -1    1.89   23.46 
   8  -5  -1   24.64   14.67 
  -8   5   1   -7.27    7.19 
  -8   5   1    7.34   25.54 
   8  -5  -1   -5.66   79.40 
  -8   5   1 -151.34  100.45 
  -8   5   1   43.96  115.19 
   7  -5  -1  544.13   46.59 
   7  -5  -1  503.82   30.49 
   7  -5  -1  503.86   36.20 
   7  -5  -1  525.85   42.94 
  -7   5   1  491.66   33.99 
  -7   5   1  562.92   45.17 
  -7   5   1  464.55   44.90 
   7  -5  -1  645.55  103.90 
  -7   5   1  310.47  109.11 
  -7   5   1  105.84   81.72 
   6  -5  -1   53.29   16.97 
   6  -5  -1   36.04   20.82 
   6  -5  -1   46.35   11.48 
   6  -5  -1   24.71    2.58 
  -6   5   1   23.61   22.52 
  -6   5   1   39.64   21.18 
  -6   5   1   46.53    6.30 
   6  -5  -1   16.35   92.48 
  -6   5   1   55.85   87.71 
   5  -5  -1  267.23   33.24 
   5  -5  -1  254.94   13.03 
   5  -5  -1  281.51   29.26 
   5  -5  -1  260.59   20.23 
  -5   5   1  243.57   29.82 
  -5   5   1  248.66   26.46 
  -5   5   1  247.19   14.42 
   5  -5  -1  110.51   87.45 
  -5   5   1  141.22   59.16 
   4  -5  -1   58.03   14.73 
   4  -5  -1   78.77    3.98 
   4  -5  -1   88.50   20.27 
  -4   5   1   79.26    6.49 
  -4   5   1   65.92   20.01 
  -4   5   1   71.30   14.48 
   4  -5  -1  102.73   54.40 
  -4   5   1    6.21   62.91 
   3  -5  -1  831.21   60.17 
   3  -5  -1  864.28   42.74 
   3  -5  -1  886.27   56.95 
  -3   5   1  871.46   56.45 
  -3   5   1  855.57   43.86 
  -3   5   1  841.89   58.82 
   3  -5  -1  837.43  114.03 
  -3   5   1  956.70  113.54 
   2  -5  -1   31.00   16.86 
   2  -5  -1   17.92   14.14 
  -2   5   1    9.90   13.10 
  -2   5   1    9.79    3.25 
  -2   5   1   13.01   15.05 
   2  -5  -1  -19.90   49.76 
  -2   5   1    8.21   14.97 
  -2   5   1   30.95   48.36 
   1  -5  -1  292.04   90.12 
   1  -5  -1  242.18   24.26 
  -1   5   1  260.00   26.16 
  -1   5   1  269.23   13.89 
  -1   5   1  292.09   26.93 
   1  -5  -1  205.69   54.67 
  -1   5   1  267.62   54.04 
   0  -5  -1   91.09    5.99 
   0  -5  -1   95.60   15.70 
   0  -5  -1  105.24   18.02 
   0   5   1  100.82   15.74 
   0   5   1  113.87   16.54 
   0   5   1  103.58    6.16 
   0  -5  -1  126.68   42.81 
   0   5   1   75.31   37.04 
  -1  -5  -1 1012.50   62.57 
  -1  -5  -1  992.95   67.94 
  -1  -5  -1  969.97   47.34 
  -1  -5  -1 1022.40   56.25 
   1   5   1  859.05   61.11 
   1   5   1 1005.10   69.56 
  -1  -5  -1  926.83  108.73 
   1   5   1  952.18  104.94 
  -2  -5  -1 1986.89   94.25 
  -2  -5  -1 1903.68  126.21 
  -2  -5  -1 1949.94  131.52 
   2   5   1 1816.55  128.37 
   2   5   1 1971.78  138.41 
  -2  -5  -1 2208.54  216.09 
   2   5   1 1850.62  210.29 
  -3  -5  -1  856.01   56.70 
  -3  -5  -1  777.79   66.01 
  -3  -5  -1  858.65   56.38 
  -3  -5  -1  919.40   42.55 
   3   5   1  867.28   63.20 
   3   5   1  908.36   47.63 
   3   5   1  873.52   56.87 
  -3  -5  -1 1041.53  114.64 
   3   5   1 1042.77  116.66 
  -4  -5  -1 1243.38   80.06 
  -4  -5  -1 1163.84   75.52 
  -4  -5  -1 1294.35   58.61 
  -4  -5  -1 1217.92   84.43 
   4   5   1 1132.08   73.97 
   4   5   1 1145.25   65.80 
   4   5   1 1256.87   64.17 
   4   5   1 1282.80   84.05 
   4   5   1 1196.34   80.76 
  -4  -5  -1 1437.06  159.84 
  -5  -5  -1  233.89   11.19 
  -5  -5  -1  199.83   18.17 
  -5  -5  -1  216.27   21.20 
   5   5   1  240.37   18.59 
   5   5   1  248.72   22.44 
   5   5   1  231.09   19.24 
   5   5   1  223.81   10.74 
   5   5   1  210.90   15.78 
  -5  -5  -1  229.81   39.82 
  -5  -5  -1  239.05   46.38 
  -6  -5  -1  275.21   24.74 
  -6  -5  -1  264.89   23.98 
  -6  -5  -1  320.93   14.41 
   6   5   1  317.48   14.58 
   6   5   1  283.48   24.51 
   6   5   1  282.24   21.20 
   6   5   1  282.11   18.99 
   6   5   1  252.30   27.57 
  -6  -5  -1  142.56   44.73 
  -6  -5  -1  349.30   57.01 
  -7  -5  -1 1271.28  101.64 
  -7  -5  -1 1385.13   84.56 
  -7  -5  -1 1282.56   61.31 
   7   5   1 1210.76  112.29 
   7   5   1 1157.48   92.72 
   7   5   1 1279.47   97.81 
   7   5   1 1237.30   64.08 
  -7  -5  -1 1267.68  202.35 
  -7  -5  -1 1110.79  129.70 
  -8  -5  -1  661.13   33.34 
  -8  -5  -1  628.97   50.13 
  -8  -5  -1  586.80   43.14 
   8   5   1  643.36   51.08 
   8   5   1  664.99   54.91 
   8   5   1  620.29   36.09 
   8   5   1  607.84   51.30 
  -8  -5  -1  488.68   94.06 
  -8  -5  -1  536.20   77.90 
  -9  -5  -1   41.95   16.71 
  -9  -5  -1   38.99   14.99 
  -9  -5  -1   60.12    5.34 
   9   5   1   57.64    4.88 
   9   5   1   65.07   15.37 
   9   5   1   64.33   15.50 
   9   5   1   47.88   11.20 
  -9  -5  -1   84.54   50.40 
  -9  -5  -1   64.86   66.62 
 -10  -5  -1    8.78   14.86 
 -10  -5  -1    5.84    3.02 
 -10  -5  -1  -25.25   14.97 
  10   5   1    7.34   12.92 
  10   5   1    7.41    5.18 
  10   5   1    5.00   14.44 
  10   5   1    6.36   14.31 
 -10  -5  -1 -100.91   79.27 
 -10  -5  -1  -24.51   50.97 
 -11  -5  -1    3.03    3.17 
 -11  -5  -1   -7.23   16.23 
  11   5   1    0.79   16.48 
  11   5   1   -3.27    9.25 
 -11  -5  -1   -4.53   63.71 
 -12  -5  -1   17.89    5.59 
  12   5   1    9.82   13.57 
  12   5   1   32.39   12.51 
  10  -6  -1   18.37   21.49 
  10  -6  -1  -22.20   21.95 
 -10   6   1    5.03    7.78 
   9  -6  -1   31.77   29.97 
   9  -6  -1    6.97   12.22 
  -9   6   1    4.12   22.46 
  -9   6   1    9.49    9.34 
   8  -6  -1  457.44   37.25 
   8  -6  -1  492.93   44.90 
   8  -6  -1  439.00   33.05 
   8  -6  -1  512.92   64.92 
  -8   6   1  444.05   33.20 
  -8   6   1  505.82   45.56 
   8  -6  -1  288.43  103.03 
  -8   6   1  -33.90  106.98 
   7  -6  -1  290.00   32.72 
   7  -6  -1  323.04   34.06 
   7  -6  -1  262.31   23.56 
   7  -6  -1  304.12   21.24 
  -7   6   1  299.95   20.11 
  -7   6   1  340.16   35.02 
  -7   6   1  280.93   35.13 
   7  -6  -1  216.00   91.71 
  -7   6   1  152.35   95.27 
  -7   6   1   68.92   80.80 
   6  -6  -1  448.93   22.91 
   6  -6  -1  439.78   44.75 
   6  -6  -1  461.44   43.38 
   6  -6  -1  437.77   64.68 
  -6   6   1  433.98   55.83 
  -6   6   1  422.65   44.47 
  -6   6   1  447.93   26.45 
   6  -6  -1  226.49  117.33 
  -6   6   1  348.05  107.08 
  -6   6   1  206.58   91.15 
   5  -6  -1  452.69   24.95 
   5  -6  -1  415.17   47.91 
   5  -6  -1  496.91   43.21 
   5  -6  -1  547.38   32.77 
  -5   6   1  458.37   48.68 
  -5   6   1  427.51   29.36 
  -5   6   1  500.72   46.11 
   5  -6  -1  561.29  120.17 
  -5   6   1  242.94   55.82 
  -5   6   1  123.02   89.81 
   4  -6  -1  553.84   48.25 
   4  -6  -1  576.52   26.98 
   4  -6  -1  604.62   44.87 
  -4   6   1  565.69   44.35 
  -4   6   1  570.04   31.25 
  -4   6   1  548.70   43.15 
   4  -6  -1  525.15   85.98 
  -4   6   1  282.92   68.52 
  -4   6   1  493.04   94.63 
   3  -6  -1 1035.66   66.43 
   3  -6  -1  913.92   67.83 
  -3   6   1 1067.30   70.60 
  -3   6   1  995.52   65.54 
  -3   6   1 1009.98   48.99 
   3  -6  -1 1020.07  127.54 
  -3   6   1  935.50  131.08 
  -3   6   1  914.21  128.25 
   2  -6  -1  523.05   40.73 
   2  -6  -1  603.41   56.15 
  -2   6   1  479.79   41.80 
  -2   6   1  581.91   51.45 
  -2   6   1  539.90   26.57 
   2  -6  -1  603.71   88.25 
  -2   6   1  340.01   78.18 
   1  -6  -1    5.17   17.39 
   1  -6  -1   24.42   11.09 
  -1   6   1   -1.97    9.35 
  -1   6   1   40.44   17.12 
  -1   6   1  187.18  329.98 
   1  -6  -1   26.16   36.42 
  -1   6   1    9.31   34.30 
   0  -6  -1   67.24    4.58 
   0  -6  -1   48.92   11.60 
   0  -6  -1   76.15   15.03 
   0   6   1   44.35   12.43 
   0   6   1   48.99   12.17 
   0   6   1   70.44    4.26 
   0  -6  -1  127.74   38.13 
   0   6   1   46.21   30.85 
  -1  -6  -1  650.13   46.34 
  -1  -6  -1  625.43   33.34 
  -1  -6  -1  625.44   45.69 
  -1  -6  -1  599.82   30.63 
   1   6   1  659.05   49.33 
   1   6   1  634.24   46.71 
  -1  -6  -1  595.59   87.71 
  -1  -6  -1  753.46   83.87 
   1   6   1  594.95   83.15 
  -2  -6  -1  330.49   26.11 
  -2  -6  -1  271.26   26.09 
  -2  -6  -1  312.67   14.99 
   2   6   1  313.08   26.11 
   2   6   1  326.07   25.07 
  -2  -6  -1  266.66   53.87 
   2   6   1  261.07   44.87 
  -3  -6  -1 1497.44  111.63 
  -3  -6  -1 1583.34  123.69 
  -3  -6  -1 1325.02  115.85 
  -3  -6  -1 1618.64   73.20 
   3   6   1 1489.54  100.52 
   3   6   1 1450.61   93.75 
  -3  -6  -1 1411.74  162.89 
   3   6   1 1693.26  172.79 
  -4  -6  -1  367.78   27.71 
  -4  -6  -1  389.64   17.97 
  -4  -6  -1  405.47   29.55 
  -4  -6  -1  378.45   24.72 
   4   6   1  382.47   21.45 
   4   6   1  318.89   27.45 
   4   6   1  406.93   28.24 
  -4  -6  -1  421.25   58.31 
  -5  -6  -1  522.56   37.83 
  -5  -6  -1  466.13   33.73 
  -5  -6  -1  497.43   22.53 
  -5  -6  -1  531.62   36.32 
   5   6   1  489.58   24.37 
   5   6   1  479.43   36.90 
   5   6   1  406.22   35.80 
   5   6   1  504.06   31.67 
  -5  -6  -1  492.71   65.98 
  -5  -6  -1  509.39   67.84 
  -6  -6  -1  262.13   12.01 
  -6  -6  -1  210.29   23.14 
  -6  -6  -1  276.82   23.76 
   6   6   1  211.34   24.60 
   6   6   1  259.67   12.84 
   6   6   1  249.71   14.56 
   6   6   1  226.55   18.57 
   6   6   1  256.58   25.35 
  -6  -6  -1  318.69   54.79 
  -6  -6  -1  231.64   55.48 
  -7  -6  -1  624.94   42.51 
  -7  -6  -1  617.29   31.63 
  -7  -6  -1  676.80   52.76 
   7   6   1  584.67   45.13 
   7   6   1  647.00   31.89 
   7   6   1  593.13   43.43 
   7   6   1  720.98   44.35 
  -7  -6  -1  526.03   89.05 
  -7  -6  -1  549.38   77.68 
  -8  -6  -1  728.39   36.65 
  -8  -6  -1  774.27   63.78 
  -8  -6  -1  636.58   67.62 
   8   6   1  690.73   51.50 
   8   6   1  700.56   61.12 
   8   6   1  753.07   37.34 
   8   6   1  757.74   60.51 
  -8  -6  -1  536.78   93.80 
  -8  -6  -1  695.37   92.72 
  -9  -6  -1 1930.63  101.54 
  -9  -6  -1 1712.29  170.52 
  -9  -6  -1 1872.27  197.59 
   9   6   1 1967.09  186.19 
   9   6   1 1865.28  115.19 
   9   6   1 2028.11  193.79 
   9   6   1 1941.62  187.45 
  -9  -6  -1 1926.93  207.76 
  -9  -6  -1 1371.70  253.99 
 -10  -6  -1  721.67   90.28 
 -10  -6  -1  771.14   43.04 
 -10  -6  -1  795.92   67.48 
  10   6   1  826.31   96.51 
  10   6   1  817.46   64.26 
  10   6   1  773.97   85.19 
 -10  -6  -1  581.68   94.82 
 -10  -6  -1  737.20  109.77 
 -11  -6  -1    5.80   14.31 
 -11  -6  -1    3.44    4.49 
  11   6   1   -8.46   14.90 
  11   6   1    5.73   12.03 
 -11  -6  -1   -4.67   51.13 
 -12  -6  -1    5.61    5.40 
  12   6   1    7.45   10.92 
  12   6   1  -10.96   18.62 
   9  -7  -1    5.03   18.32 
   9  -7  -1    1.18   20.86 
  -9   7   1   22.84    7.50 
   8  -7  -1    9.55   21.93 
   8  -7  -1    5.54   20.18 
   8  -7  -1    8.68   15.90 
  -8   7   1    2.18    8.37 
  -8   7   1   22.05   23.55 
   8  -7  -1   23.15  106.58 
  -8   7   1  -27.80   85.34 
   7  -7  -1   31.66    3.01 
   7  -7  -1   35.63   20.94 
   7  -7  -1   29.76   27.44 
   7  -7  -1   22.22   10.02 
  -7   7   1   77.57   32.44 
  -7   7   1   33.25    7.86 
   7  -7  -1  -67.06  127.15 
  -7   7   1  -16.76   77.89 
  -7   7   1  112.40  137.96 
   6  -7  -1   29.51   18.32 
   6  -7  -1   14.24    1.99 
   6  -7  -1    6.54   18.10 
   6  -7  -1   19.75   11.50 
  -6   7   1   42.51   20.37 
  -6   7   1    4.50    4.29 
  -6   7   1   37.61   19.11 
   6  -7  -1  -75.25   83.70 
  -6   7   1  -16.30   72.90 
  -6   7   1  -69.67   91.41 
   5  -7  -1   42.88   23.73 
   5  -7  -1   13.78   17.59 
   5  -7  -1   48.49   10.72 
   5  -7  -1   37.01    2.41 
  -5   7   1   26.91    5.91 
  -5   7   1    7.30   16.06 
  -5   7   1   19.99   22.74 
   5  -7  -1   42.76  106.28 
  -5   7   1   91.64   63.11 
  -5   7   1    3.18   93.78 
   4  -7  -1   32.77   21.50 
   4  -7  -1   77.17    4.45 
   4  -7  -1   92.79   20.04 
  -4   7   1  105.44   22.10 
  -4   7   1   72.96   18.00 
  -4   7   1   67.33    6.88 
   4  -7  -1  -40.62   91.39 
  -4   7   1   24.18   42.61 
  -4   7   1   42.94   57.88 
   3  -7  -1  168.28   27.36 
   3  -7  -1  155.53   20.88 
  -3   7   1  162.43   20.52 
  -3   7   1  180.77   26.33 
  -3   7   1  157.46    9.97 
   3  -7  -1  172.63   65.98 
  -3   7   1   77.72   74.51 
   2  -7  -1    9.47   18.81 
   2  -7  -1   10.64   12.24 
  -2   7   1    5.55    3.44 
  -2   7   1   18.73   11.71 
  -2   7   1    7.40   18.28 
   2  -7  -1  -44.46   49.06 
  -2   7   1   33.09   63.34 
   1  -7  -1   54.72   15.89 
   1  -7  -1   37.24   13.24 
  -1   7   1   67.64   15.49 
  -1   7   1   58.61    4.48 
  -1   7   1   35.81   12.56 
   1  -7  -1  141.32   48.24 
  -1   7   1  110.72   44.39 
   0  -7  -1  206.44   20.73 
   0  -7  -1  189.04   11.61 
   0  -7  -1  229.22   26.85 
   0   7   1  196.68   10.47 
   0   7   1  188.61   20.28 
   0   7   1  260.82   25.48 
   0  -7  -1  220.52   52.73 
   0   7   1  153.09   55.51 
  -1  -7  -1   21.04  139.53 
  -1  -7  -1   -8.74   12.00 
  -1  -7  -1   10.16   10.17 
   1   7   1   -7.88    9.47 
   1   7   1   20.41   11.60 
  -1  -7  -1   13.07   42.32 
  -1  -7  -1  -17.09   34.90 
   1   7   1   58.40   47.06 
  -2  -7  -1  112.22    5.68 
  -2  -7  -1   64.01   15.48 
  -2  -7  -1   91.03   14.30 
  -2  -7  -1  114.72    6.25 
   2   7   1  134.94   16.36 
   2   7   1  140.82   16.04 
  -2  -7  -1   64.76   35.63 
  -2  -7  -1   99.02   52.84 
   2   7   1   40.33   34.84 
  -3  -7  -1   55.31    4.02 
  -3  -7  -1   58.22    5.88 
  -3  -7  -1   31.45   16.61 
  -3  -7  -1   55.23   12.29 
   3   7   1   45.10   15.06 
   3   7   1   57.00   12.06 
  -3  -7  -1  123.21   37.80 
   3   7   1  100.35   47.59 
  -4  -7  -1  254.27   22.08 
  -4  -7  -1  197.58   20.03 
  -4  -7  -1  199.55    9.27 
  -4  -7  -1  153.51   12.52 
   4   7   1  172.50   18.20 
   4   7   1  219.02   21.61 
  -4  -7  -1  236.72   51.69 
   4   7   1  162.59   40.55 
  -5  -7  -1    8.84   10.45 
  -5  -7  -1   -1.21    3.78 
  -5  -7  -1    2.09    8.80 
  -5  -7  -1    1.57    2.87 
   5   7   1   -4.53    8.58 
   5   7   1    6.45    9.26 
   5   7   1    2.38    3.11 
  -5  -7  -1  -27.97   28.03 
  -6  -7  -1    3.48   18.48 
  -6  -7  -1   -0.38    3.14 
  -6  -7  -1    9.52    9.10 
   6   7   1   -9.75   12.66 
   6   7   1    7.01    8.85 
   6   7   1   -8.49    3.07 
  -6  -7  -1  -58.84   40.54 
  -6  -7  -1  -25.84   40.48 
  -7  -7  -1  439.55   35.86 
  -7  -7  -1  449.12   34.02 
  -7  -7  -1  447.26   21.56 
   7   7   1  451.06   23.27 
   7   7   1  443.56   36.77 
   7   7   1  475.89   39.56 
   7   7   1  460.64   31.37 
  -7  -7  -1  440.28   72.88 
  -7  -7  -1  470.79   70.84 
  -8  -7  -1   15.24   13.94 
  -8  -7  -1    2.28    2.73 
  -8  -7  -1   -1.76   12.82 
   8   7   1  -12.07   10.21 
   8   7   1   12.89   12.94 
   8   7   1   -1.72   46.46 
  -8  -7  -1  -26.42   46.56 
  -8  -7  -1  -48.83   58.44 
  -9  -7  -1   43.00    4.42 
  -9  -7  -1   41.82   15.12 
  -9  -7  -1   28.92   14.90 
   9   7   1   54.31   15.10 
   9   7   1   39.69   15.31 
   9   7   1   59.24   11.26 
  -9  -7  -1   42.93   66.28 
  -9  -7  -1   75.05   51.34 
 -10  -7  -1   47.35    5.59 
 -10  -7  -1  182.42   65.03 
 -10  -7  -1   55.95   15.93 
  10   7   1   40.69   11.95 
  10   7   1   27.50   14.22 
  10   7   1   51.75   15.50 
 -10  -7  -1   43.78   52.69 
 -11  -7  -1   11.41    5.17 
 -11  -7  -1   24.23   17.19 
  11   7   1   23.00   17.12 
  11   7   1   22.29   12.41 
 -11  -7  -1    9.13   51.90 
 -12  -7  -1  145.26   10.22 
  12   7   1  104.97   23.77 
   9  -8  -1   18.38   14.66 
   9  -8  -1   48.98   28.82 
  -9   8   1   15.37   10.33 
   8  -8  -1   65.11   25.76 
   8  -8  -1   73.86   19.24 
  -8   8   1   81.79   29.43 
  -8   8   1   67.32   10.17 
   8  -8  -1  184.69  181.78 
   7  -8  -1   84.98   32.22 
   7  -8  -1   88.10   25.33 
   7  -8  -1  127.51   15.92 
  -7   8   1  139.07   36.78 
  -7   8   1  116.00   11.48 
   7  -8  -1  129.71  114.41 
  -7   8   1  114.74  134.64 
   6  -8  -1  120.89   26.05 
   6  -8  -1  130.17   32.73 
   6  -8  -1  114.85   16.54 
   6  -8  -1  137.14    8.60 
  -6   8   1  123.83   26.75 
  -6   8   1  148.99   10.99 
   6  -8  -1  284.74  150.64 
  -6   8   1  195.93   93.63 
   5  -8  -1  325.80   37.73 
   5  -8  -1  315.69   20.56 
   5  -8  -1  341.14   35.93 
   5  -8  -1  403.54   26.29 
  -5   8   1  307.18   36.10 
  -5   8   1  324.42   21.07 
  -5   8   1  313.15   35.57 
   5  -8  -1   17.92   81.95 
  -5   8   1  110.40   84.23 
   4  -8  -1  375.34   20.63 
   4  -8  -1  343.82   39.51 
   4  -8  -1  388.38   37.29 
  -4   8   1  422.50   37.90 
  -4   8   1  346.48   36.85 
  -4   8   1  429.48   25.13 
   4  -8  -1  206.48  116.48 
  -4   8   1  374.71   89.79 
   3  -8  -1 1158.08   81.18 
   3  -8  -1 1222.36   94.29 
  -3   8   1 1206.04   82.95 
  -3   8   1 1219.42  100.98 
  -3   8   1 1199.85   63.12 
   3  -8  -1  955.92  136.84 
  -3   8   1  936.05  144.22 
   2  -8  -1  204.52   27.62 
   2  -8  -1  207.40   31.87 
  -2   8   1  209.77   27.23 
  -2   8   1  222.08   14.73 
  -2   8   1  223.00   30.41 
   2  -8  -1  159.57   83.24 
  -2   8   1  159.72   77.61 
   1  -8  -1  790.28   60.38 
   1  -8  -1  865.19   60.02 
  -1   8   1  783.33   57.14 
  -1   8   1  863.72   63.25 
  -1   8   1  903.91   42.76 
   1  -8  -1  789.19  122.44 
  -1   8   1  926.00  114.96 
   0  -8  -1   16.17   12.38 
   0  -8  -1   27.51   16.98 
   0   8   1   21.97   13.69 
   0   8   1   18.45   12.32 
   0  -8  -1  -14.42   45.57 
   0   8   1   55.23   42.99 
  -1  -8  -1  262.96   15.18 
  -1  -8  -1  252.58   12.18 
  -1  -8  -1  221.28   25.96 
   1   8   1  253.49   29.72 
   1   8   1  278.51   40.62 
  -1  -8  -1  222.18   69.84 
   1   8   1  199.74   62.60 
  -2  -8  -1    0.90   10.57 
  -2  -8  -1   12.37    1.94 
  -2  -8  -1   22.78   18.93 
  -2  -8  -1    7.61    1.91 
   2   8   1   12.28   11.19 
   2   8   1   34.53   16.93 
  -2  -8  -1   31.52   40.21 
  -2  -8  -1  -51.18   57.50 
   2   8   1  -36.88   49.89 
  -3  -8  -1   85.14   20.55 
  -3  -8  -1   49.84    3.93 
  -3  -8  -1   48.32    6.02 
  -3  -8  -1   53.07   15.95 
   3   8   1   26.15   15.24 
   3   8   1   49.38   16.55 
  -3  -8  -1  141.93   57.28 
  -3  -8  -1  121.92   56.60 
   3   8   1   77.57   53.54 
  -4  -8  -1   84.74    7.76 
  -4  -8  -1  107.66   18.62 
  -4  -8  -1  123.48   17.66 
  -4  -8  -1   99.02    5.80 
   4   8   1  108.26   15.38 
   4   8   1   83.98   14.17 
  -4  -8  -1  121.01   52.95 
   4   8   1   -4.16   49.26 
  -5  -8  -1  866.74   40.54 
  -5  -8  -1  835.76   57.03 
  -5  -8  -1  878.04   78.95 
  -5  -8  -1  779.60   63.92 
   5   8   1  890.70   47.71 
   5   8   1  843.07   56.78 
   5   8   1  932.13   63.22 
  -5  -8  -1 1040.74  121.65 
  -6  -8  -1  980.30   67.51 
  -6  -8  -1 1061.72   49.20 
  -6  -8  -1 1019.15   84.01 
  -6  -8  -1  976.93   78.64 
   6   8   1  873.16   88.40 
   6   8   1 1019.91   66.77 
   6   8   1  959.30   68.33 
  -6  -8  -1 1031.11  125.78 
  -7  -8  -1   10.29    3.75 
  -7  -8  -1   15.06   10.82 
  -7  -8  -1    3.91   15.48 
   7   8   1    2.05    9.16 
   7   8   1   15.29   14.39 
   7   8   1   14.75    3.88 
  -7  -8  -1   53.81   35.79 
  -7  -8  -1   54.27   54.87 
  -8  -8  -1   18.73    4.54 
  -8  -8  -1   32.48   16.02 
  -8  -8  -1   27.09   15.75 
   8   8   1   46.67   14.81 
   8   8   1   27.10    4.40 
   8   8   1   49.51   15.91 
  -8  -8  -1   56.39   50.41 
  -8  -8  -1   87.89   66.19 
  -9  -8  -1  249.14   26.53 
  -9  -8  -1  289.48   27.04 
  -9  -8  -1  281.51   15.52 
   9   8   1  280.08   32.09 
   9   8   1  256.60   31.36 
  -9  -8  -1   95.37   55.65 
  -9  -8  -1  194.49   77.25 
 -10  -8  -1  198.05   14.07 
 -10  -8  -1  233.91   24.40 
  10   8   1  216.00   23.99 
  10   8   1  177.61   27.23 
 -10  -8  -1  149.07   57.57 
 -11  -8  -1   -4.67   11.53 
 -11  -8  -1    6.23    5.12 
  11   8   1    0.75   14.11 
 -11  -8  -1   96.38   66.91 
 -12  -8  -1    4.79    5.80 
  12   8   1   26.94   14.39 
   8  -9  -1   22.41   18.33 
   8  -9  -1   68.33   28.45 
  -8   9   1   47.61    7.91 
  -8   9   1   30.80   28.81 
   8  -9  -1   99.97  197.18 
   7  -9  -1   14.24   11.12 
   7  -9  -1   14.70   25.47 
   7  -9  -1   48.96   33.24 
  -7   9   1   -6.78   34.29 
  -7   9   1   18.82    6.00 
   7  -9  -1  -68.29  126.44 
   6  -9  -1   48.82   14.20 
   6  -9  -1   58.57   33.50 
   6  -9  -1   23.48   21.69 
   6  -9  -1   41.30    3.66 
  -6   9   1   36.98    7.68 
  -6   9   1   59.43   25.29 
   6  -9  -1  -16.78  157.44 
  -6   9   1   50.08   87.91 
   5  -9  -1  181.99   15.41 
   5  -9  -1  146.41   10.21 
   5  -9  -1  123.70   27.29 
   5  -9  -1  131.25   27.04 
  -5   9   1  126.73   27.59 
  -5   9   1  130.59    9.78 
   5  -9  -1  119.30  103.65 
  -5   9   1  110.23   88.86 
   4  -9  -1   10.05    1.47 
   4  -9  -1  -18.55   16.63 
   4  -9  -1    7.95   19.06 
  -4   9   1    9.86    5.14 
  -4   9   1   10.12   15.73 
  -4   9   1   35.65   20.47 
   4  -9  -1  -15.61   82.11 
  -4   9   1  -17.25   74.27 
   3  -9  -1  178.33   32.38 
   3  -9  -1  146.21   27.33 
  -3   9   1  122.87   24.79 
  -3   9   1  126.49   29.53 
  -3   9   1  135.29    9.86 
   3  -9  -1   21.16  105.71 
  -3   9   1  217.52  100.08 
   2  -9  -1  244.11   35.86 
   2  -9  -1  262.90   29.52 
  -2   9   1  299.42   16.67 
  -2   9   1  241.45   36.70 
  -2   9   1  336.23   29.52 
   2  -9  -1  316.70   80.39 
  -2   9   1   92.49   83.80 
   1  -9  -1   76.12   20.39 
   1  -9  -1   42.26   20.49 
  -1   9   1   19.09   18.66 
  -1   9   1   27.91   15.85 
  -1   9   1   49.18    5.70 
   1  -9  -1   98.74   84.41 
  -1   9   1   -8.01   49.19 
   0  -9  -1  805.67   52.92 
   0  -9  -1  783.92   64.42 
   0  -9  -1  874.54   61.52 
   0  -9  -1  796.49   44.57 
   0   9   1  736.79   63.98 
   0   9   1  697.84   55.77 
   0  -9  -1  957.78  124.23 
   0   9   1  795.67  127.73 
  -1  -9  -1 1101.72   68.04 
  -1  -9  -1 1011.85   65.80 
  -1  -9  -1 1005.66   47.91 
  -1  -9  -1 1015.38   75.25 
   1   9   1  918.07   72.09 
   1   9   1 1005.22   67.06 
  -1  -9  -1  980.83  146.71 
   1   9   1  986.97  131.41 
  -2  -9  -1  783.67   40.02 
  -2  -9  -1  783.45   47.89 
  -2  -9  -1  892.62   69.47 
  -2  -9  -1  927.26   59.01 
   2   9   1  971.42   69.05 
   2   9   1  834.91   57.59 
  -2  -9  -1  763.41  114.42 
  -2  -9  -1  623.60  121.07 
   2   9   1  716.19  106.37 
  -3  -9  -1  152.49    9.12 
  -3  -9  -1  173.07   23.64 
  -3  -9  -1  173.29   22.28 
  -3  -9  -1  149.01    8.10 
   3   9   1  172.85   19.87 
   3   9   1  141.49   21.84 
  -3  -9  -1  253.31   92.98 
  -3  -9  -1   93.62   67.33 
   3   9   1  165.96   51.46 
  -4  -9  -1  125.96   10.10 
  -4  -9  -1  107.88   19.34 
  -4  -9  -1   90.72   20.12 
  -4  -9  -1  136.25    7.30 
   4   9   1  143.62   18.38 
   4   9   1  147.86   21.27 
  -4  -9  -1   99.35   63.87 
  -4  -9  -1  108.54  103.88 
   4   9   1  159.97   50.54 
  -5  -9  -1  181.51   27.41 
  -5  -9  -1  189.71    9.13 
  -5  -9  -1  164.33   12.21 
  -5  -9  -1  195.06   20.88 
   5   9   1  165.62   19.29 
   5   9   1  174.44   11.29 
   5   9   1  177.87   23.14 
  -5  -9  -1  156.23   50.68 
   5   9   1  136.81   46.68 
  -6  -9  -1    3.50    2.53 
  -6  -9  -1  -19.77   15.10 
  -6  -9  -1   26.82   18.54 
  -6  -9  -1   -2.27    4.30 
   6   9   1  -12.12   13.95 
   6   9   1   -0.39    3.87 
   6   9   1   24.86   17.30 
  -6  -9  -1   53.03   54.24 
  -7  -9  -1  237.34   26.06 
  -7  -9  -1  237.67   13.32 
  -7  -9  -1  225.73   27.26 
   7   9   1  252.24   25.56 
   7   9   1  267.15   26.57 
   7   9   1  212.71   19.80 
  -7  -9  -1  232.25   63.72 
  -7  -9  -1  174.35   60.41 
  -8  -9  -1   27.88   16.92 
  -8  -9  -1   26.27    4.75 
  -8  -9  -1   14.09   17.80 
   8   9   1    7.80   14.45 
   8   9   1   39.90    5.12 
   8   9   1   43.61   16.44 
  -8  -9  -1   54.24   65.42 
  -8  -9  -1   30.76   55.86 
  -9  -9  -1   20.26   17.26 
  -9  -9  -1   60.26   18.90 
  -9  -9  -1   24.28    5.12 
   9   9   1   19.58   14.89 
   9   9   1   48.39   16.64 
  -9  -9  -1   63.24   76.29 
  -9  -9  -1   19.07   54.19 
 -10  -9  -1   12.24    3.90 
 -10  -9  -1   20.00   17.56 
  10   9   1    4.88   13.87 
 -10  -9  -1  -28.18   65.58 
 -11  -9  -1   35.97   24.78 
  11   9   1    7.08   14.50 
 -11  -9  -1   22.20   65.19 
 -12  -9  -1    6.25    6.19 
  12   9   1   14.18   10.40 
   7 -10  -1  153.11   22.04 
   7 -10  -1  141.18   42.13 
  -7  10   1  158.16   12.94 
  -7  10   1   88.80   41.45 
   7 -10  -1  517.43  172.51 
   6 -10  -1  354.96   29.77 
   6 -10  -1  195.86   44.80 
   6 -10  -1  298.28   40.54 
  -6  10   1  364.77   43.90 
  -6  10   1  358.85   24.39 
   6 -10  -1  -62.16  164.70 
   5 -10  -1   19.17   31.85 
   5 -10  -1    0.00   21.04 
   5 -10  -1    8.38   11.45 
   5 -10  -1    1.56    1.26 
  -5  10   1   -1.17    4.36 
  -5  10   1    1.24   20.76 
   5 -10  -1  -40.22  155.34 
  -5  10   1    6.49   88.20 
   4 -10  -1   20.13   20.25 
   4 -10  -1    4.44    1.36 
   4 -10  -1    5.96   19.71 
  -4  10   1  -30.46   19.98 
  -4  10   1    2.74    4.98 
   4 -10  -1   99.16   97.90 
  -4  10   1    1.56   72.70 
   3 -10  -1   98.50   22.31 
   3 -10  -1   87.59   31.21 
  -3  10   1   98.75    7.77 
  -3  10   1  110.09   24.61 
  -3  10   1   84.38   20.23 
   3 -10  -1  204.71  100.26 
  -3  10   1   75.76  104.20 
   2 -10  -1  -15.92   22.43 
   2 -10  -1   -2.44   26.97 
  -2  10   1    2.32    3.52 
  -2  10   1   46.01   21.04 
  -2  10   1  -21.18   23.41 
   2 -10  -1   34.25  100.52 
  -2  10   1   49.42   92.07 
   1 -10  -1  127.91   31.18 
   1 -10  -1   89.55   25.03 
  -1  10   1  102.91    7.02 
  -1  10   1  144.63   28.28 
  -1  10   1   88.75   23.66 
   1 -10  -1  313.10  105.74 
  -1  10   1  126.09   88.33 
   0 -10  -1  105.86    6.08 
   0 -10  -1  100.05   24.31 
   0 -10  -1   69.40   20.91 
   0  10   1   57.50   21.66 
   0  10   1   76.85   19.64 
   0 -10  -1  104.54   86.40 
   0  10   1  159.72   64.95 
  -1 -10  -1   50.24   16.54 
  -1 -10  -1   46.63    4.52 
  -1 -10  -1   35.35   18.29 
  -1 -10  -1   45.05    4.00 
   1  10   1   36.61   16.32 
   1  10   1   83.89   17.00 
  -1 -10  -1   19.63   59.59 
   1  10   1    6.59   48.53 
  -2 -10  -1  299.27   15.21 
  -2 -10  -1  278.09   28.14 
  -2 -10  -1  292.57   17.66 
  -2 -10  -1  324.69   38.04 
   2  10   1  338.87   29.42 
   2  10   1  287.47   32.48 
  -2 -10  -1  271.21   74.40 
   2  10   1  385.14   87.22 
  -3 -10  -1    6.34   22.51 
  -3 -10  -1  -12.22   17.82 
  -3 -10  -1    0.64    1.91 
  -3 -10  -1    2.06    2.95 
   3  10   1   -4.07   17.72 
   3  10   1    2.52   16.50 
  -3 -10  -1   46.82   74.10 
  -3 -10  -1   47.90   96.23 
   3  10   1    1.38   64.99 
  -4 -10  -1  199.03   21.08 
  -4 -10  -1  322.25   30.10 
  -4 -10  -1  218.46   12.57 
  -4 -10  -1  267.18   28.07 
   4  10   1  235.49   24.71 
   4  10   1  228.69   26.94 
  -4 -10  -1  280.06   82.03 
  -4 -10  -1  278.95  122.44 
   4  10   1   87.45   55.29 
  -5 -10  -1   11.27   12.46 
  -5 -10  -1   15.56    4.27 
  -5 -10  -1   17.74    2.96 
  -5 -10  -1   17.38   25.23 
   5  10   1   12.99    4.21 
   5  10   1   14.81   12.21 
   5  10   1    3.76   12.21 
  -5 -10  -1   26.21   47.38 
  -5 -10  -1  156.79  138.42 
   5  10   1   22.22   63.01 
  -6 -10  -1   13.38    3.90 
  -6 -10  -1    2.96    5.08 
  -6 -10  -1    4.61   14.01 
  -6 -10  -1   14.26   12.41 
   6  10   1    2.61    4.09 
   6  10   1   23.02   11.97 
   6  10   1   -0.46   12.04 
  -6 -10  -1   48.54   49.37 
  -6 -10  -1   98.52  104.53 
  -7 -10  -1  173.46   10.17 
  -7 -10  -1  152.42   21.98 
  -7 -10  -1  173.34   20.98 
   7  10   1  156.70   19.66 
   7  10   1  155.72   20.46 
   7  10   1  163.84   13.33 
  -7 -10  -1   44.99   50.20 
  -7 -10  -1  -14.59  122.54 
  -7 -10  -1  120.23   47.59 
  -8 -10  -1  205.68   12.94 
  -8 -10  -1  207.21   26.72 
  -8 -10  -1  220.10   34.70 
   8  10   1  189.62   23.92 
   8  10   1  235.48   30.79 
   8  10   1  205.21   17.82 
  -8 -10  -1   85.90   72.70 
  -8 -10  -1   80.97  142.45 
  -8 -10  -1  222.77   77.98 
  -9 -10  -1   -3.09   17.58 
  -9 -10  -1   10.99    3.75 
  -9 -10  -1  -11.68   17.54 
   9  10   1   27.47   16.39 
   9  10   1   30.09   12.88 
  -9 -10  -1   13.32   41.54 
  -9 -10  -1   -6.95   76.60 
 -10 -10  -1   -4.04   17.81 
 -10 -10  -1   20.82    5.72 
  10  10   1   42.24   17.02 
 -11 -10  -1   11.38    4.22 
  11  10   1   -1.49   14.29 
   7 -11  -1   69.70   19.79 
   7 -11  -1   78.24   46.47 
  -7  11   1   43.17    9.78 
  -7  11   1   61.25   43.18 
   6 -11  -1  179.33   44.28 
   6 -11  -1  173.87   21.02 
  -6  11   1  136.39   12.17 
  -6  11   1  201.05   44.75 
   5 -11  -1  390.21   32.38 
   5 -11  -1  447.35   48.29 
  -5  11   1  502.43   49.34 
  -5  11   1  434.93   30.74 
   5 -11  -1   42.66  168.78 
  -5  11   1  225.28  111.20 
   4 -11  -1   18.08   32.65 
   4 -11  -1   20.18   10.81 
   4 -11  -1   10.98    1.57 
   4 -11  -1    9.27   40.42 
  -4  11   1   35.04   30.75 
  -4  11   1   16.23    5.83 
   4 -11  -1   85.24  153.02 
  -4  11   1   10.75  122.95 
   3 -11  -1  129.12   36.00 
   3 -11  -1  117.74   32.02 
  -3  11   1  107.70   26.02 
  -3  11   1  145.51   11.80 
   3 -11  -1  238.24  148.18 
  -3  11   1   23.74  112.79 
   2 -11  -1  192.41   30.27 
   2 -11  -1  318.94   42.40 
  -2  11   1  289.77   38.69 
  -2  11   1  315.66   22.49 
  -2  11   1  250.20   33.62 
   2 -11  -1  152.95  125.30 
  -2  11   1  144.63  109.45 
   1 -11  -1  149.10   33.42 
   1 -11  -1   59.77   20.73 
   1 -11  -1  125.70    8.25 
  -1  11   1  141.48   30.61 
  -1  11   1  105.55   21.30 
   1 -11  -1  317.24  116.68 
  -1  11   1  163.30  104.99 
   0 -11  -1  180.62   10.07 
   0 -11  -1  146.48   29.19 
   0 -11  -1  199.00   28.65 
   0  11   1  161.77   28.50 
   0  11   1  177.07   26.06 
   0 -11  -1   23.17  103.55 
   0  11   1  288.74   77.10 
  -1 -11  -1 1115.74   83.85 
  -1 -11  -1 1140.30   78.07 
  -1 -11  -1 1055.56  100.59 
  -1 -11  -1 1140.81   60.86 
   1  11   1 1086.95   87.08 
   1  11   1  916.95  103.52 
  -1 -11  -1  913.94  153.98 
   1  11   1  910.97  143.15 
  -2 -11  -1 1035.89   70.96 
  -2 -11  -1  998.75   73.03 
  -2 -11  -1  985.73   55.66 
  -2 -11  -1 1066.53   74.65 
   2  11   1 1082.43   72.81 
   2  11   1 1069.82   72.08 
  -2 -11  -1 1130.14  191.64 
   2  11   1  919.52  134.15 
  -3 -11  -1    2.97    2.23 
  -3 -11  -1    1.07   24.50 
  -3 -11  -1   -1.29   13.36 
  -3 -11  -1   -2.10    3.12 
   3  11   1   51.31   21.19 
   3  11   1   -2.73   13.04 
  -3 -11  -1 -108.82  109.40 
  -3 -11  -1   41.29   61.69 
   3  11   1   -7.01   76.56 
  -4 -11  -1   80.56    5.72 
  -4 -11  -1   71.49    5.63 
  -4 -11  -1   74.93   22.63 
  -4 -11  -1   52.33    7.26 
  -4 -11  -1   93.62   26.55 
   4  11   1   65.61   32.21 
   4  11   1   66.03   20.22 
  -4 -11  -1   10.77   80.30 
  -4 -11  -1   -6.94  120.11 
   4  11   1  115.63   80.34 
  -5 -11  -1   11.97    4.78 
  -5 -11  -1  -12.84   21.52 
  -5 -11  -1   -5.78   13.54 
   5  11   1   11.79   12.58 
   5  11   1   12.07    3.39 
   5  11   1   -6.41   18.66 
  -5 -11  -1  -26.67  139.80 
  -5 -11  -1  -36.46   55.95 
   5  11   1  -60.28   70.32 
  -6 -11  -1   44.03    4.91 
  -6 -11  -1   26.78   14.70 
  -6 -11  -1   66.02   26.63 
  -6 -11  -1   29.57    5.10 
   6  11   1   15.57   19.82 
   6  11   1   31.33    4.27 
   6  11   1   31.30   14.60 
  -6 -11  -1   90.23  157.49 
  -6 -11  -1   36.40   57.35 
  -7 -11  -1   -2.23   15.37 
  -7 -11  -1    8.22    3.21 
  -7 -11  -1   10.93   17.93 
   7  11   1   -8.68   17.01 
   7  11   1    4.57    3.41 
   7  11   1  -13.17   13.50 
  -7 -11  -1  -29.92   56.41 
  -7 -11  -1   25.53  122.67 
  -8 -11  -1   13.54   17.79 
  -8 -11  -1   21.84   22.46 
  -8 -11  -1   19.64    4.94 
   8  11   1   16.93   18.95 
   8  11   1   -7.57   16.11 
  -8 -11  -1  -59.27   72.62 
  -8 -11  -1 -116.61  219.41 
  -8 -11  -1   90.91   77.65 
  -9 -11  -1   33.72    5.93 
  -9 -11  -1   33.22   19.89 
   9  11   1   12.69   17.32 
  -9 -11  -1   43.62   76.45 
 -10 -11  -1   24.79    4.67 
  10  11   1   14.96   17.67 
 -11 -11  -1  -10.20    5.96 
  11  11   1   -3.41   15.24 
   6 -12  -1   -4.65   15.53 
   6 -12  -1  -34.33   45.63 
  -6  12   1   23.30   42.01 
  -6  12   1   -3.42    5.02 
   5 -12  -1   59.28   30.92 
   5 -12  -1   63.91   15.38 
  -5  12   1   77.91   30.72 
  -5  12   1   54.59    6.43 
   4 -12  -1  120.68   15.54 
   4 -12  -1  145.78   41.58 
  -4  12   1   95.58   10.55 
  -4  12   1  146.04   39.37 
   4 -12  -1  -46.61  122.63 
   3 -12  -1   -5.75   34.09 
   3 -12  -1    9.65    2.28 
  -3  12   1   53.59   25.04 
  -3  12   1   10.18    4.45 
   3 -12  -1  -81.60  104.23 
  -3  12   1  124.99  128.02 
   2 -12  -1   23.53    2.96 
   2 -12  -1    4.00   32.48 
  -2  12   1   72.40   31.70 
  -2  12   1   11.93    4.02 
   2 -12  -1   11.99   97.66 
  -2  12   1 -139.16  112.93 
   1 -12  -1  119.15   25.47 
   1 -12  -1  119.04   28.21 
   1 -12  -1  113.35    7.41 
  -1  12   1  112.04   25.51 
  -1  12   1   88.53   20.77 
   1 -12  -1   20.89   88.93 
  -1  12   1   78.14   81.61 
   0 -12  -1  111.34    7.75 
   0 -12  -1  121.53   31.08 
   0 -12  -1   85.53   33.96 
   0  12   1  175.60   42.69 
   0  12   1   98.18   27.04 
   0 -12  -1   30.04  110.85 
   0  12   1   42.65  101.45 
  -1 -12  -1    7.56    2.86 
  -1 -12  -1  -26.93   23.63 
  -1 -12  -1    3.39   25.45 
   1  12   1   -1.73   16.88 
   1  12   1    4.58   21.49 
  -1 -12  -1   89.89  115.70 
   1  12   1   81.56   70.76 
  -2 -12  -1   62.27    6.16 
  -2 -12  -1   57.81   19.56 
  -2 -12  -1   56.35    5.88 
  -2 -12  -1   53.12   22.48 
   2  12   1   64.60   18.23 
   2  12   1   68.10   20.28 
  -2 -12  -1  -11.02   75.92 
   2  12   1   21.50   69.14 
  -3 -12  -1   36.90    4.29 
  -3 -12  -1   37.58   23.65 
  -3 -12  -1   37.44   28.27 
  -3 -12  -1   40.56    3.73 
   3  12   1   44.96   23.28 
   3  12   1   46.47   22.70 
  -3 -12  -1   51.23  107.43 
   3  12   1   15.80   84.69 
  -4 -12  -1  493.61   56.62 
  -4 -12  -1  686.74   42.42 
  -4 -12  -1  575.99   47.21 
  -4 -12  -1  628.11   37.24 
  -4 -12  -1  784.34   80.07 
   4  12   1  561.89   46.37 
   4  12   1  573.27   58.52 
  -4 -12  -1  509.61  105.96 
  -4 -12  -1  521.99  134.99 
   4  12   1  573.91  119.39 
  -5 -12  -1  324.51   39.86 
  -5 -12  -1  294.66   27.69 
  -5 -12  -1  280.38   31.28 
  -5 -12  -1  304.89   18.66 
   5  12   1  330.04   27.08 
   5  12   1  368.04   35.81 
   5  12   1  294.42   30.04 
  -5 -12  -1  382.13  168.15 
  -5 -12  -1  256.57   85.22 
   5  12   1  578.90  111.00 
  -6 -12  -1  173.10   24.59 
  -6 -12  -1  187.84   11.46 
  -6 -12  -1  169.77   33.92 
  -6 -12  -1  183.99   14.15 
   6  12   1  169.68   15.02 
   6  12   1  165.61   22.22 
   6  12   1  155.14   28.83 
  -6 -12  -1  105.41   68.01 
  -6 -12  -1  -82.67  170.02 
  -7 -12  -1  451.03   58.91 
  -7 -12  -1  340.15   38.14 
  -7 -12  -1  409.50   25.04 
   7  12   1  365.30   42.47 
   7  12   1  414.82   47.69 
  -7 -12  -1  415.17  210.59 
  -7 -12  -1  192.67   95.25 
  -8 -12  -1   95.76    7.59 
  -8 -12  -1   95.37   21.40 
  -8 -12  -1  106.13   30.57 
   8  12   1   91.69   18.75 
   8  12   1   89.78   24.05 
  -8 -12  -1   74.82   80.23 
  -8 -12  -1   69.68   86.75 
  -9 -12  -1   -1.42    3.77 
   9  12   1    6.13   19.51 
 -10 -12  -1   21.74    6.28 
  10  12   1    8.99   14.94 
   5 -13  -1   -6.97   32.86 
   5 -13  -1   14.60   10.63 
  -5  13   1   14.68   41.90 
  -5  13   1    6.07    4.68 
   4 -13  -1    2.87   11.82 
   4 -13  -1   12.70   40.24 
  -4  13   1   16.08    5.79 
  -4  13   1    7.68   36.27 
   3 -13  -1   29.25    3.09 
   3 -13  -1    8.72   37.65 
   3 -13  -1   40.99   11.38 
  -3  13   1    6.41   24.57 
  -3  13   1   33.26    5.42 
   2 -13  -1   58.55   27.24 
   2 -13  -1   32.53    4.40 
  -2  13   1   73.52   25.98 
  -2  13   1   60.60   95.57 
   1 -13  -1    4.45    2.50 
   1 -13  -1   -6.82   23.47 
  -1  13   1   24.26   22.33 
   1 -13  -1  -52.32   94.73 
  -1  13   1  -88.77   87.08 
   0 -13  -1   25.70   24.79 
   0 -13  -1   33.85    5.04 
   0  13   1   63.00   23.49 
   0  13   1  -39.35   24.47 
   0 -13  -1   42.38  128.48 
   0  13   1   45.44   84.96 
  -1 -13  -1  136.30   11.28 
  -1 -13  -1  131.83   29.97 
   1  13   1  120.55   25.32 
   1  13   1  114.20   28.95 
  -1 -13  -1    3.25   87.22 
   1  13   1  150.41   86.53 
  -2 -13  -1  135.32   37.34 
  -2 -13  -1  205.15   16.20 
  -2 -13  -1  197.84   12.58 
   2  13   1  204.91   34.99 
   2  13   1  200.55   27.12 
  -2 -13  -1  268.24   98.05 
   2  13   1  128.15  118.06 
  -3 -13  -1   35.01    4.41 
  -3 -13  -1   28.82    3.46 
  -3 -13  -1   49.24   23.88 
   3  13   1   10.69   15.56 
   3  13   1   61.14   25.88 
  -3 -13  -1  -48.30   84.72 
   3  13   1   48.69   75.05 
  -4 -13  -1  238.68   27.70 
  -4 -13  -1  314.79   21.75 
  -4 -13  -1  306.92   20.35 
  -4 -13  -1  344.45   45.04 
   4  13   1  383.19   42.39 
   4  13   1  263.60   34.55 
  -4 -13  -1  398.86  134.24 
   4  13   1  383.88  121.74 
  -5 -13  -1  418.23   43.85 
  -5 -13  -1  435.06   30.20 
  -5 -13  -1  439.45   29.73 
  -5 -13  -1  481.57   59.84 
   5  13   1  424.36   42.44 
   5  13   1  512.41   56.82 
  -5 -13  -1  116.29  147.15 
  -5 -13  -1  481.23  131.33 
   5  13   1  533.04  122.65 
  -6 -13  -1  323.46   33.66 
  -6 -13  -1  405.48   20.30 
  -6 -13  -1  305.77   57.35 
   6  13   1  401.41   47.32 
   6  13   1  381.91   39.96 
  -6 -13  -1  108.70  209.43 
  -6 -13  -1  162.61   85.25 
  -7 -13  -1   54.17   29.73 
  -7 -13  -1   42.08    4.77 
   7  13   1   16.09   15.71 
   7  13   1   46.04   24.71 
  -7 -13  -1   93.36   73.99 
  -8 -13  -1   17.14    5.46 
   8  13   1   -3.29   15.68 
  -9 -13  -1   -3.68    3.98 
   9  13   1   -1.72   23.09 
 -10 -13  -1   11.75    6.62 
  10  13   1   25.87   18.23 
   4 -14  -1   26.60   13.94 
   4 -14  -1  -27.71   45.82 
  -4  14   1   12.76   41.81 
  -4  14   1   11.87    5.96 
   3 -14  -1   17.83   41.85 
   3 -14  -1    7.48   11.37 
  -3  14   1    4.75    3.46 
  -3  14   1   -4.01   26.82 
   2 -14  -1  -16.40   27.22 
   2 -14  -1    1.78    2.74 
  -2  14   1  -22.06   23.72 
   1 -14  -1    1.28    2.49 
   1 -14  -1   -5.68   27.27 
  -1  14   1  -25.61   22.89 
  -1  14   1  108.62   98.53 
   0 -14  -1  154.20   12.63 
   0 -14  -1  202.40   36.85 
   0  14   1  214.98   32.66 
   0  14   1   53.99   90.80 
  -1 -14  -1  116.53    7.52 
  -1 -14  -1  100.75   39.68 
   1  14   1   88.94   24.22 
   1  14   1   75.73   33.01 
  -1 -14  -1   21.66   86.25 
  -2 -14  -1   22.14   27.88 
  -2 -14  -1   15.92    3.87 
   2  14   1   21.29   27.47 
   2  14   1   13.62   20.86 
  -2 -14  -1  213.07  136.72 
   2  14   1   68.21   89.74 
  -3 -14  -1   37.37   27.43 
  -3 -14  -1   26.04    4.32 
  -3 -14  -1   14.61    3.07 
   3  14   1   14.60   18.14 
   3  14   1   32.03   20.28 
  -3 -14  -1   -4.92   87.80 
   3  14   1   86.74   90.83 
  -4 -14  -1   23.76    4.56 
  -4 -14  -1   15.85    3.03 
  -4 -14  -1   48.32   35.66 
   4  14   1   26.28   26.33 
   4  14   1   22.45   17.21 
  -4 -14  -1   52.46   93.59 
  -5 -14  -1   -9.70   22.93 
  -5 -14  -1    3.47    4.50 
  -5 -14  -1    1.01    2.73 
   5  14   1    4.07   17.54 
   5  14   1    4.72   17.80 
  -5 -14  -1  -90.66   89.62 
  -6 -14  -1    2.58   32.74 
  -6 -14  -1   -4.09    3.38 
   6  14   1  -18.31   25.13 
   6  14   1   -8.46   24.22 
  -6 -14  -1   88.57  122.60 
  -7 -14  -1   33.66   24.92 
  -7 -14  -1   23.31    5.73 
   7  14   1   19.41   18.88 
  -8 -14  -1   18.16    5.86 
   8  14   1   29.44   19.50 
  -9 -14  -1   97.63    9.32 
   9  14   1   38.94   30.72 
   2 -15  -1   -4.27    7.02 
   2 -15  -1   -5.92   32.79 
  -2  15   1   15.06   30.13 
   1 -15  -1  206.98   42.20 
  -1  15   1  150.78   34.23 
   0 -15  -1   12.32    4.09 
   0 -15  -1   -2.12   29.78 
   0  15   1   37.12   25.63 
  -1 -15  -1  257.96   42.57 
  -1 -15  -1  202.08   14.88 
   1  15   1  251.64   37.25 
  -2 -15  -1  264.99   21.39 
  -2 -15  -1  207.99   49.45 
   2  15   1  243.08   41.99 
  -3 -15  -1   74.18    6.28 
  -3 -15  -1   62.53   42.85 
   3  15   1  112.41   34.19 
   3  15   1   57.46   30.08 
  -4 -15  -1    3.06    3.20 
  -4 -15  -1    5.02   38.49 
   4  15   1   47.65   36.82 
   4  15   1   -6.53   26.52 
  -5 -15  -1   24.49    4.24 
  -5 -15  -1   92.51   32.32 
   5  15   1  -15.32   25.40 
   5  15   1   78.46   24.44 
  -6 -15  -1   79.31    7.51 
  -6 -15  -1   55.50   29.86 
   6  15   1   90.50   25.65 
  -7 -15  -1   -4.83    5.54 
   7  15   1   -2.33   29.35 
  -8 -15  -1   95.15    8.59 
   8  15   1  111.44   33.15 
   1 -16  -1   25.75   35.89 
  -1  16   1   -5.57   29.41 
   0 -16  -1  -26.07   49.02 
   0  16   1   -8.37   38.01 
  -1 -16  -1    4.01   32.20 
   1  16   1   -6.68   26.18 
  -2 -16  -1   -2.51   32.67 
  -2 -16  -1   13.33    4.25 
   2  16   1   21.77   25.00 
  -3 -16  -1  216.35   42.58 
  -3 -16  -1  145.07   12.51 
   3  16   1  157.98   31.96 
  -4 -16  -1  255.04   43.39 
  -4 -16  -1  199.02   13.28 
   4  16   1  266.25   36.65 
  -5 -16  -1   19.67    5.49 
  -5 -16  -1   19.41   43.99 
   5  16   1   -7.26   32.06 
  -6 -16  -1   39.65    6.56 
   6  16   1   31.03   23.94 
  -7 -16  -1   21.76    4.81 
   7  16   1   39.51   25.67 
  -2 -17  -1    6.00   34.78 
  -2 -17  -1   -1.77    4.12 
   2  17   1   22.70   27.58 
  -3 -17  -1   -7.80    4.60 
  -3 -17  -1   10.96   49.63 
   3  17   1   10.18   34.49 
  -4 -17  -1  110.95   89.24 
  -4 -17  -1   95.74    8.21 
   4  17   1  116.71   41.47 
   6  16  -2   48.95   31.68 
   5  16  -2   -1.15   32.35 
   4  16  -2   72.56   33.67 
  -4 -16   2   95.36   11.31 
  -4 -16   2  153.44   51.65 
   3  16  -2   37.83   32.29 
  -3 -16   2   64.60   46.58 
  -3 -16   2   33.97    5.08 
   2  16  -2   27.66   34.44 
  -2 -16   2   11.23   46.76 
   1  16  -2   -7.27   29.59 
  -1 -16   2   16.56    5.83 
  -1 -16   2   25.09   34.63 
   0  16  -2   -5.89   27.32 
   0 -16   2  -18.08   34.59 
   0 -16   2   10.03    4.83 
   1 -16   2   66.35   38.41 
   7  15  -2   21.82   27.29 
   6  15  -2  190.39   87.84 
   5  15  -2   -0.46   19.61 
  -5 -15   2   -2.43    4.46 
  -5 -15   2  -17.75   26.82 
   4  15  -2   38.81   21.39 
  -4 -15   2   -6.38   28.93 
  -4 -15   2   14.28    5.86 
   3  15  -2   60.20   23.94 
   3  15  -2   45.33   27.39 
  -3 -15   2   38.66    4.94 
  -3 -15   2   23.26   30.08 
   2  15  -2   30.78   20.15 
   2  15  -2   64.59   31.87 
  -2 -15   2   -9.45   41.39 
  -2 -15   2   23.94    5.38 
   1  15  -2    6.51   23.48 
  -1 -15   2   29.30   31.74 
  -1 -15   2   25.72    5.21 
   0  15  -2  221.37   36.01 
   0 -15   2  241.26   20.55 
   0 -15   2  245.33   50.69 
  -1  15  -2  164.06   34.87 
   1 -15   2  203.14   51.85 
   1 -15   2  153.71   14.31 
  -2  15  -2   36.47   29.41 
   2 -15   2    7.54   33.14 
   3 -15   2  -14.57   50.22 
   8  14  -2  142.01   25.99 
  -8 -14   2  147.72   13.19 
   7  14  -2  182.86   25.73 
  -7 -14   2  169.71   11.64 
   6  14  -2   41.39   23.68 
  -6 -14   2   21.22    4.78 
   5  14  -2   -4.37   19.91 
   5  14  -2   -2.71   16.07 
  -5 -14   2   -1.45   22.03 
  -5 -14   2   19.06    6.06 
   4  14  -2   15.93   15.70 
   4  14  -2   37.96   25.26 
  -4 -14   2   11.30    5.39 
  -4 -14   2   49.00   28.94 
  -4 -14   2  -24.49   33.70 
   4  14  -2   68.60   82.58 
  -4 -14   2  -12.41   77.77 
   3  14  -2   20.84   19.50 
   3  14  -2   -2.64   22.43 
  -3 -14   2   46.65   27.63 
  -3 -14   2   26.69    4.28 
   3  14  -2   21.86   82.17 
  -3 -14   2 -243.14  122.93 
   2  14  -2  204.58   33.55 
   2  14  -2  195.05   30.30 
  -2 -14   2  243.63   37.84 
  -2 -14   2  219.62   15.54 
   2  14  -2  207.34   92.30 
  -2 -14   2   62.14  132.59 
   1  14  -2   25.89   21.39 
   1  14  -2   -5.35   23.83 
  -1 -14   2   18.80   26.28 
   1  14  -2    1.50   76.29 
  -1 -14   2 -158.46  142.86 
   0  14  -2   39.28   31.36 
   0 -14   2   25.58    5.07 
   0 -14   2   45.17   39.51 
   0  14  -2  100.99  131.57 
  -1  14  -2  261.89   44.26 
   1 -14   2  209.07   48.71 
  -2  14  -2  129.83   30.52 
   2 -14   2   98.08   33.94 
  -3  14  -2    6.57   25.48 
   3 -14   2  -28.10   29.95 
  -4  14  -2   41.63   30.30 
   4 -14   2    7.16   34.32 
   9  13  -2   -0.75   23.66 
  -9 -13   2    6.05    5.07 
   8  13  -2    2.90   18.05 
  -8 -13   2    5.56    4.42 
   7  13  -2   38.69   21.07 
  -7 -13   2   -6.66    5.67 
  -7 -13   2  -22.73  104.08 
   6  13  -2   67.37   15.86 
   6  13  -2  111.16   19.93 
  -6 -13   2   69.81    7.49 
  -6 -13   2   54.79   14.02 
  -6 -13   2   84.64   22.69 
   6  13  -2   28.47   63.90 
  -6 -13   2   58.44  101.32 
   5  13  -2   73.88   18.94 
   5  13  -2   85.74   20.41 
  -5 -13   2   77.76   23.97 
  -5 -13   2   58.29   12.42 
  -5 -13   2   66.27    4.97 
  -5 -13   2   90.39    7.84 
   5  13  -2  179.83   81.66 
  -5 -13   2   96.92  108.60 
   4  13  -2    2.29   12.30 
   4  13  -2   22.71   22.63 
  -4 -13   2   13.71    3.85 
  -4 -13   2   13.44    8.02 
  -4 -13   2   41.13   31.03 
   4  13  -2   57.42   97.40 
  -4 -13   2   55.84   75.89 
   3  13  -2  340.20   37.67 
   3  13  -2  339.65   39.11 
  -3 -13   2  305.26   47.70 
  -3 -13   2  315.94   24.62 
   3  13  -2   80.70  103.04 
  -3 -13   2  242.37  121.72 
   2  13  -2  130.98   37.04 
   2  13  -2   61.49   22.80 
  -2 -13   2   86.01    7.67 
  -2 -13   2  148.92   30.00 
   2  13  -2   86.95   79.50 
  -2 -13   2  155.54  126.22 
   1  13  -2   -7.27   18.26 
   1  13  -2  -16.33   21.09 
  -1 -13   2   -2.86    4.11 
  -1 -13   2   -1.35   21.97 
   1  13  -2   35.36   78.90 
  -1 -13   2   33.76  130.05 
   0  13  -2   62.09   29.99 
   0  13  -2   97.95   22.34 
   0 -13   2  105.89   37.93 
   0  13  -2  -56.04  112.77 
   0 -13   2  268.67  114.32 
  -1  13  -2  234.47   38.85 
  -1  13  -2  209.75   39.09 
   1 -13   2  236.12   45.31 
  -1  13  -2  144.23  119.06 
   1 -13   2   22.20  157.58 
  -2  13  -2   45.52   33.19 
   2 -13   2   40.36   36.70 
   2 -13   2  -89.59  160.92 
  -3  13  -2    2.97    3.51 
  -3  13  -2   44.18   25.76 
   3 -13   2    3.18   25.81 
  -4  13  -2   -4.75    4.30 
  -4  13  -2  -22.16   24.89 
   4 -13   2   -4.57   38.25 
  -5  13  -2   -2.90   41.24 
  -5  13  -2   69.67   10.55 
   5 -13   2  133.09   50.31 
 -10 -12   2   12.78    6.88 
   9  12  -2    0.49   13.41 
  -9 -12   2    4.69    4.50 
   8  12  -2   41.15   17.10 
  -8 -12   2   27.54   13.81 
  -8 -12   2   26.23   10.97 
  -8 -12   2   74.43   79.78 
   7  12  -2   73.78   17.38 
   7  12  -2   45.26   14.68 
  -7 -12   2   67.54   11.78 
  -7 -12   2   66.23    5.93 
  -7 -12   2   39.56   16.78 
  -7 -12   2   43.65   21.33 
  -7 -12   2  114.22   85.33 
   6  12  -2   53.38   19.51 
   6  12  -2   38.79   12.82 
  -6 -12   2   32.79   23.28 
  -6 -12   2   31.80    6.01 
  -6 -12   2   52.87   11.30 
  -6 -12   2   35.08   15.50 
   6  12  -2   27.67   76.47 
  -6 -12   2   95.69   63.52 
  -6 -12   2 -103.43  176.35 
   5  12  -2   43.86   17.75 
   5  12  -2   37.68   14.96 
  -5 -12   2   44.76   21.55 
  -5 -12   2   55.72   19.79 
  -5 -12   2   31.43    2.58 
  -5 -12   2   36.74    5.70 
  -5 -12   2   23.18   10.20 
   5  12  -2   14.32   58.61 
  -5 -12   2  -96.05   87.29 
   4  12  -2   44.98   16.20 
   4  12  -2   35.51   13.78 
   4  12  -2   26.45    4.38 
  -4 -12   2   39.29   17.21 
  -4 -12   2   11.40    7.13 
  -4 -12   2   51.09   21.04 
  -4 -12   2   34.36    2.47 
  -4 -12   2   35.30    5.28 
   4  12  -2   98.32   88.67 
  -4 -12   2   80.24   69.47 
   3  12  -2  148.88   22.49 
   3  12  -2  154.07   23.44 
   3  12  -2  126.48   11.86 
  -3 -12   2  149.65   26.87 
  -3 -12   2  156.41   23.50 
  -3 -12   2  115.00    8.61 
   3  12  -2  154.55   68.95 
  -3 -12   2   68.71  103.26 
   2  12  -2  654.32   50.32 
   2  12  -2  660.56   55.39 
  -2 -12   2  715.79   60.55 
  -2 -12   2  675.57   37.44 
  -2 -12   2  750.02   61.76 
   2  12  -2  677.57  135.81 
  -2 -12   2  851.49  131.93 
   1  12  -2  303.11   32.31 
   1  12  -2  243.67   27.43 
  -1 -12   2  238.20   34.20 
  -1 -12   2  242.06   31.01 
   1  12  -2  276.89   87.53 
  -1 -12   2  343.68  103.93 
   0  12  -2  146.60   30.59 
   0  12  -2   97.67   20.04 
   0 -12   2   98.58   34.88 
   0 -12   2  125.58   25.39 
   0  12  -2   49.72   98.14 
   0 -12   2  107.75   93.31 
  -1  12  -2  100.34   27.04 
  -1  12  -2  158.67   27.90 
   1 -12   2  228.20   33.26 
  -1  12  -2   27.04   72.46 
   1 -12   2  -57.08  139.39 
  -2  12  -2  -12.80   32.07 
   2 -12   2  -17.60   31.35 
  -2  12  -2   89.01  118.84 
   2 -12   2  142.05  117.16 
  -3  12  -2   33.07   23.71 
  -3  12  -2   14.72    3.81 
   3 -12   2    6.00   22.89 
   3 -12   2  -12.72  113.14 
  -4  12  -2  158.00   39.23 
  -4  12  -2  133.06    9.74 
   4 -12   2  198.85   42.92 
   4 -12   2   60.77  169.13 
  -5  12  -2  119.99   42.18 
  -5  12  -2  135.48   12.53 
   5 -12   2  133.73   34.35 
  -6  12  -2   13.50    7.01 
  -6  12  -2    4.63   41.16 
   6 -12   2  -43.94   41.91 
  10  11  -2   -1.24    7.07 
 -10 -11   2    2.23    4.34 
   9  11  -2    8.90   13.83 
  -9 -11   2    0.00    4.00 
  -9 -11   2   -3.46   55.71 
   8  11  -2   41.78   15.00 
   8  11  -2   29.57   12.35 
  -8 -11   2   26.25   10.76 
  -8 -11   2   19.00   15.58 
  -8 -11   2   39.97    5.01 
  -8 -11   2  -62.82   60.02 
   7  11  -2  305.99   38.81 
   7  11  -2  293.90   25.04 
  -7 -11   2  282.69   28.73 
  -7 -11   2  320.56   31.61 
  -7 -11   2  285.00   22.83 
  -7 -11   2  303.02   18.91 
  -7 -11   2  184.43   76.55 
  -7 -11   2  145.49  277.04 
   6  11  -2  169.81   19.01 
   6  11  -2  195.59   24.16 
   6  11  -2  163.82   15.23 
  -6 -11   2  138.51   20.01 
  -6 -11   2  166.85   27.76 
  -6 -11   2  182.14   16.58 
  -6 -11   2  184.53   12.07 
   6  11  -2  -38.63   45.91 
  -6 -11   2  242.44   63.86 
  -6 -11   2  -40.66  221.64 
   5  11  -2  230.69   25.35 
   5  11  -2  238.52   18.04 
   5  11  -2  237.89   29.44 
  -5 -11   2  191.47   26.81 
  -5 -11   2  239.09   16.07 
  -5 -11   2  252.54   28.12 
  -5 -11   2  208.26   32.07 
   5  11  -2  274.05   85.77 
  -5 -11   2  116.32  139.13 
  -5 -11   2  282.92   90.46 
   4  11  -2   49.50    5.68 
   4  11  -2   35.95   12.99 
   4  11  -2   36.57   14.20 
  -4 -11   2   31.36    8.08 
  -4 -11   2   40.86    4.40 
  -4 -11   2   58.87   18.50 
  -4 -11   2   44.62   15.47 
  -4 -11   2   42.54    2.88 
   4  11  -2   57.66   53.21 
  -4 -11   2  -16.03   56.26 
   3  11  -2    5.32    3.10 
   3  11  -2   41.53   13.66 
   3  11  -2    6.96   18.37 
  -3 -11   2   12.18   13.99 
  -3 -11   2   11.94   23.48 
  -3 -11   2   -0.16    4.04 
  -3 -11   2    9.13    0.96 
   3  11  -2    0.00   67.83 
  -3 -11   2   11.10   58.43 
   2  11  -2   27.70   20.92 
   2  11  -2   35.22   13.24 
  -2 -11   2   24.09   24.84 
  -2 -11   2   37.65   16.58 
   2  11  -2   47.35   76.16 
  -2 -11   2   25.45   64.27 
   1  11  -2  233.05   27.18 
   1  11  -2  210.52   24.16 
  -1 -11   2  217.64   30.23 
  -1 -11   2  211.82   27.00 
   1  11  -2  286.21   71.86 
  -1 -11   2  108.02  104.11 
   0  11  -2   71.10   21.20 
   0  11  -2   63.88   26.35 
   0 -11   2   70.48   28.75 
   0 -11   2   64.69   25.10 
   0  11  -2   96.51   88.93 
   0 -11   2   92.72  112.38 
  -1  11  -2   22.35   18.83 
  -1  11  -2   39.78   23.63 
   1 -11   2   18.97   19.28 
   1 -11   2   25.01   18.40 
  -1  11  -2  -13.63   67.75 
   1 -11   2  -84.51   81.68 
  -2  11  -2  354.48   36.71 
  -2  11  -2  268.01   33.56 
  -2  11  -2  308.64   18.56 
   2 -11   2  347.36   37.30 
   2 -11   2  292.78   36.87 
  -2  11  -2  121.26   83.44 
   2 -11   2   69.30   97.12 
  -3  11  -2  370.88   42.70 
  -3  11  -2  297.91   41.54 
  -3  11  -2  273.54   18.43 
   3 -11   2  291.57   43.82 
   3 -11   2  265.67   42.57 
  -3  11  -2   78.25  120.63 
   3 -11   2  151.67  151.11 
  -4  11  -2  318.10   20.10 
  -4  11  -2  365.72   40.22 
   4 -11   2  338.43   42.07 
  -4  11  -2  107.41   85.80 
   4 -11   2  -28.99  106.61 
  -5  11  -2  309.57   24.20 
  -5  11  -2  309.80   40.53 
   5 -11   2  336.10   43.56 
   5 -11   2  195.41  129.98 
  -6  11  -2  250.06   21.35 
  -6  11  -2  326.47   42.53 
   6 -11   2  239.60   40.95 
  -7  11  -2    1.86    7.25 
  -7  11  -2  -23.81   40.21 
   7 -11   2  -13.38   42.04 
 -11 -10   2   58.75    8.18 
 -10 -10   2   44.09   24.22 
   9  10  -2    1.74    8.08 
  -9 -10   2   -0.50   11.71 
  -9 -10   2   -0.07    5.06 
  -9 -10   2   50.60   50.69 
   8  10  -2   50.40   14.59 
   8  10  -2   24.97   10.27 
  -8 -10   2   59.09   17.68 
  -8 -10   2   30.58   10.81 
  -8 -10   2   44.29   13.47 
  -8 -10   2   24.91   51.58 
  -8 -10   2   20.21   48.13 
   7  10  -2  149.88   21.38 
   7  10  -2  122.80   16.21 
   7  10  -2  121.93   10.83 
  -7 -10   2  136.28   19.01 
  -7 -10   2  150.63   26.63 
  -7 -10   2  150.12    9.87 
  -7 -10   2  134.67   20.11 
  -7 -10   2   96.01   48.16 
  -7 -10   2   16.93  234.47 
  -7 -10   2  184.93   63.61 
   6  10  -2    0.64    4.50 
   6  10  -2  -12.63   11.56 
   6  10  -2   -3.72   13.97 
  -6 -10   2    0.78    3.17 
  -6 -10   2    0.65    8.78 
  -6 -10   2   -1.73   17.06 
  -6 -10   2   12.22   14.59 
  -6 -10   2  -74.93  185.50 
  -6 -10   2  -33.53   58.43 
   5  10  -2   12.20    3.38 
   5  10  -2   -1.80   14.61 
   5  10  -2   15.44    9.69 
  -5 -10   2   14.12    3.37 
  -5 -10   2    3.77   15.13 
  -5 -10   2   13.10    9.02 
  -5 -10   2    5.84   18.07 
   5  10  -2  -70.14   57.38 
  -5 -10   2   18.90   44.19 
  -5 -10   2  219.84  177.54 
   4  10  -2  127.25   15.90 
   4  10  -2   94.02    6.67 
   4  10  -2  103.36   16.25 
  -4 -10   2   71.70   22.43 
  -4 -10   2  112.70   16.95 
  -4 -10   2   69.96   11.92 
  -4 -10   2   89.03    6.71 
   4  10  -2  -39.15   60.33 
  -4 -10   2   83.41   51.17 
   3  10  -2  187.76   19.80 
   3  10  -2  188.33   20.97 
   3  10  -2  153.33   11.71 
  -3 -10   2  159.52    9.15 
  -3 -10   2  156.41    9.12 
  -3 -10   2  143.63   20.27 
  -3 -10   2  189.95   24.13 
   3  10  -2  224.95   56.94 
  -3 -10   2  208.14   64.99 
   2  10  -2  200.33   23.10 
   2  10  -2  159.12   20.03 
  -2 -10   2  221.65   25.73 
  -2 -10   2  162.99   21.99 
   2  10  -2  160.53   55.42 
  -2 -10   2  112.67   59.80 
   1  10  -2  685.23   68.36 
   1  10  -2  802.59   65.03 
  -1 -10   2  681.85   58.79 
  -1 -10   2  786.62   56.77 
   1  10  -2  794.94  107.55 
  -1 -10   2  664.76  127.64 
   0  10  -2  397.32   34.76 
   0  10  -2  299.62   29.94 
   0 -10   2  339.40   33.12 
   0 -10   2  399.65   50.08 
   0  10  -2  338.34   78.71 
   0 -10   2  317.21   88.41 
  -1  10  -2    1.32   12.88 
  -1  10  -2    5.08   15.55 
  -1  10  -2   29.28    3.00 
   1 -10   2   20.67   18.29 
   1 -10   2   39.08   17.74 
  -1  10  -2   53.15   64.29 
   1 -10   2   90.60   75.35 
  -2  10  -2    0.53    2.74 
  -2  10  -2  -43.99   22.74 
   2 -10   2   19.43   24.59 
   2 -10   2   -1.51   27.77 
  -2  10  -2  -17.31   41.86 
  -2  10  -2  -20.07   98.63 
   2 -10   2   74.71  115.29 
  -3  10  -2  333.71   36.52 
  -3  10  -2  240.33   33.68 
  -3  10  -2  340.28   19.45 
   3 -10   2  423.14   39.21 
   3 -10   2  383.79   39.44 
  -3  10  -2  132.97   57.69 
  -3  10  -2  343.31   96.09 
   3 -10   2  247.82  101.91 
  -4  10  -2  -15.63   28.26 
  -4  10  -2   10.84    4.55 
  -4  10  -2   21.95   21.01 
   4 -10   2   49.17   22.74 
   4 -10   2   24.71   31.20 
  -4  10  -2  -12.53   47.30 
  -4  10  -2  -97.13  117.44 
   4 -10   2   93.00  101.94 
  -5  10  -2   37.33   32.76 
   5 -10   2   23.81   32.92 
   5 -10   2   35.09   25.04 
  -5  10  -2 -215.03  132.31 
   5 -10   2   28.58  111.20 
  -6  10  -2   52.51    5.96 
  -6  10  -2   16.88   25.42 
   6 -10   2   94.48   29.71 
   6 -10   2   47.04    4.08 
   6 -10   2  131.04  166.46 
  -7  10  -2   43.27   28.98 
  -7  10  -2   31.10    7.61 
   7 -10   2  109.19   32.99 
   7 -10   2   86.66  188.94 
  -8  10  -2  253.03   44.29 
  -8  10  -2  197.36   17.31 
   8 -10   2  177.55   50.25 
   8 -10   2  280.56   34.89 
 -11  -9   2   54.19    6.28 
 -10  -9   2  189.45   15.27 
   9   9  -2  110.85   13.94 
   9   9  -2   77.14   13.39 
  -9  -9   2   87.45   12.82 
  -9  -9   2  113.21    8.24 
  -9  -9   2   19.93   38.86 
   8   9  -2   16.50    7.96 
   8   9  -2   24.15    9.75 
  -8  -9   2   35.47   10.93 
  -8  -9   2   27.48   10.57 
  -8  -9   2   42.83    5.53 
  -8  -9   2   29.90   10.28 
  -8  -9   2   94.60   46.32 
  -8  -9   2  -32.52   41.42 
  -8  -9   2   14.41  180.82 
   7   9  -2  326.45   24.67 
   7   9  -2  316.83   33.41 
   7   9  -2  364.33   43.97 
  -7  -9   2  346.17   30.83 
  -7  -9   2  283.86   37.31 
  -7  -9   2  364.29   18.15 
  -7  -9   2  316.66   24.48 
  -7  -9   2  342.35   56.91 
  -7  -9   2  235.96  211.30 
  -7  -9   2  215.73   61.90 
   6   9  -2    6.03    2.98 
   6   9  -2    4.30    9.99 
   6   9  -2    5.53   11.79 
  -6  -9   2   -7.39   13.56 
  -6  -9   2   25.60   12.74 
  -6  -9   2   12.78    8.44 
  -6  -9   2    1.06    2.94 
  -6  -9   2   69.66   53.18 
  -6  -9   2  -72.39  121.06 
   5   9  -2  395.10   28.44 
   5   9  -2  414.38   35.52 
   5   9  -2  366.33   32.43 
  -5  -9   2  364.34   29.42 
  -5  -9   2  344.01   31.59 
  -5  -9   2  382.44   20.11 
   5   9  -2  237.20   62.16 
  -5  -9   2  374.14   61.31 
  -5  -9   2  328.15  132.76 
   4   9  -2  117.24   18.72 
   4   9  -2  133.35    8.75 
   4   9  -2  169.18   16.80 
  -4  -9   2  207.99   24.44 
  -4  -9   2  148.65   14.32 
  -4  -9   2  149.90    8.48 
  -4  -9   2  134.18   17.42 
   4   9  -2  119.99   57.82 
  -4  -9   2   62.99  105.82 
  -4  -9   2  231.47   50.87 
   3   9  -2   19.53   11.08 
   3   9  -2   -1.01    9.24 
   3   9  -2    0.76    2.53 
  -3  -9   2  -11.60   12.38 
  -3  -9   2    4.85    3.92 
  -3  -9   2    8.17   10.68 
  -3  -9   2   -1.21    1.02 
   3   9  -2    8.18   37.09 
  -3  -9   2   15.28   41.55 
   2   9  -2   15.94   12.45 
   2   9  -2   -7.28   13.90 
  -2  -9   2    7.43   14.31 
  -2  -9   2  -10.39   15.93 
   2   9  -2  -24.64   39.80 
  -2  -9   2   27.17   65.53 
   1   9  -2  136.17   17.39 
   1   9  -2  118.04   19.00 
  -1  -9   2  132.22   21.39 
  -1  -9   2  120.34   19.05 
   1   9  -2  100.45   48.17 
  -1  -9   2  107.90   55.60 
   0   9  -2   49.18   17.25 
   0   9  -2   53.16   15.92 
   0  -9   2   13.89   14.31 
   0  -9   2   48.91   17.50 
   0   9  -2   25.00   51.63 
   0  -9   2   17.54   79.15 
  -1   9  -2  413.47   21.22 
  -1   9  -2  357.92   55.38 
  -1   9  -2  476.07   39.88 
   1  -9   2  331.44   38.92 
   1  -9   2  402.80   40.88 
  -1   9  -2  552.33  103.54 
  -1   9  -2  288.04   78.73 
   1  -9   2  352.95  109.92 
  -2   9  -2  273.63   27.23 
  -2   9  -2  244.07   29.19 
  -2   9  -2  295.17   16.69 
   2  -9   2  233.65   32.91 
   2  -9   2  218.70   28.43 
  -2   9  -2  131.48   66.25 
  -2   9  -2  259.89   75.33 
   2  -9   2   42.71  102.92 
  -3   9  -2   70.56    5.78 
  -3   9  -2   95.35   27.14 
  -3   9  -2   86.41   20.39 
   3  -9   2  101.07   27.93 
   3  -9   2   76.32   20.87 
  -3   9  -2  -76.99  101.45 
   3  -9   2   22.59   74.67 
  -4   9  -2  540.46   47.71 
  -4   9  -2  561.49   31.27 
  -4   9  -2  589.66   49.35 
   4  -9   2  530.12   50.73 
   4  -9   2  545.48   47.97 
  -4   9  -2  365.39  102.66 
   4  -9   2  212.35  101.86 
  -5   9  -2   21.41   20.73 
   5  -9   2   28.90   20.89 
   5  -9   2    3.05   19.70 
  -5   9  -2  -22.12   86.55 
   5  -9   2   24.77  100.86 
  -6   9  -2   62.49   33.12 
  -6   9  -2   41.95    6.83 
   6  -9   2   46.69    3.47 
   6  -9   2  -10.00   21.50 
   6  -9   2   54.51   24.90 
  -6   9  -2  106.81  141.47 
   6  -9   2   72.94  101.75 
  -7   9  -2    7.35    6.67 
  -7   9  -2   14.73   25.23 
   7  -9   2    9.53   24.28 
   7  -9   2   20.13  107.56 
  -8   9  -2   -0.42    7.87 
  -8   9  -2  -20.67   39.36 
   8  -9   2   12.77   37.04 
   8  -9   2    9.35   15.85 
   8  -9   2  -52.88  139.12 
 -11  -8   2   63.18    7.65 
 -10  -8   2   -5.24    5.22 
   9   8  -2  196.36   23.98 
   9   8  -2  178.23   16.00 
  -9  -8   2  149.25   20.12 
  -9  -8   2  211.17   12.16 
  -9  -8   2  155.15   16.09 
  -9  -8   2  194.63   44.37 
  -9  -8   2  151.23   33.70 
   8   8  -2   35.30    8.53 
   8   8  -2   21.85    9.06 
  -8  -8   2   19.61    9.60 
  -8  -8   2   19.51    8.09 
  -8  -8   2   14.72    3.52 
  -8  -8   2    9.66    9.12 
  -8  -8   2   76.46   41.33 
  -8  -8   2 -151.86  155.31 
  -8  -8   2  -13.87   44.24 
   7   8  -2   60.00   12.44 
  -7  -8   2   57.91    4.82 
  -7  -8   2   57.54   13.95 
  -7  -8   2   44.65   11.91 
  -7  -8   2   55.15   10.40 
  -7  -8   2   84.60   37.74 
  -7  -8   2   87.14  196.81 
  -7  -8   2   99.63   40.93 
   6   8  -2   40.83   11.30 
   6   8  -2   34.42    4.62 
  -6  -8   2   32.25    9.11 
  -6  -8   2   38.11   11.09 
  -6  -8   2   38.27   12.68 
  -6  -8   2   35.37    4.70 
  -6  -8   2   25.37   40.47 
  -6  -8   2  165.88  171.29 
   5   8  -2  641.38   48.72 
   5   8  -2  634.56   51.84 
   5   8  -2  547.20   51.65 
  -5  -8   2  635.70   32.01 
  -5  -8   2  640.46   43.10 
  -5  -8   2  687.38   48.20 
  -5  -8   2  634.04   44.65 
   5   8  -2  617.25   90.15 
  -5  -8   2  720.18  195.15 
  -5  -8   2  537.15   82.96 
   4   8  -2 1487.33   94.86 
   4   8  -2 1499.54  135.76 
   4   8  -2 1554.72   92.82 
  -4  -8   2 1577.83   72.04 
  -4  -8   2 1487.87  110.10 
  -4  -8   2 1637.36   97.76 
  -4  -8   2 1427.90  105.25 
   4   8  -2 1412.83  194.41 
  -4  -8   2 1653.40  174.54 
  -4  -8   2 1432.85  251.48 
   3   8  -2 2629.22  183.67 
   3   8  -2 2510.97  177.09 
   3   8  -2 2841.36  153.90 
  -3  -8   2 2722.34  171.57 
  -3  -8   2 2733.78  129.21 
  -3  -8   2 2725.77  166.11 
   3   8  -2 2741.03  281.52 
  -3  -8   2 2589.99  270.24 
  -3  -8   2 2114.10  348.63 
   2   8  -2 1842.16  118.11 
   2   8  -2 1845.50  135.12 
  -2  -8   2 1696.64   95.85 
  -2  -8   2 1822.74  149.37 
  -2  -8   2 1903.11  118.75 
   2   8  -2 1592.27  191.57 
  -2  -8   2 1643.24  182.33 
   1   8  -2  280.36   27.63 
   1   8  -2  318.35   30.18 
  -1  -8   2  383.16   31.98 
  -1  -8   2  336.34   29.58 
   1   8  -2  297.46   63.14 
  -1  -8   2  552.83   85.94 
   0   8  -2   18.39   14.98 
   0   8  -2    8.17   16.96 
   0  -8   2   19.93   17.67 
   0  -8   2   24.26   20.76 
   0   8  -2   44.64   57.54 
   0   8  -2   -8.65   59.93 
   0  -8   2   -4.66   69.36 
  -1   8  -2  108.03    6.48 
  -1   8  -2  156.37   18.01 
  -1   8  -2   97.02   18.58 
   1  -8   2  118.44   18.89 
   1  -8   2   88.66   19.31 
  -1   8  -2   22.82   65.01 
  -1   8  -2  114.75   54.79 
   1  -8   2   87.36   82.59 
  -2   8  -2  118.59   17.80 
  -2   8  -2   86.86   23.66 
  -2   8  -2  114.42    6.85 
   2  -8   2   86.14   18.87 
   2  -8   2   74.60   23.98 
  -2   8  -2   17.25   55.10 
   2  -8   2   59.20   63.88 
  -3   8  -2  195.21   26.07 
  -3   8  -2  250.15   13.57 
  -3   8  -2  184.92   25.74 
   3  -8   2  240.59   28.11 
   3  -8   2  178.11   26.11 
  -3   8  -2  180.73   71.43 
   3  -8   2   93.15   70.90 
  -4   8  -2  300.37   36.28 
  -4   8  -2  308.55   17.61 
  -4   8  -2  311.10   33.12 
   4  -8   2  271.14   36.35 
  -4   8  -2  -45.80   92.93 
   4  -8   2  235.59   86.96 
  -5   8  -2  292.91   39.62 
  -5   8  -2  159.42   12.09 
  -5   8  -2  186.11   28.35 
   5  -8   2  187.80   28.08 
   5  -8   2  184.12   33.60 
  -5   8  -2  305.82  122.38 
   5  -8   2  124.89   96.03 
  -6   8  -2  164.20   12.24 
  -6   8  -2  204.81   30.05 
   6  -8   2  102.70   25.66 
   6  -8   2  191.87   29.28 
   6  -8   2  157.44    9.80 
  -6   8  -2  135.29   83.36 
   6  -8   2  155.65  100.29 
  -7   8  -2   44.91   24.52 
  -7   8  -2   52.14    7.61 
   7  -8   2   48.23   23.97 
   7  -8   2   24.31   23.16 
   7  -8   2   50.76    4.40 
   7  -8   2  -10.93   94.28 
  -8   8  -2   71.99   27.99 
  -8   8  -2   44.47    8.56 
   8  -8   2   17.57   25.97 
   8  -8   2   66.76   13.34 
   8  -8   2   46.15   24.78 
   8  -8   2 -114.40  129.93 
  -9   8  -2   68.22   34.16 
  -9   8  -2   77.50    8.86 
   9  -8   2   58.62   15.28 
   9  -8   2   40.91   27.11 
 -11  -7   2   16.49    5.42 
 -10  -7   2   77.46    7.09 
   9   7  -2    8.49    3.04 
  -9  -7   2    9.99    3.81 
  -9  -7   2   13.78    3.41 
  -9  -7   2    7.20    3.14 
  -9  -7   2    9.72   16.38 
  -9  -7   2   17.21   16.82 
   8   7  -2   26.62    6.35 
   8   7  -2   28.06    7.52 
  -8  -7   2   17.39    9.08 
  -8  -7   2   18.55    3.43 
  -8  -7   2    4.96    7.77 
  -8  -7   2   16.49    6.72 
  -8  -7   2    0.00   34.53 
  -8  -7   2  -36.16  203.08 
  -8  -7   2   -7.88   32.56 
   7   7  -2  193.02   18.73 
  -7  -7   2  164.54   16.24 
  -7  -7   2  177.72   20.16 
  -7  -7   2  211.34   10.56 
  -7  -7   2  200.43   16.42 
  -7  -7   2  158.55   36.22 
  -7  -7   2  143.02   39.16 
  -7  -7   2  101.87  185.99 
   6   7  -2   97.35    6.71 
   6   7  -2  108.38   12.53 
   6   7  -2   71.04   10.28 
  -6  -7   2  115.56   13.76 
  -6  -7   2   90.58   11.61 
  -6  -7   2  111.20    6.96 
  -6  -7   2  111.13   11.93 
  -6  -7   2  155.32   42.70 
  -6  -7   2  101.18   33.27 
  -6  -7   2   32.91  155.25 
   5   7  -2   23.51    8.52 
   5   7  -2   12.29    9.98 
  -5  -7   2   10.65   11.63 
  -5  -7   2   -3.58    5.33 
  -5  -7   2   -8.31    8.39 
  -5  -7   2   -2.73    3.56 
  -5  -7   2   -1.50   32.49 
  -5  -7   2 -133.99  132.08 
   4   7  -2  474.70   29.92 
   4   7  -2  468.50   32.70 
   4   7  -2  444.09   39.09 
  -4  -7   2  461.84   22.68 
  -4  -7   2  462.53   36.88 
  -4  -7   2  458.12   34.14 
  -4  -7   2  489.90   33.15 
   4   7  -2  360.95   58.41 
  -4  -7   2  409.08   62.79 
  -4  -7   2  337.28  105.50 
   3   7  -2  126.20   17.53 
   3   7  -2  166.02    8.96 
   3   7  -2  177.66   18.00 
  -3  -7   2  147.00    8.54 
  -3  -7   2  182.09   18.59 
  -3  -7   2  126.73   20.46 
   3   7  -2  218.16   47.23 
  -3  -7   2  152.45  115.72 
  -3  -7   2  208.87   50.81 
   2   7  -2 1146.93   77.56 
   2   7  -2 1151.24   73.46 
  -2  -7   2 1191.32   61.27 
  -2  -7   2 1132.57   73.73 
  -2  -7   2 1184.91   74.61 
   2   7  -2 1228.13  135.07 
  -2  -7   2 1198.49  138.37 
   1   7  -2   17.06    9.34 
   1   7  -2   -2.31    9.87 
  -1  -7   2   43.01   11.89 
  -1  -7   2   17.42   11.82 
   1   7  -2    8.14   31.76 
  -1  -7   2    8.55   38.45 
   0   7  -2 1058.77   68.38 
   0   7  -2 1045.67   71.14 
   0  -7   2  918.81   72.83 
   0  -7   2 1172.39   69.91 
   0   7  -2  994.57  138.68 
   0   7  -2 1072.92  120.66 
   0  -7   2  851.45  119.63 
  -1   7  -2  147.88    8.88 
  -1   7  -2  191.41   20.59 
  -1   7  -2  126.21   17.10 
   1  -7   2  132.43   19.10 
   1  -7   2  176.49   21.07 
  -1   7  -2  103.47   60.86 
  -1   7  -2   97.35   46.66 
   1  -7   2  160.80   75.59 
  -2   7  -2   -0.44   11.52 
  -2   7  -2    2.27    2.42 
   2  -7   2    1.43   13.94 
   2  -7   2   10.02   18.58 
  -2   7  -2   55.79   50.58 
   2  -7   2   54.04   77.68 
  -3   7  -2  194.31   11.64 
  -3   7  -2  209.12   24.26 
  -3   7  -2  202.96   27.40 
   3  -7   2  153.95   26.80 
   3  -7   2  186.67   24.30 
  -3   7  -2  263.42   69.08 
   3  -7   2  130.72   94.27 
  -4   7  -2 1022.40  103.27 
  -4   7  -2 1088.83   58.37 
  -4   7  -2 1118.99   74.59 
   4  -7   2 1175.57   75.42 
   4  -7   2  959.58   87.26 
  -4   7  -2 1297.48  164.72 
   4  -7   2 1066.32  174.66 
  -5   7  -2   23.65   24.54 
  -5   7  -2   53.44   19.79 
  -5   7  -2   78.65    6.51 
   5  -7   2   68.45   20.31 
   5  -7   2   60.46   25.37 
  -5   7  -2   98.03   77.95 
   5  -7   2  192.84  114.97 
  -6   7  -2  186.64   12.08 
  -6   7  -2  160.75   26.94 
  -6   7  -2  137.79   32.52 
   6  -7   2  118.90   24.87 
   6  -7   2  164.49    8.78 
   6  -7   2  111.15   30.48 
  -6   7  -2   86.45   83.90 
   6  -7   2   60.16  117.70 
  -7   7  -2  488.78   49.95 
  -7   7  -2  500.30   34.45 
   7  -7   2  555.70   61.19 
   7  -7   2  475.65   56.09 
   7  -7   2  477.99   31.94 
   7  -7   2  475.78  152.48 
  -8   7  -2   47.47    6.52 
  -8   7  -2   41.43   32.34 
   8  -7   2   42.63    3.94 
   8  -7   2   58.18   12.28 
   8  -7   2   34.15   30.50 
   8  -7   2   78.22   25.36 
   8  -7   2   61.43  154.87 
  -9   7  -2   25.24   36.79 
  -9   7  -2   -0.29    7.97 
   9  -7   2    2.71   11.36 
   9  -7   2  -47.02   31.71 
 -11  -6   2   57.51    6.14 
 -11  -6   2   36.25    5.57 
 -10  -6   2   44.27    5.19 
 -10  -6   2   35.07    5.40 
  -9  -6   2  326.29   21.05 
  -9  -6   2  363.94   22.97 
  -9  -6   2   72.24  183.31 
   8   6  -2    9.69    5.83 
   8   6  -2    0.49    5.41 
  -8  -6   2    7.06    4.73 
  -8  -6   2    9.34    4.20 
  -8  -6   2    4.11    3.73 
  -8  -6   2    3.76    6.66 
  -8  -6   2  240.68  202.92 
   7   6  -2  200.12   18.73 
   7   6  -2  177.96   17.37 
  -7  -6   2  203.77   11.47 
  -7  -6   2  162.73   15.13 
  -7  -6   2  202.64   11.79 
  -7  -6   2  180.12   16.61 
  -7  -6   2  187.81   18.95 
  -7  -6   2  146.86   37.29 
  -7  -6   2  239.38  172.35 
  -7  -6   2  176.46   32.41 
   6   6  -2  610.03   61.67 
  -6  -6   2  652.69   44.08 
  -6  -6   2  649.05   44.26 
  -6  -6   2  685.95   54.56 
  -6  -6   2  702.87   33.77 
  -6  -6   2  612.07  176.69 
  -6  -6   2  529.85   70.54 
  -6  -6   2  611.66   71.89 
   5   6  -2  189.14   16.15 
   5   6  -2  202.42   13.48 
   5   6  -2  208.78   19.40 
  -5  -6   2  235.24   18.21 
  -5  -6   2  216.48   10.52 
  -5  -6   2  220.23   16.89 
  -5  -6   2  207.19   19.07 
  -5  -6   2  395.04  132.10 
  -5  -6   2  179.68   36.56 
   4   6  -2  353.56   26.73 
   4   6  -2  382.35   26.01 
   4   6  -2  396.26   28.19 
  -4  -6   2  380.17   27.18 
  -4  -6   2  387.07   27.42 
  -4  -6   2  350.83   17.87 
  -4  -6   2  388.02   26.41 
   4   6  -2  313.06   48.44 
  -4  -6   2  436.41  120.40 
  -4  -6   2  362.75   51.20 
   3   6  -2 2104.13  142.22 
   3   6  -2 2027.46  168.36 
   3   6  -2 2085.19  117.93 
  -3  -6   2 2081.67  135.44 
  -3  -6   2 2129.86  104.09 
  -3  -6   2 2121.05  129.56 
   3   6  -2 1855.45  205.06 
  -3  -6   2 2254.62  268.51 
  -3  -6   2 1954.37  218.57 
   2   6  -2 2043.70  134.97 
   2   6  -2 2197.23  138.31 
   2   6  -2 2037.18  158.65 
  -2  -6   2 2091.81  129.72 
  -2  -6   2 2221.74  166.45 
   2   6  -2 1833.62  198.36 
  -2  -6   2 1937.46  201.18 
   1   6  -2   22.79    9.89 
   1   6  -2   25.91    8.83 
  -1  -6   2   41.99   12.05 
  -1  -6   2   25.11    9.88 
   1   6  -2   65.30   57.47 
   1   6  -2   81.54   30.15 
  -1  -6   2   -7.47   29.45 
   0   6  -2   26.19   10.17 
   0   6  -2   15.21   14.72 
   0   6  -2    1.94    0.86 
   0  -6   2  -13.49   15.05 
   0  -6   2  -14.16   13.71 
   0   6  -2   19.12   46.52 
   0   6  -2  -49.18   54.10 
   0  -6   2    3.05   51.14 
  -1   6  -2  707.61   51.12 
  -1   6  -2  685.96   34.66 
  -1   6  -2  514.26   62.90 
   1  -6   2  657.73   48.27 
   1  -6   2  707.16   54.87 
  -1   6  -2  776.82  111.91 
   1  -6   2  750.32  113.29 
  -2   6  -2  220.29   23.88 
  -2   6  -2  271.88   24.13 
  -2   6  -2  249.75   12.48 
   2  -6   2  222.54   24.47 
   2  -6   2  249.52   24.48 
  -2   6  -2  333.24   64.13 
   2  -6   2  224.87   63.11 
  -3   6  -2    9.99   12.03 
  -3   6  -2   28.25   19.21 
   3  -6   2    0.42   12.54 
   3  -6   2   -1.87   11.92 
  -3   6  -2   47.88   48.99 
   3  -6   2  -65.46   55.89 
  -4   6  -2    5.76   13.50 
  -4   6  -2    8.86   14.12 
   4  -6   2    5.03   13.74 
   4  -6   2   -3.08   13.37 
  -4   6  -2   22.81   54.61 
   4  -6   2  110.08   66.14 
  -5   6  -2    1.47   15.57 
  -5   6  -2   29.64   17.42 
   5  -6   2   52.91  114.22 
   5  -6   2   -2.42   14.77 
   5  -6   2   41.92    2.99 
  -5   6  -2   43.53   67.54 
   5  -6   2  -24.51   67.55 
  -6   6  -2   95.05   28.64 
  -6   6  -2  139.46   29.85 
   6  -6   2  131.60   28.24 
   6  -6   2  122.74    6.42 
   6  -6   2   73.10   26.67 
  -6   6  -2   38.06  110.68 
   6  -6   2   19.50  106.83 
  -7   6  -2  279.70   32.81 
  -7   6  -2  231.17   38.84 
   7  -6   2  214.47   14.68 
   7  -6   2  198.05   29.02 
   7  -6   2  214.83   35.23 
  -7   6  -2  217.60   93.11 
   7  -6   2   97.73  125.79 
  -8   6  -2   90.75   25.36 
   8  -6   2   94.61   23.51 
   8  -6   2   34.31   29.49 
   8  -6   2   78.66   12.76 
   8  -6   2   66.21    4.84 
   8  -6   2  168.57  135.11 
  -9   6  -2   12.35   21.26 
   9  -6   2  -12.22   21.31 
   9  -6   2   -5.79    5.47 
   9  -6   2   10.59   15.76 
   9  -6   2   -4.58   32.67 
 -10   6  -2   71.92   11.19 
  10  -6   2   46.47   25.80 
  10  -6   2   31.70   19.55 
  12   5  -2   37.59   17.15 
 -12  -5   2   31.91    4.70 
 -12  -5   2   37.27    7.47 
  11   5  -2  -17.48   19.27 
 -11  -5   2    7.81    4.83 
 -11  -5   2    2.72    5.56 
  10   5  -2   57.69   19.55 
 -10  -5   2   71.40    6.34 
 -10  -5   2   86.48    6.65 
   9   5  -2   49.18   16.36 
   9   5  -2   34.74    4.40 
  -9  -5   2   27.13    3.93 
  -9  -5   2   28.42    3.70 
  -9  -5   2   52.37    5.68 
  -9  -5   2   42.90    4.89 
  -9  -5   2   24.27   17.93 
  -9  -5   2   39.53   13.43 
  -9  -5   2   72.46  235.50 
   8   5  -2   13.91    4.38 
   8   5  -2    7.86   13.27 
   8   5  -2   15.22    5.21 
  -8  -5   2   14.33    5.47 
  -8  -5   2   22.83    3.07 
  -8  -5   2   17.43    4.36 
  -8  -5   2    4.89    5.04 
  -8  -5   2 -142.44  124.67 
  -8  -5   2   11.10   23.67 
  -8  -5   2   -8.40   16.69 
   7   5  -2   14.41    5.71 
   7   5  -2    2.01    4.64 
   7   5  -2    8.88    8.57 
  -7  -5   2    8.34    6.62 
  -7  -5   2   14.53    3.79 
  -7  -5   2    8.13    5.94 
  -7  -5   2    8.17    3.47 
  -7  -5   2   16.75    5.25 
  -7  -5   2   76.89  156.72 
  -7  -5   2    1.38   16.09 
  -7  -5   2   43.31   28.96 
   6   5  -2   62.27    7.38 
   6   5  -2   45.02    7.51 
  -6  -5   2   59.86    8.19 
  -6  -5   2   43.14    4.38 
  -6  -5   2   60.91    9.22 
  -6  -5   2   53.12    4.99 
  -6  -5   2   52.71    7.34 
  -6  -5   2   51.37   27.02 
  -6  -5   2    0.00   19.61 
  -6  -5   2   16.33   85.80 
   5   5  -2  554.30   39.72 
  -5  -5   2  609.20   29.78 
  -5  -5   2  574.15   44.68 
  -5  -5   2  582.39   42.55 
  -5  -5   2  594.01   29.06 
  -5  -5   2  540.34   37.81 
  -5  -5   2  562.77   74.88 
  -5  -5   2  462.59  136.34 
  -5  -5   2  551.25   72.31 
   4   5  -2   38.77    3.21 
   4   5  -2   38.19    9.04 
   4   5  -2   32.72    6.22 
  -4  -5   2   36.58    8.78 
  -4  -5   2   36.41    8.31 
  -4  -5   2   36.40    3.71 
  -4  -5   2   30.22    7.14 
  -4  -5   2  168.76  101.46 
   3   5  -2  313.39   22.28 
   3   5  -2  325.44   28.09 
   3   5  -2  271.53   23.62 
  -3  -5   2  322.42   14.56 
  -3  -5   2  304.76   22.57 
  -3  -5   2  288.24   22.82 
  -3  -5   2  251.00   20.09 
   3   5  -2  280.19   42.24 
  -3  -5   2  297.54   44.42 
  -3  -5   2  573.82  104.41 
   2   5  -2  590.79   46.81 
   2   5  -2  638.04   35.49 
   2   5  -2  585.38   41.12 
  -2  -5   2  627.03   48.01 
  -2  -5   2  565.93   44.00 
   2   5  -2  626.28   73.75 
  -2  -5   2  548.71   99.15 
  -2  -5   2  548.80   71.52 
   1   5  -2  455.61   32.95 
   1   5  -2  393.27   33.53 
  -1  -5   2  367.31   40.14 
  -1  -5   2  446.06   29.85 
   1   5  -2  495.42   87.35 
   1   5  -2  428.97   65.56 
  -1  -5   2  544.00   64.17 
   0   5  -2 1050.42   71.87 
   0   5  -2 1050.03   78.26 
   0   5  -2 1016.25   56.78 
   0  -5   2 1082.54   77.52 
   0  -5   2 1070.19   68.44 
   0   5  -2 1085.91  121.99 
   0   5  -2 1022.71  136.67 
   0  -5   2  895.26  118.12 
  -1   5  -2  284.87   22.87 
  -1   5  -2  273.63   69.59 
  -1   5  -2  281.85   14.99 
   1  -5   2  284.14   24.11 
   1  -5   2  257.60   32.89 
  -1   5  -2  332.69   55.07 
   1  -5   2  245.95   57.12 
  -2   5  -2  195.40   19.81 
   2  -5   2  149.05   18.81 
   2  -5   2  164.87   21.77 
  -2   5  -2   34.07   37.06 
   2  -5   2   62.07   63.37 
  -3   5  -2   -1.69   10.94 
  -3   5  -2    3.64   11.85 
   3  -5   2   10.46   12.04 
   3  -5   2   20.71   12.04 
  -3   5  -2  -11.37   42.23 
   3  -5   2   -7.16   47.72 
  -4   5  -2   -2.97   12.29 
  -4   5  -2   12.51   12.58 
   4  -5   2   22.42   13.81 
   4  -5   2   10.04   12.77 
  -4   5  -2   13.13   50.39 
   4  -5   2  -26.27   55.29 
  -5   5  -2  713.80   50.24 
  -5   5  -2  742.12   53.16 
   5  -5   2  628.37   48.08 
   5  -5   2  587.09   32.24 
   5  -5   2  630.84   48.62 
  -5   5  -2  601.32  103.91 
   5  -5   2  543.86   98.83 
  -6   5  -2   27.38   22.82 
  -6   5  -2    8.50   22.85 
   6  -5   2  -11.46   21.10 
   6  -5   2   -6.80   21.68 
   6  -5   2    2.41    1.98 
  -6   5  -2  -20.66   96.19 
   6  -5   2   28.36   94.55 
  -7   5  -2   37.45   26.06 
  -7   5  -2    9.81   25.08 
   7  -5   2   30.38   22.64 
   7  -5   2   31.70    3.11 
   7  -5   2   70.85   25.11 
  -7   5  -2   97.33   80.05 
   7  -5   2  170.68  115.39 
  -8   5  -2   -2.59   18.72 
   8  -5   2   -0.41    2.64 
   8  -5   2   -8.08    8.36 
   8  -5   2   -1.67   38.45 
   8  -5   2   -2.88   16.27 
  -8   5  -2    1.84   85.59 
   8  -5   2  -42.88  111.96 
  -9   5  -2   83.06   32.29 
   9  -5   2  116.98   31.65 
   9  -5   2   76.09   14.02 
   9  -5   2   67.63    5.84 
   9  -5   2   71.60   31.95 
   9  -5   2   10.60  118.37 
 -10   5  -2    1.00   31.94 
  10  -5   2   24.07   18.36 
  10  -5   2    5.66   29.14 
  12   4  -2   10.40   15.95 
 -12  -4   2    0.07    6.56 
 -12  -4   2   -0.66    5.22 
  11   4  -2  180.55   26.52 
 -11  -4   2  163.89   10.77 
 -11  -4   2  191.02   16.07 
  10   4  -2  124.08   13.20 
  10   4  -2  118.81   10.99 
  10   4  -2  139.41   22.61 
 -10  -4   2  132.61   11.39 
 -10  -4   2  140.87    8.68 
 -10  -4   2   75.08   21.29 
 -10  -4   2    3.14   18.40 
   9   4  -2    9.59    6.26 
   9   4  -2    9.02    5.26 
   9   4  -2   -0.23   15.00 
  -9  -4   2    7.00    5.59 
  -9  -4   2   16.30    6.39 
  -9  -4   2   22.86    3.77 
  -9  -4   2    4.45   23.50 
  -9  -4   2   11.16   29.53 
  -9  -4   2    0.00  136.43 
   8   4  -2   31.01    5.32 
   8   4  -2   55.75   14.99 
   8   4  -2   31.03    6.94 
  -8  -4   2   15.82    5.43 
  -8  -4   2   24.11    6.11 
  -8  -4   2   17.94    4.35 
  -8  -4   2   20.16    3.93 
  -8  -4   2 -127.42  167.49 
  -8  -4   2   40.28   23.59 
  -8  -4   2   29.18   22.40 
   7   4  -2   12.01    5.22 
   7   4  -2    8.81    8.51 
  -7  -4   2    3.65    3.47 
  -7  -4   2    2.75    5.30 
  -7  -4   2    5.05    5.69 
  -7  -4   2    4.51    5.32 
  -7  -4   2    2.70    3.01 
  -7  -4   2   46.26   28.20 
  -7  -4   2   73.44  105.77 
  -7  -4   2   35.41   18.38 
   6   4  -2  144.21   15.46 
   6   4  -2  132.50   11.23 
   6   4  -2  125.89   11.49 
  -6  -4   2  110.85    7.27 
  -6  -4   2  130.09   11.63 
  -6  -4   2   99.96   11.48 
  -6  -4   2  127.23   12.15 
  -6  -4   2  122.68    6.54 
  -6  -4   2  -26.02   82.54 
  -6  -4   2   72.96   17.61 
  -6  -4   2   76.25   24.57 
   5   4  -2 1110.73   74.80 
   5   4  -2 1094.71   68.36 
   5   4  -2  933.07   65.07 
  -5  -4   2 1139.43   66.83 
  -5  -4   2 1088.43   48.59 
  -5  -4   2 1110.98   56.60 
  -5  -4   2 1083.82   66.99 
  -5  -4   2 1052.90   87.98 
  -5  -4   2 1096.01  116.95 
  -5  -4   2 1133.73  121.95 
  -5  -4   2 1064.56  178.70 
   4   4  -2 1369.00   87.30 
  -4  -4   2 1492.95   71.35 
  -4  -4   2 1468.55   94.63 
  -4  -4   2 1324.80   75.32 
  -4  -4   2 1362.41   87.85 
  -4  -4   2 1367.26   89.85 
  -4  -4   2 1258.10  161.99 
  -4  -4   2 1405.49  193.84 
  -4  -4   2 1419.76  152.16 
   3   4  -2    7.14    4.56 
   3   4  -2    0.69    5.29 
   3   4  -2    4.14    1.77 
  -3  -4   2   -0.16    6.38 
  -3  -4   2    3.12    1.67 
  -3  -4   2    9.71    2.85 
  -3  -4   2    2.69    5.02 
  -3  -4   2   -3.17    5.94 
   3   4  -2   22.89   15.29 
  -3  -4   2  -98.25   70.54 
  -3  -4   2   11.04   16.78 
   2   4  -2 2052.57  119.59 
   2   4  -2 1943.57  133.07 
   2   4  -2 2073.29  177.07 
  -2  -4   2 2014.40  130.96 
  -2  -4   2 2091.61  132.68 
   2   4  -2 1808.93  195.49 
  -2  -4   2 1909.82  200.83 
  -2  -4   2 1863.23  270.57 
   1   4  -2  323.84   28.76 
   1   4  -2  322.71   21.39 
   1   4  -2  324.96   24.43 
  -1  -4   2  326.69   23.00 
  -1  -4   2  342.60   25.99 
   1   4  -2  260.02   67.99 
   1   4  -2  290.74   42.12 
  -1  -4   2  378.64   48.04 
   0   4  -2   24.68   12.28 
   0   4  -2   30.76   10.14 
   0   4  -2   10.46    0.94 
   0  -4   2    5.35    7.84 
   0  -4   2    1.74    7.38 
   0   4  -2  -34.51   23.49 
   0  -4   2  -60.09   36.08 
  -1   4  -2  232.90   21.66 
   1  -4   2  197.31   21.05 
   1  -4   2  224.01   21.71 
  -1   4  -2  245.49   52.02 
   1  -4   2  144.45   52.87 
  -2   4  -2  390.79   31.32 
  -2   4  -2  393.46   32.36 
   2  -4   2  439.92   31.46 
   2  -4   2  449.40   31.59 
  -2   4  -2  515.54   72.04 
   2  -4   2  479.00   75.25 
  -3   4  -2 2119.01  137.00 
  -3   4  -2 2113.84  153.65 
   3  -4   2 2086.89  133.62 
   3  -4   2 2163.45  130.91 
  -3   4  -2 2229.76  256.00 
   3  -4   2 2210.05  243.12 
  -4   4  -2    7.26   17.08 
  -4   4  -2   48.06   18.79 
   4  -4   2   22.72   16.30 
   4  -4   2   24.77   16.78 
  -4   4  -2  136.61   70.51 
   4  -4   2  -55.73   64.91 
  -5   4  -2  615.57   45.13 
  -5   4  -2  501.16   63.73 
   5  -4   2  563.63   55.87 
   5  -4   2  602.25   30.95 
   5  -4   2  568.77   42.68 
  -5   4  -2  605.74   96.72 
   5  -4   2  576.24  110.20 
  -6   4  -2   30.34   21.41 
  -6   4  -2   -3.00   20.89 
   6  -4   2   -7.91   19.06 
   6  -4   2    4.01    2.05 
   6  -4   2  -14.26   18.42 
  -6   4  -2    5.19   85.87 
   6  -4   2    5.28   85.05 
  -7   4  -2   13.93   22.85 
  -7   4  -2   11.04   17.05 
   7  -4   2   21.48    2.75 
   7  -4   2   51.57   22.07 
   7  -4   2   17.64   16.19 
  -7   4  -2   78.74  102.10 
   7  -4   2  -98.04   69.09 
  -8   4  -2   14.47   26.23 
  -8   4  -2   17.84   19.92 
   8  -4   2   27.34    9.43 
   8  -4   2   36.26    4.74 
   8  -4   2   37.41   17.98 
   8  -4   2   16.81   22.16 
  -8   4  -2   45.98  123.20 
   8  -4   2   15.25   66.89 
  -9   4  -2   11.09   20.30 
   9  -4   2   17.55   17.79 
   9  -4   2    2.19   23.46 
   9  -4   2    7.19    3.30 
   9  -4   2    1.04    9.57 
  -9   4  -2  -37.82  123.17 
   9  -4   2   -8.88   79.41 
 -10   4  -2   -2.08   21.15 
  10  -4   2   -4.29   11.04 
  10  -4   2   -2.77   19.32 
  10  -4   2    7.30    3.87 
  11  -4   2  -19.35   29.69 
  11  -4   2   15.69   19.95 
  12   3  -2   84.67   26.47 
 -12  -3   2   75.16    5.99 
 -12  -3   2   77.06    8.83 
  11   3  -2  372.17   31.26 
  11   3  -2  253.97   31.91 
 -11  -3   2  306.08   25.98 
 -11  -3   2  286.89   17.87 
  10   3  -2  305.19   30.46 
  10   3  -2  297.82   36.51 
  10   3  -2  291.19   34.81 
 -10  -3   2  326.26   30.00 
 -10  -3   2  290.59   16.64 
 -10  -3   2   14.12   33.78 
 -10  -3   2  287.77   37.62 
   9   3  -2   -2.71    6.59 
   9   3  -2  -13.23   10.53 
   9   3  -2   -2.34    6.33 
  -9  -3   2   -6.15    7.83 
  -9  -3   2   -0.98    6.33 
  -9  -3   2    6.22    3.30 
  -9  -3   2   -0.92    3.31 
  -9  -3   2 -231.17  189.13 
  -9  -3   2  -45.25   36.36 
   8   3  -2   12.61   13.68 
   8   3  -2    8.07    6.52 
   8   3  -2   15.62    8.05 
  -8  -3   2   11.93    7.78 
  -8  -3   2   15.66    2.65 
  -8  -3   2   12.50    7.64 
  -8  -3   2   11.89    4.45 
  -8  -3   2   -6.31   25.45 
  -8  -3   2  -43.25  120.76 
   7   3  -2  213.58   19.37 
   7   3  -2  155.51   15.79 
   7   3  -2  174.06   14.05 
  -7  -3   2  172.14    8.80 
  -7  -3   2  175.68   12.66 
  -7  -3   2  132.97   18.64 
  -7  -3   2  160.08   13.80 
  -7  -3   2  122.69   30.77 
  -7  -3   2  105.09  103.58 
   6   3  -2  197.29   17.74 
   6   3  -2  193.05   15.41 
   6   3  -2  208.41   16.14 
  -6  -3   2  175.05   18.42 
  -6  -3   2  223.09   15.49 
  -6  -3   2  222.35   10.12 
  -6  -3   2  201.92   13.16 
  -6  -3   2  188.80   20.79 
  -6  -3   2  -53.61   79.49 
  -6  -3   2  153.04   24.49 
  -6  -3   2  197.77   33.45 
   5   3  -2  135.80    9.84 
   5   3  -2  145.41   11.18 
   5   3  -2  124.23   14.34 
  -5  -3   2  126.12   11.06 
  -5  -3   2  125.92   12.25 
  -5  -3   2  144.24   10.76 
  -5  -3   2  132.68   10.95 
  -5  -3   2  142.52    7.27 
  -5  -3   2  186.82   23.45 
  -5  -3   2  159.16   29.40 
  -5  -3   2   56.54   69.34 
   4   3  -2   51.49   10.05 
   4   3  -2   46.28    5.63 
   4   3  -2   57.70    5.17 
  -4  -3   2   54.85    6.87 
  -4  -3   2   51.87    5.03 
  -4  -3   2   63.60    3.65 
  -4  -3   2   61.93    5.73 
  -4  -3   2   72.34    4.58 
  -4  -3   2   40.43   77.35 
  -4  -3   2   35.07   12.14 
  -4  -3   2   45.67   15.47 
   3   3  -2  780.77   59.86 
  -3  -3   2  815.63   40.07 
  -3  -3   2  808.04   42.34 
  -3  -3   2  797.96   54.91 
  -3  -3   2  750.72   55.93 
  -3  -3   2  804.71   51.45 
  -3  -3   2  816.11  109.03 
  -3  -3   2  681.53   77.94 
   2   3  -2 2317.80  158.32 
   2   3  -2 2479.37  194.58 
  -2  -3   2 2620.14  135.56 
  -2  -3   2 2580.94  184.84 
  -2  -3   2 2571.97  170.49 
   2   3  -2 2486.74  270.16 
  -2  -3   2 2243.22  272.80 
  -2  -3   2 2924.69  312.06 
   1   3  -2    6.74    1.84 
   1   3  -2   18.84    6.24 
   1   3  -2   22.49    6.87 
  -1  -3   2   -1.41    7.24 
  -1  -3   2    4.88    8.31 
   1   3  -2   11.89   47.32 
   1   3  -2   -0.55   18.64 
  -1  -3   2   20.32   21.92 
   0   3  -2   88.04   12.32 
   0   3  -2   74.39    9.00 
   0  -3   2   79.94   10.03 
   0  -3   2   74.15   11.51 
   0   3  -2  100.07   31.37 
   0  -3   2   71.11   25.76 
  -1   3  -2  897.75   76.98 
  -1   3  -2  924.14   68.60 
   1  -3   2  916.01   65.66 
   1  -3   2  864.65   58.87 
  -1   3  -2  916.31  104.16 
   1  -3   2  910.33  114.31 
  -2   3  -2   39.78   10.32 
  -2   3  -2   27.10   13.87 
   2  -3   2   19.47    9.73 
   2  -3   2   23.41   12.83 
  -2   3  -2   28.46   45.40 
   2  -3   2   47.56   34.48 
  -3   3  -2   37.42   11.30 
  -3   3  -2   30.54   11.47 
   3  -3   2   24.52   22.60 
   3  -3   2   10.60    9.84 
  -3   3  -2  -50.24   37.91 
   3  -3   2   95.56   39.73 
  -4   3  -2  905.71   76.09 
  -4   3  -2  883.39   67.39 
   4  -3   2  807.72   62.75 
   4  -3   2  868.03   40.60 
   4  -3   2  794.58   63.45 
  -4   3  -2  877.59  122.83 
   4  -3   2  911.13  125.09 
  -5   3  -2 2549.56  217.37 
  -5   3  -2 2705.76  180.77 
   5  -3   2 2613.91  200.65 
   5  -3   2 2445.00  136.64 
   5  -3   2 2655.09  160.52 
  -5   3  -2 2984.06  304.49 
   5  -3   2 2459.86  335.94 
  -6   3  -2  855.22   61.86 
  -6   3  -2  928.68   83.63 
   6  -3   2  867.75   41.35 
   6  -3   2  897.16   62.19 
   6  -3   2  878.69   90.47 
  -6   3  -2  728.46  106.66 
   6  -3   2  645.84  115.97 
  -7   3  -2  341.73   42.93 
  -7   3  -2  356.35   36.48 
   7  -3   2  328.96   32.85 
   7  -3   2  342.09   41.31 
   7  -3   2  337.57   20.83 
  -7   3  -2  344.80  102.25 
   7  -3   2  243.04   92.72 
  -8   3  -2  419.33   44.88 
  -8   3  -2  356.37   45.44 
   8  -3   2  398.21   26.57 
   8  -3   2  444.27   41.14 
   8  -3   2  390.34  203.17 
   8  -3   2  422.11   35.02 
  -8   3  -2  110.93  105.95 
   8  -3   2  361.30  108.79 
  -9   3  -2  306.85   34.28 
   9  -3   2  270.24   33.49 
   9  -3   2  297.98   19.21 
   9  -3   2  310.12   26.93 
   9  -3   2  327.47   32.52 
  -9   3  -2  198.77  113.73 
   9  -3   2  163.80  111.77 
 -10   3  -2   80.18   49.55 
  10  -3   2   56.36  106.37 
  10  -3   2   30.66   12.33 
  10  -3   2  113.69   87.36 
  11  -3   2  189.80   28.81 
  11  -3   2  133.81   35.19 
  11   2  -2  158.02   26.17 
  11   2  -2  123.77   20.21 
 -11  -2   2  138.22   13.35 
 -11  -2   2  136.86    9.73 
  10   2  -2  268.97   26.40 
  10   2  -2  315.05   25.54 
  10   2  -2  232.78   25.06 
 -10  -2   2  302.57   22.89 
 -10  -2   2  276.48   14.78 
 -10  -2   2  194.08   29.99 
 -10  -2   2  -21.96   62.33 
   9   2  -2  -10.18    8.84 
   9   2  -2    9.96    9.74 
   9   2  -2    6.92   15.15 
  -9  -2   2   -8.45    4.43 
  -9  -2   2   -6.42    3.18 
  -9  -2   2    5.67   12.31 
  -9  -2   2   -2.51   10.83 
   9   2  -2   24.22   25.75 
  -9  -2   2 -170.67  179.13 
  -9  -2   2  -45.45   47.73 
   8   2  -2  612.61   53.94 
   8   2  -2  794.87   58.63 
  -8  -2   2  728.29   34.45 
  -8  -2   2  688.42   99.59 
  -8  -2   2  679.40   99.29 
  -8  -2   2  853.58   43.35 
  -8  -2   2  247.66  125.07 
   7   2  -2  815.97   60.63 
   7   2  -2  701.96   60.09 
  -7  -2   2  848.53   38.77 
  -7  -2   2  870.24   49.69 
  -7  -2   2  763.73   80.98 
  -7  -2   2  803.19   51.32 
  -7  -2   2   50.23   92.46 
   6   2  -2   78.18    8.03 
   6   2  -2   52.70    9.76 
  -6  -2   2   78.49    4.94 
  -6  -2   2   51.64    9.40 
  -6  -2   2   47.79    8.09 
  -6  -2   2   69.16    4.32 
   6   2  -2   36.64   21.08 
  -6  -2   2   73.95   23.55 
   5   2  -2 1236.20   87.76 
   5   2  -2 1207.05   81.20 
  -5  -2   2 1246.92   69.97 
  -5  -2   2 1249.07  102.15 
  -5  -2   2 1210.74   76.02 
  -5  -2   2 1302.91   56.71 
  -5  -2   2 1229.17  110.83 
   5   2  -2  878.30  103.52 
  -5  -2   2 1083.84  113.99 
   4   2  -2  698.69   49.78 
   4   2  -2  701.28   46.79 
   4   2  -2  661.39   45.80 
  -4  -2   2  764.61   44.90 
  -4  -2   2  657.76   39.07 
  -4  -2   2  675.16   49.87 
  -4  -2   2  671.34   33.12 
  -4  -2   2  668.40   43.15 
  -4  -2   2  555.05   61.43 
  -4  -2   2  487.46   92.55 
   3   2  -2   16.23    7.63 
   3   2  -2   19.60    2.17 
   3   2  -2   15.52    2.02 
  -3  -2   2   22.46    2.08 
  -3  -2   2   13.80    1.95 
  -3  -2   2   17.07    5.97 
  -3  -2   2   18.23    2.02 
  -3  -2   2   15.29    2.17 
  -3  -2   2   34.08   56.72 
  -3  -2   2    7.05    4.05 
  -3  -2   2   22.49    6.57 
   2   2  -2  120.63    8.55 
  -2  -2   2  133.73    9.74 
  -2  -2   2  124.63    8.66 
  -2  -2   2  139.10    9.92 
  -2  -2   2  122.39    9.21 
   2   2  -2  103.06   14.80 
  -2  -2   2   66.53   54.48 
  -2  -2   2  125.23   15.69 
   1   2  -2 9228.83  614.01 
   1   2  -2 8542.95  653.40 
   1   2  -2 8050.72  566.06 
  -1  -2   2 8973.97  608.32 
  -1  -2   2 9577.19  609.19 
  -1  -2   2 8967.85  485.51 
   1   2  -2 8717.60  997.71 
   1   2  -2 9404.53 1083.39 
  -1  -2   2 9999.00 1003.60 
   0   2  -2  480.03   34.59 
   0   2  -2  423.10   25.89 
   0   2  -2  440.70   36.01 
   0  -2   2  449.67   30.50 
   0  -2   2  369.48   27.18 
   0   2  -2  504.90   56.78 
   0  -2   2  428.97   56.79 
  -1   2  -2    0.54    9.16 
  -1   2  -2   22.26   10.03 
   1  -2   2    2.81    9.50 
   1  -2   2    9.93    7.25 
  -1   2  -2   48.75   31.52 
   1  -2   2  -10.75   30.66 
  -2   2  -2  110.32   14.97 
  -2   2  -2  100.06   12.54 
   2  -2   2   96.55   12.43 
   2  -2   2   78.74   14.04 
  -2   2  -2   88.03   32.33 
   2  -2   2  109.60   39.41 
  -3   2  -2  536.81   43.21 
  -3   2  -2  448.30   33.18 
   3  -2   2  445.36   35.57 
   3  -2   2  463.30   37.44 
  -3   2  -2  412.77   75.49 
   3  -2   2  496.09   71.83 
  -4   2  -2 1523.99   98.95 
  -4   2  -2 1418.07   97.60 
   4  -2   2 1422.80   68.37 
   4  -2   2 1385.37   90.62 
  -4   2  -2 1482.68  168.53 
   4  -2   2 1440.73  170.50 
  -5   2  -2 1851.46  116.26 
  -5   2  -2 1787.99  124.67 
   5  -2   2 1764.25  112.89 
   5  -2   2 1848.72   83.14 
   5  -2   2 1806.05  120.15 
  -5   2  -2 1687.46  210.89 
   5  -2   2 1890.18  231.38 
  -6   2  -2   17.76   18.66 
  -6   2  -2   81.29   16.45 
   6  -2   2   56.33   14.24 
   6  -2   2   36.46   15.92 
   6  -2   2   55.03    3.69 
  -6   2  -2   87.28   79.06 
   6  -2   2   48.69   45.83 
  -7   2  -2   58.77   21.84 
  -7   2  -2   54.99   15.69 
   7  -2   2   26.40   17.67 
   7  -2   2   69.22   14.65 
   7  -2   2   31.48    2.79 
  -7   2  -2  -21.27   57.65 
   7  -2   2  -93.32   73.86 
  -8   2  -2   -6.30   20.67 
  -8   2  -2   20.16   21.54 
   8  -2   2   15.71   17.50 
   8  -2   2   11.40    8.02 
   8  -2   2    6.65    2.92 
   8  -2   2    6.72   17.39 
  -8   2  -2   13.31   92.04 
   8  -2   2   20.07   85.06 
  -9   2  -2  213.35   28.22 
  -9   2  -2  219.68   35.25 
   9  -2   2  201.86   11.92 
   9  -2   2  177.43   18.88 
   9  -2   2  181.06   27.50 
   9  -2   2  272.43   26.53 
  -9   2  -2  244.35   91.02 
   9  -2   2  149.45  106.71 
 -10   2  -2   16.24   19.62 
  10  -2   2   36.90    4.70 
  10  -2   2   41.62   22.74 
  10  -2   2    4.47   15.49 
  10  -2   2   36.73   16.33 
 -10   2  -2   94.04   96.67 
  10  -2   2   95.98  115.02 
 -11   2  -2   12.79    4.53 
  11  -2   2   12.41   13.09 
  11  -2   2   14.95   23.57 
  11   1  -2  155.74   25.74 
  11   1  -2  102.78   17.93 
 -11  -1   2  114.58   11.43 
 -11  -1   2  115.11    7.27 
  10   1  -2  385.25   45.95 
  10   1  -2  415.21   39.56 
 -10  -1   2  325.68   36.42 
 -10  -1   2  419.12   28.80 
 -10  -1   2  394.69   21.73 
  10   1  -2  150.21   54.38 
   9   1  -2   73.98   14.49 
   9   1  -2   79.93   12.99 
   9   1  -2   92.96   13.52 
  -9  -1   2  106.73   17.80 
  -9  -1   2   82.32    5.54 
  -9  -1   2   97.51    7.61 
  -9  -1   2   63.75   14.91 
   9   1  -2   51.64   51.35 
  -9  -1   2   79.06   51.70 
  -9  -1   2  337.52  195.54 
   8   1  -2  250.07   23.97 
   8   1  -2  257.44   21.58 
   8   1  -2  272.43   21.51 
  -8  -1   2  233.44   12.37 
  -8  -1   2  228.30   14.84 
  -8  -1   2  247.97   21.15 
  -8  -1   2  251.01   23.25 
   8   1  -2  159.16   45.06 
  -8  -1   2  117.94   46.35 
  -8  -1   2  173.77  114.97 
   7   1  -2 1117.59   75.61 
   7   1  -2 1203.01   65.35 
   7   1  -2 1273.65   89.80 
   7   1  -2 1224.17  117.79 
  -7  -1   2 1158.28   73.29 
  -7  -1   2 1085.99  103.34 
  -7  -1   2 1129.54   56.53 
   7   1  -2  826.54  162.00 
  -7  -1   2  997.48  125.67 
   6   1  -2 2457.15  169.65 
   6   1  -2 2515.60  119.97 
   6   1  -2 2587.93  169.63 
  -6  -1   2 2503.71  232.77 
  -6  -1   2 2527.99  113.77 
  -6  -1   2 2341.79  171.21 
   6   1  -2 1898.03  253.13 
  -6  -1   2 2103.16  264.95 
   5   1  -2 2166.48  141.46 
   5   1  -2 2022.16  108.69 
   5   1  -2 2106.77  148.49 
  -5  -1   2 2056.82  131.12 
  -5  -1   2 2062.07  101.58 
  -5  -1   2 1987.23  124.47 
  -5  -1   2 2135.52  148.41 
   5   1  -2  674.50   76.91 
   4   1  -2  408.25   26.43 
   4   1  -2  385.84   26.68 
  -4  -1   2  371.10   18.79 
  -4  -1   2  402.68   28.47 
  -4  -1   2  388.38   25.91 
  -4  -1   2  373.32   25.34 
   3   1  -2  286.00   18.47 
   3   1  -2  229.80   16.58 
  -3  -1   2  247.03   18.17 
  -3  -1   2  251.60   13.69 
  -3  -1   2  232.04   16.91 
  -3  -1   2  252.81   18.16 
   3   1  -2  155.93   21.49 
  -3  -1   2  249.30   63.95 
  -3  -1   2  192.69   24.18 
   2   1  -2  621.70   39.20 
  -2  -1   2  618.04   34.73 
  -2  -1   2  650.52   43.91 
  -2  -1   2  627.85   93.20 
   1   1  -2  618.62   45.81 
  -1  -1   2  614.76   39.36 
  -1  -1   2  624.24   44.84 
  -1  -1   2  637.86   45.05 
   1   1  -2  807.01   89.84 
   1   1  -2  587.44   66.81 
  -1  -1   2  583.49   68.61 
   0   1  -2 2093.09  147.57 
   0  -1   2 2025.53  139.76 
   0  -1   2 2045.14  152.11 
   0  -1   2 2079.85  138.66 
   0   1  -2 2289.53  222.58 
   0  -1   2 1947.04  216.89 
  -1   1  -2   96.07    9.74 
  -1   1  -2   99.61   20.56 
   1  -1   2  105.31   10.01 
   1  -1   2  108.77   12.27 
  -1   1  -2   76.11   18.89 
   1  -1   2  129.92   26.37 
  -2   1  -2 2219.45  181.61 
  -2   1  -2 2351.28  161.45 
   2  -1   2 2287.21  156.81 
   2  -1   2 2225.66  157.28 
  -2   1  -2 1968.91  256.39 
   2  -1   2 2255.81  227.92 
  -3   1  -2 1035.13   77.48 
  -3   1  -2 1088.44   74.44 
   3  -1   2 1098.67   76.84 
   3  -1   2 1031.14   72.38 
   3  -1   2 1042.64   51.30 
  -3   1  -2 1050.34  119.17 
   3  -1   2 1069.09  120.18 
  -4   1  -2 2948.98  177.08 
  -4   1  -2 3012.31  185.89 
   4  -1   2 2937.92  142.06 
   4  -1   2 2802.51  186.77 
   4  -1   2 2940.40  206.24 
  -4   1  -2 3663.04  375.41 
   4  -1   2 2622.56  341.13 
  -5   1  -2 4686.15  325.56 
  -5   1  -2 4692.44  462.10 
   5  -1   2 4621.38  329.52 
   5  -1   2 4792.09  235.40 
   5  -1   2 4434.39  307.48 
  -5   1  -2 4553.70  586.44 
   5  -1   2 4628.20  523.09 
  -6   1  -2 1619.61   99.62 
  -6   1  -2 1590.28  118.66 
   6  -1   2 1640.34   80.75 
   6  -1   2 1463.40   98.42 
   6  -1   2 1507.74  118.95 
  -6   1  -2 1774.82  285.08 
   6  -1   2 1608.94  201.47 
  -7   1  -2  237.04   31.74 
  -7   1  -2  303.11   28.51 
   7  -1   2  311.85   25.91 
   7  -1   2  282.42   17.04 
   7  -1   2  293.77   21.14 
   7  -1   2  290.94   31.63 
  -7   1  -2  285.11   97.54 
   7  -1   2  269.15   80.30 
  -8   1  -2  -11.48   19.09 
  -8   1  -2   20.85   14.66 
   8  -1   2   -0.08    7.06 
   8  -1   2    5.37    3.02 
   8  -1   2   25.00   16.59 
   8  -1   2   11.34   11.84 
  -8   1  -2   -6.06   63.83 
   8  -1   2   72.04   76.95 
  -9   1  -2  -15.76   18.10 
  -9   1  -2    5.32   16.07 
   9  -1   2   14.76    3.80 
   9  -1   2   16.95   12.85 
   9  -1   2   27.53   15.81 
   9  -1   2  -16.47   12.13 
  -9   1  -2   21.84   69.66 
   9  -1   2  -15.23   59.35 
 -10   1  -2    9.58   16.91 
 -10   1  -2   38.16    4.53 
  10  -1   2   24.64    4.69 
  10  -1   2   46.85   17.31 
  10  -1   2   53.00   12.50 
  10  -1   2   11.28   13.81 
 -10   1  -2  -43.07   82.41 
  10  -1   2  -31.46   75.10 
 -11   1  -2   -1.13    3.91 
  11  -1   2    7.36   22.26 
  11  -1   2   -5.30   16.63 
  11  -1   2   12.00    5.09 
  12  -1   2   48.78   26.68 
  12  -1   2   52.46   22.74 
  11   0  -2    9.82   20.49 
  11   0  -2   -6.67   14.56 
 -11   0   2   -0.71    5.88 
  10   0  -2   47.08   16.66 
  10   0  -2   58.26   15.39 
 -10   0   2   58.40    4.93 
 -10   0   2   53.28   19.39 
 -10   0   2   58.16    6.97 
   9   0  -2    3.27   11.56 
   9   0  -2  -11.58   11.80 
   9   0  -2   -4.44   10.61 
  -9   0   2   -1.06    2.76 
  -9   0   2    8.78   14.68 
  -9   0   2  -23.19   18.49 
   9   0  -2  -69.01   56.40 
  -9   0   2   34.68   52.79 
  -9   0   2  -66.06  170.84 
   8   0  -2    1.45    9.23 
   8   0  -2    9.45    3.03 
   8   0  -2   10.24    7.84 
   8   0  -2    2.44   10.27 
  -8   0   2    6.43    2.57 
  -8   0   2    7.83   11.70 
  -8   0   2   12.06   13.58 
   8   0  -2   51.12   49.08 
  -8   0   2  -45.18  102.37 
  -8   0   2  -72.21   47.71 
   7   0  -2   34.66   11.22 
   7   0  -2   69.91   12.06 
   7   0  -2   57.51    4.27 
   7   0  -2   65.85   14.11 
  -7   0   2   52.65   13.80 
  -7   0   2   60.05    3.92 
  -7   0   2   35.32   11.68 
   7   0  -2   64.45   43.11 
  -7   0   2  -23.59   42.09 
   6   0  -2   48.33   10.11 
   6   0  -2   48.90   10.80 
   6   0  -2   61.24    4.13 
   6   0  -2   51.67    9.97 
  -6   0   2   44.00   12.08 
  -6   0   2   45.41   10.97 
  -6   0   2   60.62    3.64 
   6   0  -2   13.73   35.18 
  -6   0   2   56.69   37.31 
   5   0  -2   15.78    8.05 
   5   0  -2   -9.11    7.36 
   5   0  -2   -0.34    1.39 
   5   0  -2   -3.15    6.39 
  -5   0   2  -10.53   10.07 
  -5   0   2   -1.45    1.13 
  -5   0   2   -3.69    7.49 
   5   0  -2  -19.89   33.33 
  -5   0   2  -29.21   26.69 
   4   0  -2    2.19    5.82 
   4   0  -2    7.63    1.81 
   4   0  -2   31.08    8.03 
   4   0  -2    9.84    6.55 
  -4   0   2    4.39    6.40 
  -4   0   2    3.98    4.13 
  -4   0   2    2.11    1.52 
  -4   0   2   -1.87    8.09 
   4   0  -2   46.72   27.15 
  -4   0   2   18.12   21.75 
   3   0  -2  899.52   47.72 
   3   0  -2  938.63   59.59 
   3   0  -2  953.06   60.71 
   3   0  -2  742.44   55.60 
  -3   0   2  939.68   45.04 
  -3   0   2  929.96   59.11 
  -3   0   2  894.55   56.67 
  -3   0   2  932.75   82.92 
   3   0  -2  861.88   97.79 
  -3   0   2 1046.76  120.36 
  -3   0   2  824.10  108.56 
   2   0  -2 1976.54  135.75 
   2   0  -2 2074.95  134.99 
  -2   0   2 2005.21  131.56 
  -2   0   2 2168.85  137.84 
  -2   0   2 2009.62  141.92 
  -2   0   2 2061.62  105.69 
  -2   0   2 2154.14  236.89 
  -2   0   2 1883.28  203.08 
   1   0  -2 1116.47   64.77 
   1   0  -2 1169.53   77.28 
   1   0  -2 1182.05   79.59 
  -1   0   2 1186.98   80.81 
  -1   0   2 1189.66   69.02 
  -1   0   2 1163.29   92.96 
  -1   0   2 1289.67   90.21 
   1   0  -2 1350.16  151.43 
  -1   0   2 1165.50  127.76 
   0   0  -2 2013.17  146.68 
   0   0  -2 2142.26  222.77 
  -1   0  -2 1614.18  139.26 
   1   0   2 1507.92  145.30 
   1   0   2 1536.01  106.68 
  -1   0  -2 1660.63  205.03 
   1   0   2 1609.44  210.39 
  -2   0  -2  526.96   43.50 
  -2   0  -2  489.01   36.08 
   2   0   2  544.89   25.89 
   2   0   2  508.53   36.38 
   2   0   2  471.59   34.97 
  -2   0  -2  521.20   59.79 
   2   0   2  517.50   60.35 
  -3   0  -2 3181.99  225.00 
  -3   0  -2 2814.62  192.66 
   3   0   2 2875.71  190.42 
   3   0   2 2858.98  189.89 
   3   0   2 3057.06  156.32 
  -3   0  -2 3074.54  343.22 
   3   0   2 3121.47  323.55 
  -4   0  -2   90.58    5.05 
  -4   0  -2  111.51   16.07 
  -4   0  -2  102.06   12.96 
   4   0   2   99.75   11.93 
   4   0   2  107.89    5.54 
   4   0   2   99.98   15.33 
  -4   0  -2  117.16   43.51 
   4   0   2  126.19   33.57 
  -5   0  -2   32.31   14.09 
  -5   0  -2   15.04    2.05 
  -5   0  -2    8.94   13.40 
   5   0   2    0.73   12.72 
   5   0   2   29.31   12.21 
   5   0   2   15.53    2.35 
  -5   0  -2   51.02   48.44 
   5   0   2  -24.62   42.26 
  -6   0  -2  -12.67   13.89 
  -6   0  -2    3.89    1.80 
  -6   0  -2   -0.22   10.82 
   6   0   2    6.78    9.98 
   6   0   2   13.70   12.52 
   6   0   2    2.45    2.29 
  -6   0  -2   -7.69   63.24 
   6   0   2   45.31   52.40 
  -7   0  -2  411.47   32.89 
  -7   0  -2  334.61   31.72 
   7   0   2  418.69   31.66 
   7   0   2  381.07   21.39 
   7   0   2  429.53   26.89 
   7   0   2  375.27   30.51 
  -7   0  -2  252.00   74.56 
   7   0   2  499.74   71.24 
  -8   0  -2    3.13    2.62 
  -8   0  -2   20.13   18.76 
  -8   0  -2  -10.89   18.78 
   8   0   2    5.13    7.35 
   8   0   2   -5.69   15.16 
   8   0   2   29.34   14.01 
  -8   0  -2   55.25   92.33 
   8   0   2   33.42   65.25 
  -9   0  -2 1177.76   76.50 
  -9   0  -2 1068.26   82.03 
  -9   0  -2 1028.51   77.09 
   9   0   2 1102.52   67.68 
   9   0   2 1179.17   80.45 
   9   0   2 1135.48   72.71 
   9   0   2 1108.15   78.36 
  -9   0  -2 1099.16  182.77 
   9   0   2 1308.55  184.88 
 -10   0  -2  571.67   54.84 
 -10   0  -2  626.86   45.53 
 -10   0  -2  655.60   50.87 
  10   0   2  610.04   53.89 
  10   0   2  709.72   56.25 
  10   0   2  708.76   53.54 
  10   0   2  571.46   38.01 
 -10   0  -2  594.55  117.26 
  10   0   2  514.27  117.51 
 -11   0  -2    5.73    4.07 
  11   0   2  -13.31   18.78 
  11   0   2   18.72   17.08 
  11   0   2    9.86    6.91 
  12   0   2   42.93   18.50 
  12   0   2   54.39   17.05 
  11  -1  -2   90.78   19.65 
  11  -1  -2  145.15   23.94 
 -11   1   2  101.47   10.16 
 -11   1   2  102.08   13.57 
  10  -1  -2  301.00   27.78 
  10  -1  -2  305.30   29.84 
 -10   1   2  240.19   32.19 
   9  -1  -2   -5.63   10.46 
   9  -1  -2    6.35   12.79 
   9  -1  -2    2.79   15.15 
  -9   1   2   -1.04   16.69 
  -9   1   2    2.55    2.07 
  -9   1   2  -24.62   17.94 
   9  -1  -2  -32.35   69.14 
  -9   1   2  137.17  125.56 
  -9   1   2   -4.74   63.79 
   8  -1  -2  185.53   19.76 
   8  -1  -2  158.57   17.87 
   8  -1  -2  150.07   10.38 
   8  -1  -2  156.70   17.68 
  -8   1   2  159.22    8.33 
  -8   1   2  176.28   23.37 
  -8   1   2  160.56   45.56 
   8  -1  -2  100.36   61.22 
  -8   1   2   96.88   47.17 
  -8   1   2  176.88  116.53 
   7  -1  -2   60.17    3.90 
   7  -1  -2   69.91   14.65 
   7  -1  -2   61.83   14.09 
   7  -1  -2   67.94   11.75 
  -7   1   2   60.91    4.21 
  -7   1   2   64.51   12.28 
  -7   1   2   64.88   16.75 
   7  -1  -2  107.24   52.77 
  -7   1   2  -22.29   87.82 
  -7   1   2  126.45   40.91 
   6  -1  -2  489.31   39.41 
   6  -1  -2  465.38   40.23 
   6  -1  -2  510.01   39.64 
   6  -1  -2  522.43   24.89 
  -6   1   2  509.42   24.92 
  -6   1   2  495.70   39.40 
  -6   1   2  499.85   41.77 
   6  -1  -2  445.35   71.99 
  -6   1   2  421.71   68.78 
   5  -1  -2  174.36    8.96 
   5  -1  -2  178.90   15.61 
   5  -1  -2  177.61   15.23 
   5  -1  -2  164.05   19.64 
  -5   1   2  160.67   18.18 
  -5   1   2  193.06   16.03 
  -5   1   2  162.58    8.44 
   5  -1  -2   76.21   39.75 
  -5   1   2  157.64   33.91 
   4  -1  -2  165.83   14.41 
   4  -1  -2  162.39   15.24 
   4  -1  -2  143.83   12.88 
   4  -1  -2  177.44    8.70 
  -4   1   2  159.90    8.01 
  -4   1   2  145.66   14.41 
  -4   1   2  159.02   15.83 
   4  -1  -2  105.48   31.06 
  -4   1   2  102.30   31.65 
   3  -1  -2  510.51   47.30 
   3  -1  -2  533.04   29.84 
   3  -1  -2  554.36   42.03 
   3  -1  -2  549.43   41.66 
  -3   1   2  616.75   37.41 
  -3   1   2  518.80   29.22 
  -3   1   2  589.45   47.93 
  -3   1   2  572.65   38.06 
   3  -1  -2  608.85   70.46 
  -3   1   2  632.72   84.24 
  -3   1   2  508.05   69.47 
   2  -1  -2 3982.61  254.06 
   2  -1  -2 3897.12  266.26 
   2  -1  -2 3920.95  276.38 
  -2   1   2 4081.14  266.32 
  -2   1   2 3748.35  199.79 
  -2   1   2 4062.54  229.80 
  -2   1   2 3686.18  252.57 
  -2   1   2 3969.23  255.62 
   2  -1  -2 3666.54  415.00 
  -2   1   2 3753.25  404.07 
  -2   1   2 4235.60  527.24 
   1  -1  -2   51.06    5.51 
   1  -1  -2   56.99    6.69 
   1  -1  -2   42.37    2.81 
   1  -1  -2   42.69    5.88 
  -1   1   2   40.04    5.34 
  -1   1   2   46.03    6.85 
  -1   1   2   32.64    4.10 
  -1   1   2   45.08    3.13 
   1  -1  -2   84.83   28.65 
   1  -1  -2   92.14   17.19 
   0  -1  -2  405.99   27.52 
   0   1   2  390.12   30.13 
   0   1   2  440.28   24.53 
   0   1   2  444.14   30.92 
   0   1   2  444.78   30.59 
   0  -1  -2  285.35   40.44 
   0   1   2  420.08   40.42 
  -1  -1  -2  432.11   35.03 
  -1  -1  -2  490.87   32.80 
   1   1   2  436.82   44.37 
   1   1   2  481.06   24.82 
   1   1   2  476.69   30.98 
  -1  -1  -2  537.48   58.00 
  -2  -1  -2 1109.45   55.35 
  -2  -1  -2 1051.01   77.97 
  -2  -1  -2  980.31   74.86 
   2   1   2 1079.45   61.42 
   2   1   2  994.76   71.88 
   2   1   2 1073.36   51.18 
   2   1   2 1056.96   70.30 
  -2  -1  -2 1120.91  120.59 
   2   1   2 1116.41  117.27 
  -3  -1  -2   21.48    1.59 
  -3  -1  -2   32.26    7.66 
  -3  -1  -2   14.61    9.56 
  -3  -1  -2   22.18    1.72 
   3   1   2   30.93    7.51 
   3   1   2   21.17    1.98 
   3   1   2    5.78    9.74 
  -3  -1  -2   -3.63   28.12 
   3   1   2   27.44   19.69 
  -4  -1  -2  306.21   24.86 
  -4  -1  -2  290.17   14.77 
  -4  -1  -2  320.23   26.47 
  -4  -1  -2  293.75   21.39 
   4   1   2  320.35   31.62 
   4   1   2  313.37   14.28 
   4   1   2  323.26   25.01 
  -4  -1  -2  287.99   48.64 
   4   1   2  230.30   46.43 
  -5  -1  -2 1180.06   73.74 
  -5  -1  -2 1086.63   83.02 
  -5  -1  -2 1052.18   62.37 
  -5  -1  -2 1108.35   50.55 
   5   1   2 1123.22   76.77 
   5   1   2 1092.73   55.93 
   5   1   2 1077.16   77.40 
  -5  -1  -2 1322.39  138.33 
   5   1   2 1088.29  130.64 
  -6  -1  -2  227.28   10.29 
  -6  -1  -2  176.41   22.37 
  -6  -1  -2  197.78   11.75 
  -6  -1  -2  208.16   22.66 
   6   1   2  199.75   10.15 
   6   1   2  182.59   21.44 
   6   1   2  237.21   16.46 
   6   1   2  194.13   20.75 
  -6  -1  -2   98.47   57.00 
   6   1   2  140.29   49.61 
  -7  -1  -2 1304.92   84.75 
  -7  -1  -2 1291.29   76.45 
  -7  -1  -2 1362.86   60.52 
  -7  -1  -2 1313.67   97.29 
   7   1   2 1335.43   76.89 
   7   1   2 1289.30   83.03 
   7   1   2 1394.86   87.40 
   7   1   2 1322.60   84.61 
  -7  -1  -2 1385.47  179.87 
   7   1   2 1347.82  154.43 
  -8  -1  -2   79.16    5.24 
  -8  -1  -2   56.18   19.57 
  -8  -1  -2   79.83    6.03 
  -8  -1  -2   89.67   16.40 
   8   1   2  105.37   38.26 
   8   1   2  102.97   18.75 
   8   1   2   86.14    5.57 
   8   1   2   61.94   10.16 
  -8  -1  -2  121.04   86.98 
   8   1   2    1.50   40.88 
  -9  -1  -2   79.59   22.15 
  -9  -1  -2   26.80   21.23 
  -9  -1  -2   80.04    7.21 
   9   1   2   78.64    5.38 
   9   1   2   95.13   19.95 
   9   1   2  101.54   15.36 
  -9  -1  -2  -13.26  102.81 
   9   1   2   29.21   69.67 
 -10  -1  -2  123.39   21.83 
 -10  -1  -2  162.30   12.89 
 -10  -1  -2  153.70   28.32 
  10   1   2  150.31   19.42 
  10   1   2  176.75   17.96 
  10   1   2  162.47   26.35 
  10   1   2  138.67   12.57 
 -10  -1  -2   51.69   76.64 
  10   1   2  228.62   85.93 
 -11  -1  -2   94.90    8.52 
  11   1   2  136.90   22.38 
  11   1   2   69.54   18.96 
 -12  -1  -2   44.51    6.47 
  12   1   2   67.75   21.79 
  12   1   2   49.00   22.55 
  11  -2  -2   11.49   22.27 
  11  -2  -2  -15.67   22.20 
 -11   2   2    3.38   10.99 
  10  -2  -2   -7.30   18.03 
  10  -2  -2   13.47   13.86 
 -10   2   2   21.06    9.94 
   9  -2  -2  186.01   23.51 
   9  -2  -2  155.77   12.27 
   9  -2  -2  193.12   26.14 
   9  -2  -2  195.85   23.61 
  -9   2   2  173.41   13.90 
  -9   2   2  143.67   27.77 
  -9   2   2  135.20   33.61 
   9  -2  -2  215.67   92.83 
  -9   2   2  193.04  192.11 
  -9   2   2   15.84   79.33 
   8  -2  -2  126.75    7.10 
   8  -2  -2  123.84   15.62 
   8  -2  -2  103.67   16.50 
   8  -2  -2  103.50   19.94 
  -8   2   2   75.92   23.10 
  -8   2   2  138.08   22.60 
   8  -2  -2  146.21   70.74 
  -8   2   2   25.67  148.06 
  -8   2   2   48.95   50.43 
   7  -2  -2  393.67   34.73 
   7  -2  -2  419.13   32.24 
   7  -2  -2  396.50   32.55 
   7  -2  -2  442.55   22.90 
  -7   2   2  344.78   37.44 
  -7   2   2  488.75   35.65 
   7  -2  -2  352.73   79.38 
  -7   2   2  269.77   84.43 
  -7   2   2  329.39  106.58 
   6  -2  -2   32.95    2.68 
   6  -2  -2    8.06    9.66 
   6  -2  -2   19.65   10.86 
   6  -2  -2   -4.07   12.58 
  -6   2   2   35.26   14.40 
  -6   2   2   39.73   12.15 
  -6   2   2   26.95    2.38 
   6  -2  -2   14.01   35.32 
  -6   2   2  -32.57   48.08 
  -6   2   2   10.05   64.81 
   5  -2  -2   94.63   13.30 
   5  -2  -2  103.74   15.30 
   5  -2  -2  112.08   12.72 
   5  -2  -2  102.23    5.37 
  -5   2   2   69.95   15.26 
  -5   2   2  100.84    5.31 
  -5   2   2   84.83   16.59 
   5  -2  -2   97.65   52.80 
  -5   2   2  102.96   46.20 
   4  -2  -2  197.73   14.49 
   4  -2  -2  194.07   10.25 
   4  -2  -2  180.80   16.47 
   4  -2  -2  193.22   18.52 
  -4   2   2  193.38   17.54 
  -4   2   2  176.33    9.48 
  -4   2   2  141.23   17.32 
  -4   2   2  107.77   30.45 
  -4   2   2    7.70   38.40 
   3  -2  -2 6608.08  464.66 
   3  -2  -2 6061.08  417.70 
   3  -2  -2 5849.65  472.38 
   3  -2  -2 5785.25  331.83 
  -3   2   2 6090.29  308.46 
  -3   2   2 6143.76  494.52 
  -3   2   2 5969.54  330.32 
  -3   2   2 6496.21  404.55 
   3  -2  -2 5743.84  653.61 
  -3   2   2 6365.70  846.63 
  -3   2   2 5881.47  699.98 
   2  -2  -2  228.56   13.31 
   2  -2  -2  215.12   17.62 
   2  -2  -2  260.91   20.12 
   2  -2  -2  270.06   16.69 
  -2   2   2  243.22   12.33 
  -2   2   2  236.54   23.18 
  -2   2   2  224.52   17.69 
  -2   2   2  248.06   14.64 
   2  -2  -2  293.30   37.99 
  -2   2   2  289.08   41.42 
  -2   2   2  185.91   48.30 
   1  -2  -2  153.26   12.84 
   1  -2  -2  177.05   17.20 
   1  -2  -2  165.29   11.35 
   1  -2  -2  140.41    9.68 
  -1   2   2  160.94    9.07 
  -1   2   2  156.51   10.63 
  -1   2   2  139.84   14.52 
  -1   2   2  160.37   13.20 
   1  -2  -2  173.97   25.34 
   1  -2  -2  127.44   30.46 
  -1   2   2  145.10   27.87 
   0  -2  -2  353.62   19.40 
   0  -2  -2  347.50   18.03 
   0  -2  -2  351.03   27.15 
   0  -2  -2  359.49   23.89 
   0  -2  -2  349.65   27.43 
   0   2   2  361.76   24.04 
   0   2   2  370.60   21.77 
   0   2   2  345.35   17.05 
   0   2   2  364.26   27.33 
   0   2   2  365.64   23.86 
   0  -2  -2  376.75   43.95 
   0   2   2  362.70   44.25 
  -1  -2  -2  892.86   43.42 
  -1  -2  -2  864.96   59.77 
  -1  -2  -2  887.93   57.74 
   1   2   2  929.93   47.96 
   1   2   2  861.00   59.95 
   1   2   2  822.02   62.11 
  -1  -2  -2  773.00   89.22 
  -2  -2  -2 3098.44  231.40 
  -2  -2  -2 3010.41  146.33 
  -2  -2  -2 2826.73  199.83 
   2   2   2 3069.66  147.45 
   2   2   2 2943.89  206.70 
   2   2   2 2998.98  189.64 
  -2  -2  -2 3282.13  347.91 
  -3  -2  -2  136.64    7.14 
  -3  -2  -2  182.95   15.31 
  -3  -2  -2  143.96   13.73 
   3   2   2  145.22   13.50 
   3   2   2  144.45    7.62 
   3   2   2  162.77   15.36 
   3   2   2  141.18    8.41 
  -3  -2  -2  191.17   32.48 
   3   2   2  200.96   32.34 
  -4  -2  -2  589.16   27.76 
  -4  -2  -2  580.55   30.69 
  -4  -2  -2  620.13   43.72 
  -4  -2  -2  554.27   39.43 
   4   2   2  549.37   40.17 
   4   2   2  593.06   39.65 
   4   2   2  573.20   27.36 
  -4  -2  -2  607.65   74.65 
   4   2   2  506.90   64.08 
  -5  -2  -2  517.79   25.04 
  -5  -2  -2  464.43   44.38 
  -5  -2  -2  586.18   43.04 
  -5  -2  -2  505.82   27.43 
   5   2   2  550.15   33.64 
   5   2   2  584.56   48.50 
   5   2   2  504.95   35.15 
   5   2   2  547.91   44.61 
  -5  -2  -2  468.98   63.96 
   5   2   2  304.46   55.83 
  -6  -2  -2  115.91    5.77 
  -6  -2  -2   98.25   16.33 
  -6  -2  -2   77.43   13.64 
  -6  -2  -2  101.65    5.95 
   6   2   2  100.53   10.95 
   6   2   2   98.55    5.52 
   6   2   2   89.17   15.71 
   6   2   2  107.08   14.10 
  -6  -2  -2   93.49   38.64 
   6   2   2   49.81   40.71 
  -7  -2  -2  154.55    7.70 
  -7  -2  -2   93.16   19.03 
  -7  -2  -2  171.48   21.06 
  -7  -2  -2  143.68    8.25 
   7   2   2  130.36   19.29 
   7   2   2  139.84    8.48 
   7   2   2  163.14   13.26 
   7   2   2  159.82   19.55 
  -7  -2  -2  162.72   62.00 
   7   2   2   65.71   46.95 
  -8  -2  -2  175.41   10.55 
  -8  -2  -2  157.12   22.65 
  -8  -2  -2  186.03    8.83 
  -8  -2  -2  147.84   23.18 
   8   2   2  178.84   22.42 
   8   2   2  172.12    9.28 
   8   2   2  183.42   17.09 
   8   2   2  162.19   21.15 
  -8  -2  -2  322.60   93.25 
  -9  -2  -2   30.24    4.01 
  -9  -2  -2   23.77   18.75 
  -9  -2  -2   48.73   20.32 
  -9  -2  -2   32.90    3.41 
   9   2   2   60.86   13.74 
   9   2   2   51.46   17.05 
   9   2   2   27.54   12.56 
   9   2   2   42.42    4.92 
  -9  -2  -2   97.18   98.65 
   9   2   2    0.00   39.65 
 -10  -2  -2   11.85    3.88 
 -10  -2  -2   14.12   22.71 
 -10  -2  -2    3.33   19.83 
 -10  -2  -2    3.90    3.41 
  10   2   2   -5.18   17.21 
  10   2   2    6.79    9.66 
  10   2   2    0.58    4.10 
 -10  -2  -2   45.32  112.45 
  10   2   2  -84.70   64.99 
 -11  -2  -2   48.15   28.87 
 -11  -2  -2   42.75    5.12 
  11   2   2   53.09   17.76 
  11   2   2   47.69   17.78 
 -12  -2  -2    3.47    4.46 
  12   2   2   11.97   18.90 
  12   2   2   14.85   17.47 
  11  -3  -2   86.48   28.85 
  10  -3  -2   77.58   23.36 
  10  -3  -2   29.22   19.92 
 -10   3   2   23.14   10.63 
   9  -3  -2   -6.50   16.33 
   9  -3  -2    0.19    2.88 
   9  -3  -2   22.57   20.46 
   9  -3  -2   12.37   19.93 
  -9   3   2   13.62   29.19 
  -9   3   2  -18.16   21.50 
  -9   3   2    4.77    5.98 
   9  -3  -2   28.23  100.72 
  -9   3   2   47.69   78.13 
   8  -3  -2  410.57   41.31 
   8  -3  -2  476.84   37.46 
   8  -3  -2  434.84   36.81 
   8  -3  -2  437.95   23.69 
  -8   3   2  405.09   39.09 
  -8   3   2  439.85   41.82 
  -8   3   2  439.52   28.89 
   8  -3  -2  417.80   97.75 
  -8   3   2   15.68  147.24 
  -8   3   2  154.35   67.33 
   7  -3  -2  148.84   10.02 
   7  -3  -2  213.51   23.95 
   7  -3  -2  193.45   19.28 
   7  -3  -2  184.59   24.94 
  -7   3   2  124.46   23.40 
  -7   3   2  164.00   10.89 
  -7   3   2  119.00   22.02 
   7  -3  -2   88.60   56.37 
  -7   3   2  225.33  121.11 
  -7   3   2   65.98   69.87 
   6  -3  -2  180.81   20.55 
   6  -3  -2  202.33   18.84 
   6  -3  -2  186.25    9.57 
   6  -3  -2  183.14   23.58 
  -6   3   2  204.15   13.10 
  -6   3   2  248.14   22.95 
  -6   3   2  231.82   26.75 
   6  -3  -2  137.95   71.96 
  -6   3   2  174.40   74.55 
  -6   3   2  187.06   65.69 
   5  -3  -2  117.61   15.78 
   5  -3  -2  146.65   19.10 
   5  -3  -2  149.89   15.57 
   5  -3  -2  123.86    7.27 
  -5   3   2  118.14    8.08 
  -5   3   2  115.50   18.90 
  -5   3   2  119.32   17.16 
   5  -3  -2  136.32   48.60 
  -5   3   2   14.03   49.92 
  -5   3   2  136.06   55.19 
   4  -3  -2  787.13   44.85 
   4  -3  -2  868.74   54.76 
   4  -3  -2  828.79   60.19 
   4  -3  -2  865.38   62.87 
  -4   3   2  862.63   55.46 
  -4   3   2  829.24   61.39 
  -4   3   2  846.38   43.46 
   4  -3  -2  714.77   97.43 
  -4   3   2  784.51   93.13 
  -4   3   2  763.64  104.94 
   3  -3  -2    2.25    0.96 
   3  -3  -2   -1.07    4.44 
   3  -3  -2   -0.80   10.99 
   3  -3  -2  -17.19   13.87 
  -3   3   2   -1.83    3.46 
  -3   3   2   -5.57   11.61 
  -3   3   2    3.75   10.63 
   3  -3  -2  -12.04   39.66 
  -3   3   2  -46.03   38.61 
  -3   3   2   23.59   35.51 
   2  -3  -2 3967.92  247.43 
   2  -3  -2 3624.52  184.47 
   2  -3  -2 3749.40  286.43 
   2  -3  -2 3753.64  241.97 
  -2   3   2 3833.26  293.50 
  -2   3   2 3915.54  249.72 
  -2   3   2 3553.61  215.08 
   2  -3  -2 3486.38  386.91 
  -2   3   2 3647.34  402.90 
  -2   3   2 3849.08  452.23 
   1  -3  -2 2751.50  186.83 
   1  -3  -2 2783.03  178.42 
   1  -3  -2 2757.89  174.16 
   1  -3  -2 2723.81  189.89 
  -1   3   2 2955.45  187.24 
  -1   3   2 2778.34  188.89 
  -1   3   2 2815.45  150.48 
   1  -3  -2 2799.14  294.10 
  -1   3   2 2671.05  279.33 
   0  -3  -2  131.15    9.90 
   0  -3  -2  113.88    6.96 
   0  -3  -2  132.28   12.40 
   0  -3  -2  130.87    7.54 
   0  -3  -2  103.94   14.89 
   0   3   2  122.38   12.82 
   0   3   2  131.58   14.38 
   0   3   2  102.73    7.16 
   0  -3  -2  157.95   27.55 
   0   3   2  145.55   32.78 
  -1  -3  -2 5146.30  251.55 
  -1  -3  -2 5477.00  345.07 
  -1  -3  -2 5211.41  359.48 
   1   3   2 5343.71  486.63 
   1   3   2 5221.49  347.02 
   1   3   2 5417.50  259.76 
  -1  -3  -2 5940.89  617.18 
   1   3   2 5921.78  603.91 
  -2  -3  -2 4171.46  217.00 
  -2  -3  -2 4221.75  257.42 
  -2  -3  -2 4384.58  275.42 
   2   3   2 4125.63  188.12 
   2   3   2 4046.44  284.27 
   2   3   2 4194.22  341.64 
   2   3   2 4114.00  280.49 
  -2  -3  -2 4824.12  501.35 
  -3  -3  -2  289.08   14.18 
  -3  -3  -2  291.68   22.37 
  -3  -3  -2  307.61   22.00 
   3   3   2  304.24   13.86 
   3   3   2  295.72   23.37 
   3   3   2  322.23   22.34 
   3   3   2  294.99   19.84 
  -3  -3  -2  281.64   38.76 
  -4  -3  -2  485.58   34.14 
  -4  -3  -2  495.98   22.48 
  -4  -3  -2  521.37   36.07 
   4   3   2  511.97   24.44 
   4   3   2  504.09   33.30 
   4   3   2  467.60   35.44 
   4   3   2  508.37   36.66 
   4   3   2  502.75   31.45 
  -4  -3  -2  564.68   72.66 
  -5  -3  -2  919.08   44.25 
  -5  -3  -2 1009.47   82.72 
  -5  -3  -2  841.43   58.52 
   5   3   2  983.10   74.49 
   5   3   2  915.32   42.99 
   5   3   2  923.99   59.88 
   5   3   2  932.65   62.52 
  -5  -3  -2 1033.28  121.37 
   5   3   2  990.28  117.92 
  -6  -3  -2  154.79    7.76 
  -6  -3  -2  157.02    8.44 
  -6  -3  -2  166.91   18.94 
  -6  -3  -2  182.71   16.59 
   6   3   2  140.80    7.81 
   6   3   2  196.94   17.17 
   6   3   2  129.13   17.95 
   6   3   2  168.38   12.71 
  -6  -3  -2   87.14   39.04 
   6   3   2  124.15   35.84 
  -7  -3  -2  558.58   38.62 
  -7  -3  -2  552.86   24.83 
  -7  -3  -2  500.06   58.15 
  -7  -3  -2  511.87   28.49 
   7   3   2  505.50   37.72 
   7   3   2  536.63   28.15 
   7   3   2  597.77   42.48 
   7   3   2  529.00   45.89 
  -7  -3  -2  366.84   79.05 
   7   3   2  474.97   66.58 
  -8  -3  -2   73.72   18.72 
  -8  -3  -2   72.35    5.19 
  -8  -3  -2  103.59   15.87 
  -8  -3  -2   65.21    5.04 
   8   3   2   89.69   17.92 
   8   3   2   86.38   10.81 
   8   3   2   68.63    5.00 
   8   3   2   87.61   17.37 
  -8  -3  -2   88.68   70.15 
   8   3   2   80.91   45.13 
  -9  -3  -2    1.19    2.91 
  -9  -3  -2    7.89   17.30 
  -9  -3  -2  -19.65   16.85 
  -9  -3  -2    6.72    3.35 
   9   3   2   -4.46   14.87 
   9   3   2   20.80   15.91 
   9   3   2   12.25   11.56 
   9   3   2   10.72    4.01 
  -9  -3  -2  -66.36   82.30 
   9   3   2  -16.64   47.92 
 -10  -3  -2   13.98    4.00 
 -10  -3  -2    4.27    3.38 
 -10  -3  -2   43.59   22.12 
 -10  -3  -2    5.17   13.13 
  10   3   2    5.97    4.45 
  10   3   2   17.75   14.00 
  10   3   2   20.86   15.80 
  10   3   2    8.19   16.55 
 -10  -3  -2   83.90  106.90 
  10   3   2  -25.68   49.23 
 -11  -3  -2   11.05   24.44 
 -11  -3  -2   22.70    3.50 
 -11  -3  -2   28.96    4.76 
  11   3   2   21.62   15.61 
  11   3   2   31.45   16.75 
 -12  -3  -2   -2.54    3.15 
  12   3   2    1.70   16.02 
  12   3   2   29.88   18.64 
  10  -4  -2   10.45   20.44 
  10  -4  -2  -26.77   23.82 
 -10   4   2   -0.06    7.15 
   9  -4  -2  103.81   17.58 
   9  -4  -2  141.63   23.19 
  -9   4   2  119.79   10.73 
  -9   4   2   73.69   29.25 
   9  -4  -2  -98.81  111.22 
   8  -4  -2  165.26   18.54 
   8  -4  -2  228.18   25.69 
   8  -4  -2  151.28   30.00 
   8  -4  -2  159.46    9.52 
  -8   4   2  172.97   24.47 
  -8   4   2  131.03   31.18 
  -8   4   2  146.53   11.52 
   8  -4  -2  211.89  104.69 
  -8   4   2   19.20  148.37 
  -8   4   2  136.22   65.33 
   7  -4  -2   91.89   12.88 
   7  -4  -2   67.62   21.21 
   7  -4  -2  103.30   22.61 
   7  -4  -2   63.19    4.01 
  -7   4   2   66.08   21.84 
  -7   4   2   38.42   24.07 
  -7   4   2   62.34    8.02 
   7  -4  -2    1.84   83.41 
  -7   4   2 -119.44  116.90 
  -7   4   2   39.39   80.15 
   6  -4  -2  855.96   43.80 
   6  -4  -2  892.94   57.93 
   6  -4  -2  867.32   67.20 
   6  -4  -2  797.31   56.61 
  -6   4   2  730.02   56.41 
  -6   4   2  762.25   57.97 
  -6   4   2  858.52   49.49 
   6  -4  -2  613.75  107.57 
  -6   4   2  774.14  134.76 
  -6   4   2  688.85  115.95 
   5  -4  -2   89.03   12.60 
   5  -4  -2  102.15    5.47 
   5  -4  -2   93.39   16.45 
   5  -4  -2   89.44   19.75 
  -5   4   2   86.17   16.25 
  -5   4   2  108.59    7.32 
  -5   4   2  112.90   21.43 
   5  -4  -2  109.54   74.52 
  -5   4   2  118.32   49.44 
  -5   4   2  143.77   71.89 
   4  -4  -2  130.41    6.93 
   4  -4  -2  103.08   16.73 
   4  -4  -2  132.03   13.00 
   4  -4  -2  107.39   16.05 
  -4   4   2  162.23   20.98 
  -4   4   2  150.41   16.72 
  -4   4   2  140.49    8.80 
   4  -4  -2  220.83   58.33 
  -4   4   2  122.14   55.02 
  -4   4   2  188.85   46.90 
   3  -4  -2  474.05   34.60 
   3  -4  -2  476.30   34.88 
   3  -4  -2  443.68   23.94 
   3  -4  -2  512.51   35.55 
  -3   4   2  474.27   26.09 
  -3   4   2  490.79   34.99 
  -3   4   2  546.61   48.04 
   3  -4  -2  524.52   71.72 
  -3   4   2  531.39   68.25 
  -3   4   2  402.51   72.46 
   2  -4  -2  802.30   56.30 
   2  -4  -2  797.07   60.18 
   2  -4  -2  904.43   62.37 
   2  -4  -2  798.80   39.38 
  -2   4   2  739.27   54.23 
  -2   4   2  790.71   65.22 
  -2   4   2  844.69   43.03 
   2  -4  -2  636.05   89.85 
  -2   4   2  747.52   85.54 
   1  -4  -2  752.78   48.96 
   1  -4  -2  687.27   39.11 
   1  -4  -2  677.17   50.80 
   1  -4  -2  811.89   53.69 
   1  -4  -2  664.97   39.56 
  -1   4   2  716.81   39.52 
  -1   4   2  787.57   67.26 
  -1   4   2  713.79   51.47 
   1  -4  -2  791.94   85.24 
  -1   4   2  583.37   76.98 
   0  -4  -2  394.15   22.47 
   0  -4  -2  461.63   22.64 
   0  -4  -2  429.49   30.41 
   0  -4  -2  443.88   29.42 
   0  -4  -2  419.91   30.25 
   0   4   2  414.25   30.54 
   0   4   2  407.26   24.86 
   0   4   2  425.01   31.86 
   0  -4  -2  397.39   56.67 
   0   4   2  490.95   57.05 
  -1  -4  -2  185.18   17.91 
  -1  -4  -2  167.55    9.78 
  -1  -4  -2  177.80    8.81 
  -1  -4  -2  198.58   17.44 
  -1  -4  -2  182.78   12.95 
   1   4   2  162.91   18.53 
   1   4   2  182.06    8.48 
   1   4   2  202.46   16.50 
  -1  -4  -2  113.22   37.61 
   1   4   2  228.40   33.79 
  -2  -4  -2  620.19   30.35 
  -2  -4  -2  585.77   40.24 
  -2  -4  -2  542.28   42.22 
   2   4   2  687.41   45.84 
   2   4   2  593.41   28.62 
   2   4   2  641.59   39.95 
  -2  -4  -2  566.27   77.31 
   2   4   2  706.00   75.32 
  -3  -4  -2   20.20   10.76 
  -3  -4  -2    6.39    1.43 
  -3  -4  -2   -6.63    8.65 
   3   4   2  -15.24   11.71 
   3   4   2   21.92    8.70 
   3   4   2    8.41    2.04 
   3   4   2    8.53    3.54 
  -3  -4  -2   27.03   31.16 
  -4  -4  -2   17.86    9.23 
  -4  -4  -2   12.48    2.45 
  -4  -4  -2    1.35   10.61 
   4   4   2   14.15    2.58 
   4   4   2   14.05    8.67 
   4   4   2   18.39    4.74 
   4   4   2   13.69    1.85 
   4   4   2   -0.02   11.73 
  -4  -4  -2   30.52   23.14 
  -4  -4  -2   43.49   31.94 
  -5  -4  -2  455.57   43.19 
  -5  -4  -2  582.66   27.00 
  -5  -4  -2  643.50   41.85 
   5   4   2  568.29   39.47 
   5   4   2  585.36   39.32 
   5   4   2  603.16   26.99 
   5   4   2  566.61   33.50 
   5   4   2  555.35   48.97 
  -5  -4  -2  483.18   71.10 
  -6  -4  -2  127.11    6.54 
  -6  -4  -2  136.92   17.20 
  -6  -4  -2  134.82   17.25 
   6   4   2  144.69   17.37 
   6   4   2  128.28   12.02 
   6   4   2  131.03   17.70 
   6   4   2  118.52    6.69 
  -6  -4  -2   52.46   50.18 
  -7  -4  -2  329.76   27.31 
  -7  -4  -2  354.28   17.28 
  -7  -4  -2  369.15   29.91 
   7   4   2  333.36   24.93 
   7   4   2  345.92   22.95 
   7   4   2  416.94   30.42 
   7   4   2  369.19   28.97 
  -7  -4  -2  280.14   56.45 
  -8  -4  -2  410.88   20.48 
  -8  -4  -2  460.29   35.05 
  -8  -4  -2  403.08   34.84 
   8   4   2  386.54   22.45 
   8   4   2  447.19   37.74 
   8   4   2  458.32   35.64 
   8   4   2  421.65   30.56 
  -8  -4  -2  511.55   95.57 
  -9  -4  -2   12.24   16.79 
  -9  -4  -2   35.89   18.69 
  -9  -4  -2   37.30    4.22 
  -9  -4  -2   25.08    3.26 
   9   4   2   32.62    9.87 
   9   4   2   36.53    4.76 
   9   4   2   50.67   17.48 
   9   4   2   37.29   12.51 
  -9  -4  -2   37.06   75.43 
 -10  -4  -2    2.40    2.53 
 -10  -4  -2   -7.61   18.54 
 -10  -4  -2   14.61   19.70 
 -10  -4  -2   15.26    3.08 
  10   4   2   -2.28   17.67 
  10   4   2   18.24   10.23 
  10   4   2    3.66    4.54 
  10   4   2   14.14   11.20 
 -10  -4  -2   40.19   70.59 
 -11  -4  -2   16.53   20.14 
 -11  -4  -2    7.28    4.36 
  11   4   2    5.96   11.06 
  11   4   2   14.09   16.57 
 -12  -4  -2    4.52    3.63 
  12   4   2    9.93   14.95 
  12   4   2    9.05   12.94 
  10  -5  -2   12.90   26.82 
  10  -5  -2   46.45   17.84 
 -10   5   2   31.37    8.73 
   9  -5  -2    3.04   16.66 
   9  -5  -2   10.01   17.65 
  -9   5   2    2.78    9.35 
   8  -5  -2  441.42   49.41 
   8  -5  -2  519.38   32.60 
   8  -5  -2  628.60   46.63 
   8  -5  -2  560.49   54.63 
  -8   5   2  539.83   35.97 
  -8   5   2  550.17   47.17 
   8  -5  -2  313.67   92.78 
  -8   5   2    0.00   63.73 
   7  -5  -2  903.89   63.44 
   7  -5  -2  800.53   74.25 
   7  -5  -2  851.55   48.29 
   7  -5  -2  920.00   63.45 
  -7   5   2  776.94   69.40 
  -7   5   2  771.65   62.22 
  -7   5   2  822.72   52.79 
  -7   5   2  280.28  127.12 
  -7   5   2  499.34  138.15 
   6  -5  -2   30.02   15.30 
   6  -5  -2    9.61    8.07 
   6  -5  -2    9.57    1.91 
   6  -5  -2   15.29   14.55 
  -6   5   2   10.89   14.46 
  -6   5   2   22.62   15.97 
  -6   5   2   19.69    4.59 
   6  -5  -2   73.93   68.07 
  -6   5   2   -6.16   55.36 
  -6   5   2  -95.80   93.72 
   5  -5  -2  115.05   11.42 
   5  -5  -2   93.36   17.66 
   5  -5  -2   82.61    4.96 
   5  -5  -2  114.24   22.05 
  -5   5   2   98.13   19.16 
  -5   5   2  124.88   18.63 
  -5   5   2   76.07    7.72 
   5  -5  -2   80.78   84.70 
  -5   5   2   70.61   50.18 
  -5   5   2  -31.85   63.01 
   4  -5  -2   42.32   13.79 
   4  -5  -2   18.00    8.28 
   4  -5  -2   15.07   16.48 
   4  -5  -2   13.56    1.28 
  -4   5   2   17.19   15.01 
  -4   5   2   13.36    4.73 
  -4   5   2    6.05   16.44 
   4  -5  -2  -47.73   73.60 
  -4   5   2   13.69   59.24 
  -4   5   2  -29.23   39.74 
   3  -5  -2  187.72   22.88 
   3  -5  -2  230.37   17.16 
   3  -5  -2  228.65   25.41 
   3  -5  -2  193.62    9.54 
  -3   5   2  183.23   20.83 
  -3   5   2  221.85   22.65 
  -3   5   2  196.37   11.15 
   3  -5  -2  190.45   64.39 
  -3   5   2   96.81   43.97 
  -3   5   2  199.78   52.84 
   2  -5  -2    3.82    5.35 
   2  -5  -2   -8.21    9.64 
   2  -5  -2   12.63   15.77 
  -2   5   2   30.32   15.93 
  -2   5   2    0.68    2.35 
  -2   5   2   -6.13    9.19 
   2  -5  -2   22.05   32.65 
  -2   5   2  -13.42   44.11 
   1  -5  -2   88.53   12.72 
   1  -5  -2  106.72   15.48 
   1  -5  -2   75.53    5.28 
  -1   5   2   82.00   12.94 
  -1   5   2   79.77    5.47 
  -1   5   2   87.28   14.06 
   1  -5  -2   22.39   31.02 
  -1   5   2   24.90   27.87 
   0  -5  -2    3.41    1.00 
   0  -5  -2    3.60    2.32 
   0  -5  -2    5.20   12.20 
   0  -5  -2  -14.72   10.45 
   0   5   2   14.37    9.66 
   0   5   2    9.49   13.41 
   0   5   2    5.12    1.65 
   0  -5  -2  -37.37   37.26 
   0  -5  -2   22.36   10.52 
   0   5   2   14.70   24.84 
  -1  -5  -2 2200.08  110.13 
  -1  -5  -2 2300.07  154.98 
  -1  -5  -2 2396.63  148.55 
  -1  -5  -2 2445.83  129.44 
   1   5   2 2405.75  189.91 
   1   5   2 2313.46  152.12 
  -1  -5  -2 2394.22  265.78 
   1   5   2 2362.62  248.24 
  -2  -5  -2 1876.80  141.40 
  -2  -5  -2 2031.20   95.67 
  -2  -5  -2 1967.83  123.57 
  -2  -5  -2 1948.63  155.31 
   2   5   2 1866.42  128.43 
   2   5   2 2020.18  108.60 
   2   5   2 2090.87  133.61 
  -2  -5  -2 2070.89  220.86 
   2   5   2 2165.84  225.78 
  -3  -5  -2  158.36   16.02 
  -3  -5  -2  179.70   21.27 
  -3  -5  -2  167.03    7.83 
   3   5   2  171.40   16.73 
   3   5   2  184.59   18.76 
   3   5   2  149.04    7.68 
  -3  -5  -2  191.60   33.93 
   3   5   2   20.80   25.68 
  -4  -5  -2  357.13   28.98 
  -4  -5  -2  299.19   24.88 
  -4  -5  -2  309.81   15.11 
   4   5   2  280.03   14.52 
   4   5   2  303.12   25.90 
   4   5   2  317.07   23.96 
   4   5   2  317.92   24.32 
   4   5   2  303.25   17.85 
  -4  -5  -2  313.55   54.83 
  -5  -5  -2 1323.94   60.33 
  -5  -5  -2 1303.10   80.09 
  -5  -5  -2 1397.30  117.52 
   5   5   2 1189.80   88.31 
   5   5   2 1425.62   63.68 
   5   5   2 1355.00   81.39 
   5   5   2 1148.70   82.05 
   5   5   2 1311.08   91.41 
  -5  -5  -2 1435.47  159.98 
  -5  -5  -2 1394.75  153.91 
  -6  -5  -2    6.95    2.08 
  -6  -5  -2    7.64    8.78 
  -6  -5  -2   28.17   13.61 
   6   5   2   10.05    9.57 
   6   5   2    4.47   12.42 
   6   5   2    6.71    3.18 
   6   5   2    3.27    7.00 
   6   5   2    6.19    2.45 
  -6  -5  -2   95.69   49.54 
  -6  -5  -2   79.92   32.52 
  -7  -5  -2  165.56    8.17 
  -7  -5  -2  166.56   20.20 
  -7  -5  -2  121.29   18.66 
   7   5   2  143.70   15.03 
   7   5   2  153.38   20.74 
   7   5   2  139.29    8.54 
   7   5   2  157.12   20.16 
  -7  -5  -2  188.35   64.26 
  -7  -5  -2   54.77   33.05 
  -8  -5  -2   12.42   14.93 
  -8  -5  -2    7.06    3.40 
  -8  -5  -2   26.77   14.56 
   8   5   2    1.67   16.86 
   8   5   2    1.44    3.78 
   8   5   2   10.37   11.46 
   8   5   2   17.99   15.24 
  -8  -5  -2  -17.55   62.12 
  -9  -5  -2  249.33   33.92 
  -9  -5  -2  299.89   14.96 
  -9  -5  -2  217.95   31.41 
   9   5   2  311.91   36.99 
   9   5   2  309.30   26.80 
   9   5   2  298.99   18.61 
   9   5   2  328.50   31.50 
  -9  -5  -2  185.01   83.89 
 -10  -5  -2  450.78   21.61 
 -10  -5  -2  380.78   39.60 
 -10  -5  -2  365.52   37.71 
  10   5   2  477.64   41.01 
  10   5   2  445.64   34.69 
  10   5   2  503.30   52.17 
  10   5   2  397.19   31.47 
 -10  -5  -2  341.30  100.02 
 -11  -5  -2    0.06    3.00 
 -11  -5  -2    7.40   18.44 
  11   5   2   -7.96   15.25 
  11   5   2  -14.18   15.09 
 -11  -5  -2   77.59   53.92 
 -12  -5  -2   -0.36    5.20 
  12   5   2   -7.71   17.85 
 -12  -5  -2  -48.35   77.39 
   9  -6  -2  251.55   33.10 
  -9   6   2  231.28   18.28 
   8  -6  -2  -12.16   17.17 
   8  -6  -2    1.29   15.34 
   8  -6  -2   -6.92   18.44 
  -8   6   2    0.28    8.29 
  -8   6   2    3.44   20.65 
   8  -6  -2  -46.56   95.27 
  -8   6   2   21.23   75.90 
   7  -6  -2   41.30   25.91 
   7  -6  -2   28.50    2.62 
   7  -6  -2   45.01   24.49 
   7  -6  -2   37.97   10.93 
  -7   6   2   28.90    7.58 
  -7   6   2   50.01   22.90 
  -7   6   2   31.40   26.17 
   7  -6  -2   96.14   86.08 
  -7   6   2   70.96  111.05 
  -7   6   2  -45.24   98.31 
   6  -6  -2   27.72   12.40 
   6  -6  -2    4.24   15.54 
   6  -6  -2   38.41    2.80 
   6  -6  -2   11.78   21.90 
  -6   6   2   25.37   17.52 
  -6   6   2   -6.88   22.85 
  -6   6   2   36.97    6.98 
   6  -6  -2   33.58  113.42 
  -6   6   2  131.52  107.18 
  -6   6   2   -6.34   66.87 
   5  -6  -2   21.36   14.84 
   5  -6  -2   14.54   14.33 
   5  -6  -2   15.37    1.63 
   5  -6  -2    6.73    9.40 
  -5   6   2   15.97    4.22 
  -5   6   2   -2.18   13.95 
   5  -6  -2   82.46   93.40 
  -5   6   2  -39.62   61.61 
  -5   6   2   -3.09   55.47 
   4  -6  -2  273.44   13.50 
   4  -6  -2  255.76   20.58 
   4  -6  -2  282.98   27.97 
   4  -6  -2  255.97   43.59 
  -4   6   2  306.07   15.59 
  -4   6   2  272.07   28.23 
  -4   6   2  273.54   26.18 
   4  -6  -2  375.20   79.02 
  -4   6   2  188.18   64.29 
  -4   6   2  280.59   66.68 
   3  -6  -2   72.40    8.12 
   3  -6  -2   73.05    3.66 
   3  -6  -2  114.47   17.71 
   3  -6  -2   72.21   15.01 
  -3   6   2   63.72   15.64 
  -3   6   2   63.79   14.00 
  -3   6   2   76.29    5.64 
   3  -6  -2   55.64   50.18 
  -3   6   2   15.66   43.81 
   2  -6  -2  119.66   17.67 
   2  -6  -2   69.74   17.84 
  -2   6   2  130.92   19.44 
  -2   6   2   86.62    5.95 
  -2   6   2   77.02   15.98 
   2  -6  -2   57.45   55.20 
  -2   6   2   77.80   39.45 
   1  -6  -2  146.62   20.00 
   1  -6  -2  179.06   10.67 
   1  -6  -2  157.27   18.28 
  -1   6   2  173.24    9.65 
  -1   6   2  170.34   19.57 
  -1   6   2  207.50   19.73 
   1  -6  -2  215.78   46.61 
  -1   6   2   84.82   38.21 
   0  -6  -2   47.66    2.94 
   0  -6  -2  174.35  121.91 
   0  -6  -2   51.22   13.97 
   0  -6  -2   46.79    3.47 
   0   6   2   29.28   11.78 
   0   6   2   96.96  116.01 
   0   6   2   53.80    3.85 
   0  -6  -2   44.02   35.16 
   0   6   2   28.60   30.73 
  -1  -6  -2  877.20   44.89 
  -1  -6  -2  859.74   63.72 
  -1  -6  -2  912.63   51.06 
  -1  -6  -2  829.70   68.37 
   1   6   2  822.44   71.21 
   1   6   2  866.98  121.99 
  -1  -6  -2  974.15  112.60 
   1   6   2  809.98  102.29 
  -2  -6  -2 2707.26  237.08 
  -2  -6  -2 3330.51  256.66 
  -2  -6  -2 3078.65  150.99 
   2   6   2 3256.27  209.16 
   2   6   2 3187.79  227.86 
  -2  -6  -2 3444.13  344.13 
   2   6   2 2901.16  327.42 
  -3  -6  -2  909.18   69.65 
  -3  -6  -2  937.65   65.95 
  -3  -6  -2  985.51   65.37 
  -3  -6  -2  962.32   45.02 
   3   6   2 1039.28   47.46 
   3   6   2 1022.48   62.55 
   3   6   2  917.77   63.05 
  -3  -6  -2 1063.62  115.72 
   3   6   2  951.18  117.58 
  -4  -6  -2   80.84   12.67 
  -4  -6  -2   76.35    4.20 
  -4  -6  -2   86.08   18.01 
   4   6   2   64.67    4.60 
   4   6   2   58.85   12.48 
   4   6   2   73.86   17.66 
  -4  -6  -2  112.57   37.07 
  -5  -6  -2  634.49   45.09 
  -5  -6  -2  599.86   27.70 
  -5  -6  -2  541.26   45.30 
   5   6   2  585.10   31.54 
   5   6   2  593.41   40.94 
   5   6   2  605.26   41.81 
   5   6   2  608.22   27.74 
   5   6   2  549.02   36.96 
  -5  -6  -2  375.29   57.67 
  -6  -6  -2   14.14    3.28 
  -6  -6  -2   21.72   10.39 
  -6  -6  -2   51.47   15.48 
   6   6   2   18.32    2.58 
   6   6   2   17.20    7.62 
   6   6   2   -8.90   13.91 
   6   6   2   26.17   11.17 
   6   6   2   19.99    3.55 
  -6  -6  -2    7.16   30.13 
  -6  -6  -2  -18.75   46.51 
  -7  -6  -2   23.09  125.86 
  -7  -6  -2   26.77    3.73 
  -7  -6  -2    8.59   13.22 
   7   6   2   21.27    6.73 
   7   6   2    3.41   14.12 
   7   6   2   18.44    3.22 
   7   6   2   14.98    3.87 
   7   6   2   11.01   14.54 
  -7  -6  -2  -52.22   45.51 
  -7  -6  -2   93.17   59.80 
  -8  -6  -2   74.07    4.87 
  -8  -6  -2   62.62   16.84 
  -8  -6  -2   41.12   15.65 
   8   6   2   59.68   18.98 
   8   6   2   73.31    5.91 
   8   6   2   67.52   16.98 
   8   6   2   77.25   12.69 
  -8  -6  -2  -35.86   48.93 
  -8  -6  -2   80.02   66.17 
  -9  -6  -2  126.11   18.25 
  -9  -6  -2   91.24   20.59 
  -9  -6  -2  111.51    9.32 
   9   6   2  157.35   21.52 
   9   6   2  128.02   16.74 
   9   6   2  132.99    9.20 
   9   6   2  134.37   21.22 
  -9  -6  -2   49.51   58.69 
  -9  -6  -2  194.25   77.69 
 -10  -6  -2    4.16   17.90 
 -10  -6  -2   36.92   19.67 
 -10  -6  -2   20.72    3.65 
  10   6   2   11.73   16.19 
  10   6   2   19.85   10.35 
  10   6   2    7.13   15.61 
 -10  -6  -2   -1.49   60.20 
 -10  -6  -2   18.77   82.83 
 -11  -6  -2   22.99    3.86 
 -11  -6  -2   -3.91   19.65 
  11   6   2   24.17   39.68 
  11   6   2   20.17   16.07 
 -11  -6  -2   35.36   75.40 
 -12  -6  -2   19.63    5.69 
  12   6   2   21.41   18.50 
  12   6   2   21.50   15.75 
 -12  -6  -2   44.87   79.85 
   9  -7  -2   16.00   22.83 
   9  -7  -2   26.66   19.85 
  -9   7   2   12.04    7.39 
   8  -7  -2   -7.35   11.21 
   8  -7  -2    1.66   19.88 
  -8   7   2    7.13   22.44 
  -8   7   2    5.92    6.14 
   8  -7  -2   54.82  161.59 
  -8   7   2  -36.26   76.61 
   7  -7  -2   45.47    3.57 
   7  -7  -2   63.48   12.63 
   7  -7  -2   39.73   28.17 
   7  -7  -2   44.46   28.08 
  -7   7   2   50.78    8.11 
  -7   7   2   37.63   30.12 
   7  -7  -2  266.50  155.18 
  -7   7   2   -8.10  102.81 
   6  -7  -2  113.85   22.75 
   6  -7  -2  108.31   22.84 
   6  -7  -2   92.74   15.36 
   6  -7  -2  103.38    6.76 
  -6   7   2   74.99   22.78 
  -6   7   2   98.91    9.37 
  -6   7   2  141.60   26.31 
   6  -7  -2   82.41   85.43 
  -6   7   2   19.48   94.23 
  -6   7   2  -22.19   72.31 
   5  -7  -2  206.51   26.59 
   5  -7  -2  184.96   11.52 
   5  -7  -2  189.74   17.91 
   5  -7  -2  225.35   26.73 
  -5   7   2  212.00   27.19 
  -5   7   2  170.56   12.06 
   5  -7  -2  154.52   85.97 
  -5   7   2  103.38   71.43 
   4  -7  -2  287.66   15.47 
   4  -7  -2  298.10   29.96 
   4  -7  -2  328.91   22.16 
   4  -7  -2  329.35   33.48 
  -4   7   2  311.67   17.61 
  -4   7   2  349.78   30.06 
  -4   7   2  273.46   30.80 
   4  -7  -2  238.69   79.59 
  -4   7   2  290.78   74.19 
   3  -7  -2  631.59   30.06 
   3  -7  -2  707.70   49.84 
   3  -7  -2  562.34   45.82 
   3  -7  -2  655.11   48.17 
  -3   7   2  643.11   45.94 
  -3   7   2  625.94   31.52 
  -3   7   2  597.37   47.50 
   3  -7  -2  542.22   94.16 
  -3   7   2  588.36   90.98 
   2  -7  -2  748.29   54.28 
   2  -7  -2  773.02   53.12 
  -2   7   2  773.24   38.38 
  -2   7   2  738.29   58.24 
  -2   7   2  780.35   59.94 
   2  -7  -2  744.88  110.54 
  -2   7   2  905.79  110.37 
   1  -7  -2  204.55   10.60 
   1  -7  -2  271.57   28.97 
   1  -7  -2  216.83   22.18 
   1  -7  -2  210.59   12.70 
  -1   7   2  228.55   22.47 
  -1   7   2  202.02   11.52 
  -1   7   2  207.25   26.07 
   1  -7  -2  140.76   52.58 
  -1   7   2  206.97   62.55 
   0  -7  -2    0.94   12.47 
   0  -7  -2   15.27   11.36 
   0  -7  -2    3.68    2.62 
   0   7   2   -3.11   11.49 
   0   7   2   -0.86   10.33 
   0  -7  -2   14.10   37.10 
   0   7   2    8.84   34.35 
  -1  -7  -2   75.02    4.94 
  -1  -7  -2   90.34   17.74 
  -1  -7  -2   75.26    4.44 
  -1  -7  -2  118.76   17.61 
   1   7   2   80.06   14.63 
   1   7   2   82.49   18.07 
  -1  -7  -2  169.40   56.24 
  -1  -7  -2   95.44   43.55 
   1   7   2   91.85   38.94 
  -2  -7  -2  543.13   24.96 
  -2  -7  -2  478.62   39.99 
  -2  -7  -2  595.79   30.82 
  -2  -7  -2  565.24   42.39 
   2   7   2  567.72   40.58 
   2   7   2  488.11   43.53 
  -2  -7  -2  645.49   85.44 
   2   7   2  456.08   80.13 
  -3  -7  -2  638.06   48.64 
  -3  -7  -2  623.47   29.80 
  -3  -7  -2  634.17   46.50 
  -3  -7  -2  619.75   51.72 
   3   7   2  650.03   45.26 
   3   7   2  646.70   46.19 
  -3  -7  -2  721.22   90.86 
   3   7   2  562.84   89.03 
  -4  -7  -2   -0.69    1.70 
  -4  -7  -2  -21.87   16.27 
  -4  -7  -2   -2.07   14.03 
   4   7   2   -2.67   14.27 
   4   7   2   -7.80   13.60 
   4   7   2    2.24    1.87 
  -4  -7  -2  -15.99   44.63 
   4   7   2   33.27   32.72 
  -5  -7  -2 1612.76   70.84 
  -5  -7  -2 1582.38   96.69 
  -5  -7  -2 1522.85   96.63 
   5   7   2 1570.36   74.87 
   5   7   2 1626.65   86.44 
   5   7   2 1510.99  103.71 
   5   7   2 1485.54   96.93 
  -5  -7  -2 1487.76  164.62 
  -6  -7  -2 2265.60  178.22 
  -6  -7  -2 2449.68  114.05 
  -6  -7  -2 2311.21  153.39 
   6   7   2 2390.13  150.65 
   6   7   2 2376.63  157.30 
   6   7   2 2404.82  160.33 
   6   7   2 2415.25  118.53 
  -6  -7  -2 2338.44  244.78 
  -6  -7  -2 2023.79  246.69 
  -7  -7  -2  715.85   61.03 
  -7  -7  -2  742.24   63.97 
  -7  -7  -2  688.32   34.13 
   7   7   2  663.72   38.36 
   7   7   2  739.17   45.45 
   7   7   2  675.33   74.32 
   7   7   2  611.92   43.75 
   7   7   2  683.93   50.74 
  -7  -7  -2  561.19   90.75 
  -7  -7  -2  710.52   98.81 
  -8  -7  -2   80.12   17.58 
  -8  -7  -2   79.46   15.25 
  -8  -7  -2   77.60    5.12 
   8   7   2   69.70   12.55 
   8   7   2   83.62   17.13 
   8   7   2   60.91   17.68 
   8   7   2   56.82    5.89 
  -8  -7  -2   32.37   48.10 
  -8  -7  -2   80.58   55.49 
  -9  -7  -2  288.57   27.33 
  -9  -7  -2  334.14   17.38 
  -9  -7  -2  294.60   39.75 
   9   7   2  328.25   26.43 
   9   7   2  346.59   30.60 
   9   7   2  320.40   28.30 
   9   7   2  299.81   17.88 
  -9  -7  -2  234.59   69.81 
  -9  -7  -2  291.80   89.64 
 -10  -7  -2  485.49   26.14 
 -10  -7  -2  341.67   41.09 
 -10  -7  -2  431.41   49.58 
  10   7   2  446.98   62.60 
  10   7   2  498.94   37.17 
  10   7   2  504.52   38.72 
 -10  -7  -2  659.45   95.44 
 -10  -7  -2  336.58  103.62 
 -11  -7  -2    0.18    4.62 
 -11  -7  -2    6.79   18.06 
  11   7   2    3.95   15.39 
  11   7   2    4.95   16.88 
 -11  -7  -2  -35.10   64.37 
 -12  -7  -2   14.83    5.79 
  12   7   2   17.91   12.98 
  12   7   2   13.84   16.27 
   8  -8  -2   21.09   23.12 
   8  -8  -2   37.57   13.71 
  -8   8   2   -3.37   23.21 
  -8   8   2    8.61    8.87 
   8  -8  -2   96.74  131.93 
   7  -8  -2  243.21   23.13 
   7  -8  -2  233.55   39.32 
   7  -8  -2  269.93   40.21 
  -7   8   2  233.49   46.24 
  -7   8   2  288.26   43.48 
   7  -8  -2  -74.99  163.53 
  -7   8   2  161.91  125.75 
   6  -8  -2   44.67    2.96 
   6  -8  -2   33.49   13.25 
   6  -8  -2   25.76   27.21 
   6  -8  -2  105.51   24.48 
  -6   8   2   59.35    6.62 
  -6   8   2   56.94   22.73 
   6  -8  -2   30.05  149.73 
  -6   8   2  -12.77   74.19 
   5  -8  -2    4.81   10.14 
   5  -8  -2   27.14   19.10 
   5  -8  -2   12.10   17.07 
   5  -8  -2   21.01    1.48 
  -5   8   2   26.50    6.28 
  -5   8   2   12.01   18.13 
   5  -8  -2 -103.05   80.86 
  -5   8   2   31.03   72.12 
   4  -8  -2  102.47   10.78 
   4  -8  -2   85.46    5.02 
   4  -8  -2   89.86   21.78 
   4  -8  -2   70.71   19.15 
  -4   8   2   81.82    6.83 
  -4   8   2   83.84   18.19 
  -4   8   2   85.17   21.24 
   4  -8  -2  108.29  105.45 
  -4   8   2    8.97   61.72 
   3  -8  -2   15.51    1.31 
   3  -8  -2    5.66   23.19 
   3  -8  -2   16.10   19.71 
   3  -8  -2    7.72    7.47 
  -3   8   2   35.02   33.73 
  -3   8   2   11.96    4.72 
  -3   8   2   30.68   18.40 
   3  -8  -2   48.67   84.96 
  -3   8   2  -56.38   74.30 
   2  -8  -2 1102.14   72.56 
   2  -8  -2 1041.81   84.78 
  -2   8   2 1118.36   65.20 
  -2   8   2 1092.99   86.78 
  -2   8   2 1076.89   76.60 
   2  -8  -2  830.48  117.83 
  -2   8   2  800.01  122.67 
   1  -8  -2  919.95   50.87 
   1  -8  -2 1026.94   76.81 
   1  -8  -2  914.63   69.00 
  -1   8   2  938.62   68.96 
  -1   8   2  977.46   56.76 
  -1   8   2 1047.15   74.42 
   1  -8  -2  867.19  125.26 
  -1   8   2 1041.21  123.96 
   0  -8  -2  302.77   19.24 
   0  -8  -2  286.64   26.63 
   0  -8  -2  286.73   14.16 
   0  -8  -2  276.29   29.06 
   0   8   2  284.04   27.71 
   0   8   2  300.08   27.24 
   0  -8  -2  323.56   68.88 
   0   8   2  347.03   64.52 
  -1  -8  -2  215.20   10.93 
  -1  -8  -2  194.08   10.78 
  -1  -8  -2  220.36   25.55 
  -1  -8  -2  212.20   27.98 
   1   8   2  171.30   24.19 
   1   8   2  235.15   26.06 
  -1  -8  -2  120.45   67.07 
  -1  -8  -2  197.58   58.86 
   1   8   2  154.18   60.56 
  -2  -8  -2   -5.68   18.77 
  -2  -8  -2   -6.94   14.92 
  -2  -8  -2   -0.10    1.91 
  -2  -8  -2   -2.67    2.04 
   2   8   2   -4.82   17.02 
   2   8   2   18.35   16.20 
  -2  -8  -2   69.14   57.78 
  -2  -8  -2  -35.36   34.56 
   2   8   2   27.67   53.95 
  -3  -8  -2   11.90   11.40 
  -3  -8  -2   21.69    3.15 
  -3  -8  -2   29.10    2.96 
  -3  -8  -2    0.97   18.08 
   3   8   2   22.39   16.18 
   3   8   2   25.61   11.80 
  -3  -8  -2   52.64   39.41 
   3   8   2   91.36   56.23 
  -4  -8  -2  102.97   18.85 
  -4  -8  -2   80.19   20.53 
  -4  -8  -2   90.83    5.03 
  -4  -8  -2   82.69    6.42 
   4   8   2   87.17   18.75 
   4   8   2   92.04   18.90 
  -4  -8  -2   19.59   51.21 
   4   8   2   60.29   39.03 
  -5  -8  -2   15.63   18.72 
  -5  -8  -2   56.42    3.86 
  -5  -8  -2   55.78   17.04 
   5   8   2   49.80    4.22 
   5   8   2   40.64   16.24 
   5   8   2   56.39   18.33 
  -5  -8  -2   36.29   50.97 
  -6  -8  -2  364.17   32.83 
  -6  -8  -2  338.97   16.37 
  -6  -8  -2  339.88   30.59 
   6   8   2  348.36   31.20 
   6   8   2  340.00   20.93 
   6   8   2  343.00   32.58 
  -6  -8  -2  192.27   64.18 
  -6  -8  -2  394.71   66.54 
  -7  -8  -2  595.75   28.27 
  -7  -8  -2  560.50   42.50 
  -7  -8  -2  556.84   42.52 
   7   8   2  544.38   41.59 
   7   8   2  578.36   43.70 
   7   8   2  651.75   64.87 
   7   8   2  550.46   33.03 
  -7  -8  -2  567.65   86.06 
  -7  -8  -2  465.12   90.81 
  -8  -8  -2  133.25   22.37 
  -8  -8  -2  170.32    8.62 
  -8  -8  -2  120.10   21.23 
   8   8   2  174.27   22.79 
   8   8   2  197.62   23.06 
   8   8   2  142.63    9.43 
   8   8   2  155.50   12.73 
  -8  -8  -2  125.40   62.43 
  -8  -8  -2  178.47   74.94 
  -9  -8  -2   44.34   13.72 
  -9  -8  -2   11.54   16.92 
  -9  -8  -2   34.79    5.00 
   9   8   2   43.54    4.81 
   9   8   2   20.44   16.55 
   9   8   2   32.11   12.64 
   9   8   2   29.50    8.88 
  -9  -8  -2    9.90   62.33 
  -9  -8  -2   -3.58   53.42 
 -10  -8  -2    5.99    3.34 
 -10  -8  -2    1.92   17.20 
 -10  -8  -2    6.68   17.07 
  10   8   2   17.50    9.92 
  10   8   2    9.17   16.86 
  10   8   2   -6.20   16.06 
 -10  -8  -2   81.29   66.93 
 -10  -8  -2   28.27   93.71 
 -11  -8  -2   -8.27   20.14 
 -11  -8  -2    3.16    5.18 
  11   8   2   21.02   11.59 
  11   8   2   13.18   16.84 
 -11  -8  -2   46.68   63.69 
 -12  -8  -2   85.26    8.11 
  12   8   2  108.31   17.45 
  12   8   2   97.62   20.51 
   8  -9  -2   20.39   18.50 
   8  -9  -2   42.47   27.55 
  -8   9   2   34.85    7.79 
   7  -9  -2  249.07   23.07 
   7  -9  -2  196.41   37.43 
   7  -9  -2  179.21   34.08 
  -7   9   2  183.18   42.37 
  -7   9   2  239.82   16.73 
  -7   9   2  236.69  111.88 
   6  -9  -2  613.58   82.65 
   6  -9  -2  697.27   53.02 
   6  -9  -2  856.14   61.92 
  -6   9   2  610.91   48.95 
  -6   9   2  678.84   63.06 
   6  -9  -2  168.49  159.08 
  -6   9   2  634.17  129.92 
   5  -9  -2  204.53   19.55 
   5  -9  -2  188.67   30.94 
   5  -9  -2  166.20   28.59 
   5  -9  -2  196.30   12.01 
  -5   9   2  206.66   13.92 
  -5   9   2  182.03   30.26 
   5  -9  -2  105.92  105.29 
  -5   9   2  196.28   88.16 
   4  -9  -2  123.85   28.24 
   4  -9  -2  125.62   25.28 
   4  -9  -2   90.54    5.68 
   4  -9  -2  107.26   11.47 
  -4   9   2   66.56   24.16 
  -4   9   2   86.97    8.07 
  -4   9   2   72.40   22.23 
   4  -9  -2  217.18  133.02 
  -4   9   2  185.84   79.36 
   3  -9  -2  455.93   47.72 
   3  -9  -2  391.59   37.29 
   3  -9  -2  445.47   35.12 
  -3   9   2  399.89   27.61 
  -3   9   2  385.86   36.05 
  -3   9   2  404.76   43.66 
   3  -9  -2  322.50   92.87 
  -3   9   2  447.10  107.65 
   2  -9  -2   -9.30   20.04 
   2  -9  -2   20.90   25.66 
   2  -9  -2   14.25    1.68 
  -2   9   2   25.41   19.98 
  -2   9   2   22.87   22.83 
  -2   9   2   19.81    4.20 
   2  -9  -2  -16.33   86.55 
  -2   9   2  -28.46   78.19 
   1  -9  -2  720.44   58.58 
   1  -9  -2  719.18   41.29 
   1  -9  -2  736.41   64.39 
  -1   9   2  699.76   53.03 
  -1   9   2  769.08   37.36 
  -1   9   2  838.11   62.15 
   1  -9  -2  675.93  112.67 
  -1   9   2  898.56  126.20 
   0  -9  -2 1647.57  109.70 
   0  -9  -2 1517.32   93.10 
   0  -9  -2 1797.32  107.13 
   0  -9  -2 1564.40   81.89 
   0   9   2 1526.07  155.60 
   0   9   2 1654.44  104.87 
   0  -9  -2 1592.13  228.82 
   0   9   2 1816.27  205.51 
  -1  -9  -2   13.68   21.40 
  -1  -9  -2    3.32    2.64 
  -1  -9  -2    7.93    2.12 
  -1  -9  -2   -7.56   12.39 
   1   9   2    6.57   12.42 
   1   9   2    4.28   18.24 
  -1  -9  -2 -107.23   47.67 
   1   9   2  -38.62   61.94 
  -2  -9  -2  156.80   22.54 
  -2  -9  -2  131.14    7.19 
  -2  -9  -2  157.28    8.85 
  -2  -9  -2  163.23   24.42 
   2   9   2  135.03   19.95 
   2   9   2  121.75   23.42 
  -2  -9  -2  142.05   80.69 
  -2  -9  -2  167.66   75.32 
   2   9   2  213.40   69.35 
  -3  -9  -2   54.57   19.12 
  -3  -9  -2   65.94    6.41 
  -3  -9  -2   74.71    4.31 
  -3  -9  -2   31.24   22.05 
  -3  -9  -2   75.93    4.46 
   3   9   2   49.26   18.38 
   3   9   2   62.82   19.11 
  -3  -9  -2  174.51   71.28 
  -3  -9  -2  -33.87   50.93 
   3   9   2  113.87   63.94 
  -4  -9  -2   35.15   21.06 
  -4  -9  -2   22.27    3.13 
  -4  -9  -2   12.55   12.89 
  -4  -9  -2   36.21    3.55 
   4   9   2   60.83   18.92 
   4   9   2   31.78   12.99 
  -4  -9  -2   35.08   43.20 
   4   9   2   31.99   58.77 
  -5  -9  -2  150.77    8.40 
  -5  -9  -2  143.64   22.21 
  -5  -9  -2  131.64   25.42 
   5   9   2  106.64   21.13 
   5   9   2  171.12   26.21 
  -5  -9  -2  224.32   66.55 
  -6  -9  -2  361.64   31.87 
  -6  -9  -2  338.98   38.88 
  -6  -9  -2  419.88   20.10 
   6   9   2  366.20   22.49 
   6   9   2  409.64   33.81 
   6   9   2  355.09   34.23 
  -6  -9  -2  301.74   72.56 
  -7  -9  -2   12.44    3.89 
  -7  -9  -2    1.18   18.43 
  -7  -9  -2  -36.79   18.32 
   7   9   2   11.36   19.40 
   7   9   2   11.59    4.02 
   7   9   2   23.54   17.74 
  -7  -9  -2   44.77   59.76 
  -7  -9  -2   -6.74   57.71 
  -8  -9  -2  143.58   24.95 
  -8  -9  -2  127.90   23.64 
  -8  -9  -2  176.80   10.08 
   8   9   2  158.81   11.16 
   8   9   2  159.54   25.16 
   8   9   2  151.63   22.89 
  -8  -9  -2  177.65   67.11 
  -8  -9  -2  208.86   79.22 
  -9  -9  -2   15.33   19.65 
  -9  -9  -2   15.01   13.75 
  -9  -9  -2   27.20    5.01 
   9   9   2   40.74   17.31 
   9   9   2   38.67   13.84 
  -9  -9  -2   82.00   61.26 
  -9  -9  -2    0.00   41.81 
 -10  -9  -2  102.53   23.80 
 -10  -9  -2  119.10    8.30 
  10   9   2  123.43   22.04 
 -10  -9  -2   97.73   57.15 
 -11  -9  -2   12.52    4.09 
  11   9   2   15.03   17.22 
 -11  -9  -2   46.67   81.56 
 -12  -9  -2    1.26    5.83 
  12   9   2   24.83   18.14 
   7 -10  -2  146.29   33.89 
   7 -10  -2  142.99   22.01 
  -7  10   2  130.57   12.69 
  -7  10   2  165.11   34.99 
   6 -10  -2   32.07   11.62 
   6 -10  -2   44.91   26.26 
   6 -10  -2   42.02   34.42 
  -6  10   2   31.18    8.31 
  -6  10   2   25.52   25.14 
  -6  10   2   25.29   99.82 
   5 -10  -2  408.98   38.59 
   5 -10  -2  417.96   44.83 
   5 -10  -2  309.28   48.30 
  -5  10   2  510.86   46.59 
  -5  10   2  420.15   28.22 
   5 -10  -2  173.97  166.52 
  -5  10   2  357.27  107.86 
   4 -10  -2   79.28    6.25 
   4 -10  -2   87.72   23.86 
   4 -10  -2  109.47   13.66 
   4 -10  -2   88.31    5.56 
   4 -10  -2   96.07   25.97 
  -4  10   2   73.56   23.74 
  -4  10   2   98.64    8.66 
   4 -10  -2  -10.42   98.69 
  -4  10   2  295.28   91.09 
   3 -10  -2  249.76   37.26 
   3 -10  -2  320.01   43.94 
   3 -10  -2  333.99   25.51 
   3 -10  -2  300.24   19.90 
  -3  10   2  305.76   20.54 
  -3  10   2  338.32   43.33 
  -3  10   2  218.92   35.69 
   3 -10  -2  145.12  134.93 
  -3  10   2  319.58  111.71 
   2 -10  -2  146.04   27.58 
   2 -10  -2  161.68    9.80 
   2 -10  -2  149.72   24.90 
  -2  10   2  187.34   24.73 
  -2  10   2  179.34   26.93 
  -2  10   2  180.74   10.25 
   2 -10  -2  144.53   77.90 
  -2  10   2   50.16   67.81 
   1 -10  -2   18.05   15.91 
   1 -10  -2   40.77   19.83 
   1 -10  -2   22.95    2.40 
  -1  10   2   28.14   15.98 
  -1  10   2   42.69   24.40 
  -1  10   2   26.44    3.27 
   1 -10  -2   95.14   72.87 
  -1  10   2  -73.72   84.56 
   0 -10  -2  274.39   34.17 
   0 -10  -2  303.39   21.31 
   0 -10  -2  341.48   35.12 
   0 -10  -2  312.10   18.34 
   0  10   2  368.43   33.83 
   0  10   2  367.93   34.68 
   0 -10  -2  329.17  100.43 
   0  10   2  102.69   63.00 
  -1 -10  -2 1407.79   93.82 
  -1 -10  -2 1327.46   90.12 
  -1 -10  -2 1351.34   72.66 
  -1 -10  -2 1396.71   99.22 
   1  10   2 1333.68   94.99 
   1  10   2 1292.59  104.56 
  -1 -10  -2 1268.95  178.71 
   1  10   2 1331.11  161.90 
  -2 -10  -2  567.58   31.60 
  -2 -10  -2  541.22   47.08 
  -2 -10  -2  613.67   36.70 
  -2 -10  -2  611.49   48.28 
   2  10   2  664.75   47.68 
   2  10   2  583.60   45.04 
  -2 -10  -2  559.01   98.30 
  -2 -10  -2  485.90  110.01 
   2  10   2  705.83   96.76 
  -3 -10  -2   47.06    3.58 
  -3 -10  -2   55.34    5.45 
  -3 -10  -2   78.68   20.01 
  -3 -10  -2   39.99   15.92 
  -3 -10  -2   54.73    4.10 
   3  10   2   49.25   15.76 
   3  10   2   30.20   15.14 
  -3 -10  -2   94.95   58.61 
  -3 -10  -2  -55.73   84.51 
   3  10   2   15.37   49.10 
  -4 -10  -2  453.49   37.64 
  -4 -10  -2  408.15   40.29 
  -4 -10  -2  381.03   32.90 
  -4 -10  -2  390.91   20.20 
   4  10   2  407.03   37.45 
   4  10   2  359.72   47.47 
  -4 -10  -2  282.85   87.13 
  -4 -10  -2  314.78   91.28 
   4  10   2  316.69   84.21 
  -5 -10  -2   39.04   23.00 
  -5 -10  -2   55.24   15.70 
  -5 -10  -2   36.21    3.42 
   5  10   2   -0.22   18.40 
   5  10   2   22.33   12.97 
  -5 -10  -2  104.19   54.91 
   5  10   2  114.99   53.37 
  -6 -10  -2   12.55   19.43 
  -6 -10  -2    0.54    3.49 
  -6 -10  -2  -17.96   21.01 
   6  10   2  -11.93   16.32 
   6  10   2    0.50    2.71 
   6  10   2   -9.22   18.44 
  -6 -10  -2  -40.95   61.80 
  -7 -10  -2  220.63   13.14 
  -7 -10  -2  177.64   27.40 
  -7 -10  -2  272.29   31.23 
   7  10   2  294.06   29.18 
   7  10   2  193.32   15.18 
   7  10   2  195.07   26.56 
  -7 -10  -2  190.02   72.96 
  -7 -10  -2  213.30   72.91 
  -8 -10  -2   20.56   15.14 
  -8 -10  -2   15.89   20.38 
  -8 -10  -2    9.34    4.50 
   8  10   2    4.36   18.68 
   8  10   2   23.23   18.11 
   8  10   2    8.63    3.48 
  -8 -10  -2  -11.97   67.61 
  -8 -10  -2   30.78   75.46 
  -9 -10  -2   92.19    6.15 
  -9 -10  -2  112.66   23.84 
  -9 -10  -2   63.87   23.29 
   9  10   2   60.84    7.04 
   9  10   2   46.51   21.54 
   9  10   2  108.74   22.97 
  -9 -10  -2    9.44   47.31 
  -9 -10  -2   30.69   83.54 
 -10 -10  -2   81.47   25.90 
 -10 -10  -2  138.59   10.01 
  10  10   2  119.33   23.53 
 -10 -10  -2  185.78   90.65 
 -11 -10  -2  200.40   14.22 
  11  10   2  183.73   25.83 
 -11 -10  -2  125.92   88.84 
   6 -11  -2  279.74   26.57 
   6 -11  -2  211.03   38.66 
  -6  11   2  317.71   42.59 
  -6  11   2  230.38   18.36 
   5 -11  -2   58.19   11.60 
   5 -11  -2   49.76   27.41 
  -5  11   2   44.61    6.22 
  -5  11   2   37.27   25.59 
   5 -11  -2   84.66  119.97 
  -5  11   2  249.63  117.50 
   4 -11  -2   17.08   31.74 
   4 -11  -2    4.32    0.70 
   4 -11  -2   -1.48   22.37 
   4 -11  -2    5.00    0.75 
   4 -11  -2    6.04   10.84 
  -4  11   2   -5.74   21.67 
  -4  11   2   18.59    5.85 
   4 -11  -2 -132.42  155.60 
  -4  11   2 -108.74   86.09 
   3 -11  -2   42.72   21.06 
   3 -11  -2   46.78    3.72 
   3 -11  -2   60.61   10.95 
   3 -11  -2   56.76   25.25 
  -3  11   2   -2.83   29.07 
  -3  11   2   50.62    5.96 
   3 -11  -2  173.07  104.28 
  -3  11   2  -22.21   80.65 
   2 -11  -2  173.30   26.40 
   2 -11  -2  107.42    7.34 
   2 -11  -2  122.53   30.18 
   2 -11  -2  122.25   12.07 
  -2  11   2   83.02   23.91 
  -2  11   2   99.14   21.25 
  -2  11   2  117.22   19.00 
   2 -11  -2  -11.00   81.42 
  -2  11   2   78.16   76.39 
   1 -11  -2  197.08   12.93 
   1 -11  -2  245.38   29.58 
   1 -11  -2  274.58  110.94 
  -1  11   2  193.14   28.50 
  -1  11   2  215.80   27.65 
   1 -11  -2   51.01   78.13 
  -1  11   2  184.92   79.44 
   0 -11  -2   10.57   26.57 
   0 -11  -2   11.34    2.21 
   0 -11  -2    6.58   16.63 
   0  11   2   19.33   15.80 
   0  11   2   37.36   25.40 
   0 -11  -2   62.61   75.49 
   0  11   2  123.09   90.57 
  -1 -11  -2   87.76   20.25 
  -1 -11  -2   58.97    4.23 
  -1 -11  -2   63.38    5.80 
  -1 -11  -2   92.43   23.29 
   1  11   2   74.67   19.56 
   1  11   2   31.02   17.56 
  -1 -11  -2  -18.66   71.05 
   1  11   2   92.80   64.26 
  -2 -11  -2   -6.34   17.17 
  -2 -11  -2  -10.87   14.19 
   2  11   2   -3.34   15.06 
   2  11   2    9.08   14.79 
  -2 -11  -2  105.35   69.65 
   2  11   2  -41.61   59.64 
  -3 -11  -2   17.55   18.93 
  -3 -11  -2   28.53   15.87 
  -3 -11  -2    5.47    3.50 
  -3 -11  -2   10.41    2.91 
  -3 -11  -2   12.63    2.37 
   3  11   2   27.10   14.48 
   3  11   2   18.51   15.08 
  -3 -11  -2  -46.09   63.32 
  -3 -11  -2 -104.82   90.15 
   3  11   2  -41.10   57.17 
  -4 -11  -2  283.46   21.81 
  -4 -11  -2  320.06   34.13 
  -4 -11  -2  344.02   17.12 
  -4 -11  -2  316.30   35.09 
  -4 -11  -2  277.65   26.77 
   4  11   2  369.71   32.44 
   4  11   2  261.85   34.38 
  -4 -11  -2  309.38  130.31 
  -4 -11  -2  331.15  102.14 
   4  11   2  428.26   83.50 
  -5 -11  -2   94.21   19.16 
  -5 -11  -2  111.91    7.04 
  -5 -11  -2  141.08   28.60 
   5  11   2  142.55   25.46 
   5  11   2  118.41   19.65 
  -5 -11  -2   28.86  124.53 
  -5 -11  -2  117.10   62.57 
   5  11   2  141.69   84.66 
  -6 -11  -2    3.05    3.72 
  -6 -11  -2   18.99   18.32 
  -6 -11  -2    6.23   14.03 
   6  11   2    7.51   14.62 
   6  11   2   -5.64   17.96 
   6  11   2   -8.39    4.11 
  -6 -11  -2  -22.52  102.20 
  -6 -11  -2  102.86   82.16 
  -7 -11  -2  165.88   10.30 
  -7 -11  -2  140.77   22.19 
  -7 -11  -2  104.91   28.28 
   7  11   2  146.06   12.27 
   7  11   2  192.04   27.29 
   7  11   2  158.44   27.34 
  -7 -11  -2  -14.44   76.18 
  -8 -11  -2   12.89   17.04 
  -8 -11  -2   23.50    3.83 
  -8 -11  -2   52.31   18.86 
   8  11   2   21.04   14.88 
   8  11   2   17.08   14.88 
   8  11   2   11.75    4.09 
  -8 -11  -2  -66.33   49.31 
  -8 -11  -2   75.61   84.76 
  -9 -11  -2    9.88   16.94 
  -9 -11  -2   20.09   17.98 
  -9 -11  -2   28.32    5.66 
   9  11   2   57.20   16.22 
  -9 -11  -2  117.04   81.97 
 -10 -11  -2   80.64    7.86 
  10  11   2   70.33   22.78 
 -11 -11  -2   94.07    8.91 
  11  11   2   77.22   22.26 
   6 -12  -2   35.33   31.78 
   6 -12  -2   33.62   17.40 
  -6  12   2   14.04    8.00 
  -6  12   2   12.19   30.34 
   5 -12  -2   64.36   40.11 
   5 -12  -2   30.02   14.74 
  -5  12   2   31.97    7.38 
  -5  12   2   73.64   30.90 
   4 -12  -2    8.62   11.42 
   4 -12  -2   -7.87   23.71 
  -4  12   2   23.35   25.13 
  -4  12   2   -0.49    3.76 
   4 -12  -2  142.72  124.34 
   3 -12  -2  142.65   31.17 
   3 -12  -2  139.75   13.94 
   3 -12  -2  132.23    9.88 
  -3  12   2  168.61   31.62 
  -3  12   2  151.03   11.36 
   3 -12  -2  195.83  123.36 
  -3  12   2  265.14  109.20 
   2 -12  -2  222.75   24.35 
   2 -12  -2  186.49   13.46 
   2 -12  -2  239.35   34.84 
   2 -12  -2  292.23   36.89 
  -2  12   2  217.55   32.52 
  -2  12   2  213.03   15.18 
   2 -12  -2  -77.34   91.26 
  -2  12   2  256.30   96.84 
   1 -12  -2  121.21    9.31 
   1 -12  -2  112.33   35.91 
   1 -12  -2  121.51   26.02 
  -1  12   2   84.28   23.04 
  -1  12   2  156.50   27.84 
   1 -12  -2  134.81   91.17 
  -1  12   2   94.19  111.16 
   0 -12  -2    7.74   18.52 
   0 -12  -2    6.11   20.75 
   0 -12  -2    5.76    2.32 
   0  12   2   16.50   18.02 
   0  12   2  -10.24   17.51 
   0 -12  -2  -17.43   87.56 
   0  12   2   -4.34   68.57 
  -1 -12  -2  476.08   31.44 
  -1 -12  -2  481.38   44.67 
  -1 -12  -2  528.42   35.07 
  -1 -12  -2  597.69   69.73 
   1  12   2  471.22   48.68 
   1  12   2  538.94   45.20 
  -1 -12  -2  327.03  108.18 
   1  12   2  681.41  131.88 
  -2 -12  -2 1352.64   96.18 
  -2 -12  -2 1380.20  111.50 
  -2 -12  -2 1325.02  112.97 
  -2 -12  -2 1275.64   82.68 
   2  12   2 1467.63  112.38 
   2  12   2 1308.88   93.13 
  -2 -12  -2  925.11  211.60 
   2  12   2 1208.50  184.64 
  -3 -12  -2   90.94    9.92 
  -3 -12  -2  105.07    7.57 
  -3 -12  -2  106.94    7.09 
  -3 -12  -2  173.94   28.18 
  -3 -12  -2   94.93   26.34 
   3  12   2   54.56   23.97 
   3  12   2  172.08   24.06 
  -3 -12  -2  122.28  109.92 
  -3 -12  -2  161.83  107.84 
   3  12   2   94.04   70.73 
  -4 -12  -2  123.76    8.32 
  -4 -12  -2  126.46   32.56 
  -4 -12  -2  146.36   23.72 
  -4 -12  -2  116.99   11.27 
  -4 -12  -2  141.44    7.94 
   4  12   2  112.37   20.61 
   4  12   2  141.35   27.82 
  -4 -12  -2  130.98   75.19 
  -4 -12  -2   92.02  123.34 
   4  12   2  205.70   98.88 
  -5 -12  -2  480.25   46.74 
  -5 -12  -2  394.20   24.38 
  -5 -12  -2  420.13   39.22 
   5  12   2  391.92   41.94 
   5  12   2  511.92   44.42 
  -5 -12  -2  609.40  171.75 
  -5 -12  -2  322.20   91.61 
   5  12   2  559.66  112.95 
  -6 -12  -2  418.20   25.92 
  -6 -12  -2  407.21   55.75 
  -6 -12  -2  379.42   37.69 
   6  12   2  456.88   38.39 
   6  12   2  472.80   54.12 
   6  12   2  388.93   35.92 
  -6 -12  -2  132.99   79.13 
  -6 -12  -2  417.20  175.76 
  -7 -12  -2   70.60    6.06 
  -7 -12  -2   66.11   21.98 
  -7 -12  -2   44.06   18.03 
   7  12   2   15.10   17.39 
   7  12   2   57.91   17.45 
  -7 -12  -2   68.42   64.18 
  -7 -12  -2   -2.11  176.64 
  -8 -12  -2    3.04    3.47 
  -8 -12  -2  -12.69   25.42 
   8  12   2    0.89   20.40 
   8  12   2   10.79   21.98 
  -8 -12  -2   66.58   88.43 
  -8 -12  -2   36.04   87.00 
  -9 -12  -2    5.79    5.42 
   9  12   2   15.37   21.98 
 -10 -12  -2    1.75    4.15 
  10  12   2   -4.63   22.34 
  11  12   2  -24.85   18.75 
   5 -13  -2   19.31   15.40 
   5 -13  -2  -19.86   44.19 
  -5  13   2   15.09   43.60 
  -5  13   2   25.99    7.05 
   4 -13  -2   64.37   12.05 
   4 -13  -2   71.27   31.72 
  -4  13   2   48.19   28.34 
  -4  13   2   70.56    6.93 
   3 -13  -2  -10.56   10.25 
   3 -13  -2   11.36   25.23 
  -3  13   2    3.08   22.33 
  -3  13   2    5.75    3.71 
   2 -13  -2   25.88   36.72 
   2 -13  -2    8.24    8.73 
  -2  13   2   -0.47   31.36 
  -2  13   2    5.98    3.06 
  -2  13   2  -33.79  132.38 
   1 -13  -2  257.21   22.87 
   1 -13  -2  195.22   14.29 
   1 -13  -2  186.20   43.26 
  -1  13   2  170.37   37.54 
   1 -13  -2  124.97  105.70 
  -1  13   2   58.81  121.10 
   0 -13  -2   18.82    2.82 
   0 -13  -2    2.06   32.15 
   0  13   2   53.50   21.94 
   0  13   2   -2.85   29.64 
   0 -13  -2   42.26   92.66 
   0  13   2  -37.74  112.40 
  -1 -13  -2    4.64   23.11 
  -1 -13  -2   13.05    2.86 
   1  13   2    4.57   16.91 
   1  13   2    2.69   19.33 
  -1 -13  -2  -28.96   87.46 
   1  13   2 -115.79   82.01 
  -2 -13  -2    0.52   22.24 
  -2 -13  -2    7.48    3.11 
  -2 -13  -2    4.26    4.19 
   2  13   2   19.28   24.17 
   2  13   2   48.57   25.98 
  -2 -13  -2    6.45  130.96 
   2  13   2  -40.90   73.02 
  -3 -13  -2   19.64   36.02 
  -3 -13  -2   19.40    3.76 
  -3 -13  -2   14.63    4.44 
  -3 -13  -2   15.19    3.48 
   3  13   2   37.11   18.96 
   3  13   2   15.40   17.22 
  -3 -13  -2  -24.54   83.21 
   3  13   2  -19.31   71.65 
  -4 -13  -2  129.25   11.03 
  -4 -13  -2  111.83   35.71 
  -4 -13  -2  141.69   10.04 
  -4 -13  -2  131.05    9.19 
   4  13   2  146.68   23.99 
   4  13   2  162.11   35.56 
  -4 -13  -2   74.19   84.98 
  -4 -13  -2  -10.28  155.02 
   4  13   2  200.37  111.67 
  -5 -13  -2   -0.81   20.27 
  -5 -13  -2    7.19    3.06 
  -5 -13  -2   12.67    3.15 
   5  13   2  -13.95   17.03 
   5  13   2   40.42   29.29 
  -5 -13  -2  -79.30  119.81 
  -5 -13  -2   55.20  107.61 
   5  13   2   85.85  101.06 
  -6 -13  -2    5.67    4.29 
  -6 -13  -2   16.49   31.62 
   6  13   2   -1.36   24.37 
   6  13   2   -0.42   20.53 
  -6 -13  -2  257.00  182.44 
  -6 -13  -2 -182.11  102.22 
  -7 -13  -2    4.61    4.57 
  -7 -13  -2  -16.68   20.41 
   7  13   2    0.46   16.97 
   7  13   2    0.85   16.40 
  -7 -13  -2   49.80   71.14 
  -8 -13  -2   16.77   28.57 
  -8 -13  -2   -1.58    3.52 
   8  13   2    7.49   17.19 
   9  13   2   51.89   26.07 
 -10 -13  -2   15.92    6.40 
  10  13   2   -6.58   22.78 
   4 -14  -2    4.53   46.75 
   4 -14  -2   22.93   26.38 
  -4  14   2    7.00    4.49 
  -4  14   2   19.58   32.19 
   3 -14  -2   14.36   11.89 
   3 -14  -2   10.61   32.18 
  -3  14   2   52.13   31.54 
  -3  14   2    6.88    3.87 
   2 -14  -2   38.67   43.62 
   2 -14  -2   67.43   11.97 
  -2  14   2   60.51   37.37 
   1 -14  -2    2.82    2.58 
   1 -14  -2    3.08   26.52 
   1 -14  -2   -0.43    7.52 
  -1  14   2  -10.21   22.93 
  -1  14   2   33.28   97.33 
   0 -14  -2   35.16    3.38 
   0 -14  -2   51.80   28.91 
   0 -14  -2   36.37    7.21 
   0  14   2   22.51   22.60 
  -1 -14  -2   59.53    6.21 
  -1 -14  -2   53.03   37.53 
   1  14   2   61.86   32.78 
  -2 -14  -2  297.09   42.26 
  -2 -14  -2  311.26   18.30 
  -2 -14  -2  271.47   25.63 
   2  14   2  274.66   34.45 
   2  14   2  413.83   39.89 
  -2 -14  -2   29.47   89.07 
   2  14   2   31.63   78.00 
  -3 -14  -2  127.06    9.68 
  -3 -14  -2  119.10   11.38 
  -3 -14  -2  166.54   33.53 
  -3 -14  -2   97.51   11.52 
   3  14   2  142.41   26.60 
   3  14   2  137.10   31.68 
  -3 -14  -2  257.72  146.12 
   3  14   2  185.26   96.20 
  -4 -14  -2  148.83   40.82 
  -4 -14  -2  158.51   10.95 
  -4 -14  -2  131.48   14.74 
   4  14   2  216.67   35.36 
   4  14   2  129.04   32.00 
  -4 -14  -2   54.61  131.47 
  -5 -14  -2  167.66   15.39 
  -5 -14  -2  240.73   35.51 
  -5 -14  -2  178.01   12.36 
   5  14   2  167.01   32.46 
   5  14   2  183.04   28.38 
  -5 -14  -2  117.70  204.23 
  -5 -14  -2   76.13  123.86 
  -6 -14  -2  154.94   14.06 
  -6 -14  -2  169.96   12.31 
  -6 -14  -2  148.35   34.41 
   6  14   2  185.91   28.28 
   6  14   2  100.23   32.33 
  -6 -14  -2   79.94  119.24 
  -7 -14  -2   58.83   35.08 
  -7 -14  -2   67.92    6.77 
   7  14   2   90.05   29.84 
  -8 -14  -2   58.12    5.69 
   8  14   2   54.21   21.97 
  -9 -14  -2   18.14    4.82 
   9  14   2   29.80   27.41 
   2 -15  -2   -6.15   46.20 
  -2  15   2   16.46   39.91 
   1 -15  -2   25.59   32.64 
  -1  15   2    2.24   25.27 
   0 -15  -2   39.14    3.81 
   0 -15  -2   31.20   31.70 
   0  15   2   20.24   26.20 
  -1 -15  -2  143.91   12.08 
  -1 -15  -2  179.31   38.85 
   1  15   2  155.41   56.53 
  -2 -15  -2   13.90    3.88 
  -2 -15  -2  -29.16   41.54 
   2  15   2   -0.65   31.32 
  -3 -15  -2    1.17    3.94 
  -3 -15  -2    1.11   40.50 
   3  15   2   -3.71   29.43 
   3  15   2   23.67   21.51 
  -4 -15  -2   47.47   41.23 
  -4 -15  -2   14.03    4.49 
   4  15   2   -8.90   30.92 
   4  15   2   12.71   19.16 
  -5 -15  -2   63.94   29.44 
  -5 -15  -2   17.65    4.86 
   5  15   2   27.66   22.55 
   5  15   2   -2.06   20.14 
  -6 -15  -2   24.33   30.32 
   6  15   2   40.63   30.66 
   7  15   2   24.44   22.28 
  -8 -15  -2    1.31    4.11 
   8  15   2  -25.97   29.71 
   1 -16  -2   23.59   36.02 
  -1  16   2   17.91   31.91 
   0 -16  -2   23.61   34.59 
   0  16   2   34.59   29.62 
  -1 -16  -2   48.29    4.86 
  -1 -16  -2   87.68   37.85 
   1  16   2   64.06   29.29 
  -2 -16  -2  122.89   39.75 
  -2 -16  -2  123.27   10.72 
   2  16   2  137.26   31.57 
  -3 -16  -2  148.70   40.30 
  -3 -16  -2   87.01    7.70 
   3  16   2  125.84   29.67 
  -4 -16  -2   -9.85   30.05 
  -4 -16  -2   15.15    4.80 
   4  16   2  -23.14   24.51 
  -5 -16  -2   26.10    5.31 
  -5 -16  -2   -4.57   29.21 
   5  16   2   53.71   25.84 
  -6 -16  -2    0.59   43.90 
  -6 -16  -2   -2.69    5.28 
   6  16   2  -23.04   33.14 
  -7 -16  -2   13.13    9.92 
   7  16   2   37.24   35.72 
  -2 -17  -2   50.85   38.26 
  -2 -17  -2   -1.26    5.91 
   2  17   2    6.20   27.19 
  -3 -17  -2  -24.00   48.27 
  -3 -17  -2   18.73    6.47 
   3  17   2   24.31   36.78 
  -4 -17  -2  105.20   40.64 
  -4 -17  -2   83.09    7.59 
   4  17   2   70.86   30.09 
  -5 -17  -2  -22.23   44.76 
  -5 -17  -2   -2.38    3.47 
   5  17   2   -4.54   35.72 
   5  16  -3   17.03   21.97 
  -5 -16   3   25.50    7.75 
   4  16  -3    4.31   21.10 
  -4 -16   3   15.74    5.21 
   3  16  -3   23.80   32.90 
  -3 -16   3  -10.88   46.53 
  -3 -16   3    2.56    6.30 
   2  16  -3   -4.46   22.80 
  -2 -16   3   15.22    6.13 
  -2 -16   3  -15.50   31.89 
   1  16  -3   23.08   26.76 
  -1 -16   3   14.12    5.83 
  -1 -16   3   32.41   35.58 
   0  16  -3  122.23   32.30 
   0 -16   3   90.31    8.88 
   0 -16   3   79.24   38.06 
   7  15  -3  322.09   49.91 
  -7 -15   3  269.63   23.43 
   6  15  -3  127.26   25.81 
  -6 -15   3  140.02   11.93 
   5  15  -3   15.04   27.27 
  -5 -15   3   28.58    7.12 
   4  15  -3   50.03   29.40 
  -4 -15   3   -0.31   40.27 
  -4 -15   3   60.07    7.63 
   3  15  -3   21.47   50.04 
   3  15  -3   11.99   21.47 
  -3 -15   3   19.72   29.08 
  -3 -15   3   20.38    6.11 
   2  15  -3   -3.64   18.80 
   2  15  -3  -14.38   20.07 
  -2 -15   3    1.45   29.32 
  -2 -15   3    6.57    5.44 
   1  15  -3   -6.16   21.21 
  -1 -15   3   -0.79    3.49 
  -1 -15   3   11.41   29.07 
   0  15  -3  -10.97   22.56 
   0 -15   3    5.63    5.14 
   0 -15   3   -4.61   29.26 
  -1  15  -3  245.75   39.52 
   1 -15   3  271.79   46.22 
  -2  15  -3  264.39   40.88 
   2 -15   3  222.62   46.58 
   8  14  -3    6.31   20.51 
  -8 -14   3   13.06    7.54 
   7  14  -3   15.37   22.27 
  -7 -14   3   12.34    6.90 
   6  14  -3  148.30   29.27 
  -6 -14   3  136.12   11.41 
   5  14  -3   77.32   26.02 
  -5 -14   3   61.46   35.60 
  -5 -14   3   89.47    8.73 
   4  14  -3    4.86   15.03 
   4  14  -3    7.77   18.10 
  -4 -14   3  -14.85   24.21 
  -4 -14   3   -1.77    5.35 
  -4 -14   3    0.88    9.42 
   4  14  -3   45.14   72.15 
  -4 -14   3   -3.77   84.30 
   3  14  -3   93.48   26.11 
   3  14  -3  132.32   25.40 
  -3 -14   3  111.53   11.92 
  -3 -14   3  115.39   30.60 
   3  14  -3  351.32  129.33 
  -3 -14   3  -58.38  126.92 
   2  14  -3  217.60   31.58 
   2  14  -3  209.11   28.39 
  -2 -14   3  177.21   36.15 
  -2 -14   3  205.45   18.31 
   2  14  -3  328.43  101.01 
  -2 -14   3  204.77  142.85 
   1  14  -3   39.33   18.95 
   1  14  -3    7.31   19.95 
  -1 -14   3  -17.62   24.03 
   1  14  -3  104.52   89.20 
  -1 -14   3   -1.92  104.47 
   0  14  -3   48.21   31.52 
   0 -14   3   34.03   39.41 
   0  14  -3   70.39  124.81 
  -1  14  -3  218.30   42.72 
   1 -14   3  358.29   53.48 
  -2  14  -3   -3.63   24.45 
   2 -14   3   25.91   29.45 
  -3  14  -3   98.10   31.01 
   3 -14   3   45.94   32.87 
  -4  14  -3   45.03   32.63 
   4 -14   3   19.38   33.97 
   9  13  -3   13.51   19.08 
  -9 -13   3    5.75    5.16 
   8  13  -3    6.63   16.93 
  -8 -13   3    2.35    4.71 
   7  13  -3   26.65   19.41 
  -7 -13   3   19.46    6.51 
  -7 -13   3    0.00  106.96 
   6  13  -3   33.98   20.45 
  -6 -13   3    2.96    6.01 
  -6 -13   3    9.28   12.42 
  -6 -13   3    2.32   23.97 
   6  13  -3  115.45   88.20 
  -6 -13   3   52.24  112.73 
   5  13  -3   52.73   16.94 
   5  13  -3   51.49   14.90 
  -5 -13   3   45.80    6.59 
  -5 -13   3   21.96   20.00 
  -5 -13   3   47.51   10.49 
   5  13  -3   98.68   99.75 
  -5 -13   3   40.53   76.19 
   4  13  -3   25.49   22.38 
   4  13  -3   32.99   18.69 
  -4 -13   3   15.86    5.45 
  -4 -13   3   -6.12    8.33 
  -4 -13   3   42.96   30.19 
   4  13  -3  -50.34   97.62 
  -4 -13   3   42.00  116.91 
   3  13  -3   98.30   18.69 
   3  13  -3  164.49   29.20 
  -3 -13   3  147.36   37.19 
  -3 -13   3   87.59    8.78 
   3  13  -3  121.05  104.34 
  -3 -13   3  132.65   99.60 
   2  13  -3  211.86   34.23 
   2  13  -3  374.51   37.84 
  -2 -13   3  294.82   37.64 
  -2 -13   3  250.38   19.71 
   2  13  -3  206.02   85.56 
  -2 -13   3  273.53  134.18 
   1  13  -3  151.66   33.53 
   1  13  -3  274.74   32.39 
  -1 -13   3  216.71   34.86 
   1  13  -3  196.22   88.25 
  -1 -13   3   94.19  139.68 
   0  13  -3    8.82   27.93 
   0 -13   3   -8.54   33.39 
   0  13  -3   84.16  116.72 
   0 -13   3  192.65  155.91 
  -1  13  -3   43.29   31.14 
  -1  13  -3   15.31   23.00 
   1 -13   3   69.84   36.19 
   1 -13   3   69.26  108.56 
  -2  13  -3   82.00   34.95 
   2 -13   3  114.49   39.56 
  -3  13  -3   27.94   25.42 
   3 -13   3   14.52   26.14 
  -4  13  -3   18.78    4.49 
  -4  13  -3   20.39   36.93 
   4 -13   3   46.22   40.47 
  -5  13  -3   81.25   43.76 
  -5  13  -3   86.00    7.69 
   5 -13   3   63.53   46.62 
   9  12  -3   24.81   15.90 
  -9 -12   3   41.63    5.88 
   8  12  -3   -6.31   16.55 
  -8 -12   3   -4.14   12.29 
  -8 -12   3    0.26   16.38 
  -8 -12   3   -4.49    4.16 
  -8 -12   3   30.25   78.68 
   7  12  -3   17.50   17.30 
  -7 -12   3   17.23   12.85 
  -7 -12   3   12.98   11.74 
  -7 -12   3   17.64    4.50 
  -7 -12   3  -40.54   83.43 
   6  12  -3    1.56   14.30 
   6  12  -3   15.17   12.16 
  -6 -12   3   20.50   21.98 
  -6 -12   3   15.32    4.26 
  -6 -12   3   14.30   11.76 
  -6 -12   3   18.39   19.13 
   6  12  -3 -134.11   71.59 
  -6 -12   3  -16.03   84.04 
   5  12  -3  130.42   23.15 
   5  12  -3  134.44   20.93 
  -5 -12   3  120.40    7.61 
  -5 -12   3  108.18   24.72 
  -5 -12   3  101.96   13.31 
  -5 -12   3  142.28   10.07 
  -5 -12   3  144.49   29.47 
   5  12  -3  143.58   89.25 
  -5 -12   3  147.25  100.11 
   4  12  -3  203.86   19.10 
   4  12  -3  205.30   24.93 
   4  12  -3  174.94   30.13 
  -4 -12   3  226.54   29.75 
  -4 -12   3  195.98   15.88 
  -4 -12   3  198.68   29.55 
   4  12  -3  335.00   97.14 
  -4 -12   3  138.37  103.91 
   3  12  -3  163.45   22.79 
   3  12  -3  130.97   12.34 
   3  12  -3  196.55   21.38 
  -3 -12   3  102.87   25.23 
  -3 -12   3  146.01   23.44 
  -3 -12   3  119.91    9.41 
   3  12  -3  134.32   70.58 
  -3 -12   3   51.19   81.09 
   2  12  -3  156.56   23.80 
   2  12  -3   84.35   17.91 
  -2 -12   3  118.89   23.49 
  -2 -12   3  181.60   28.16 
   2  12  -3  124.31   69.33 
  -2 -12   3   89.87   85.70 
   1  12  -3   50.99   16.50 
   1  12  -3   52.86   19.39 
  -1 -12   3   31.64   22.07 
  -1 -12   3   43.71   21.00 
   1  12  -3   56.21   66.83 
  -1 -12   3   72.97   90.74 
   0  12  -3   33.42   26.80 
   0  12  -3   14.64   15.16 
   0 -12   3   18.71   31.26 
   0 -12   3   24.08   21.37 
   0  12  -3   69.48   98.17 
   0 -12   3  -14.52   93.92 
  -1  12  -3  302.11   35.69 
   1 -12   3  256.23   36.36 
  -1  12  -3  161.34   87.43 
   1 -12   3   93.24  152.87 
  -2  12  -3  605.86   54.78 
  -2  12  -3  556.41   73.40 
  -2  12  -3  655.04   47.08 
   2 -12   3  694.01   58.26 
  -2  12  -3  252.14  100.22 
   2 -12   3  419.64  175.58 
  -3  12  -3  164.63   37.35 
  -3  12  -3  182.20   14.51 
   3 -12   3  216.65   43.59 
   3 -12   3  145.02  116.79 
  -4  12  -3    2.39    4.09 
  -4  12  -3  -14.36   21.88 
   4 -12   3   -4.45   26.08 
   4 -12   3  132.90  177.81 
  -5  12  -3   20.90   25.04 
  -5  12  -3    7.85    5.25 
   5 -12   3   17.16   28.98 
  -6  12  -3  139.63   44.12 
  -6  12  -3  100.75   10.08 
   6 -12   3   69.38   34.28 
 -10 -11   3   -4.50    4.47 
   9  11  -3   12.81    8.61 
  -9 -11   3   17.90    4.64 
   8  11  -3   51.36   15.74 
  -8 -11   3   27.96    4.86 
  -8 -11   3   18.65   12.25 
  -8 -11   3   19.67   13.38 
  -8 -11   3  -11.07   72.00 
   7  11  -3  122.13   20.36 
   7  11  -3  177.82   20.65 
  -7 -11   3  133.10   22.04 
  -7 -11   3  111.21   19.48 
  -7 -11   3  143.01   10.18 
  -7 -11   3  105.10   16.53 
  -7 -11   3   75.87   66.08 
   6  11  -3   37.84   13.05 
   6  11  -3   68.38   17.45 
  -6 -11   3   41.84   12.28 
  -6 -11   3   34.29    4.81 
  -6 -11   3   26.75   17.01 
  -6 -11   3   47.90   20.56 
   6  11  -3   69.29   46.59 
  -6 -11   3   30.69   72.26 
   5  11  -3   58.47    5.84 
   5  11  -3   78.04   16.28 
   5  11  -3   65.92   18.18 
  -5 -11   3   72.60   12.99 
  -5 -11   3   65.04    7.10 
  -5 -11   3  109.33   23.22 
  -5 -11   3   79.57   20.05 
   5  11  -3  135.03   74.20 
  -5 -11   3  -10.08   74.23 
   4  11  -3   -1.73    9.72 
   4  11  -3   32.11   13.95 
   4  11  -3    0.93    4.49 
  -4 -11   3    1.68   16.07 
  -4 -11   3    7.61    4.88 
  -4 -11   3   -0.42    6.92 
  -4 -11   3    5.09    0.74 
  -4 -11   3    2.77    0.71 
  -4 -11   3    0.98   13.14 
   4  11  -3   37.57   50.11 
  -4 -11   3   -8.37   55.79 
   3  11  -3    0.38   14.92 
   3  11  -3   -4.88   18.02 
   3  11  -3   10.52    3.29 
  -3 -11   3   19.45   19.64 
  -3 -11   3    0.46    4.32 
  -3 -11   3   20.04   23.60 
   3  11  -3   -8.49   69.41 
  -3 -11   3   -3.39   90.27 
   2  11  -3    9.23   15.02 
   2  11  -3   12.60   16.35 
  -2 -11   3   20.19   20.54 
  -2 -11   3   20.43   18.71 
   2  11  -3  -57.89   73.51 
  -2 -11   3  -90.94   96.83 
   1  11  -3  182.03   24.48 
   1  11  -3  129.98   23.42 
  -1 -11   3  160.02   27.11 
  -1 -11   3  142.50   28.54 
   1  11  -3  228.93   70.97 
  -1 -11   3  219.17  115.81 
   0  11  -3  -11.69   16.58 
   0  11  -3    4.29   18.31 
   0 -11   3   -3.30   18.35 
   0 -11   3    8.09   23.75 
   0  11  -3  -26.88   64.18 
   0 -11   3    7.04  113.50 
  -1  11  -3   15.66   17.73 
   1 -11   3    9.88   18.63 
   1 -11   3  -17.40   22.04 
  -1  11  -3   87.81   74.41 
   1 -11   3  -21.48   86.45 
  -2  11  -3   52.30   26.18 
  -2  11  -3   51.59    4.13 
  -2  11  -3   38.03   26.40 
   2 -11   3   44.97   31.80 
   2 -11   3   65.58   25.26 
  -2  11  -3  119.73   80.59 
  -2  11  -3   15.26   62.04 
   2 -11   3   42.83  132.89 
  -3  11  -3    8.44   20.40 
  -3  11  -3    5.69    3.46 
  -3  11  -3    2.71   19.74 
   3 -11   3   -1.73   22.65 
  -3  11  -3   66.35   65.89 
  -3  11  -3   27.30   78.89 
   3 -11   3 -111.71  102.73 
  -4  11  -3   36.03    5.24 
  -4  11  -3   29.82   23.62 
   4 -11   3   61.15   27.54 
  -4  11  -3  -51.06   82.33 
   4 -11   3    1.79  156.58 
  -5  11  -3   13.22    5.33 
  -5  11  -3   12.09   23.69 
   5 -11   3   -3.11   26.10 
   5 -11   3  -85.93  113.04 
  -6  11  -3    2.10    5.83 
  -6  11  -3    6.70   25.53 
   6 -11   3   26.79   29.10 
  -7  11  -3   -1.90    4.70 
  -7  11  -3   -1.91   27.99 
   7 -11   3   51.60   32.66 
 -10 -10   3  112.10    9.28 
   9  10  -3    2.91    5.85 
  -9 -10   3   -7.01   11.85 
  -9 -10   3    3.23    7.76 
   8  10  -3   17.05    8.62 
   8  10  -3    9.27   10.09 
  -8 -10   3   28.17    5.76 
  -8 -10   3    6.39   11.04 
  -8 -10   3   14.20   11.85 
  -8 -10   3   27.30   51.74 
   7  10  -3  435.31   37.99 
   7  10  -3  446.30   43.06 
  -7 -10   3  406.47   37.80 
  -7 -10   3  454.32   28.04 
  -7 -10   3  422.24   40.69 
  -7 -10   3  486.04   41.20 
  -7 -10   3  209.59   69.05 
  -7 -10   3  168.35  295.55 
   6  10  -3  481.83   36.69 
   6  10  -3  434.88   35.44 
   6  10  -3  479.14   32.01 
  -6 -10   3  417.22   32.44 
  -6 -10   3  380.05   32.79 
  -6 -10   3  463.54   26.09 
  -6 -10   3  442.84   53.51 
  -6 -10   3   82.04  158.12 
   5  10  -3    4.91   14.12 
   5  10  -3    4.01    4.39 
   5  10  -3    8.61   11.60 
  -5 -10   3    2.72    4.46 
  -5 -10   3    5.71   10.55 
  -5 -10   3   -0.55   16.39 
  -5 -10   3   13.47   10.07 
   5  10  -3   70.50   60.93 
  -5 -10   3    0.00   61.50 
   4  10  -3  451.79   33.28 
   4  10  -3  763.33   92.44 
   4  10  -3  483.02   36.78 
  -4 -10   3  557.08   50.75 
  -4 -10   3  482.96   26.19 
  -4 -10   3  478.25   41.51 
   4  10  -3  476.81   75.61 
  -4 -10   3  373.05   90.66 
   3  10  -3   29.77    4.77 
   3  10  -3   34.40   11.40 
   3  10  -3   56.86   19.03 
  -3 -10   3   53.88   22.42 
  -3 -10   3   30.11   13.95 
   3  10  -3   86.40   47.17 
  -3 -10   3    6.50   51.58 
   2  10  -3   10.57   18.43 
   2  10  -3   23.23   11.36 
   2  10  -3    0.71    2.69 
  -2 -10   3   -4.64   13.03 
  -2 -10   3   -5.47   21.76 
   2  10  -3  -48.13   62.23 
  -2 -10   3   95.07   62.93 
   1  10  -3   16.72   12.11 
   1  10  -3   -7.79   14.22 
  -1 -10   3   21.96   23.09 
  -1 -10   3   42.48   16.36 
   1  10  -3  -24.44   47.91 
  -1 -10   3   36.98   67.81 
   0  10  -3   18.17   13.62 
   0  10  -3   63.34   17.53 
   0 -10   3   39.89   18.84 
   0 -10   3   31.13   16.76 
   0  10  -3  -32.98   55.22 
   0 -10   3  -36.01   94.69 
  -1  10  -3  125.24    6.97 
  -1  10  -3   85.33   20.89 
   1 -10   3  107.72   22.65 
   1 -10   3   99.10   23.77 
  -1  10  -3  146.78   93.24 
  -1  10  -3   41.02   66.09 
   1 -10   3   56.12  107.89 
  -2  10  -3  884.32   52.96 
  -2  10  -3  827.01   68.82 
  -2  10  -3  930.07   70.60 
   2 -10   3  917.38   85.54 
   2 -10   3  936.63   68.03 
  -2  10  -3  714.98  125.13 
  -2  10  -3  646.55  120.28 
   2 -10   3  402.86  130.17 
  -3  10  -3  545.91   30.73 
  -3  10  -3  495.92   53.90 
  -3  10  -3  602.43   62.64 
   3 -10   3  479.86   53.97 
   3 -10   3  477.12   46.33 
  -3  10  -3  192.69  120.15 
  -3  10  -3  225.87   89.73 
   3 -10   3  570.91  124.69 
  -4  10  -3   57.79    5.77 
  -4  10  -3   55.62   23.03 
  -4  10  -3   79.82   33.20 
   4 -10   3   68.82   23.95 
   4 -10   3   13.99   32.35 
  -4  10  -3   84.14  122.14 
   4 -10   3  -35.35  146.91 
  -5  10  -3   30.38    5.50 
  -5  10  -3   49.36   24.04 
   5 -10   3   43.84   23.89 
  -5  10  -3  -49.16   81.77 
   5 -10   3 -152.16  107.07 
  -6  10  -3  112.00   38.07 
  -6  10  -3   75.32    7.00 
   6 -10   3   73.23    7.66 
   6 -10   3  138.37   39.15 
   6 -10   3  105.53  130.61 
  -7  10  -3   -0.25   26.82 
  -7  10  -3    5.40    6.66 
   7 -10   3    3.48   25.86 
  -8  10  -3   -0.87    8.30 
  -8  10  -3   30.89   44.65 
   8 -10   3   29.72   40.97 
 -11  -9   3  129.83   10.56 
 -10  -9   3  142.53   10.31 
  -9  -9   3   10.39    5.36 
  -9  -9   3   24.84   12.18 
   8   9  -3    2.25    8.85 
   8   9  -3   -0.20    5.44 
  -8  -9   3   -4.60   10.40 
  -8  -9   3    6.95    7.57 
  -8  -9   3   -5.86    7.59 
  -8  -9   3   -7.12    5.17 
  -8  -9   3   55.38   44.03 
   7   9  -3  131.47   17.48 
  -7  -9   3  156.03   16.30 
  -7  -9   3  145.31    9.51 
  -7  -9   3  123.37   18.38 
  -7  -9   3  130.16   16.14 
  -7  -9   3 -191.56  229.74 
  -7  -9   3  160.27   48.52 
  -7  -9   3   76.69   41.66 
   6   9  -3   36.02   12.09 
   6   9  -3   34.88    5.06 
   6   9  -3   36.06    9.77 
  -6  -9   3   14.54   11.75 
  -6  -9   3   46.80   11.43 
  -6  -9   3   -4.71   12.72 
  -6  -9   3   32.72    4.20 
  -6  -9   3  -36.82  143.97 
  -6  -9   3  -11.26   43.90 
   5   9  -3   -1.58    2.67 
   5   9  -3   -4.18    9.54 
   5   9  -3    6.57   12.14 
  -5  -9   3    6.72   14.55 
  -5  -9   3   -3.57    4.00 
  -5  -9   3    7.39   12.80 
  -5  -9   3   -7.80    9.29 
   5   9  -3   41.43   47.81 
  -5  -9   3   14.26   51.19 
  -5  -9   3  -29.86  173.78 
   4   9  -3   27.05   11.88 
   4   9  -3   32.40   14.49 
   4   9  -3   25.30    3.56 
  -4  -9   3    3.92   14.17 
  -4  -9   3   58.39   17.70 
  -4  -9   3   20.34    3.46 
  -4  -9   3    9.86   10.00 
   4   9  -3   34.64   48.52 
  -4  -9   3   45.60   56.69 
   3   9  -3  328.38   38.70 
   3   9  -3  259.33   15.37 
   3   9  -3  300.65   31.86 
  -3  -9   3  327.56   28.94 
  -3  -9   3  265.07   14.39 
  -3  -9   3  252.53   28.99 
   3   9  -3  326.60   70.47 
  -3  -9   3  352.13   79.91 
   2   9  -3  535.69   33.72 
   2   9  -3  476.23   46.19 
   2   9  -3  510.36   71.28 
  -2  -9   3  511.53   43.72 
  -2  -9   3  514.35   48.44 
   2   9  -3  363.19   79.20 
  -2  -9   3  556.01   96.60 
   1   9  -3  758.61   54.58 
   1   9  -3  761.98   63.89 
  -1  -9   3  733.18   52.59 
  -1  -9   3  706.51   65.45 
   1   9  -3  644.97  105.74 
  -1  -9   3  647.04  117.73 
   0   9  -3   35.97   20.20 
   0   9  -3   48.87   13.53 
   0  -9   3   40.83   23.87 
   0  -9   3   38.65   15.70 
   0   9  -3   28.23   71.27 
   0   9  -3   90.17   74.26 
   0  -9   3   67.30   69.63 
  -1   9  -3   99.12   19.38 
  -1   9  -3   65.38    4.40 
   1  -9   3   69.94   23.58 
   1  -9   3   56.58   19.41 
  -1   9  -3   45.99   59.42 
  -1   9  -3   43.75   68.74 
   1  -9   3  117.54   94.60 
  -2   9  -3    2.96    2.44 
  -2   9  -3   15.32   16.28 
  -2   9  -3   -3.15   18.11 
   2  -9   3   -7.29   15.93 
   2  -9   3    3.36   16.26 
  -2   9  -3   47.33   65.08 
  -2   9  -3    7.55   73.07 
   2  -9   3   15.67   74.84 
  -3   9  -3  196.68   26.53 
  -3   9  -3  206.01   26.56 
  -3   9  -3  168.78   12.56 
   3  -9   3  174.02   26.74 
   3  -9   3  154.34   25.75 
  -3   9  -3  369.83   88.36 
   3  -9   3  166.88   88.83 
  -4   9  -3   -2.25   24.15 
  -4   9  -3    8.96   25.84 
   4  -9   3    4.94   19.17 
   4  -9   3  -27.34   26.24 
  -4   9  -3  -89.78   78.74 
   4  -9   3  147.20  129.32 
  -5   9  -3  199.78   13.44 
  -5   9  -3  189.00   35.74 
   5  -9   3  120.09   28.18 
   5  -9   3  192.84   37.27 
  -5   9  -3  -16.75  122.00 
   5  -9   3  386.05  117.00 
  -6   9  -3  129.95   28.86 
  -6   9  -3   88.74    8.35 
   6  -9   3  162.01   30.17 
   6  -9   3   72.17   27.13 
   6  -9   3  100.28    9.29 
   6  -9   3   35.56  104.52 
  -7   9  -3   59.04    7.84 
  -7   9  -3   98.64   37.46 
   7  -9   3   50.27    4.88 
   7  -9   3   98.72   36.36 
   7  -9   3   12.75  113.45 
  -8   9  -3  200.29   37.44 
  -8   9  -3  127.87   12.85 
   8  -9   3  118.88   41.76 
   8  -9   3 -125.37  203.06 
 -11  -8   3   69.22    7.85 
 -10  -8   3  488.19   31.70 
  -9  -8   3  450.67   26.93 
  -9  -8   3  382.89   31.46 
   8   8  -3  118.57   11.31 
   8   8  -3   98.10    8.67 
  -8  -8   3  118.18   10.77 
  -8  -8   3  134.16    7.79 
  -8  -8   3  109.10   10.45 
  -8  -8   3  105.62   14.57 
  -8  -8   3   69.36   24.22 
  -8  -8   3   41.26   18.38 
   7   8  -3  213.19   26.57 
   7   8  -3  236.99   25.92 
  -7  -8   3  241.45   21.57 
  -7  -8   3  217.19   22.02 
  -7  -8   3  263.88   20.70 
  -7  -8   3  264.79   14.12 
  -7  -8   3   -2.39  210.87 
  -7  -8   3  194.02   44.10 
  -7  -8   3  227.20   44.19 
   6   8  -3   69.17   14.18 
   6   8  -3   27.37    3.68 
   6   8  -3   14.39    8.39 
  -6  -8   3   49.88   11.08 
  -6  -8   3   29.08    9.76 
  -6  -8   3   25.75   12.62 
  -6  -8   3 -155.92  117.89 
  -6  -8   3   86.96   45.28 
   5   8  -3   66.23   10.82 
   5   8  -3   54.97    4.71 
   5   8  -3   56.81   12.21 
  -5  -8   3   54.27   11.28 
  -5  -8   3   56.30   13.16 
  -5  -8   3   57.74    5.43 
  -5  -8   3   64.58   12.82 
   5   8  -3   72.96   37.18 
  -5  -8   3   57.14  123.50 
  -5  -8   3   42.03   40.97 
   4   8  -3  107.39   13.97 
   4   8  -3   81.19   12.56 
   4   8  -3  110.26   10.41 
  -4  -8   3  113.94   16.35 
  -4  -8   3  125.57   15.44 
  -4  -8   3   90.00   13.15 
  -4  -8   3  103.96    6.90 
   4   8  -3  100.75   44.59 
  -4  -8   3  145.43  149.61 
  -4  -8   3  120.28   50.23 
   3   8  -3   13.79    8.03 
   3   8  -3    7.57    9.46 
   3   8  -3    4.41    2.53 
  -3  -8   3   -4.15    9.53 
  -3  -8   3   -3.99   10.69 
   3   8  -3  -10.62   30.28 
  -3  -8   3   13.89   37.90 
   2   8  -3  177.03   18.26 
   2   8  -3  199.42   10.93 
   2   8  -3  164.45   22.55 
  -2  -8   3  220.70   20.99 
  -2  -8   3  167.16   24.11 
   2   8  -3  229.47   56.81 
  -2  -8   3  170.76   66.08 
   1   8  -3  349.87   27.46 
   1   8  -3  255.94   37.02 
  -1  -8   3  315.28   29.11 
  -1  -8   3  269.01   29.04 
   1   8  -3  291.65   89.02 
   1   8  -3  305.24   70.64 
  -1  -8   3  226.63   79.82 
   0   8  -3  231.61   23.52 
   0   8  -3  227.36   21.45 
   0  -8   3  149.71   22.76 
   0  -8   3  209.04   23.76 
   0   8  -3  211.85   57.10 
   0   8  -3  179.97   81.31 
   0  -8   3  191.55   65.79 
  -1   8  -3  236.64   12.56 
  -1   8  -3  255.70   25.69 
   1  -8   3  191.47   27.90 
   1  -8   3  258.43   27.29 
  -1   8  -3  341.37   69.37 
  -1   8  -3  293.08  104.08 
   1  -8   3  168.24   91.96 
  -2   8  -3 1055.20   73.63 
  -2   8  -3 1021.13   75.76 
  -2   8  -3 1027.96   55.17 
   2  -8   3  975.69   72.99 
   2  -8   3  956.28   71.30 
  -2   8  -3 1180.87  141.43 
   2  -8   3  811.24  155.66 
  -3   8  -3  250.75   28.69 
  -3   8  -3  264.91   15.33 
  -3   8  -3  310.39   30.27 
   3  -8   3  234.47   29.01 
   3  -8   3  254.90   29.37 
  -3   8  -3  200.70   74.98 
   3  -8   3  192.90   77.85 
  -4   8  -3  324.34   32.57 
  -4   8  -3  254.79   17.03 
  -4   8  -3  276.41   35.27 
   4  -8   3  283.34   32.22 
   4  -8   3  276.65   31.97 
  -4   8  -3  335.39   86.29 
   4  -8   3  108.16   87.00 
  -5   8  -3   24.55    4.68 
  -5   8  -3   31.65   19.12 
  -5   8  -3   -8.71   24.97 
   5  -8   3   37.09   26.77 
   5  -8   3  -10.08   17.54 
  -5   8  -3   27.38   76.55 
   5  -8   3  -43.63  121.29 
  -6   8  -3   26.08   20.67 
  -6   8  -3   12.04    5.11 
   6  -8   3  -10.92   27.57 
   6  -8   3  -29.44   18.78 
   6  -8   3    9.66    2.50 
  -6   8  -3   69.99   78.46 
   6  -8   3   15.97  133.33 
  -7   8  -3  170.39   29.72 
  -7   8  -3  152.30   13.10 
   7  -8   3  152.45   11.90 
   7  -8   3  209.32   37.43 
   7  -8   3   96.51   28.75 
   7  -8   3  199.61  114.71 
  -8   8  -3   33.56   33.91 
  -8   8  -3    8.79    6.91 
   8  -8   3   -9.32   33.30 
   8  -8   3  129.94  132.49 
  -9   8  -3   16.47   42.36 
  -9   8  -3    6.09    6.02 
   9  -8   3   10.02   36.37 
   9  -8   3   -4.86   16.88 
 -11  -7   3   -1.67    5.37 
 -10  -7   3   -7.04    5.01 
  -9  -7   3  223.16   13.74 
  -8  -7   3   11.11    7.34 
  -8  -7   3   16.35    4.51 
   7   7  -3  140.77   15.94 
   7   7  -3  120.96   10.57 
  -7  -7   3  102.83   12.21 
  -7  -7   3  141.09    7.58 
  -7  -7   3  123.24   11.70 
  -7  -7   3  127.66   13.03 
  -7  -7   3  107.80   32.81 
  -7  -7   3  104.84   27.63 
  -7  -7   3  200.87  198.97 
   6   7  -3  348.54   25.64 
  -6  -7   3  315.68   26.28 
  -6  -7   3  349.72   28.90 
  -6  -7   3  350.85   17.14 
  -6  -7   3  359.98   37.93 
  -6  -7   3  221.19   43.04 
  -6  -7   3  165.63  126.52 
  -6  -7   3  289.58   51.76 
   5   7  -3 1025.06   89.64 
   5   7  -3 1058.02   72.88 
   5   7  -3 1062.11   77.58 
  -5  -7   3 1084.08   49.27 
  -5  -7   3 1027.53   70.23 
  -5  -7   3 1010.17   64.96 
  -5  -7   3 1027.52   79.12 
  -5  -7   3  912.06  102.53 
  -5  -7   3  736.76  188.48 
   4   7  -3  586.81   42.74 
   4   7  -3  596.12   48.62 
   4   7  -3  568.00   38.52 
  -4  -7   3  610.28   41.48 
  -4  -7   3  622.05   39.95 
  -4  -7   3  618.83   28.50 
  -4  -7   3  627.25   46.14 
   4   7  -3  660.98   83.69 
  -4  -7   3  553.18  166.00 
  -4  -7   3  534.37   71.41 
   3   7  -3 1927.54  102.86 
   3   7  -3 1841.56  134.45 
   3   7  -3 1845.25  123.49 
  -3  -7   3 1913.68  126.37 
  -3  -7   3 1887.68  114.97 
   3   7  -3 2151.65  211.13 
  -3  -7   3 1757.21  205.39 
   2   7  -3 2651.44  181.21 
   2   7  -3 2778.10  148.89 
   2   7  -3 2844.96  192.69 
  -2  -7   3 3045.99  178.73 
  -2  -7   3 2731.72  171.70 
   2   7  -3 3076.65  320.44 
  -2  -7   3 2971.60  315.49 
   1   7  -3  166.83   17.80 
   1   7  -3  142.52   18.27 
  -1  -7   3  108.96   17.70 
  -1  -7   3  140.00   19.76 
   1   7  -3   82.25   56.74 
   1   7  -3   25.93   35.97 
  -1  -7   3  162.33   62.78 
   0   7  -3   48.58   11.64 
   0   7  -3   42.93   13.16 
   0  -7   3   37.81   13.45 
   0  -7   3   58.09   14.93 
   0   7  -3    6.90   71.75 
   0   7  -3   24.01   38.40 
   0  -7   3  100.06   51.37 
  -1   7  -3   17.38   20.34 
  -1   7  -3    4.30    1.56 
   1  -7   3    8.91   13.16 
   1  -7   3    4.88   12.01 
  -1   7  -3   18.73   42.49 
   1  -7   3   30.98   49.87 
  -2   7  -3   92.13   20.88 
  -2   7  -3  100.21   18.00 
  -2   7  -3   75.43    5.32 
   2  -7   3   87.58   21.78 
   2  -7   3   71.17   17.72 
  -2   7  -3  111.80   56.86 
   2  -7   3  283.27  136.70 
  -3   7  -3  145.82   24.70 
  -3   7  -3  117.10   34.22 
  -3   7  -3  128.71    7.62 
   3  -7   3   97.70   23.37 
   3  -7   3  177.23   27.00 
  -3   7  -3  163.92   83.36 
   3  -7   3  127.76   92.36 
  -4   7  -3  327.96   31.76 
  -4   7  -3  362.64   33.01 
   4  -7   3  248.25   30.01 
   4  -7   3  237.47   29.17 
  -4   7  -3  273.96   82.57 
   4  -7   3  348.50   92.26 
  -5   7  -3  221.57   28.55 
  -5   7  -3  236.93   28.94 
   5  -7   3  163.68   25.78 
   5  -7   3  201.86   27.55 
  -5   7  -3   74.89   73.78 
   5  -7   3  156.52   84.59 
  -6   7  -3  384.58   46.00 
  -6   7  -3  471.35   44.93 
   6  -7   3  414.91   42.34 
   6  -7   3  518.99   52.67 
   6  -7   3  482.85   25.59 
  -6   7  -3  583.49  150.09 
   6  -7   3  653.26  128.09 
  -7   7  -3  517.66   47.94 
   7  -7   3  496.30   36.13 
   7  -7   3  480.82   45.97 
   7  -7   3  444.70   46.82 
   7  -7   3  508.71  133.72 
  -8   7  -3   23.44   23.30 
   8  -7   3   -6.55   20.68 
   8  -7   3   10.02    3.20 
   8  -7   3  -24.06   31.43 
   8  -7   3   87.88  149.02 
  -9   7  -3   -3.40   23.17 
  -9   7  -3    1.83   15.18 
   9  -7   3    8.20   24.19 
   9  -7   3   -0.25   16.31 
  10  -7   3  139.02   43.44 
 -11  -6   3   -2.60    4.93 
 -11  -6   3   -7.35    6.17 
 -10  -6   3    3.63    4.69 
 -10  -6   3   -0.94    3.69 
  -9  -6   3   11.06    3.26 
  -9  -6   3   19.26    3.97 
  -8  -6   3    2.60    6.87 
  -8  -6   3   10.95    4.08 
  -8  -6   3   11.56    4.41 
  -8  -6   3  230.89  223.90 
  -7  -6   3  188.80   11.37 
  -7  -6   3  177.76   15.46 
  -7  -6   3  174.27    9.43 
  -7  -6   3  -95.97  181.61 
   6   6  -3  403.89   37.39 
   6   6  -3  415.79   26.61 
  -6  -6   3  415.29   20.33 
  -6  -6   3  414.73   28.87 
  -6  -6   3  403.98   34.02 
  -6  -6   3  422.52   34.56 
  -6  -6   3  438.50   25.44 
  -6  -6   3  232.09  135.14 
  -6  -6   3  309.17   50.96 
  -6  -6   3  360.48   44.72 
   5   6  -3  762.15   49.06 
  -5  -6   3  776.23   48.75 
  -5  -6   3  775.04   58.90 
  -5  -6   3  812.12   37.13 
  -5  -6   3  791.00   54.07 
  -5  -6   3  757.15   81.42 
  -5  -6   3  461.13  141.20 
   4   6  -3  408.54   20.55 
   4   6  -3  355.72   25.30 
   4   6  -3  358.36   26.77 
  -4  -6   3  373.10   28.40 
  -4  -6   3  418.47   30.40 
  -4  -6   3  367.57   26.61 
  -4  -6   3  368.97   18.39 
   4   6  -3  399.78   51.26 
  -4  -6   3  329.28  141.42 
  -4  -6   3  358.41   52.34 
   3   6  -3   30.69    6.72 
   3   6  -3   24.59    4.27 
   3   6  -3   21.76    9.76 
  -3  -6   3   26.90   10.16 
  -3  -6   3   26.55   11.10 
   3   6  -3   23.05   28.72 
  -3  -6   3    7.62   33.22 
  -3  -6   3   85.45  116.57 
   2   6  -3  496.92   34.51 
   2   6  -3  534.79   37.77 
   2   6  -3  446.70   52.34 
  -2  -6   3  519.99   35.06 
  -2  -6   3  471.48   41.58 
  -2  -6   3  503.72   26.19 
   2   6  -3  456.63   55.55 
   2   6  -3  241.55   76.27 
  -2  -6   3  394.61   64.64 
   1   6  -3  344.67   26.16 
   1   6  -3  382.03   28.98 
  -1  -6   3  354.41   27.37 
  -1  -6   3  342.26   27.72 
   1   6  -3  312.15   51.65 
   1   6  -3  356.22   88.59 
  -1  -6   3  313.72   56.96 
   0   6  -3 1383.30  105.18 
   0   6  -3 1413.41   96.24 
   0  -6   3 1344.98   87.33 
   0  -6   3 1504.00   89.40 
   0   6  -3 1284.30  188.41 
   0   6  -3 1453.80  156.98 
   0  -6   3 1397.53  185.39 
  -1   6  -3 1594.70   87.99 
  -1   6  -3 1710.25  122.66 
   1  -6   3 1574.44  104.45 
   1  -6   3 1517.74  101.31 
  -1   6  -3 1622.69  196.88 
   1  -6   3 2164.93  231.78 
  -2   6  -3   16.21   12.15 
  -2   6  -3   33.92   13.42 
   2  -6   3   81.96   19.25 
   2  -6   3   10.80   12.75 
  -2   6  -3  -26.31   42.08 
   2  -6   3  -85.26   50.35 
  -3   6  -3   47.15   15.01 
  -3   6  -3   32.08   14.73 
   3  -6   3   12.48   13.95 
   3  -6   3   21.26   13.98 
  -3   6  -3   46.05   53.32 
   3  -6   3   90.94   60.17 
  -4   6  -3  132.71   21.43 
  -4   6  -3  132.53   21.14 
   4  -6   3  122.17   20.72 
   4  -6   3  181.74   22.89 
  -4   6  -3  178.69   68.13 
   4  -6   3  308.73   79.88 
  -5   6  -3    3.06   15.42 
  -5   6  -3   35.86   17.59 
   5  -6   3    7.51   15.75 
   5  -6   3   42.05   17.90 
  -5   6  -3   34.91   69.99 
   5  -6   3  -64.69   67.47 
  -6   6  -3  272.44   37.18 
  -6   6  -3  285.12   36.90 
   6  -6   3  281.82   14.50 
   6  -6   3  293.67   35.50 
   6  -6   3  261.19   36.34 
  -6   6  -3  143.07  114.17 
   6  -6   3  284.07  121.42 
  -7   6  -3  476.73   73.10 
  -7   6  -3  677.91   63.97 
   7  -6   3  686.94   46.59 
   7  -6   3  705.23   55.58 
   7  -6   3  549.09   75.01 
  -7   6  -3  465.01  138.37 
   7  -6   3  807.33  162.07 
  -8   6  -3  294.50   36.85 
   8  -6   3  313.26   34.91 
   8  -6   3  289.92   20.54 
   8  -6   3  230.95   40.47 
   8  -6   3  204.92  133.39 
  -9   6  -3    9.32   31.48 
   9  -6   3   30.86   31.32 
   9  -6   3    9.40    3.57 
   9  -6   3   -8.54   31.97 
   9  -6   3   11.16   11.01 
 -10   6  -3  -39.05   35.91 
  10  -6   3  -21.87   33.59 
  10  -6   3    7.06   12.99 
 -11  -5   3   13.71    3.71 
 -11  -5   3   11.29    4.70 
 -10  -5   3    4.88    3.92 
 -10  -5   3    8.66    4.53 
  -9  -5   3   -2.90    2.78 
  -9  -5   3   10.71    4.90 
  -8  -5   3   10.99    3.77 
  -8  -5   3    7.85    4.34 
  -8  -5   3   -3.25    6.16 
  -8  -5   3   38.79  149.48 
  -7  -5   3  459.57   33.66 
  -7  -5   3  548.28   28.61 
  -7  -5   3  523.39   25.51 
  -7  -5   3  339.32  144.59 
  -6  -5   3  475.39   25.11 
  -6  -5   3  485.99   31.91 
  -6  -5   3  447.57   22.88 
  -6  -5   3  296.90  166.09 
   5   5  -3    2.02    3.82 
   5   5  -3   -2.62    4.66 
  -5  -5   3    3.26    4.16 
  -5  -5   3    6.17    3.95 
  -5  -5   3  -11.44    8.13 
  -5  -5   3    3.19    2.28 
  -5  -5   3   -0.54    3.13 
  -5  -5   3  -12.88   16.94 
  -5  -5   3  -65.53   85.40 
  -5  -5   3   16.39   18.01 
   4   5  -3 1398.37   92.83 
   4   5  -3 1502.17  118.37 
  -4  -5   3 1509.61  108.50 
  -4  -5   3 1454.89   98.33 
  -4  -5   3 1549.44   76.00 
  -4  -5   3 1508.90   77.58 
  -4  -5   3 1539.19  104.74 
  -4  -5   3 1359.33  148.10 
  -4  -5   3 1430.38  215.16 
   3   5  -3   71.92    8.99 
   3   5  -3   45.14    4.22 
   3   5  -3   57.40    6.84 
  -3  -5   3   51.37    9.02 
  -3  -5   3   39.79    7.47 
  -3  -5   3   61.22    9.82 
   3   5  -3   43.13   22.54 
  -3  -5   3   69.55   28.03 
  -3  -5   3   87.32  162.60 
   2   5  -3 4997.26  344.41 
   2   5  -3 5187.97  284.28 
   2   5  -3 5034.44  446.69 
  -2  -5   3 5213.14  368.92 
  -2  -5   3 5158.24  346.65 
   2   5  -3 5155.38  617.80 
   2   5  -3 5109.17  567.83 
  -2  -5   3 5456.56  553.19 
   1   5  -3  296.06   22.29 
   1   5  -3  306.84   17.94 
   1   5  -3  296.52   21.86 
  -1  -5   3  266.69   22.63 
  -1  -5   3  308.96   23.33 
   1   5  -3  282.94   65.36 
   1   5  -3  228.70   40.88 
  -1  -5   3  241.32   45.42 
   0   5  -3  175.39   19.76 
   0  -5   3  203.23   20.37 
   0  -5   3  153.67   17.16 
   0   5  -3  145.95   47.88 
   0  -5   3  132.76   53.88 
  -1   5  -3  477.71   38.80 
  -1   5  -3  470.41   42.94 
   1  -5   3  453.20   38.50 
   1  -5   3  399.26   37.45 
  -1   5  -3  364.54   69.56 
   1  -5   3  321.35   75.84 
  -2   5  -3  961.82   77.40 
  -2   5  -3 1039.12   77.70 
   2  -5   3  955.51   71.29 
   2  -5   3 1105.48   72.19 
  -2   5  -3 1063.03  137.82 
   2  -5   3 1126.19  142.71 
  -3   5  -3  769.96   62.04 
  -3   5  -3  858.47   87.79 
   3  -5   3  803.62   63.22 
   3  -5   3  809.71   54.53 
  -3   5  -3  877.91  114.81 
   3  -5   3  847.87  118.31 
  -4   5  -3  657.01   51.60 
  -4   5  -3  737.05   50.18 
   4  -5   3  625.56   48.55 
   4  -5   3  671.49   48.14 
  -4   5  -3  582.45   97.26 
   4  -5   3  665.29  100.40 
  -5   5  -3 1397.71   94.00 
  -5   5  -3 1553.41   94.39 
   5  -5   3 1369.17   93.15 
   5  -5   3 1438.88  106.98 
  -5   5  -3 1382.63  176.48 
   5  -5   3 1488.64  181.16 
  -6   5  -3  150.66   25.41 
  -6   5  -3  158.67   31.09 
   6  -5   3  219.97   30.78 
   6  -5   3  224.45   11.35 
   6  -5   3  157.29   27.98 
  -6   5  -3  203.66  102.13 
   6  -5   3   63.75  101.09 
  -7   5  -3   55.36   26.35 
  -7   5  -3    9.53   25.78 
   7  -5   3  -13.29   23.52 
   7  -5   3    8.11    2.60 
   7  -5   3   -1.54   22.71 
  -7   5  -3 -209.71  109.23 
   7  -5   3  -67.31  107.64 
  -8   5  -3   82.24   30.97 
   8  -5   3   60.20   28.53 
   8  -5   3   72.64    5.06 
   8  -5   3   86.78   27.66 
   8  -5   3  291.25  125.09 
  -9   5  -3   11.98   30.03 
   9  -5   3   15.68   26.56 
   9  -5   3    4.37    9.79 
   9  -5   3   -0.07    3.18 
   9  -5   3   -5.11   28.29 
   9  -5   3  -51.65  127.04 
 -10   5  -3  161.85   33.50 
  10  -5   3  198.07   32.23 
  10  -5   3  154.22   20.06 
  11   4  -3  192.60   28.18 
 -11  -4   3  183.12   12.35 
 -11  -4   3  180.22   15.12 
  10   4  -3  166.12   25.15 
 -10  -4   3  177.82   12.12 
 -10  -4   3  180.59   15.79 
   9   4  -3   24.14   16.60 
  -9  -4   3    7.85    4.85 
  -9  -4   3    1.80    3.73 
  -9  -4   3  -53.05  171.32 
   8   4  -3   60.09   16.06 
  -8  -4   3   45.75    5.06 
  -8  -4   3   48.33    3.99 
  -8  -4   3   49.16  196.35 
   7   4  -3   53.27   11.51 
  -7  -4   3   53.28   10.39 
  -7  -4   3   70.63    5.86 
  -7  -4   3   58.80    4.87 
  -7  -4   3  -37.07  162.86 
  -6  -4   3   -0.88    2.97 
  -6  -4   3    6.38    7.80 
  -6  -4   3   -0.37    3.48 
  -6  -4   3 -150.32  129.13 
  -5  -4   3  824.90   41.35 
  -5  -4   3  765.30   36.62 
  -5  -4   3  732.13   47.67 
  -5  -4   3  960.96  187.08 
   4   4  -3   31.82    4.64 
  -4  -4   3   42.03    4.84 
  -4  -4   3   45.23    3.27 
  -4  -4   3   43.37    8.95 
  -4  -4   3   36.78    4.64 
  -4  -4   3   33.48    3.74 
  -4  -4   3   31.20   16.78 
  -4  -4   3   17.09   11.50 
  -4  -4   3  -23.44   97.26 
   3   4  -3  252.21   15.66 
   3   4  -3  251.20   18.79 
  -3  -4   3  248.13   18.79 
  -3  -4   3  241.42   13.60 
  -3  -4   3  258.67   17.53 
  -3  -4   3  285.17   34.26 
   3   4  -3  191.37   27.28 
  -3  -4   3  221.87   33.36 
  -3  -4   3  328.92  101.46 
   2   4  -3  963.78   74.19 
   2   4  -3  891.65   60.87 
   2   4  -3  842.65   72.23 
  -2  -4   3  950.03   50.28 
  -2  -4   3  963.28   60.73 
  -2  -4   3 1015.58   71.06 
   2   4  -3 1035.44  130.41 
   2   4  -3  965.04  100.07 
  -2  -4   3  839.27  104.29 
   1   4  -3  118.94    7.50 
   1   4  -3  102.35   13.21 
  -1  -4   3   94.11   13.16 
  -1  -4   3  128.65   13.67 
   1   4  -3   35.85   69.15 
   1   4  -3  112.29   33.66 
  -1  -4   3  109.62   30.14 
   0   4  -3  346.23   29.97 
   0   4  -3  354.62   29.95 
   0  -4   3  336.71   26.98 
   0  -4   3  356.69   30.97 
   0   4  -3  249.03   51.47 
   0  -4   3  347.95   58.72 
  -1   4  -3   30.06   14.60 
  -1   4  -3   35.64   10.61 
   1  -4   3   22.67   13.75 
   1  -4   3   61.93   11.74 
  -1   4  -3   66.15   46.56 
   1  -4   3   28.53   35.02 
  -2   4  -3  427.07   32.09 
  -2   4  -3  357.17   29.92 
   2  -4   3  407.88   31.32 
   2  -4   3  374.39   30.33 
  -2   4  -3  390.77   74.57 
   2  -4   3  365.18   65.97 
  -3   4  -3   14.77   15.86 
  -3   4  -3   32.50   12.78 
   3  -4   3   18.06   16.34 
   3  -4   3   31.33   11.84 
  -3   4  -3   -3.38   41.52 
   3  -4   3  -19.18   59.49 
  -4   4  -3   75.10   20.25 
  -4   4  -3   91.97   16.77 
   4  -4   3   71.75   14.96 
   4  -4   3   62.79   19.17 
  -4   4  -3   42.92   51.38 
   4  -4   3   48.82   66.11 
  -5   4  -3  446.67   40.81 
  -5   4  -3  398.62   45.33 
   5  -4   3  551.07   43.62 
   5  -4   3  456.31   47.60 
   5  -4   3  503.19   24.77 
  -5   4  -3  102.20   90.01 
   5  -4   3  539.53   99.21 
  -6   4  -3  813.83   57.74 
  -6   4  -3  760.15   91.91 
   6  -4   3  791.78   67.23 
   6  -4   3  783.60   37.91 
   6  -4   3  705.06   55.34 
  -6   4  -3  791.10  137.85 
   6  -4   3  794.36  123.28 
  -7   4  -3   91.30   20.69 
  -7   4  -3   70.13   26.14 
   7  -4   3   94.99   21.96 
   7  -4   3   53.86    4.24 
   7  -4   3  102.97   23.82 
  -7   4  -3   78.45   99.70 
   7  -4   3   49.71   66.40 
  -8   4  -3  272.05   35.64 
  -8   4  -3  296.27   43.42 
   8  -4   3  341.27   36.32 
   8  -4   3  282.97   17.85 
   8  -4   3  323.09   35.87 
  -8   4  -3  313.03  125.38 
   8  -4   3  240.06   89.90 
  -9   4  -3   47.63   23.48 
   9  -4   3   68.32    6.43 
   9  -4   3   63.25   20.31 
   9  -4   3   90.60   16.56 
   9  -4   3   75.22   21.76 
   9  -4   3   58.66   87.49 
 -10   4  -3  -13.65   31.53 
  10  -4   3    4.17   25.83 
  10  -4   3   -2.28   10.92 
  10  -4   3    6.59    3.92 
  11  -4   3  137.06   30.10 
  11  -4   3  113.18   18.90 
  11   3  -3   22.67   22.02 
 -11  -3   3   47.87    7.48 
 -11  -3   3   38.11    4.25 
  10   3  -3  169.20   22.01 
 -10  -3   3  190.77   15.50 
 -10  -3   3  192.13   10.87 
   9   3  -3   30.35   16.95 
  -9  -3   3   14.09    5.28 
  -9  -3   3   16.29    3.81 
  -9  -3   3   25.06  149.20 
   8   3  -3  210.85   22.27 
  -8  -3   3  168.31   11.11 
  -8  -3   3  172.39   11.15 
  -8  -3   3  162.76  186.42 
   7   3  -3   87.77   16.32 
  -7  -3   3   83.58    5.32 
  -7  -3   3   69.95    9.39 
  -7  -3   3   82.67    6.37 
  -7  -3   3  162.69  122.68 
   6   3  -3  480.38   33.56 
  -6  -3   3  434.50   30.15 
  -6  -3   3  475.18   21.36 
  -6  -3   3  489.89   29.20 
  -6  -3   3  302.94  141.46 
   5   3  -3  156.31   16.52 
  -5  -3   3  184.38   13.74 
  -5  -3   3  175.47    8.65 
  -5  -3   3  151.03    9.91 
  -5  -3   3  -25.11  102.76 
  -4  -3   3 1531.33   78.31 
  -4  -3   3 1407.14  101.35 
  -4  -3   3 1587.48  104.11 
  -4  -3   3 1457.24  196.70 
   3   3  -3   47.74    4.20 
   3   3  -3   49.38    4.36 
  -3  -3   3   38.49    4.03 
  -3  -3   3   49.21    4.36 
  -3  -3   3   39.13    8.38 
  -3  -3   3   41.98    4.13 
  -3  -3   3   80.23   59.97 
  -3  -3   3   33.24   11.29 
   2   3  -3  746.20   60.01 
   2   3  -3  807.90   50.97 
  -2  -3   3  786.50   46.58 
  -2  -3   3  841.80   58.71 
  -2  -3   3  826.43   46.45 
  -2  -3   3  857.27   63.20 
   2   3  -3  823.94  123.70 
   2   3  -3  715.25   90.76 
  -2  -3   3  866.45   90.82 
   1   3  -3 1170.06  105.30 
   1   3  -3 1209.64   91.67 
   1   3  -3 1303.54  101.97 
  -1  -3   3 1262.55   78.89 
  -1  -3   3 1252.74   68.70 
  -1  -3   3 1250.87   86.88 
  -1  -3   3 1237.16   70.54 
   1   3  -3 1300.45  148.03 
   1   3  -3 1307.65  170.95 
  -1  -3   3 1379.31  143.93 
   0   3  -3 2053.79  148.76 
   0   3  -3 2099.26  123.64 
   0   3  -3 2139.85  145.11 
   0  -3   3 2020.78  129.52 
   0  -3   3 2009.66  134.61 
   0   3  -3 2301.10  255.22 
   0  -3   3 2189.98  251.03 
  -1   3  -3  200.32   17.80 
  -1   3  -3  193.65   18.94 
   1  -3   3  205.47   19.15 
   1  -3   3  180.71   16.61 
  -1   3  -3  235.77   44.10 
   1  -3   3  282.09   46.52 
  -2   3  -3  638.81   52.40 
  -2   3  -3  733.59   54.41 
   2  -3   3  621.03   48.53 
  -2   3  -3  631.61   97.95 
   2  -3   3  864.46  105.67 
  -3   3  -3   30.71   26.89 
  -3   3  -3   -6.76   10.17 
   3  -3   3    4.49   10.70 
  -3   3  -3   31.64   55.67 
   3  -3   3    5.16   34.95 
  -4   3  -3  597.99   43.17 
  -4   3  -3  596.41   51.94 
   4  -3   3  578.28   42.70 
   4  -3   3  598.80   57.04 
  -4   3  -3  589.14   90.54 
   4  -3   3  632.43   99.29 
  -5   3  -3 2022.63  128.46 
  -5   3  -3 1999.96  117.22 
   5  -3   3 1801.69  120.15 
   5  -3   3 1730.73  135.07 
   5  -3   3 1833.04   90.50 
  -5   3  -3 1865.46  223.95 
   5  -3   3 2083.01  228.55 
  -6   3  -3   -5.20   13.15 
  -6   3  -3    5.47   14.28 
   6  -3   3   -0.72   13.72 
   6  -3   3    7.95   12.17 
   6  -3   3   20.66    7.90 
  -6   3  -3   70.21   64.83 
   6  -3   3  -23.30   52.56 
  -7   3  -3   -4.73   14.89 
  -7   3  -3  -11.90   21.75 
   7  -3   3   10.37   13.10 
   7  -3   3   64.86   21.87 
  -7   3  -3   92.63   71.98 
   7  -3   3  112.19   85.28 
  -8   3  -3    6.28   23.37 
  -8   3  -3  -13.90   24.12 
   8  -3   3   30.25   20.15 
   8  -3   3   -2.43   19.35 
  -8   3  -3  101.66  107.60 
   8  -3   3   33.91  102.25 
  -9   3  -3   -9.64   19.13 
   9  -3   3   -3.91   12.41 
   9  -3   3   20.03   16.32 
   9  -3   3  -16.34   21.15 
   9  -3   3    5.36    2.46 
  -9   3  -3   17.22   80.52 
   9  -3   3  -30.13  109.92 
 -10   3  -3    1.28   28.38 
  10  -3   3    1.23   14.93 
  10  -3   3   23.17   26.48 
  10  -3   3   18.88    4.24 
  10  -3   3   25.67   26.24 
  10  -3   3  144.06  131.88 
  11  -3   3   14.88   18.35 
  11  -3   3   -0.44   28.55 
  11   2  -3  240.78   31.56 
 -11  -2   3  233.51   15.78 
 -11  -2   3  265.07   18.58 
  10   2  -3  431.55   55.09 
  10   2  -3  587.48   43.03 
  10   2  -3  443.20   60.27 
 -10  -2   3  510.86   27.34 
 -10  -2   3  521.92   38.96 
   9   2  -3  110.47   13.08 
   9   2  -3  103.52   11.48 
   9   2  -3  105.12   16.72 
  -9  -2   3  127.73    9.57 
  -9  -2   3  137.28    7.27 
  -9  -2   3   99.94   14.53 
  -9  -2   3  109.56   16.18 
  -9  -2   3 -122.49  207.21 
  -9  -2   3   84.09   27.98 
   8   2  -3  208.01   20.96 
   8   2  -3  226.76   18.76 
   8   2  -3  222.53   19.77 
  -8  -2   3  248.21   17.19 
  -8  -2   3  232.10   12.31 
  -8  -2   3  173.67   29.03 
  -8  -2   3  214.89   18.00 
  -8  -2   3   30.55  180.27 
  -8  -2   3   98.11   27.23 
   7   2  -3  578.86   52.07 
   7   2  -3  572.46   41.59 
   7   2  -3  541.85   48.00 
  -7  -2   3  636.29   34.41 
  -7  -2   3  571.02   46.85 
  -7  -2   3  604.13   28.61 
  -7  -2   3  566.65   40.14 
  -7  -2   3  433.97  133.51 
  -7  -2   3  321.11   52.85 
   6   2  -3  733.00   52.34 
   6   2  -3  756.46   48.25 
   6   2  -3  721.93   56.22 
  -6  -2   3  739.49   51.61 
  -6  -2   3  718.14   80.85 
  -6  -2   3  784.03   43.07 
  -6  -2   3  758.04   35.28 
  -6  -2   3  827.43   50.13 
  -6  -2   3  686.57  134.40 
  -6  -2   3  637.95   86.78 
   5   2  -3   49.45    9.24 
   5   2  -3   34.26    2.96 
   5   2  -3   31.38    2.96 
  -5  -2   3   32.77    3.00 
  -5  -2   3   30.27    3.11 
  -5  -2   3   32.69    6.21 
  -5  -2   3   26.44    2.68 
  -5  -2   3   36.14    3.28 
  -5  -2   3   25.47    7.20 
  -5  -2   3  -28.83   96.80 
   4   2  -3   13.99    9.46 
  -4  -2   3    8.31    1.73 
  -4  -2   3    7.50    4.93 
  -4  -2   3   14.15    2.24 
  -4  -2   3  -33.14   83.02 
  -3  -2   3  379.91   23.24 
  -3  -2   3  389.37   19.75 
  -3  -2   3  371.38   26.64 
  -3  -2   3  337.99   91.21 
   2   2  -3   93.50    6.64 
   2   2  -3   84.40    7.23 
  -2  -2   3   64.69    9.14 
  -2  -2   3   80.09    5.80 
  -2  -2   3   81.28    6.23 
  -2  -2   3   81.51    6.32 
  -2  -2   3   73.85    4.74 
   2   2  -3   86.72   11.88 
   2   2  -3   74.32   43.77 
  -2  -2   3   76.83   12.80 
  -2  -2   3   55.33   48.43 
   1   2  -3 3195.18  219.38 
   1   2  -3 3181.97  232.99 
  -1  -2   3 2970.25  229.88 
  -1  -2   3 3097.21  189.78 
  -1  -2   3 3073.56  206.04 
   1   2  -3 3212.65  340.52 
   1   2  -3 3145.09  375.81 
  -1  -2   3 3210.27  334.53 
   0   2  -3  890.19   60.15 
   0   2  -3  837.15   71.55 
   0   2  -3  871.04   48.84 
   0   2  -3  906.20   65.67 
   0  -2   3  907.61   50.74 
   0  -2   3  889.78   58.31 
   0  -2   3  902.07   54.85 
   0   2  -3 1014.65  104.58 
   0  -2   3  891.57  103.80 
  -1   2  -3   29.80   10.56 
  -1   2  -3  -10.62   10.57 
   1  -2   3    3.36   10.38 
   1  -2   3   24.45   10.59 
  -1   2  -3   49.01   34.72 
   1  -2   3   20.33   30.77 
  -2   2  -3  896.90   68.51 
  -2   2  -3  886.28   68.29 
   2  -2   3  915.52   70.62 
   2  -2   3  871.70   61.57 
  -2   2  -3  942.31  114.41 
   2  -2   3  877.19  104.97 
  -3   2  -3  396.05   32.02 
  -3   2  -3  402.29   30.47 
   3  -2   3  394.27   79.77 
   3  -2   3  371.30   29.06 
  -3   2  -3  368.42   69.63 
   3  -2   3  357.83   57.67 
  -4   2  -3 1117.63   82.53 
  -4   2  -3 1184.26  106.04 
   4  -2   3  968.49   82.08 
   4  -2   3 1248.55   83.98 
   4  -2   3 1037.32   55.61 
  -4   2  -3 1129.72  137.79 
   4  -2   3  919.41  127.10 
  -5   2  -3 3585.08  231.48 
  -5   2  -3 3309.89  211.56 
   5  -2   3 3279.44  210.20 
   5  -2   3 3153.66  198.05 
   5  -2   3 3434.90  213.99 
  -5   2  -3 3449.54  407.99 
   5  -2   3 3715.12  411.06 
  -6   2  -3 1675.55  104.72 
  -6   2  -3 1666.70  106.17 
   6  -2   3 1652.81   76.50 
  -6   2  -3 2072.02  227.15 
   6  -2   3 1790.06  227.83 
  -7   2  -3   39.77   16.77 
  -7   2  -3   95.96   18.70 
   7  -2   3   78.38    5.06 
   7  -2   3   72.24   15.49 
   7  -2   3   72.36   19.48 
  -7   2  -3   47.09   94.96 
   7  -2   3   25.95   54.14 
  -8   2  -3  195.80   31.11 
  -8   2  -3  184.16   29.72 
   8  -2   3  178.96   10.77 
   8  -2   3  202.05   26.30 
   8  -2   3  175.69   26.25 
  -8   2  -3  167.50  109.59 
   8  -2   3   65.78   92.68 
  -9   2  -3   10.34   27.24 
  -9   2  -3    6.06   17.55 
   9  -2   3   16.39   21.95 
   9  -2   3    8.25    9.03 
   9  -2   3   26.07   20.64 
   9  -2   3    1.69    3.38 
  -9   2  -3   21.82   78.28 
   9  -2   3  -35.36  103.16 
 -10   2  -3    6.79    3.31
[truncated: 1,061,559 more chars]
